# Supplementary material for: Pregnancy establishment in cattle without embryonic interferon tau
Source: Research Square preprint supplement (doi:10.21203/rs.3.rs-8509201/v1), 2026-01-16
Supplement: Supplementary file 1 [file 0603a44bc51f99f35c6308a4.xlsx]

## Sheet: All endometrium proteins (LFQ)
Genes	Protein.Ids	n_peptides	LFQ.F1_KO	LFQ.F2_KO	LFQ.F3_2_KO	LFQ.F4_KO	LFQ.F5_1_WT	LFQ.F5_2_WT	LFQ.F6_1_WT	LFQ.F6_2_WT
TCF20	A0AAA9TL18	4	13.5735	13.416	13.8536	13.556	13.0489	12.9899	13.4591	13.5702
TCOF1	E1BHU1	28	16.5383	16.1739	16.3753	16.2716	16.1298	15.8231	16.3702	16.1638
UNKL	F1MNI6	3	13.119	NA	NA	13.7421	13.206	13.3038	13.44	13.4507
DDRGK1	Q1LZB0;A0AAA9SK08	5	14.6553	15.0266	15.1107	14.7196	15.0807	14.9462	15.1623	15.1112
RBM42	A0A3Q1M222;A0AAA9SKY8;Q0P5L0	3	15.8111	15.6671	15.7393	15.5421	15.5564	15.5421	15.5094	15.6111
MYL3	P85100	10	17.1816	16.59	17.0394	17.2761	17.5859	17.5529	16.8041	16.7639
MTHFD1	A4FUD0	32	17.4063	17.4289	17.093	17.4783	17.6408	17.3997	17.571	17.629
PSMD4	Q58DA0;A0AAA9S3W4	12	17.8812	17.745	17.7824	17.8783	17.9324	17.8223	17.8546	17.8399
RCC2	A6QL85	19	17.8276	17.64	17.7119	17.8029	18.0685	18.0684	17.7766	17.9078
MFSD10	Q0P5M9;A0AAA9SER4	2	14.6942	14.8723	15.5288	14.9877	15.3048	15.4369	15.9206	14.9459
GNG2	P63212	2	15.5777	16.0589	16.0209	16.5111	15.7052	15.2531	16.3509	15.4261
ZFPL1	Q2YDD3	6	15.2087	15.6328	15.5041	15.7488	15.6806	15.8506	15.8587	15.8231
EDC4	E1BJH1	31	17.389	17.2864	17.718	17.3548	17.2978	17.4629	17.4247	17.4604
TPRN	G3MWU7	8	15.0587	15.4721	15.7741	15.2457	15.4084	15.4214	15.8912	15.6527
PFDN4	Q2TBR6	2	15.6475	15.2859	16.3509	15.3745	15.3916	15.2803	15.7632	15.7658
APLP2	F1N226	10	15.9081	16.9255	16.9182	16.34	16.3123	16.2788	16.5823	16.3656
U2SURP	A0AAA9SW45	20	16.0787	15.7969	16.0871	15.8066	15.8033	15.9166	15.9396	16.0188
DKC1	G3X717	16	18.0629	17.8374	17.9386	17.6754	17.8103	17.9758	17.7527	17.7488
ZSWIM8	A7E305;E1BCX3	5	14.9925	15.4307	15.5887	15.1846	15.2015	15.1798	14.967	15.3193
FH	Q148D3	16	18.4393	18.3805	19.3056	18.5316	18.5615	18.6535	18.9261	18.6947
TLN1	A0AAA9RW41	86	19.1777	19.0285	18.4672	18.9022	18.6608	18.4131	18.5572	18.5727
LOC112446454	A0AAA9SHV4	3	12.9632	12.9722	13.088	13.0499	13.0342	13.2516	13.6551	12.6883
CBR4	A4IFA7	9	16.421	15.7608	16.9587	16.3642	16.5898	16.8386	16.6664	16.4028
EFHD2	A5D7A0	8	19.015	19.0864	18.6982	18.7185	19.3087	19.1166	19.0747	19.0029
EFHD1	Q17QM6	4	14.5401	14.6769	14.1049	14.4351	15.0162	14.9886	14.2987	14.5327
ARID1A	A0A3Q1M2B9	23	17.4359	17.3382	17.6329	17.4705	17.3462	17.4694	17.1943	17.328
BLOC1S4	Q0VCC3	4	14.7873	14.5406	15.0961	15.3425	15.0773	15.2315	15.3223	15.0873
GYS1	A0AAA9RZE5;A7MB78	19	16.5545	16.4754	16.4882	16.9606	16.815	16.8971	16.7136	16.7837
TRAPPC11	A6QLC7;A0AAA9RYM0	19	15.9812	15.9829	16.3125	16.0708	15.9837	16.0137	16.0379	16.11
ACAD10	E1BGS2	26	16.8064	16.2083	17.1137	16.829	17.0546	17.1624	17.1591	16.9578
TTC5	F6QA20;Q0P5H9	12	14.568	14.6613	14.4521	14.5082	14.4722	14.4192	14.5063	14.5636
STIP1	A0A3Q1MJH4;A0A3Q1LW78;Q3ZBZ8	24	19.6551	19.8338	19.8082	19.8399	19.9039	19.8292	19.8823	19.9268
MSL1	A0A3Q1N7Z0	2	14.044	13.2444	13.7091	13.0389	NA	13.3571	NA	13.4747
UNC119B	E1BIZ3	4	15.7225	15.952	16.1379	15.8416	15.6195	15.4445	15.4395	15.3388
RFC1	A0A3Q1N5S1	14	15.7677	15.6662	15.6968	15.5416	15.7729	15.5627	15.4656	15.3275
ANK3	A0AAA9RXF1	41	17.4621	17.2217	17.1352	17.5034	17.4633	17.4206	17.4277	17.4215
NUMA1	F1N7I5	98	20.3861	19.8836	20.1854	20.0591	19.9775	20.0021	20.0599	19.9824
CTNND1	A0A3Q1M1Q5	35	18.5268	18.4422	19.0647	18.7326	18.4527	18.5919	18.7467	18.8476
GADD45GIP1	A1A4P4;A0A452DIN1	4	15.3227	15.6013	16.5942	15.1085	14.8653	15.149	15.2703	15.5734
RBM39	A0A3Q1LWZ4	11	17.9754	17.754	17.7733	17.7886	17.8345	17.7868	17.6737	17.6932
SEC16A	F1N6K7	37	16.5591	16.3397	16.5056	16.6621	16.4942	16.5592	16.3782	16.5105
TF	A0AAA9U1B9;Q29443	46	22.9075	23.6881	22.3268	23.4186	23.6992	23.7267	23.381	23.3083
LAP3	P00727	27	18.1074	17.7662	17.8411	18.3643	18.2351	18.04	18.1177	18.3985
TRIM25	A6QLA8	26	17.6115	17.5432	17.6105	17.7121	18.0779	18.0076	18.026	18.0312
MTMR14	A0AAA9T6E4	3	14.5084	14.4592	14.5016	14.3299	14.7043	14.1794	14.4217	14.4873
COPB1	A0JN39	41	18.0867	18.1324	18.1482	18.0107	17.9775	17.9746	17.9319	17.9848
ITIH4	F1MMD7;Q3T052	30	19.1911	19.9254	19.2843	20.1552	20.6596	20.739	20.2239	20.2725
SEPTIN11	A2VE99;A0A3Q1MUN6	9	19.0494	18.6232	18.5271	18.6683	18.5518	18.2791	18.4331	18.2886
PKP4	A0AAA9SJ44	19	15.4574	15.3803	15.9671	15.6567	16.0927	16.1068	15.6203	15.4446
TTC4	A0A3Q1MJG1;Q5EA11	6	14.1466	14.4265	14.3556	14.4659	14.7445	14.5826	14.6641	14.6828
MECP2	A0AAA9TXS8	24	18.1762	17.9981	18.1834	17.6705	17.8406	17.9063	17.9139	17.7808
RAB3GAP2	A0AAA9T768	19	18.2959	18.1375	18.3862	18.2896	18.1584	18.209	18.29	18.3805
IRF2BP2	G3MXD0	9	15.6001	15.2444	15.4255	15.3189	15.4104	15.3733	15.1964	15.4418
SYNE2	F1MF78	232	17.6859	17.2189	17.5586	17.8618	17.8024	17.8565	17.6986	17.6031
MARCKSL1	Q0VBZ9;A0AAF6ZP66	2	18.2887	18.3036	17.7187	17.9946	18.3359	17.7804	18.0947	17.6657
BAG3	F1MIU2	23	17.3703	17.1383	17.1557	17.1024	16.9591	16.6776	17.0353	16.9375
PPOX	P56602	12	15.3109	14.9665	16.1706	15.5821	15.4872	15.6681	15.8946	15.5035
NDUFV2	P04394;A0AAA9SEY3;A0AAA9TZL3	8	17.6503	17.3382	18.5572	17.4291	17.7576	18.084	18.2483	17.8146
PFKL	A1A4J1	21	18.3605	18.5778	18.7669	18.287	18.0513	18.0326	18.2943	18.4146
DCP1B	Q3SZL6;F1MLY3	8	14.7417	14.2641	14.6757	14.5092	14.4394	14.1707	14.3085	14.064
CD248	E1BC38	5	16.2525	16.6236	16.0963	16.1589	16.1085	15.639	16.1734	15.9159
NOS1	A0A3Q1MAN5	26	14.9056	13.4118	14.8602	14.2714	14.7744	14.5151	14.6393	14.4315
FBLIM1	A0AAF6Z5Y5;Q1JQB5	9	15.7204	15.5089	15.1832	15.3957	14.7487	14.6808	14.5117	15.0014
DIP2B	F1MLE1	24	15.7776	15.5796	15.9072	15.7885	15.8355	15.7973	15.6367	15.8912
MTHFD1L	A0AAF6ZL73;Q0VCR7	21	16.4268	15.8306	17.1873	17.0346	16.7285	16.8593	16.8723	16.6921
HDLBP	A0A3Q1NND0	37	16.7744	16.9612	16.651	16.5736	16.2962	16.3497	16.2632	16.4308
NEK7	A0AAA9SNU1	10	15.5748	15.7052	15.3545	15.1741	15.3228	15.2303	15.2651	15.17
LCP1	F1MYX5	26	19.616	19.6587	19.6865	19.7836	20.1509	20.0864	19.9524	20.0467
GLOD4	A0AAF6DM94	12	19.7798	19.7783	19.8019	19.4705	19.8657	19.8097	19.7953	19.8522
GYG2	A0AAA9T701	6	15.7146	15.7855	15.4798	16.3037	16.5604	16.4185	16.0609	15.9585
UBE3A	A4IFN7	23	16.6918	16.668	16.5972	16.9246	16.7012	16.466	16.5733	16.5829
DAGLB	F6RA94	6	13.4031	NA	14.8856	13.6712	14.7657	14.6189	14.6998	14.5204
RNF169	J9JH84;F1MRW8	4	14.5378	NA	14.4987	14.1973	14.6753	14.4899	14.3623	14.5653
TPM3	Q5KR47	2	19.8426	19.8822	19.2179	19.686	19.8996	19.7004	19.8369	19.7376
PACSIN2	Q1RMR9	15	17.6663	17.766	17.3045	17.7657	17.7335	17.6417	17.8181	17.8706
RBBP6	A0AAA9RXX2	12	15.0104	14.8576	14.9177	14.8078	15.1745	14.9742	15.0083	14.9972
IFI44	A0A3Q1M1V5	9	15.7356	15.3789	15.1811	15.9532	17.7345	17.9286	18.293	18.2161
PRKCD	F1MZX0	17	16.3212	16.4812	16.2438	16.3024	16.6797	16.4053	16.748	16.7899
HDHD2	Q3ZCH9	9	16.4675	16.8318	16.6964	16.9061	16.4957	16.3925	16.3491	16.5163
CSE1L	F1MWN1;A5D785	36	17.9968	18.0066	17.8837	17.8974	17.7976	17.7917	17.9116	17.9527
MAGI3	E1BM96	9	14.4388	14.3528	14.9865	14.1545	14.2093	14.3986	14.7701	14.82
TTR	O46375	5	15.824	16.5526	16.3481	15.8564	16.7001	16.9932	17.1701	16.27
CDC73	E1BPQ8	18	17.9821	18.0394	18.1181	17.9892	18.0708	18.1369	18.0546	18.0603
DUSP3	A7YY43	6	15.4528	15.4152	15.3709	15.347	15.5315	15.4912	15.3879	15.6211
VDAC3	A0A452DIJ5;Q9MZ13;A0A3Q1M0L2	10	18.7114	18.952	19.8622	19.189	19.2126	19.4379	19.7637	18.9815
SERPIND1	F6R4P6	18	20.3157	21.2482	20.1057	20.9069	21.0798	21.0883	20.6464	20.6668
EIF2B5	E1BPB3	10	16.2558	16.1504	16.289	16.4607	16.3947	16.3345	16.3543	16.1892
PRPF3	F2Z4C4;Q2KIA6	13	15.8415	15.5077	15.7215	15.5961	15.4632	15.5781	15.6017	15.6108
MIA3	Q0VC16;A0A3Q1M2R2	18	15.2495	15.4525	15.7209	15.4227	15.2619	15.3553	15.5465	15.3808
CAND1	A7MBJ5	41	18.881	18.7595	18.5664	18.8704	18.8644	18.7089	18.8183	18.8686
F5	F1N0I3;Q28107	12	13.1055	14.032	13.5123	13.2959	13.8507	13.7563	13.5102	13.7067
ATP2C1	P57709	7	13.7653	14.6761	14.852	14.368	14.3546	14.7261	15.0594	14.685
TP53BP1	E1BDS6	34	16.2484	15.843	16.0648	16.182	16.0578	16.0676	16.0668	16.064
RCN1	G3N2L2	15	19.8543	19.3331	19.2811	19.8695	19.4118	19.3405	19.4001	19.9351
SRPK2	A0A3Q1NBC4	10	15.5784	15.625	15.1194	15.6823	15.4783	15.4627	15.4578	15.6096
AP2A1	A0A3Q1LVF9	28	19.2153	19.2018	19.1341	18.9688	19.0078	18.8724	19.0778	19.1034
BCAT2	Q5EA40;A0AAF7ADA8	8	15.9491	15.843	15.7702	16.1876	15.9258	16.3054	16.1971	16.4206
PPP1R12C	A0A3Q1LWP2	11	15.5564	15.3223	15.3556	15.5497	15.3561	14.9935	15.4322	15.313
TBC1D4	A0AAA9SG49	30	15.7308	15.2496	15.8361	15.8397	15.4674	15.3759	15.6247	15.8377
YBX1	A0AAF6Z3R0;P67808	6	18.4595	18.9346	19.1318	18.7351	18.734	18.8786	18.8729	18.7874
DST	A0AAA9S4P4	26	16.072	15.9082	15.9975	15.8337	15.577	15.3721	15.2703	15.0907
TTC38	A0A3Q1M6S8	22	17.4976	17.1143	16.9598	17.4953	17.4425	17.2037	17.2227	17.4479
BOD1L1	A0AAA9T5M5;F1N2T2	24	16.8345	16.7327	16.8978	16.7858	16.9841	16.9821	16.8474	16.9381
TOE1	Q17QN2	9	15.1774	15.5068	14.9285	15.3178	14.965	14.9103	15.1225	15.2106
AP3M1	F2Z4I2;Q24K11	9	16.0281	16.1594	15.8621	16.1115	15.9673	16.0388	16.0257	16.1138
MOCOS	Q9N0E7	19	16.1271	15.7238	16.4227	16.1269	16.2688	16.1613	16.469	16.6547
TMEM102	Q1LZD1	3	12.4474	12.376	12.5633	12.4808	12.1656	12.5076	12.5012	12.8802
KIAA1671	E1BC55	27	16.1983	16.5665	17.1236	16.2673	15.952	15.9659	17.027	16.9802
EPS8	A0A3Q1M2P8	32	16.8968	16.929	17.5951	16.8896	16.8675	16.8388	17.13	17.0364
ADK	A0AAA9TAD8	15	18.1582	18.2167	18.0153	18.3105	18.3577	18.4478	18.3195	18.4189
TMEM231	A7MB75	4	14.3043	14.1046	15.2802	14.1822	14.3954	14.6535	14.6314	14.1007
CROCC	E1BBS9	29	15.802	15.2591	15.6485	15.6901	15.5633	15.712	15.5958	15.7094
ENPP1	F1MNS5	29	17.2315	16.433	17.4267	17.7925	17.8931	17.9485	17.9027	17.3183
DHX9	Q28141;A0AAF6Z733	48	19.5011	19.3074	19.2534	19.249	19.3196	19.4179	19.2817	19.3016
PM20D2	G3X6X9	7	14.5317	13.5487	14.1556	14.4112	14.1059	14.0231	14.3133	14.3358
PTMA	A0AAF6YK23;P01252	5	20.0985	20.1175	20.1994	19.9847	20.1341	19.7671	20.0467	20.0218
NCKAP1	F1MPZ9	35	18.3884	18.1374	18.04	18.2466	18.3546	18.2919	18.2307	18.2299
APBA1	F1MYC3	5	14.1235	13.8428	13.9426	14.7725	13.8486	13.9437	14.6313	14.7801
WDR70	A0A3Q1LXS9;Q32LB0	12	16.6879	16.5759	16.4883	16.6028	16.8347	16.5565	16.3791	16.5309
PCCA	A0A3Q1LYL5	33	17.7768	17.5179	18.4397	17.9119	18.4407	18.6291	18.2491	18.0118
TAGLN	Q9TS87	17	20.7219	21.2517	20.7798	21.9868	20.8446	20.7142	20.6225	20.7
CLASP1	E1BGU2	20	15.5106	15.5265	15.4881	15.3374	15.4653	15.3006	15.5319	15.605
PRKDC	E1BLB6	25	15.4814	15.6329	15.4814	15.3492	15.0112	14.7969	15.2581	15.2784
PTMS	A0A3Q1MEU1;P08814	4	18.4134	18.5857	19.8191	18.2268	19.1279	18.7761	18.4109	18.5124
ANK2	A0AAA9T728	17	17.4011	17.4002	17.3488	17.549	16.6592	16.7001	17.2567	17.3078
NXT2	A6QNX3	3	16.2269	16.5872	16.5913	16.4823	16.4284	16.3495	16.6387	16.8893
AKAP9	A0A3Q1MK49	101	16.3609	16.3873	16.8609	16.5959	16.7991	16.9829	16.7671	16.8442
HNRNPUL2	E1BNQ9	29	19.3369	19.1583	19.1494	19.001	19.1081	19.2062	19.0941	19.1512
ACACA	A0A3Q1N1M4;Q9TTS3;A0A3Q1NJE5	49	16.0326	16.601	17.0544	16.3266	16.2417	16.0939	16.4169	16.5407
SVIL	A0AAA9SUN6;O46385	27	15.8015	15.6741	15.7664	16.0402	15.7399	15.7166	15.715	15.7633
TNS3	A0A3Q1NEL1	27	15.9488	15.8182	15.8362	15.7878	15.5822	15.4128	15.7493	15.7953
TGFBR3	A0A3Q1M0W4	16	16.3517	16.7811	16.5268	16.7445	16.5445	16.7188	16.8793	16.4538
TMED8	E1BNI6	9	15.6215	15.0494	15.3283	15.5738	15.981	15.7376	15.4653	15.6121
RELCH	A0A3Q1M6S1	24	15.1554	14.876	14.8882	15.0482	15.0478	14.9106	15.2712	15.3053
IFT140	E1B860	20	15.7672	15.5429	15.8375	15.7299	15.6889	15.8266	15.6822	15.5755
PIK3CB	F1MYM3	10	14.2954	14.3704	13.8177	14.4407	14.3169	14.1531	14.1967	14.3768
XAB2	A0AAF6DMF4	20	15.4408	15.24	15.2626	15.1122	15.2347	15.3218	15.1123	15.2003
DNAJC17	Q2KI83	9	15.1102	14.8462	14.9183	14.9599	15.2162	15.0618	14.8958	14.9134
PFDN2	A0AAF6Z7N5;A1A4P5	6	17.5282	17.6113	17.6511	17.7653	17.582	17.5603	17.768	17.7857
SKIC3	A0A3Q1M8Y4	41	16.7078	16.5601	16.435	16.6884	16.4687	16.2983	16.4627	16.4078
PRPF6	A0AAA9S435;Q2KJJ0	30	17.9089	17.6613	17.8065	17.5259	17.6087	17.6333	17.5658	17.7045
LRRC1	A0A3Q1LTV0	11	14.5756	14.7546	15.0913	14.6911	14.7525	14.901	14.979	14.9187
PHB1	Q3T165;A0AAA9SMG6	16	19.9913	19.9551	21.1576	20.1518	20.1536	20.3188	20.7001	20.3036
PCID2	A0A3Q1MVQ2;Q2TBN6	15	15.6707	15.8416	15.6538	15.6644	15.8228	15.9091	15.6516	15.739
MSTO1	A5D9D4	6	14.643	15.2218	14.8568	14.7143	14.7742	14.7921	14.9693	14.8719
SCLY	A2VDS1;A0AAF6YVB5	14	16.8014	16.9796	16.6204	16.9137	17.2473	17.0206	17.1275	17.0341
SYVN1	E1BAK9	3	14.0905	14.1701	15.0015	14.5752	14.7766	14.9931	14.6377	14.3837
ECI2	A0AAA9TZC7	17	18.4824	18.1327	18.729	18.8069	18.8623	18.9941	18.9334	18.7812
SLC7A6OS	Q1JQE2	3	15.2367	15.5258	15.0247	15.3397	15.2911	15.1247	15.4803	15.4368
ZC3H4	A0AAA9SY77	13	16.0609	15.8338	15.8784	15.9377	15.8154	15.7414	15.9478	15.9272
SUPV3L1	A0AAF6DLT1	13	15.0901	15.1665	15.9501	15.2533	15.6137	15.4458	15.7781	15.5096
KMT2D	A0A3Q1LM54	6	13.914	13.6908	14.3084	13.7069	13.6216	14.0311	13.6952	13.8799
NEMF	A0A3Q1MSI2	10	14.6368	14.7055	14.722	14.6306	14.6925	14.6329	14.7102	14.7037
ACSS3	A7MB45	18	18.0034	17.4817	18.4874	18.0786	18.3084	18.5245	18.7128	18.4088
FKBP4	Q9TRY0;F1MU79	33	19.9367	19.7901	20.2784	20.075	20.1089	20.0526	20.1936	20.2177
FAM98B	A0AAA9T5P2	13	18.6047	18.2229	18.047	18.5241	18.3542	18.2301	18.1772	18.3762
RC3H1	A0A3Q1M2R1	3	15.0659	15.1526	14.9371	14.9134	14.674	15.0596	15.1271	14.8279
OXCT1	Q24JZ7	18	18.0067	18.1253	18.9207	18.3866	18.2082	18.4282	18.3287	18.21
DYNC2H1	A0AAA9TWT4	72	16.3193	16.2487	16.3014	16.3787	16.2595	16.4346	16.1088	16.0974
TEPSIN	A0A3Q1MCN3	5	13.125	12.974	13.4193	13.0225	12.8649	13.0471	13.4797	12.8093
GALNT12	A0A3Q1N2Q7	4	14.1387	14.5787	15.0778	14.6066	14.7071	14.7205	14.8187	14.797
SARM1	E1BIR9	9	15.0366	14.8586	14.4372	14.9026	14.9026	14.0699	14.1963	14.1294
NECAP2	A0A452DJD5;Q5E9Q4	7	16.9916	17.1039	17.3033	16.812	17.071	16.8509	16.9776	17.0072
FLII	F1N365	36	16.6963	16.5961	16.9174	16.558	16.8236	16.862	16.9361	17.0024
COL6A1	E1BI98	29	17.7929	17.8565	17.6801	18.174	17.7675	17.0525	17.8114	16.8938
CEBPB	A0AAA9TD00;O02755	7	16.8033	16.1141	17.0334	16.9361	17.321	17.5911	16.6467	16.4773
AQR	A0A3Q1MP16	33	17.3978	17.3743	17.4255	17.1707	17.1275	17.1877	17.1045	17.2374
YWHAE	P62261	17	22.9404	22.9765	22.5837	23.0016	23.1689	23.0929	23.076	23.0803
LMAN1	A0A3Q1MSA1	9	16.8134	16.9142	17.3336	17.23	17.2182	17.5187	17.5526	17.0014
SRRM2	A0A3Q1M0D6	26	17.2888	17.2147	17.2841	17.2425	17.2554	17.2603	17.2864	17.2969
SDHA	P31039;G3MY67	23	18.4708	18.3104	19.2833	18.4978	18.7564	18.9541	18.8601	18.6168
DPYD	F1N549;Q28007	22	15.6126	15.3671	14.8759	15.5804	15.0989	15.0993	14.754	15.2722
ITIH5	F1N1Z6;A2VE29	14	14.9732	14.7733	14.2723	14.2285	14.0818	13.4972	14.1948	14.0736
NUP133	F1MM55	23	16.6587	16.4212	16.4976	16.4355	16.4814	16.5753	16.1955	16.2878
GOLGB1	A0AAA9SMB5	59	19.08	19.4521	19.5979	19.2912	19.379	19.5418	19.5515	19.4945
HDHD5	F1N6K5	8	14.7201	14.4301	15.3536	14.7103	15.0641	15.1336	15.3169	15.1787
UGGT1	A0AAA9TE87	39	17.3232	17.2685	17.4923	17.2612	17.178	17.2102	17.3573	17.274
ALDH2	P20000	19	20.7671	20.2954	21.3107	20.7831	21.2994	21.3161	21.3694	20.9973
COMMD3	F1MUK6;Q3SZ76	9	16.2746	16.2258	16.0126	16.2215	15.9266	16.0038	15.9618	16.0787
CHCHD4	Q2KHZ4	3	14.8677	14.973	15.4711	14.6432	14.8036	14.8289	15.1579	15.0574
ACSF3	Q58DN7;A0AAF7AST6	17	13.7753	13.8652	14.0922	14.0224	13.8223	14.1699	14.6497	14.2759
SRM	E1BM12	11	16.8119	17.4902	16.3565	16.535	16.746	16.6567	16.7374	16.8562
ITGA3	F1MMS9;A0A452DIV7	14	14.7051	14.9597	15.4508	15.097	15.3626	15.4605	15.212	14.8243
SMARCD2	A0AAA9RZX6;E1BJD1	11	15.6699	15.5031	15.6321	15.5158	15.3943	15.5582	15.3505	15.4768
CNP	P06623	14	17.5674	17.4928	17.3051	17.7068	17.8685	17.8799	18.0392	17.9238
NHSL3	A0A3Q1MXQ4	10	14.7788	14.1782	14.8636	14.7695	14.9745	14.7748	14.8092	14.8434
TERF2	F1MMS4	11	15.6685	15.1818	15.3157	15.2607	14.9482	15.2168	15.0917	15.199
RIDA	Q3T114	7	18.8465	19.042	18.7179	18.756	19.2723	19.334	19.2034	19.3923
DERA	Q3T0V9	12	16.8214	16.8235	16.5102	16.6783	16.7767	16.8054	16.7755	16.8318
SUN1	A0AAA9U142	14	14.8356	14.7332	15.1031	15.5753	15.2997	15.1658	15.5576	15.2662
STK4	Q5E9L6;A0A3Q1MLJ1	12	16.4875	16.6248	16.8391	16.8332	16.9342	16.8974	16.8038	16.9263
KTN1	A0A3Q1LVS2	62	17.5182	17.362	17.8274	17.6088	17.6982	17.8405	17.8191	17.764
RIGI	A0AAA9TED6	26	15.5569	15.3624	15.0121	15.0699	17.7685	17.7047	17.0894	16.9447
SHPK	A0A3S5ZPP1	13	15.634	15.522	15.5798	15.0388	15.8984	15.7074	15.6204	15.4792
GART	Q59A32	31	16.5879	16.958	16.6578	16.862	16.8777	16.7049	16.8279	16.9173
GOLPH3	Q1RMW9;A0AAA9S7T6	8	16.1049	16.1091	15.8743	16.0567	16.0012	16.1356	15.9388	16.158
PGM5	A6QNJ7	27	19.1433	19.2061	18.8472	19.1814	19.2651	19.0209	18.9616	18.5813
INF2	A0AAA9SIE1	19	15.3332	15.415	14.8836	14.7423	14.7924	14.694	14.8253	14.7374
SF3B1	F1MX61	43	17.8096	17.7419	17.859	17.6048	17.5198	17.687	17.5582	17.644
ALG3	F6QW25	2	14.0257	14.4965	15.3849	14.7239	14.5393	14.9328	14.915	14.6076
COL15A1	A0A3Q1MUA3	16	18.0706	18.0265	17.8537	17.5992	17.1987	16.7687	17.6577	17.3897
ERC1	A0A3Q1LTK7	19	16.684	16.5308	16.1118	16.4527	16.3626	16.0378	16.3004	16.1649
TARS2	A0AAA9S7D5	8	15.4055	15.688	16.0281	15.6413	15.7781	15.9539	15.6765	15.6473
MAST4	E1BH93	5	12.7677	12.9396	13.015	NA	13.0287	12.5136	13.2016	12.7571
PARP14	F1ML90	11	14.3007	13.9191	14.4145	14.2803	15.6184	15.3917	15.4103	15.068
MAP4	A0A3Q1M9W4;P36225	35	19.193	18.9429	18.7699	19.0114	19.0072	18.7408	18.8358	18.8162
MACROD1	Q2KHU5	7	16.0433	15.9897	15.6889	16.0734	16.2821	16.4503	16.1342	16.1979
OPA1	A0AAA9S306	33	15.6879	15.8068	16.5018	15.7913	15.8139	15.9214	16.2883	16.1201
FLNB	A0A3Q1MQ34	103	19.9805	20.0336	19.8426	19.8071	19.71	19.6009	19.8447	19.882
CNOT3	E1BCS1	8	15.5774	15.3516	15.5016	15.5909	15.6619	15.4553	15.5594	15.6169
MRPL2	Q2TA12	4	14.1413	15.0011	15.7457	14.0767	14.3827	14.8507	14.6972	14.6941
JAGN1	Q2NKY9	3	16.839	16.4864	17.3652	16.9753	17.3049	17.2413	17.5067	16.874
UBXN6	Q2KIJ6;F1MES6	13	15.5129	15.593	15.1739	15.5889	15.4885	15.3568	15.182	15.3523
MICU1	Q0IIL1	7	15.038	14.9069	15.5494	15.0875	15.0848	15.1712	15.3148	15.0356
KPNB1	E1BFV0	31	18.9034	18.9729	18.7654	18.8669	18.9865	18.8608	18.835	18.8583
HSPG2	A0AAA9TDR0	102	17.018	18.1613	16.8142	17.0924	16.4287	15.8953	16.8821	16.6889
RUVBL2	F1MSD2;Q2TBU9	20	17.9815	17.7426	17.8006	17.7308	17.9174	17.9091	17.9026	17.8502
TMEM43	A0AAA9S182	16	16.5514	16.4148	17.1744	16.9428	17.0485	17.1066	17.1977	16.6901
TXNDC15	A0AAA9TYR8	3	16.2515	16.0034	16.5881	16.1567	16.3667	16.7362	16.4905	16.1406
PRRC2B	A0A3Q1LY98	4	14.1445	13.8195	14.4056	14.1951	14.4222	14.3334	14.2443	14.0905
IPO4	A0A3Q1N3C7	28	16.9125	16.9159	16.9575	16.5966	16.7131	16.5115	16.7209	16.7009
RARS1	A7YW98	35	18.3278	18.3666	18.3773	18.2974	18.4	18.3583	18.3805	18.3376
MYO1B	A0A3Q1MR81	27	15.9902	16.0571	16.3074	15.8774	15.9733	16.1525	16.2765	16.2604
PA2G4	Q3ZBH5	19	18.4197	18.4339	18.3416	18.3031	18.4975	18.5133	18.6188	18.6181
LOC107131209	A0AAA9S3H4	26	20.8347	21.1535	20.4622	21.1759	22.0949	21.9782	22.0536	22.1131
RAF1	A7E3S4	5	14.4828	14.425	14.6547	14.5671	14.4346	14.3089	14.1959	14.2408
STXBP1	P61763;A0AAA9TPJ7	23	16.6564	16.4579	16.6339	16.8575	16.7927	16.6326	16.4463	16.4723
STXBP2	F1MHC2	19	16.6804	17.0807	17.0426	16.6402	16.9128	16.9154	17.1432	17.1431
SMU1	A0AAF6Z1S7;Q2TBS9	14	17.3284	17.117	17.0354	17.1816	17.0974	17.1526	17.1881	17.2732
CIC	G3MX46	11	17.5183	16.8171	17.1472	17.1708	17.3151	16.8588	17.2733	16.9681
TNS2	A0A3Q1MBB1	29	19.1633	18.8764	18.4852	18.9909	18.6651	18.6401	18.8529	18.7451
FUS	A0A140T861;Q28009	7	18.8045	18.6933	18.71	18.7584	18.6443	18.5509	18.5722	18.5154
ATP11C	A0A3Q1LWW8;A0AAA9RSX8	2	13.0501	13.8727	13.6876	13.3771	13.5195	13.6917	13.9487	13.3825
FOCAD	A0AAA9TVP1	21	14.7059	14.7323	14.9563	14.7028	14.5402	14.5492	14.6298	14.7691
PIGG	A0AAF6DLK5	6	13.3577	13.6452	14.6446	14.0179	13.8914	13.968	14.1104	13.6484
HEATR1	F1MDU9	28	14.8606	14.8171	15.1559	14.7259	14.666	14.921	15.0044	14.9882
NPEPL1	A0AAF6DME4	15	16.2071	15.9766	15.9172	16.1602	16.1608	16.0306	15.872	16.132
TDRKH	F1MUI1	4	13.2853	13.1979	13.5777	13.1673	13.4183	13.4862	12.8485	13.1947
EIF4G3	A0A3Q1M1I5	20	17.1255	17.3212	17.3203	16.9149	16.8449	16.7589	17.0785	17.1279
PRMT5	A0AAA9TZG3;A7YW45	14	17.1218	17.0891	16.9677	17.1768	17.1814	16.973	17.0721	17.0758
TTC39B	A0AAA9S0I4	8	13.7096	14.0043	14.7464	13.6432	13.8223	13.716	14.1636	14.4764
NPRL3	F1MMI3	3	14.2938	14.0836	13.9036	14.0675	14.0632	14.0452	14.302	14.0157
MIEF1	E1BIT2	5	14.4412	NA	15.2136	14.7478	14.4003	14.5231	14.4806	14.6311
CYP27A1	F6QQE8	21	17.8868	17.4344	18.2385	18.213	18.194	18.5198	18.5555	18.3606
EXOC3	Q0V8C2	15	15.854	15.7567	15.8389	15.8577	15.7213	15.6368	15.7024	15.7015
ITIH1	Q0VCM5;A0A3Q1LVM5	30	18.4752	19.1633	17.517	19.0514	19.5996	19.5781	18.7645	18.8047
FYCO1	A0A3Q1M133	29	17.3993	16.8518	16.8429	16.944	17.0857	16.8849	16.9098	16.9536
VPS35L	A0AAA9TRE2	30	17.7292	17.6359	17.6292	17.6163	17.6757	17.4524	17.5653	17.535
RAB24	F6Q1G9	9	15.7634	15.6604	16.8334	15.6852	16.0684	16.241	16.7139	16.1897
TTLL12	Q08E58	22	17.9078	18.0576	17.7554	17.9733	18.0659	17.8737	17.8814	17.8714
FARP1	F1MFC6	28	16.7582	16.5539	16.8543	16.5876	16.6802	16.5983	16.7275	16.714
INTS14	Q5EA76	2	13.6833	NA	13.288	13.9089	NA	13.784	13.782	13.4769
DPYSL3	A7MBI5	29	20.1606	19.9418	19.9237	20.1558	19.8713	19.4933	19.4089	19.3188
DPYSL2	O02675	20	20.2362	19.9241	19.8455	19.9869	19.8565	19.7305	19.6219	19.595
DPYS	A0AAA9SBH6	3	12.7642	NA	13.7045	NA	12.9382	13.0158	14.0265	13.302
PLEC	E1BF59	207	18.8713	18.5181	18.4296	18.617	18.8061	18.8898	18.6638	18.599
CLEC11A	A5D7L1	2	13.2464	14.1351	13.7499	NA	13.7382	13.5631	13.6281	13.5279
SHANK3	G3X7B4	2	13.3872	13.1971	12.9903	13.3848	12.9619	13.1365	13.3261	13.0112
BAZ2A	A0AAA9SS13	4	13.5763	14.4846	14.624	13.2835	13.4528	14.0266	13.8731	14.3022
NAPA	P81125;F6Q334	17	17.3639	17.4121	17.2809	17.1895	17.3502	17.486	17.3174	17.3509
ARHGAP17	F1N458	14	17.7612	17.6249	17.6935	17.6066	17.6233	17.5229	17.7142	17.7887
HPGD	Q3T0C2;Q309F3	11	18.4026	17.8787	17.6259	18.4658	17.3958	17.5139	17.8458	17.8017
NATD1	A6QL79	2	13.5658	14.1021	13.9334	13.8252	14.169	13.9897	NA	13.6085
H6PD	A0A3Q1LRN7	20	17.106	17.0795	17.3251	17.1846	16.7653	16.6902	16.749	16.7175
QDPR	A0AAF6ZJM9;Q3T0Z7	10	18.9259	18.828	18.6542	19.0562	19.2418	19.0845	19.0925	19.166
DCHS1	E1B969	45	17.1423	16.9375	16.761	16.7124	16.6605	16.1223	16.5399	16.3308
PHKA1	A0AAA9SIN1	7	14.5687	14.7283	14.9124	14.8761	14.8123	14.8063	14.3794	14.8103
SHMT2	Q3SZ20;A0AAA9TQ60	18	16.6735	16.9347	17.3417	16.8706	16.885	17.0113	17.236	17.0656
ACAP2	A0AAA9TC46	12	15.3511	15.0916	14.8424	14.9926	14.8556	14.736	14.849	14.8926
XRN2	F1MKX7	22	17.43	17.2601	17.4288	17.3008	17.4426	17.4847	17.5071	17.7293
KRT19	A0AAF6YMV1;P08728	16	22.6061	23.2663	22.4505	22.6689	22.7977	23.0274	22.304	22.4656
SAMD4B	E1B893	5	15.748	15.3251	15.1599	15.5491	15.7477	15.6013	15.3499	15.4421
SNRNP200	E1BH78	84	17.8751	17.6515	17.8617	17.6075	17.6244	17.6972	17.7179	17.7165
PRXL2A	Q3ZBK2	11	20.0804	19.4659	19.7599	19.7711	18.1837	18.2481	19.3444	19.0777
SFSWAP	A0A3Q1LYZ4	9	16.0694	15.8413	15.8473	15.8032	16.1466	16.2328	15.9919	16.1735
EPPK1	A0A3Q1LMV9	67	17.7307	18.2423	18.4563	18.0165	17.8457	18.0184	17.7612	17.8956
PI4KA	A0A140T888;O02811	34	15.6046	15.2544	15.0445	15.2822	15.192	15.0241	15.2168	15.0217
C8A	F1MX87	18	17.3411	17.6009	17.0984	17.7015	17.9959	17.9254	17.4341	17.259
RARRES1	Q0P5D6	2	13.2747	13.8003	13.5686	12.1306	12.8102	13.0734	12.2899	12.2204
ZNF706	A0A3Q1MFB7	2	16.9278	16.7969	16.7063	16.6319	17.084	16.9527	16.8113	16.8148
ELAC2	E1BDK7	18	15.4337	15.0173	15.1728	14.8159	14.9269	14.8742	14.6592	14.5917
UAP1L1	A0AAA9SCV4	17	16.5246	16.311	16.2581	16.2719	16.5189	16.5696	16.7658	16.6987
RBM33	E1BNF0	3	13.7583	13.2621	13.3901	13.6739	13.4102	13.5827	13.4513	13.5744
SPTAN1	A0AAA9TJI4	132	19.1251	18.6146	18.7593	18.8955	18.7489	18.6416	18.7716	18.5869
NOL11	Q3MHH2;A0AAF6Z211	7	13.799	14.2598	14.5141	13.9259	13.9757	14.159	13.8679	14.1142
FHOD1	G3MYQ1	14	15.2315	15.0042	14.7668	14.9462	14.6961	14.5342	14.7694	14.6976
EPRS1	A0AAA9TMZ2	56	17.8409	18.0211	18.0556	17.9382	17.807	17.7083	17.9063	17.8459
WWC1	F1N3I6	4	15.3255	15.2366	15.7161	15.2399	15.5306	15.1768	15.3911	15.4155
CDK13	E1BB52	3	13.1293	12.7949	13.3253	13.2325	13.2878	12.8113	13.2562	13.2367
TOR1AIP1	F1N4E5	17	16.1678	16.14	16.2918	16.1788	16.2255	16.0974	16.6463	16.33
ALDH16A1	A0AAA9TSB3;A6QR56	13	16.9145	16.8936	16.5384	16.8042	16.8679	16.8271	16.8187	16.9441
PPP2R5B	Q08DP7	6	14.1572	14.42	13.7668	13.8303	14.4116	14.4263	14.2661	14.1822
HNRNPLL	F1N7G0	16	16.5605	16.507	16.2633	16.5022	16.4515	16.4741	16.4313	16.5111
POLR1A	E1BIX2	9	16.2309	16.0795	16.4734	15.9411	15.926	16.0392	16.0833	16.4288
RHPN2	A4FUC9	25	16.1366	16.2634	16.8279	16.1839	16.2951	16.3252	16.1973	16.3188
AMPH	A0A3Q1MHL4	8	14.735	14.1983	14.2518	15.4566	14.8581	14.2139	14.4709	13.963
ZNFX1	E1BN24	23	14.8831	14.8999	14.4509	14.8384	15.6816	15.2867	15.5709	15.456
EML4	A0A3Q1LLV8	29	16.9393	17.0713	16.5823	16.9708	16.7487	16.5442	16.7548	16.8777
HUWE1	E1BNY9	75	18.2545	18.1485	18.1397	18.078	18.0707	17.9153	17.8482	17.8113
HTT	E1B8E7	38	16.8674	16.7853	16.8762	16.8506	16.7998	16.6597	16.7841	16.7562
PTPN23	E1BIU7	33	15.9868	15.8188	15.9111	16.1242	15.8556	15.7773	15.9405	15.9722
KIF2A	Q2NL05;G3N277	15	16.0065	15.5619	16.119	16.0747	15.9627	15.8891	16.0439	16.0831
NUDT2	Q29RJ1;A0AAF6ZFU3	4	16.3541	16.79	16.5707	16.8838	16.7945	16.4505	16.2153	16.4076
RPS25	A0A3Q1MTI8;A0AAF6ZQK7;A0A0A0MPA4;Q56JX5;A0A3Q1MT40	4	19.9872	19.8485	19.6708	19.6557	19.947	20.2138	19.9462	19.9835
PAK4	A0AAF6DLY7	8	14.6415	14.6727	14.3338	14.8955	14.816	14.7973	14.6721	14.6424
AKAP13	A0A3Q1MRE3	41	15.8185	15.6001	15.5864	15.9254	15.6482	15.4372	15.6324	15.8184
TRMT5	Q3MHN8	12	16.2923	16.4208	16.3813	16.4181	16.2861	16.2902	16.3676	16.3085
FOXO3	F1N4K5	3	13.9115	13.9463	13.9815	13.9015	NA	13.4796	13.8778	13.8784
DIMT1	Q2KHT8;A0AAA9SKX4	11	15.3546	14.861	15.029	15.6145	15.3381	15.5755	15.0675	14.9017
EIF4G1	F1MX04	33	17.6848	17.7909	17.9494	17.8216	17.8313	17.8878	17.8698	17.903
LRP1	E1BGJ0	45	17.0379	16.9784	17.2099	17.1717	16.745	16.3246	17.3519	16.5895
XPO7	G3N1J2	29	16.6633	16.4903	16.3676	16.5858	16.5703	16.3595	16.4976	16.5032
GIGYF2	A0AAA9SKH3	12	14.7901	14.8097	15.3162	14.7549	14.7517	14.5907	14.8728	14.7713
UBE2O	F1N3I3	21	15.2405	15.1563	15.018	15.1591	15.4213	15.12	15.3384	15.2584
TTC39A	F1MNU0	7	14.8801	14.606	14.7116	14.7651	14.8858	14.6705	14.8325	14.9509
ISCA1	Q3SZG8	3	14.5987	14.5796	14.5556	14.7077	14.6094	14.7037	14.9598	14.5077
ME1	A0A3Q1MWC7	16	17.165	17.4403	17.1946	17.4089	17.4253	17.3485	17.4057	17.5125
GPI	Q3ZBD7;A0A3Q1MP70	19	20.1654	20.5058	20.1961	20.1701	20.2405	20.1656	20.3269	20.3821
TUBB6	Q2HJ81;A0AAF6ZEV9	6	22.5045	22.4751	22.3616	22.5447	22.5006	22.4012	22.4388	22.5274
CCDC85C	F1MZJ7	2	13.2386	NA	13.6948	NA	13.8018	14.0042	12.9292	13.3685
SLC25A27	E1BME0	7	14.7043	14.0355	15.4365	15.0025	14.8528	15.0051	15.5802	14.7872
OAS1Y	F1MV66	11	16.8227	16.1775	16.1806	16.5389	19.951	19.9969	19.9248	19.7089
IMMT	A0A3Q1MFE4	33	17.8286	18.1749	19.3909	18.2779	18.3801	18.4549	18.9639	18.2768
AMT	A0AAA9TRT8;P25285	5	14.2888	14.5705	15.1801	14.2548	14.8759	14.9776	15.0727	15.0532
PLCL2	E1BH60	4	14.3976	14.0366	14.5481	13.6953	14.1419	13.5455	14.2789	14.1829
FADD	Q645M6	4	16.6142	17.2894	17.0343	16.9346	16.7513	16.9786	16.9708	17.042
CTNNB1	Q0VCX4;A0AAF6Z2K7	23	19.0342	18.9108	19.1089	19.2845	18.8804	19.0562	19.3921	19.3583
ICMT	G3N1V4	2	12.4716	12.7651	12.7349	11.5878	12.1598	12.3157	12.2343	11.9063
PGM2	F6QEU6	26	20.5908	20.5086	20.3446	20.8183	20.7455	20.7538	20.6429	20.8642
TRMT2A	E1BMX2	17	15.9355	15.7646	15.656	15.8337	15.908	15.7894	15.7762	15.7797
JUP	Q8SPJ1	22	17.5357	17.7132	17.7064	17.8125	17.6806	17.9556	17.6691	17.7035
MYLK	Q28824;A0AAA9SS38	26	18.7949	19.058	18.6007	20.3719	18.8665	18.5514	18.4121	18.5482
HSPA12B	A0A3Q1MFK9	20	17.0475	16.8027	16.3522	16.7101	16.3438	16.2677	16.2574	16.2013
RASEF	A0A3Q1M0B9	3	NA	12.8419	13.5943	13.4991	13.1556	NA	14.1049	13.4686
RAI14	A0AAA9STV0	33	15.4117	15.0548	14.8287	15.107	14.966	14.7663	15.068	14.9999
NIPBL	E1BKC4	31	16.1885	16.1641	16.2517	16.0807	15.9763	16.0451	15.8554	16.0357
ABCF1	A0A3Q1NB13	20	16.458	16.7538	16.8061	16.5094	16.6011	16.5687	16.5967	16.7495
VCL	A0A3Q1LIB4	48	20.3286	20.4464	19.8702	20.412	20.071	19.8724	19.982	19.9553
CAMK4	A0A3Q1M5T5	8	15.323	15.472	15.3925	15.6157	15.342	15.1856	15.3796	15.1391
PSMA2	Q3T0Y5;A0A3Q1LX83	10	17.7827	17.7095	17.9497	17.7505	17.7363	17.6101	17.7754	17.8452
YES1	F6S1J8	5	15.3889	15.9353	15.3845	15.8162	15.5007	15.3511	15.4623	15.2757
FBXO22	A5PJX0	9	16.1343	16.0684	15.6902	16.1187	16.2804	16.1239	15.998	16.1871
ATP23	F1MY08	2	11.6968	12.2367	12.8411	NA	NA	NA	NA	12.369
ESR1	P49884	9	15.4638	15.3289	14.9995	15.6195	15.1129	14.8813	14.7589	14.8194
WIPI2	Q2KJ60	7	15.8897	15.7471	15.9038	15.9232	16.0715	16.093	15.9028	16.1124
CYC1	P00125	6	16.1941	16.7444	18.2463	16.6719	16.701	16.8963	17.2709	16.6518
THUMPD3	Q2T9W2;F1N027	10	16.1615	16.1398	15.8363	16.2727	16.2929	16.0886	16.0984	16.0842
RAB3GAP1	A0A3Q1MFP2	24	15.1656	15.1113	15.2184	15.1899	15.2333	15.0075	15.135	15.2846
HYOU1	A0A3Q1MBP1	33	18.4251	18.2208	18.619	18.3235	18.3379	18.3862	18.5494	18.3761
SMG8	A1A4J7;F1MZ61	6	14.0063	14.5875	14.272	14.0878	14.6881	14.6112	14.4517	14.5497
PGR	F1N712	15	15.6434	14.8565	14.6102	14.836	14.8151	14.3015	14.7799	14.785
GAMT	Q2TBQ3	7	15.4949	15.7188	15.4595	15.6101	15.4373	15.2568	15.3259	15.5734
ZNF622	F1N194	8	15.7799	15.5032	15.2262	15.2648	15.6049	15.6662	15.6244	15.8126
ACIN1	F6QIB4	13	16.7444	16.3369	16.4034	16.415	16.5582	16.5621	16.5343	16.5755
RUSF1	G3N1G1	9	15.8461	15.9004	16.3602	16.137	16.4164	16.5801	16.4689	16.2168
TRAF3IP2	A0AAA9TJ12	9	14.8125	14.3058	15.4359	14.6403	14.6773	14.9071	15.0217	15.1006
FUNDC1	F1N5S9	2	14.4337	14.378	14.7464	14.3435	14.5896	14.6618	15.123	14.4305
GCDH	A0AAF6ZG02;Q2KHZ9	7	17.1776	17.1423	17.6806	17.2218	17.2784	17.6455	17.5146	17.52
PPA1	P37980	13	17.2097	17.5788	17.5299	17.2768	17.8293	17.6953	17.8389	18.183
REPS2	A0AAA9S5X6	3	14.9998	14.5877	14.639	14.8708	14.5667	14.9226	14.4599	14.2215
NONO	Q2KJ42;A0A3Q1LXP0	17	18.9696	18.5725	18.3918	18.6748	18.5031	18.4125	18.424	18.4162
RMDN3	A0AAF6YKI7;Q1JQC5	11	18.6046	18.487	19.0285	18.8962	18.8912	18.9835	19.1524	18.7619
METTL1	A0AAF6Z3Q7;Q2YDF1	4	14.0759	14.2215	13.9918	14.0996	14.0933	14.0159	14.283	14.3015
PYGL	Q0VCM4	37	18.671	18.7434	18.2519	19.3027	18.872	18.7644	18.8527	19.0868
SARS1	Q9GMB8	25	18.018	18.215	17.984	18.1183	18.2856	18.0925	18.423	18.5112
PDK3	A0A3Q1MR25	12	16.6599	16.406	16.8856	16.2527	16.7865	17.0723	16.8384	16.8078
ZNF592	F1N5U2	9	16.6021	16.1524	16.5885	16.2254	16.5562	16.659	16.3226	16.3205
RFLNB	F1MEL7	3	14.2998	14.5749	15.9371	14.1727	13.6724	14.2257	15.079	15.1687
CHCHD10	A4IF72	2	16.3957	16.847	16.61	16.4025	15.7146	15.8666	16.9134	17.0255
NUP155	A0A3Q1M9F3	36	17.6182	17.3996	17.4586	17.3452	17.441	17.5914	17.2004	17.3596
CHCHD9	Q3ZCI0	4	17.5699	17.3684	18.1264	17.3863	17.3444	17.4569	17.5345	17.5856
SPON1	Q9GLX9	17	17.7415	18.1266	17.8113	17.938	18.2359	17.8571	17.4753	17.3062
CHMP4C	F6RDN5	4	14.8752	14.7049	15.0892	14.7827	14.5723	14.666	14.797	15.0026
PYM1	A6QPH1;A0AAA9SNG8	6	16.4387	16.389	16.5136	16.4158	16.4323	16.3897	16.4179	16.3326
TKFC	A0JN77;Q58DK4	16	17.5988	17.4039	17.3275	17.7735	17.5289	17.2606	17.4746	17.4903
SMN1	A0AAA9RZF6;O18870	5	13.6141	14.2599	14.5365	14.3283	14.0789	14.0213	14.1035	13.9815
ATG4B	A0AAA9TG97;Q6PZ03	7	14.8972	14.9718	14.7206	14.6724	14.9322	14.4929	14.8076	14.882
NRCAM	A0A3Q1M3L7	17	15.3119	14.72	14.7149	16.197	15.0905	14.892	15.4965	16.1349
PHF23	A5D962	5	15.8318	15.4813	15.2712	15.4746	15.6059	15.8277	15.7151	15.7063
RHOD	F1N7C7	2	14.2918	14.6587	15.7405	15.4214	15.4184	15.3326	15.9516	15.3568
FBLN1	A0A3Q1MJB2	22	18.9698	19.6875	19.4439	19.2165	18.9621	18.923	19	18.904
NFIC	A0A3Q1M3P9	8	18.0744	17.7455	17.4406	17.8715	17.687	17.591	17.5323	17.5961
NUP107	E1BDU0	25	18.4135	18.1122	18.4159	18.1508	18.1374	18.3497	17.9763	18.1379
NUS1	A0A3Q1MAW4	3	13.5984	15.0265	15.6867	14.8715	14.4964	14.0764	15.0484	14.9143
UROD	A0AAA9RWR1	9	16.279	16.4289	16.2198	16.4877	16.5457	16.5438	16.5708	16.6908
TRA2B	Q3ZBT6	7	18.6176	18.4219	18.4002	18.1095	18.5596	18.6125	18.3523	18.5119
LYAR	A0AAA9RX06	6	16.8545	16.9187	16.2352	16.5648	16.5693	16.2801	16.5618	16.9479
GIT2	A0AAA9S5N2	9	14.9456	14.8454	15.052	14.8454	14.8555	14.6421	14.6941	14.7171
ILVBL	A6QQT9;A0AAF7APW4	14	16.3175	15.814	17.043	16.9677	17.2355	17.2175	17.3886	16.5876
NUP214	F1MH31	38	15.8379	15.4885	15.7658	15.6739	15.6153	15.7652	15.4939	15.6167
NFYC	A0AAF6ZUW3;Q5E9X1	3	14.9124	14.2816	14.9672	14.7725	14.7516	14.624	14.5043	14.5528
ETFDH	A0A452DIQ6;Q2KIG0	22	16.6749	16.4253	17.5324	16.9562	17.234	17.2803	17.4929	16.8735
CAT	P00432	12	17.7575	17.851	17.8786	17.7283	17.5731	17.6075	17.7567	18.0516
DHTKD1	E1BFI2	17	15.9074	15.8904	16.4299	16.3452	16.7993	17.0743	16.4716	16.2558
DICER1	F1MCQ5;Q6TUI4	6	12.6681	12.7223	13.0008	12.9463	12.8429	12.8252	13.2823	12.863
HSPBP1	Q2KJ77	11	16.2399	16.26	16.1575	16.1707	16.2821	16.3407	16.1542	16.2015
OSBPL3	F1MLJ5	17	13.9473	14.3587	14.7421	13.7761	13.7517	13.666	14.2216	14.2353
REPS1	F6Q4T4	15	15.561	15.3263	15.2528	15.6535	15.5594	15.4135	15.6101	15.574
MGAM	A0A3Q1M6D9	33	13.0895	14.4124	14.9613	16.1801	15.1392	14.992	15.6075	15.6223
LAMB1	F1MNT4	28	16.9637	17.3221	16.5102	16.7342	16.5428	15.9707	16.3454	16.0289
SHTN1	A0A3Q1MCX8	30	16.675	16.6627	16.5224	16.8025	17.0397	16.9793	16.8285	16.8948
ZNF428	E1BJ55	4	15.616	15.7878	15.5133	15.641	15.6913	15.3352	15.2675	15.1246
THOC6	A0A3Q1MZJ3	12	14.902	14.8232	14.9122	14.6994	14.8134	14.8036	14.8194	14.9332
ADARB1	F1N0T4	4	13.3162	13.8769	13.0267	13.1898	13.1663	12.8899	13.1016	13.0134
PGLYRP1	Q8SPP7	5	16.536	16.6915	16.7829	16.9906	17.2686	17.2741	17.0319	17.1416
VPS53	A0AAA9SLW2	11	15.0213	14.88	15.0839	14.8976	14.8182	14.822	14.951	14.9833
NDUFS8	P42028;A0A452DIK3	4	16.1995	16.3475	17.1563	16.051	16.1061	16.2661	16.6288	16.2259
FRYL	A0AAA9TZL4	16	15.6439	15.7843	15.9121	15.741	15.7899	15.7626	15.79	15.8374
CCDC50	A0A3Q1MBX8	7	15.2567	14.8106	14.9615	14.7437	14.7058	14.6365	14.7189	14.8911
RNPEP	G3X743	19	17.437	17.7093	17.4741	17.815	18.0479	17.9952	17.9232	18.0679
A2M	Q7SIH1	71	20.5322	21.3975	20.7474	21.1446	22.2136	21.918	21.187	21.1958
PEX11B	Q148K5;A0AAF6YS65	7	14.3941	14.4172	15.4131	14.3273	14.798	14.9283	15.0789	14.5252
TBCD	A0AAA9SWC2;Q28205	31	16.6928	16.7322	16.679	16.7884	16.9961	16.7914	16.805	16.915
MACROH2A1	A0AAA9T2Q5	11	18.4035	18.2205	18.813	18.5549	18.7306	18.9267	18.5832	18.4429
ACOT7	A0A3Q1N7U4	8	14.4399	16.0557	14.6022	14.7485	14.702	14.8162	14.8734	15.1501
NOSIP	Q3SWY5	7	16.5719	16.8931	16.5592	16.6135	16.7219	16.7136	16.721	16.8401
ARHGEF7	A0A3Q1M3G8	15	16.8763	16.7176	16.6653	16.767	16.7801	16.6242	16.7578	16.7067
SPTBN2	A0AAA9TB55	28	14.9125	15.2059	15.1312	14.3468	14.8823	15.142	15.3048	15.5009
PRKAR2B	F6Q9S4;P31322	13	17.9787	17.7765	17.4815	17.9631	17.9865	17.8496	17.9304	17.8488
PRKAR2A	A0AAF6YZS2;P00515	15	18.5481	18.2691	18.1921	18.4028	18.4607	18.3188	18.455	18.3271
TNS1	Q9GLM4	51	18.0301	17.7825	17.3074	17.9955	17.5176	17.4072	17.3837	17.3074
CHAMP1	A0AAA9SEB0	13	15.946	15.5546	15.6524	15.7464	15.5237	15.4844	15.5694	15.4767
ANXA4	A0AAF6YHR8;P13214	20	19.6331	19.236	19.605	19.2563	19.2023	19.4842	19.5687	19.5799
ACSF2	Q17QJ1	17	18.5026	18.5894	19.7215	18.0204	18.6785	18.6354	19.2345	18.8752
AKR7A2	F1MZC0;A0AAA9S338;A0AAA9SP77	14	19.337	19.4738	19.5571	19.3965	19.6765	19.6081	19.6872	19.607
SUN2	F6PTU3	22	15.4408	15.4033	15.8995	15.9326	15.6398	15.2685	16.4676	15.5169
EIF4B	F1MYS7	10	18.3514	18.2605	18.2622	18.3864	18.2155	18.1021	18.3653	18.2219
ADSL	F1MHP6;A3KN12	19	17.5608	18.0105	17.7172	17.8016	17.6297	17.5323	17.5088	17.6777
SUPT16H	E1BNP8	29	16.6493	16.6979	16.479	16.4772	16.5936	16.5783	16.4605	16.5517
SEL1L3	A0A3Q1MHD8	5	13.0287	13.0818	13.7554	12.9824	13.0668	NA	13.0697	13.0639
UBXN4	Q3ZBU9	7	15.5578	15.4201	16.4832	15.676	15.4359	15.5638	15.6592	15.5959
MB21D2	E1B9A3	5	14.6962	14.4797	15.0842	14.5345	14.9738	14.9493	14.9653	15.0847
CCDC22	Q1RMI8	18	18.247	18.1484	18.1492	18.2227	18.2459	17.9532	18.1889	18.1687
TOP2B	A0AAA9T1Q6	45	17.2293	16.903	17.102	17.0643	17.0578	17.1175	17.1526	17.0828
MMRN2	E1BJW3	9	14.8662	15.2799	15.0051	15.0128	14.8193	14.2727	14.8218	14.4662
MNAT1	Q3SX39	4	14.2603	13.6375	14.5566	13.9481	13.672	13.6756	13.6108	14.0567
FNDC1	E1BI51	21	16.3416	16.0306	15.9693	17.0278	16.5944	15.8407	16.7046	16.4696
GCN1	A0AAA9SA20	85	17.2952	17.194	17.2584	17.2336	17.3598	17.252	17.2533	17.2152
SEL1L	F1MGJ5	12	14.0233	14.5418	15.2834	14.683	14.4169	14.5307	14.8257	14.2893
EML3	F6RJ80	18	16.738	16.5763	16.4975	16.7842	16.6546	16.4221	16.5921	16.68
GOLGA5	F6RNZ4	21	15.4079	15.6279	16.0571	16.3493	16.135	16.3956	16.1721	15.9271
CAPN5	F1MQD1	12	16.2081	16.0671	16.9641	16.3316	16.4812	16.7218	16.8772	16.5008
WASHC2A	F1MTG3	23	17.3555	17.0938	17.112	17.0749	17.2288	17.1444	17.1203	17.1866
PKP3	A0A452DJL3;Q08DQ0	26	16.1681	16.0826	16.6143	16.2868	16.5444	16.5957	16.4728	16.597
SPTLC1	Q3MHG1	9	16.6727	17.3589	17.7701	16.9815	16.9762	17.1301	17.3516	16.8543
PKN2	F1MFK1	22	16.3526	16.2541	16.3075	16.3089	16.2616	16.2674	16.2917	16.299
PKP2	A4IF71	24	16.4854	16.3687	16.2631	16.3829	16.3443	16.4427	16.4736	16.4401
IDH3B	O77784	11	15.9115	15.9454	16.2285	15.833	16.0002	16.0247	16.3045	16.1441
NIFK	Q3SZM1;A0AAF6ZAT9	7	15.064	15.2494	15.4193	15.0538	15.108	15.3364	15.0609	14.9275
LXN	A0AAA9T613	4	18.1438	18.002	17.3187	17.6562	17.6019	17.5043	18.0631	18.0199
DSG2	A0A3Q1MKM2	25	18.3878	18.5919	19.0427	18.662	18.6774	18.8734	18.9348	18.7257
STRAP	Q5E959	17	17.9423	18.2204	18.3876	18.0424	17.9775	17.9677	17.9808	18.1116
TRMT6	A0AAF6YIK1;Q2T9V5	10	15.6871	15.6763	16.1443	15.6087	15.6634	15.5929	16.0128	16.1076
APOB	E1BNR0	57	15.8526	15.7365	15.4442	16.1435	17.2364	16.914	15.6528	15.7739
MAP1A	A0A3Q1M9Z4	34	16.1651	15.9575	15.66	15.9858	15.8861	15.3463	15.4869	15.2594
FBXL8	Q08DG4;F1MU23	9	15.0068	15.2055	14.9049	15.0758	15.3052	14.9195	14.9274	15.0317
TMF1	F1MUW6	10	14.9849	14.8731	15.1265	14.9375	15.0775	15.22	14.9963	14.8289
MICAL1	F1MH07;A0AAF6YSC4	11	14.9804	15.4827	15.0536	14.648	14.7218	14.6735	15.1582	15.2324
MCCC2	E1BPP6	19	16.1823	15.7586	16.5462	16.6892	16.7143	16.8375	16.8201	16.6357
COL18A1	F1N6W9	21	20.1063	19.962	19.6218	19.6802	19.6268	19.2036	19.8837	19.8175
SYPL1	A0A3S5ZPC1	3	17.8564	17.8841	18.6484	18.1957	18.5702	18.8319	18.5396	18.0463
EPB41L5	Q58CU2;A0A3Q1LUC0	7	15.2713	16.3923	15.976	15.7771	15.7625	15.6457	15.5364	15.6721
GLE1	Q3ZBK7;A0AAF6Z191	9	15.2754	15.1804	15.0857	15.1021	14.9012	15.0017	14.6898	14.9329
SMC1A	O97593	45	17.8646	17.5584	17.6363	17.6001	17.7652	17.7939	17.6901	17.7018
APOE	Q03247;A0A3Q1LPF0	14	16.7951	17.0471	17.1927	16.7002	17.2635	17.3712	16.7559	16.5256
CAAP1	Q2T9W9	3	14.1952	13.6063	14.1873	13.8238	13.6218	13.846	13.8523	13.9443
CCDC71L	A0AAA9TH50	2	13.8606	14.3357	14.5477	14.0037	14.5075	14.7021	14.5489	13.6413
AFAP1L2	Q17R10;A0AAA9SM25	18	15.8651	15.809	15.4071	15.8792	15.9593	15.8819	15.7615	15.8607
NUCB2	A0AAA9U1W7	15	18.2333	18.1142	18.0645	17.9208	17.8798	17.9826	18.0698	18.1186
TACC2	A0A3Q1N9Q2	25	15.9599	15.7025	16.1083	16.0027	16.2868	16.2725	15.9728	16.1147
LSR	F6RR15	7	13.5889	14.0384	14.6242	14.3405	14.3749	14.3199	14.4944	13.989
GALK2	A0AAA9SZH8	11	16.9355	17.2009	16.5152	17.0205	17.0503	16.7976	17.0857	17.1446
DYNC1H1	E1BDX8	189	18.0384	17.8154	17.9876	17.8976	17.8437	17.7707	17.7476	17.7397
SEC23A	F1MVW5;A2VDL8	20	17.8783	17.7706	17.5149	17.5876	17.721	17.6092	17.533	17.4381
DDX50	F1MMK3	13	14.9869	14.897	14.7292	14.78	14.5637	14.5822	14.8835	14.9471
ASRGL1	Q32LE5;A0AAF6YQE1	9	19.2185	19.4353	19.0722	19.3361	19.2998	19.3755	19.295	19.7186
TGFBI	A0AAF7APH2;P55906	20	17.04	17.664	17.1327	18.1726	17.9504	17.5198	17.9454	18.023
HSD17B4	A0AAA9TEQ9	30	18.3323	17.9347	18.9992	18.6801	18.7594	18.9395	18.6153	18.5039
PCP4	Q148C4	3	17.5383	16.2386	16.9318	18.3047	17.7026	17.7039	18.4611	18.5695
ACAT2	Q17QI3	9	17.3667	17.8298	17.3541	17.777	17.4508	17.5229	17.5627	17.5152
PPP1R21	A0A3Q1LG54	21	17.3082	17.2478	17.3253	17.2285	17.067	16.9192	17.2877	17.1472
UBA1	A0AAA9SHQ7;A3KMV5	45	20.5668	20.5065	20.4867	20.5079	20.5421	20.4554	20.5581	20.5843
NOC2L	A0AAF6Z2P7;Q3SYU1	8	14.8924	15.4614	15.5507	14.7983	14.7025	14.9945	14.8858	15.2041
ADH5	Q3ZC42	11	20.2243	20.248	20.0922	20.4648	20.5371	20.3128	20.3294	20.2726
MRPS30	P82924	6	14.6853	15.156	15.7701	14.5762	14.5097	14.8257	15.1323	14.916
ETFA	F1MWR3;Q2KJE4	12	18.8165	18.4737	19.1345	18.7024	19.1315	19.3339	19.239	19.036
PGM3	A0A3Q1LUV2	18	17.0862	17.4973	16.8622	17.2463	17.2722	17.1999	17.2599	17.4207
CHD4	F1N3F6	26	19.1336	19.0286	18.9865	18.9344	18.8461	18.8992	18.8883	18.8951
WDR35	A0A3Q1LWP8	15	14.7646	14.6917	14.8974	14.6503	14.9245	14.9293	14.7769	14.6596
CROCC2	F1MMB4	33	15.648	15.2735	16.1235	16.4152	15.9875	16.2747	16.2999	16.2993
SEPTIN8	A0A3Q1LN12;Q0VCP4	11	17.8741	17.3504	17.5127	17.6083	17.5691	17.4641	17.5805	17.5877
HSPD1	G3N0R5;P31081	30	20.2312	20.3933	21.1427	20.5381	20.6389	20.7716	20.9153	20.6836
PSMD1	A7MBA2	30	18.9198	18.9388	19.0889	18.8218	18.9421	18.8386	18.8566	18.8972
HAUS7	A0AAA9SKB6	6	13.4066	13.4971	13.1808	13.03	13.3091	12.9652	12.7637	13.1427
EWSR1	A0A3S5ZPJ4	6	18.7656	18.7535	18.833	18.9494	18.7698	18.8451	18.661	18.9193
EDC3	E1BEA2	12	15.9377	15.9851	16.0506	16.1101	15.896	15.8179	15.565	15.8645
ARFGAP3	Q17R07	19	16.3591	16.3383	16.1898	16.4141	16.3023	16.0652	16.0955	16.2055
CARS1	A4FUC8	35	17.7324	17.6846	17.806	17.8667	17.8787	17.9817	17.8596	17.9591
IRF2BPL	F1N3F2	5	15.5074	15.2687	14.5927	14.8973	15.192	15.2125	15.286	15.4168
FBXW9	Q2T9T9;F1MD71	9	14.8888	14.8034	14.455	15.1934	14.8722	14.7182	14.7849	14.9508
ALAD	Q58DK5	18	18.8597	19.0376	18.9416	18.9795	19.3364	19.2883	19.3865	19.4976
DHDH	A0AAA9TS87;Q148L6	12	17.0821	17.0451	16.6154	16.9003	17.1434	16.8274	16.7598	16.7511
SF3B2	F1MC31	21	18.1552	17.9637	18.3109	17.8839	17.9514	18.0682	18.0316	18.0577
PRPF8	A7Z025	74	17.2797	17.0674	17.3235	17.0165	16.9888	17.071	17.0115	17.1351
PRODH	Q148G5;G3N3Y2	20	15.7177	15.6109	16.2586	16.3204	16.4426	16.6873	16.8633	16.369
ENAH	F1N214	12	15.9293	16.4411	15.9712	16.088	15.9713	15.8052	15.8494	16.0431
HSPA12A	A0AAA9RXG1	16	16.9341	16.553	16.423	16.5552	16.5233	16.0956	16.0865	16.0445
TLN2	F1MQI1	71	18.901	18.4152	18.0416	18.7374	18.3448	17.872	18.1394	17.9268
ISG20L2	Q2YDK1	6	14.4412	13.9766	14.3334	13.9285	14.4945	14.3183	14.1113	13.9404
MED13L	A0AAA9T6T6	3	14.2707	13.8792	14.4669	14.1585	14.0814	14.5266	14.1864	14.4712
MOB3B	Q29RK9	2	13.9453	13.9924	13.831	13.9612	14.1862	13.7981	13.3982	14.2648
CBR1	Q3SZD7	3	16.4443	15.2212	16.0703	16.4813	17.3199	17.2884	17.3091	17.3357
MMUT	Q0III1;Q9GK13	17	16.5523	16.5526	17.2935	16.8897	17.0497	17.2863	17.1277	16.9814
NCOR1	A0AAA9RZH3	13	16.9195	16.668	16.9628	16.6323	16.6577	16.4535	16.6142	16.6628
REEP5	Q29RM3;F1MDM4	8	19.5807	18.6062	19.4975	19.7326	19.8478	20.2028	19.5974	19.1253
PDS5A	E1BKG4	35	16.9752	16.6947	16.6404	16.8866	16.8471	16.8915	16.8585	16.814
HBB	P02070	14	23.5134	23.8173	23.1862	23.1891	23.3672	23.22	23.0432	23.1399
TOR1AIP2	A5PKH0	10	13.4944	13.9073	14.3838	14.068	14.1661	13.991	14.3273	13.9702
LIG3	F1MQY1	24	17.3428	16.9539	16.8021	16.9463	16.9675	16.9947	16.8259	16.8205
C3	Q2UVX4	93	21.2516	22.0724	20.3553	21.934	22.1188	22.1011	21.8183	21.8654
OPA3	G3MYY7	2	NA	13.9097	14.499	14.0519	NA	NA	14.1105	NA
UMPS	P31754;A0AAA9T4P2	15	16.8827	16.9238	16.6607	17.0204	17.1219	16.851	17.0765	17.1916
ACADM	Q3SZB4	11	17.0258	16.8867	17.2087	17.0937	17.3979	17.5189	17.4818	17.4934
SRD5A1	A0AAF6Z1H8;A5PJS2	3	12.7438	15.1609	14.8269	14.4177	NA	13.1716	15.038	14.8775
WDR47	A0AAA9TQT5	9	14.4862	14.0197	14.4013	14.9393	15.0087	15.0376	14.6923	14.5256
FLOT1	Q08DN8	16	16.394	16.1875	16.6223	16.7057	16.4644	16.3773	16.7649	16.2684
YKT6	A0AAF6YH77;Q3T000	9	16.6127	16.878	16.7395	16.7022	16.8203	16.6287	16.7372	16.6872
LMNA	F1MYG5	38	22.205	21.6035	21.8349	21.407	21.5951	21.3337	21.6474	21.5331
ALDH5A1	A0AAA9TXM1	19	17.8291	16.4898	18.3674	18.2029	17.2344	17.3992	18.3646	18.0347
TPCN2	A0A3Q1MD89	5	14.564	15.159	15.8112	14.816	14.8164	14.7071	15.7752	15.0745
SLC25A4	A0AAF6YYL2;A0A3Q1ME66;P02722	6	19.7498	20.342	21.6226	20.0766	20.2652	20.3816	21.0169	20.2909
RAPH1	A0A3Q1M2Z8	12	14.7241	14.5959	14.825	14.8545	14.9389	14.8726	15.1593	15.1328
CHD3	A0A3Q1M3Y2	9	14.8261	14.4061	14.6704	14.6151	14.3091	14.5356	14.0628	14.1792
CCAR2	E1B9H3	19	17.7474	17.2121	17.7012	17.455	17.5906	17.5864	17.5321	17.5255
FTO	A5D798	17	15.8973	15.9753	15.5369	15.8692	16.0765	15.8309	15.6742	15.7464
NMT1	F1MZK0;P31717	11	20.3501	20.6353	20.6338	20.3949	20.4625	20.4608	20.4287	20.5809
CCDC124	Q2TBV6	7	19.6165	20.093	19.9826	19.7784	20.0456	19.9167	19.8162	19.9846
CFB	P81187	30	19.7053	20.7719	19.6089	20.5499	20.7449	20.7647	20.2751	20.3131
UBE4B	A0A3Q1MHZ2	23	16.195	16.3172	16.1453	16.2945	16.2136	16.1769	16.2608	16.3509
GNB1	P62871	4	17.9208	17.7499	18.481	18.1933	18.057	17.9322	18.2431	17.7532
DNAAF5	G3N314	16	15.5611	15.5612	15.7271	15.7206	15.6275	15.6723	15.452	15.5563
TPK1	Q5E9T4	4	15.2098	15.3871	15.21	15.5375	15.0973	15.0175	15.6138	15.4751
PGK1	Q3T0P6;A0AAA9SR81	24	20.9715	21.177	20.9991	20.844	21.1126	21.0504	21.1612	21.2248
FSCN1	Q3MHK9	23	19.2297	19.723	19.0426	19.1781	19.5086	19.1408	19.1399	19.1338
UBR4	A0AAA9TU63	74	16.1192	16.2705	16.3133	16.108	16.1444	16.1451	16.1396	16.1977
VPS35	Q2HJG5	30	18.1239	18.1447	17.8692	18.0945	18.1176	18.0474	18.0746	18.0957
ARHGEF25	F1MWU7	5	13.7876	13.7083	13.3266	14.0854	13.108	NA	NA	12.8484
HEATR6	E1BHR5	8	15.7017	15.3799	15.1015	15.238	15.6876	15.6377	15.5547	15.4547
CRYZL1	A0AAA9RYU5;Q59A28	8	17.7138	17.7471	18.0591	17.7805	17.7395	17.6139	17.8418	17.8539
AKR1B1	P16116;A0A493UA87;A0A3Q1MBL5;A0A3Q1M9Q1;A0AAA9TRD4	25	22.2942	22.5875	22.2128	22.4853	22.6476	22.6333	22.4667	22.6921
ERBB2	A0AAA9SBR4	11	14.0831	14.3405	14.3482	14.1032	14.1555	14.4589	14.5486	14.2566
TBC1D7	Q5E9C4	4	13.4616	13.2123	13.3771	13.3438	13.4146	13.4619	13.4916	14.0696
FNDC3B	F1MPN0	8	14.1599	14.6661	15.3128	14.9927	14.557	14.6566	15.0662	14.5373
LAMC1	F1MD77	34	17.3968	17.7206	17.1379	17.0075	16.9157	16.3935	17.1136	16.7184
ZMYND11	A0A3Q1LJL9	2	13.5111	13.1772	13.3437	NA	NA	12.7748	12.794	13.0418
LSS	F1MTJ9;P84466	25	16.6117	16.5753	17.5982	17.2295	17.0473	17.2027	17.1475	16.9649
NUB1	Q8MJ87;F6QQ96	9	15.1157	15.0954	14.9449	14.9171	15.3008	15.0749	15.0421	14.9407
CFI	A0A3Q1MIF4	29	17.7033	18.4877	16.9942	18.3184	18.7162	18.7296	18.2638	18.3867
MMS19	E1BP36	24	15.5687	15.8152	15.7644	15.6134	15.5862	15.6505	15.6132	15.7466
DFFA	Q0VC37	12	15.9582	16.0354	15.8873	15.9094	16.0748	15.9607	15.7523	15.8115
COA7	A0AAA9TD90	4	14.4156	14.4552	15.1629	14.4247	14.3084	14.3527	14.8504	14.7276
ITPR3	Q8WN95;E1BKE7	10	14.3586	15.4643	14.4291	14.4433	14.9772	15.0269	15.0875	14.6814
ALS2	F1MDF3	29	15.0527	14.8852	15.5353	15.2504	15.2552	15.2719	15.0814	15.2023
FHIP2A	G3X6C8;A0JNG7	12	14.8234	15.0154	14.9179	14.626	14.9138	14.6823	14.8422	14.8627
ACOT11	A0A3Q1M171	8	14.7609	14.8279	14.7319	14.9181	15.0394	14.8478	14.8836	14.9633
MAVS	A0AAA9S9F2	6	13.884	14.6246	14.3649	14.2414	14.4477	14.4113	14.2694	14.328
POFUT2	F1MPI4	16	16.0305	15.9922	16.2068	15.9691	16.2107	16.1441	15.8709	15.7956
ARFGEF1	E1BP90;O46382	23	20.5903	20.563	20.752	20.5676	20.6714	20.6492	20.5273	20.6871
BIRC6	E1BE13	30	14.9198	15.1804	15.3881	15.076	14.9963	14.9506	14.9668	14.9824
LASP1	Q3B7M5	14	20.1507	19.9905	19.9427	19.9727	19.8683	19.8104	19.7808	19.9294
VARS1	A0AAA9T803	39	17.8055	17.6712	17.8888	17.7403	17.8522	17.9258	17.6923	17.6854
TRAPPC8	A0A3Q1N5L8	29	15.9098	15.9192	16.1247	15.9124	15.9553	16.0033	15.9343	15.999
RBM17	A7MB77;A0A3Q1M2Z2	9	16.1461	15.9493	16.1509	15.9306	16.037	16.2453	16.1018	16.1927
NPLOC4	F1N7U2	22	16.9998	16.9008	16.8274	16.974	17.113	17.1106	17.0542	17.1347
TNC	A0A3Q1LKE5	10	14.5888	14.0036	NA	15.3402	13.616	NA	NA	NA
ABLIM2	A0A3Q1N513	15	14.8828	14.4682	14.8218	14.741	15.1571	15.251	15.0863	15.0814
GNB2	P11017	4	18.4209	18.3528	18.5138	18.6943	18.774	18.845	18.9131	18.6842
ZFYVE1	E1BPK7	11	14.8212	14.9679	14.7931	14.9119	14.7379	14.8513	14.8266	14.7121
VAT1	F1MUP9	20	20.0797	19.8517	19.4778	19.8529	20.1277	19.9639	19.9962	19.9887
VAT1L	F6RA71	3	13.6431	14.0595	13.4281	14.1148	13.4425	NA	NA	NA
HGS	A0AAF6YHD5;Q0V8S0	13	16.0078	15.9732	15.8167	16.1147	15.9418	15.9197	15.8965	16.1048
C7	Q29RQ1;F1N045	36	16.7311	17.3715	16.7287	17.0196	17.5443	17.5892	17.0524	17.0943
ARRB1	P17870	17	16.3414	16.4216	15.7765	16.2098	16.1398	16.3039	16.1272	16.3169
SNU13	Q3B8S0	6	18.9109	18.5763	18.8505	18.4924	18.6703	18.816	18.7685	18.6889
ARHGEF12	A0A3Q1MN47	19	19.1561	18.8507	18.9494	19.0823	18.9733	19.0299	18.761	18.7041
TPP2	A5PK39;A0A3Q1M996	20	16.625	17.1498	16.4692	16.41	16.4356	16.3123	16.5441	16.6667
STAT2	E1B8Z4	17	15.7135	15.7295	15.6501	15.6723	16.9725	16.9091	16.95	16.8786
UBA6	F1ME38	32	16.7811	16.6648	16.5794	16.7172	16.7713	16.649	16.6753	16.8122
DDX27	A1A4H6;A0AAF6ZIP1	13	15.0958	15.1886	15.0796	14.7403	14.8848	14.8892	15.0081	15.015
MAP2K6	Q5E9X2	10	16.6133	16.5719	16.0177	16.5568	16.6835	16.302	16.1195	16.1033
MMAA	A6QQI8	9	14.7389	14.6999	15.3804	14.8674	14.7558	14.7924	15.5382	15.3075
ITGB4	A0A3Q1M9I5	52	16.2182	16.3372	17.2002	16.7568	16.7373	16.9952	17.2273	16.9748
IQSEC1	A0A3Q1MCH9	6	15.5263	15.3431	15.3227	15.025	15.2386	14.979	14.8432	15.0614
EXT2	A0A3S5ZPA0;O77783	2	13.8238	13.8764	13.8593	13.7728	NA	13.852	NA	13.6755
CRELD1	A0AAA9SSY0;Q5EA46	7	17.922	18.047	19.1196	18.5701	18.1962	18.3699	18.7592	17.9121
CTSF	Q0VCU3	5	14.8018	14.3782	14.1365	14.385	14.4776	14.3612	14.5807	14.3939
PSMC2	Q5E9F9	19	17.6438	17.6471	17.6122	17.559	17.7317	17.6603	17.7504	17.7907
MTOR	E1BFB4	45	16.4967	16.285	16.5349	16.3053	16.3943	16.4254	16.3793	16.3442
ACTN1	Q3B7N2	33	19.0248	19.1014	19.3497	19.3149	18.6951	18.8035	19.2855	19.5175
ACTN4	A5D7D1	38	21.5118	21.4808	21.7516	21.5507	21.3692	21.4885	21.5978	21.7448
SUPT4H1	Q3SYX6	2	16.0804	16.0923	16.2861	15.9867	16.2106	16.0916	16.2111	16.4056
LMNB2	F1MJI7	33	19.6986	19.0731	19.3969	19.1291	19.4172	19.4708	19.3657	19.2811
IAH1	Q3SZ16;A0AAA9TS64	9	17.3915	17.3235	17.091	17.2301	17.6578	17.3525	16.4022	16.7165
WDR11	A6QLS8	25	16.2677	16.1845	16.3387	16.3219	16.4102	16.4368	16.2497	16.2289
NUP85	Q3ZC98	14	16.2931	16.3143	16.3797	16.2574	16.1633	16.3284	15.9553	16.0246
ITGA6	A0A3Q1M8K4	26	16.9114	17.9618	18.2642	17.4488	17.5286	17.6633	18.0926	17.6288
GRWD1	Q1JQD2;A0AAF6YGY8	11	16.3107	16.3636	16.6253	16.1914	16.4155	16.5539	16.3963	16.5352
PELP1	A0A3Q1MDL1	19	16.9579	16.6784	16.7019	16.729	16.9115	17.1809	16.8535	16.8581
PTPRF	A7MBJ4	37	18.0746	17.8932	18.2082	18.2474	17.9614	18.0098	18.2953	18.3685
PTPRA	E1BPA0	12	15.175	15.2649	14.8548	15.0928	15.152	14.8929	14.9655	14.8461
GP2	A0AAA9TCP0	6	13.901	15.0136	14.3537	13.6502	15.1961	15.2886	14.2342	14.3495
RPA2	A0AAA9TRL7;A0A3Q1MFW6;F6RU89;A0A3Q1MGF7	5	16.7719	16.9511	16.7076	17.0195	16.7973	16.6125	16.4204	16.5882
NELFCD	F1MW69	13	16.075	16.1072	16.1287	15.8997	15.9364	15.8307	15.8948	16.0635
NID1	A6QNS6	26	17.0933	17.0547	16.7422	16.7732	16.5379	16.0683	16.8681	16.4265
THBS2	Q95116;A0AAA9S7Y7	4	NA	14.3733	14.5763	14.5547	NA	NA	NA	NA
CFTR	F1MN01;P35071	11	13.9669	13.4434	14.3902	14.6559	14.1168	14.1876	14.1632	13.8175
TRRAP	A0AAA9SVS0	54	18.9747	18.8107	19.0106	18.8532	19.0515	19.1561	18.8388	18.8929
RPS3A	Q56JV9;G3N262;A0A3Q1N7H0;A0AAA9ST32;A0AAA9RXK0;A0AAA9TAX3	10	19.3175	19.4819	19.6569	19.2481	19.2451	19.3768	19.3546	19.3633
HEATR5B	E1BB26	21	14.4273	14.6221	14.4067	14.6354	14.4359	14.4211	14.4743	14.5669
EGFR	A0A3Q1MHB0	11	15.2443	15.9424	15.7697	15.2439	15.7299	15.4949	15.6582	15.4963
LTN1	F1MTS8	15	14.603	14.8857	14.8853	14.6679	14.8274	14.7729	14.7631	14.6717
SHROOM3	A0A3Q1NCP3	13	14.8681	14.6898	14.7862	14.8064	15.1891	15.0436	14.9398	14.9712
GNL3L	Q3T0J9;A0A3Q1MFA8	8	14.5565	14.6827	14.4824	14.5275	14.819	14.9359	14.7081	14.4835
SQLE	A5D9A8	6	13.7875	13.591	14.3031	14.4698	14.6091	14.8804	14.6061	14.0571
ITPRID2	A0A3Q1LNI4	22	18.5843	18.5981	18.8224	18.4833	18.5797	18.8202	18.7912	18.9151
NME9	Q148E9	11	14.9489	15.21	15.4796	15.482	15.4321	15.4818	15.4605	15.8152
PLBD2	F1MIH9;Q2KIY5	16	17.892	18.2129	18.0722	17.7958	17.8227	17.8237	17.8266	17.9697
NEPRO	A0AAA9SA39	2	11.9441	NA	12.6374	12.5645	12.6415	12.819	12.5452	12.3395
WFDC2	G3MX65	2	16.6431	15.9623	14.8734	15.6883	16.9312	16.5662	17.043	16.5879
NADK	F1MCL6	9	15.8666	15.9145	16.3174	15.9398	15.7711	15.8688	16.1121	16.1259
PNP	A0AAA9TPI6;P55859;A0A452DJA8	18	22.5951	22.764	22.4003	22.5745	22.9888	22.8551	22.7815	22.868
SBF1	G5E5Q8	18	15.0508	14.8528	14.9914	14.8939	14.9976	14.9427	14.9771	15.1184
SBF2	A0A3Q1LVT0	8	14.6994	14.0039	14.2639	14.3674	14.1974	13.8698	14.2742	13.6658
KDM2A	F1N735	14	17.7831	17.4562	17.4402	17.3816	17.3528	17.5879	17.5426	17.7165
CHID1	Q5EAB4	10	16.7955	16.8474	16.7837	17.0619	17.0171	17.0857	16.8878	17.0167
IPO7	E1BGE5	21	17.2377	17.2923	17.1457	17.1211	17.1673	17.105	17.1816	17.2545
ACTR1B	A4IFE3	8	15.6356	16.0167	15.546	16.3493	15.791	15.4938	15.3134	15.3201
ACTR1A	F2Z4F0	10	17.8118	17.881	17.6596	17.9876	17.8936	17.8011	17.7479	17.6958
DUSP28	A0A3Q1MH98	6	17.2006	17.0515	16.8537	17.2029	17.2284	17.2485	17.1299	17.1238
JPH1	G5E5B8	3	16.4256	15.8023	17.1619	16.5993	17.3606	17.3638	17.2415	16.7781
URB1	F1MZA7	20	20.8776	20.8282	21.0019	20.7284	20.7226	20.9935	20.5758	20.4248
SGF29	E1BN74	2	14.2338	14.4371	14.1749	14.5346	14.2857	14.0138	14.0398	14.5658
ERLIN2	Q1RMU4	12	16.8696	16.7886	17.7522	17.3118	17.4556	17.6452	17.5774	16.9815
DYNC1I2	F1N7H7;Q0III3	18	19.5333	19.3943	19.5029	19.5739	19.3804	19.3234	19.3162	19.342
ERLIN1	G3N0U8	8	15.8676	15.9474	16.8109	16.2544	16.3199	16.4625	16.4532	16.0583
CASK	A0AAA9TVT5	23	16.6694	16.4381	16.2691	16.585	16.5569	16.5488	16.7275	16.6526
SPIN1	E1BD88	9	15.9261	15.5113	15.5346	15.6957	15.7968	15.7557	15.7106	15.7518
CILP2	E1BKL4	10	14.904	15.6192	14.9775	14.9734	15.3203	15.4977	14.7969	14.9856
CCDC93	A4IFE0	20	16.8292	16.4386	16.436	16.5316	16.5142	16.3983	16.5167	16.4383
CXXC1	Q5EA28	6	14.0968	14.1165	14.4094	14.355	14.2987	14.1067	14.4631	14.1584
JMJD6	A0A452DJR2;Q58DS6	7	13.6899	14.2239	14.0949	13.9895	13.9346	13.911	14.0934	14.1662
RNASEH2A	Q2TBT5	6	16.2013	16.245	15.9323	16.2128	16.4908	16.4777	16.0122	16.0138
PLRG1	Q2KID6;A0AAF6ZAG7	12	15.8788	15.6399	15.6572	15.5264	15.7094	15.6582	15.6508	15.7807
MBD1	A0AAA9SCN9	8	14.6683	14.2542	15.146	14.5276	14.409	14.7275	14.4569	14.4937
HIP1R	A0AAA9SBB5	37	16.1682	16.5446	17.1603	16.3107	16.5216	16.4555	16.7357	16.8736
EYA3	F1MGK4	7	15.846	15.9243	16.368	15.8667	15.7348	16.0624	16.3609	16.3545
AHSA1	Q3T0G3	14	17.2551	17.3414	17.195	17.3358	17.4178	17.3081	17.2872	17.2221
TUFM	P49410;A0AAF6Z672	22	19.0592	19.1872	19.9682	19.0407	19.3491	19.5347	19.6299	19.418
AP1G1	A0A3Q1M952	18	17.5088	17.5523	17.4898	17.5896	17.5944	17.5835	17.604	17.7089
AP1G2	F6QYT8	16	16.6774	17.1063	17.3611	16.6898	16.7691	16.9496	17.0574	17.0987
FBXO6	Q3SX24	7	14.928	15.3217	14.8908	14.6152	15.1118	14.8616	15.0199	15.2007
RECQL	A0AAA9S5G9	5	13.914	14.0448	13.4079	13.7139	13.6679	13.4178	13.2278	13.6132
SEPTIN5	Q0VC68	12	16.7937	16.5889	17.0016	16.3733	16.3669	16.0349	16.4703	16.4376
TBC1D9B	A0A3Q1LTG9	18	16.3797	16.2872	16.2302	16.2472	16.4994	16.3182	16.2564	16.2737
SCP2	F1MV74;P07857	22	18.1898	18.2708	18.3736	18.0209	18.2308	18.5255	18.605	18.7715
SND1	Q863B3	36	18.189	18.4773	18.0911	18.1442	18.0412	18.09	18.0221	18.1679
NES	A0AAA9TRB0	43	17.0403	16.5805	16.6552	16.8646	16.476	15.9438	16.1648	15.8318
SEC14L4	A0A3Q1LYF4	6	15.3382	15.6028	14.9996	15.4936	15.8491	15.7142	16.0177	16.1883
SAMHD1	Q0VCA5	26	17.0994	16.7574	16.6888	17.1649	16.9455	16.8224	16.9886	17.1153
ACSM3	F1MES1	9	15.178	14.8389	15.2217	14.6238	15.0935	15.5171	15.1322	15.0023
LETM1	F1N3R4;Q0VCA3	27	16.0587	16.4955	17.5944	16.4454	16.6242	16.6363	17.2078	16.452
DCPS	Q8MJJ7;G5E535	9	18.494	18.3189	18.1535	18.3479	18.4442	18.2619	18.3765	18.4125
WBP11	E1BNM6;A0A3Q1MQG9;A0AAA9TF65	14	16.2131	15.9899	15.6903	16.1505	16.0119	15.9288	16.1462	16.0274
PC	Q29RK2	36	15.6369	16.2823	16.1103	15.9587	16.3145	16.4162	16.4784	16.2329
CHMP4A	A2VDY3;A0AAA9T8M2	6	14.8386	15.1437	15.1802	14.9666	15.2888	15.1991	15.0936	15.3633
PITPNB	Q9TR36	12	17.4999	17.5294	17.3642	17.6492	17.8563	17.8676	17.5504	17.6722
NUTF2	Q32KP9;A0AAF6YPQ4	4	19.3839	19.6141	19.442	19.6222	19.6563	19.4983	19.3706	19.4475
CUX1	F1N693	24	16.9561	16.8097	17.2726	17.1686	17.1851	17.3658	17.2494	17.2533
INTS1	A0AAA9TV32	24	16.2518	16.0428	16.4307	16.1086	16.1724	16.4761	16.196	16.1447
PLXNB2	G3X755	42	15.4678	15.6637	16.106	15.6921	15.6672	15.8169	16.084	15.8145
BIN1	E1BNG8	14	16.7243	16.4971	16.717	16.6637	16.6461	16.6058	16.8222	16.7996
PHLDB2	A0A3Q1M8W3	12	14.875	14.6448	14.9248	14.6478	14.6974	14.3436	14.8677	14.8466
ACSL3	F1MEX9	17	18.3041	18.5606	18.9332	18.4265	18.7244	18.7722	18.9984	18.748
GDPD3	E1BJ80	2	12.7517	12.5814	13.302	12.5353	NA	NA	13.3316	12.7505
SMPD4	F1MBU2	23	14.5188	14.7494	15.3619	14.8271	15.0785	15.0124	15.0908	14.7227
COMMD7	Q3MHX1	4	16.5804	16.2997	16.3592	16.6529	16.449	16.4585	16.2587	16.6116
DAD1	Q5E9C2;A0AAF6Z6H0	4	17.2217	17.7462	18.1786	17.6461	17.5082	17.5053	18.0949	17.4006
FAM76B	A0AAA9SAS8	2	14.6927	14.8411	15.0356	NA	14.9811	14.7951	14.9785	15.2184
SERPINB9	F6Q447	9	14.9784	16.9986	15.75	15.3438	15.5844	15.2699	15.8155	16.1227
SERPINB6	O02739;A0A3Q1MJK1;A0A3Q1NAJ0	7	19.1231	18.8585	18.8056	19.2218	19.4068	19.3445	19.1641	19.2279
MIOS	E1B899	12	15.2964	14.8779	15.3067	15.0242	15.0893	15.225	15.3198	15.1003
DNAH1	G3N1C8	2	12.7077	12.4688	12.874	12.1358	11.4941	13.1333	12.6773	12.6448
FKBP8	F1N2P6	9	15.6661	15.7711	16.3013	15.6551	15.8463	16.0189	16.0258	15.807
MYO1D	A0AAA9RSU9;Q17R14	29	18.9959	19.8253	19.888	19.2408	19.2472	19.3926	19.685	19.7708
CCDC97	A3KMW0	5	14.2081	14.0377	14.1817	14.1849	14.2142	14.0729	14.2657	14.1152
TJP1	A0AAA9S4Y0	53	18.0377	17.7271	17.8729	18.1426	18.1714	18.4216	18.0999	18.0941
LIG1	A0A3S5ZPU0	3	12.4152	12.717	12.4819	12.317	12.3039	NA	12.4506	12.7059
IGF2R	F1MIE6;P08169	37	16.1496	16.2599	16.5703	16.5596	16.2761	16.3031	16.0663	15.8504
ACADS	Q3ZBF6;A0AAA9SUD1	14	17.2456	17.1966	17.9485	17.219	17.381	17.4989	17.329	17.3106
ATXN10	Q2TBW0;A0AAA9SI20	19	16.4274	16.5124	16.4806	16.5341	16.6977	16.5583	16.39	16.4023
TANC1	G3X6E6	8	14.063	13.8061	14.0043	14.0024	13.9646	13.9334	13.5875	13.8027
SERPINC1	F1MSZ6;P41361	18	20.399	21.0614	20.3394	20.6892	21.4382	21.5138	20.6543	20.672
MFAP4	P55918	2	18.428	18.0157	18.073	18.3432	17.7225	17.7594	17.5304	17.7697
PHLDB1	A0A3Q1MN58	20	18.3491	18.1457	17.6811	17.9702	17.8453	17.5541	17.6766	17.6787
MRPL24	Q3SYS0	6	13.6175	13.9131	15.2844	14.0419	13.6415	13.8639	14.1886	14.1221
EMC1	A0A3Q1M175	23	15.7088	15.9653	16.5652	16.2542	16.2522	16.3199	16.5805	16.0091
ATXN2L	E1BJ59	17	15.887	15.7901	16.0962	15.8639	15.9391	15.915	15.9131	16.0242
CHIA	Q95M17;F1MH27	3	14.8477	16.2657	14.832	16.0159	16.1232	16.2238	15.7802	15.6532
ZC3HAV1	E1BCF8	27	16.4032	16.2773	16.3912	16.3778	16.4832	16.4787	16.4325	16.3674
KIAA0930	F1MEV2	7	14.0175	14.5196	14.4925	13.9191	13.9796	14.0576	14.2653	14.5861
TBC1D10B	F1MJZ7	10	14.7405	14.7263	14.7375	14.7045	15.0267	15.1006	14.9161	14.9687
GSDME	E1BFC3	9	15.2313	15.0972	15.3811	15.9441	15.6731	15.5515	15.259	14.9773
AFDN	A0A3Q1M9W3	57	17.806	17.449	17.8955	17.7737	17.6589	17.7513	17.7745	17.8796
PTK7	F1MWK8	27	17.5678	17.5022	17.1555	17.9792	17.8422	17.4438	17.668	17.2664
DLD	F1N206	11	18.7449	18.8742	19.6333	18.9065	18.9117	19.0388	19.332	19.0931
MBLAC1	Q2HJB0;A0AAA9TEJ4	10	15.1459	15.0971	15.0808	15.3477	15.3362	15.2274	15.2262	15.4847
ATP11A	A0A3Q1MCZ4	3	13.0119	12.5406	13.0668	NA	12.5513	13.0416	13.2468	12.3359
CTPS2	A0A3Q1LLS1;Q1RMS2	20	17.8962	17.8083	17.5042	17.8709	18.0584	17.8807	17.8188	17.8002
HNRNPR	A0A3Q1MI86	21	19.5544	19.319	19.2577	19.2882	19.4616	19.5577	19.3645	19.452
TERF2IP	Q0VCT3	9	14.93	14.8026	14.5279	14.9932	14.914	15.0022	14.8786	14.9093
LHPP	Q0VD18	7	15.2444	15.7368	14.8831	15.6082	15.2744	14.9648	14.9902	15.2679
RPS8	Q5E958;A0AAF6Z178	10	19.2501	19.7339	19.8154	19.2917	19.258	19.5083	19.5278	19.417
BROX	A0AAA9T5V2	4	15.2034	15.0829	15.0594	15.2408	15.1473	15.3107	15.0518	15.2972
PSMC6	Q2KIW6;A0A3Q1LQF0;A0AAA9SEL8	13	17.3968	17.3761	17.5377	17.4733	17.3989	17.3951	17.5162	17.4103
CES2	F1MU22	4	14.0053	13.5188	13.8913	NA	14.3496	13.8716	14.0453	13.8463
HSP90AB1	Q76LV1;G3N2V5;A0A3Q1LTQ4	28	21.8053	22.0182	21.7609	21.936	22.0187	22.0001	22.1294	22.1645
ACSL5	Q1LZF6	7	14.5067	14.6493	15.1878	14.4112	14.5904	14.9459	15.4415	15.1112
ACO2	P20004	32	19.7563	19.8694	21.0419	20.0437	20.1653	20.2364	20.6606	20.3235
AHNAK	F1MCK2	163	21.5817	21.4672	21.3417	21.4229	21.1509	21.0996	21.2276	21.064
GOLGA4	A0A3Q1N365	42	16.8052	16.769	16.8541	16.6336	16.8318	16.9025	16.7768	16.7761
EIF2S1	P68102	16	18.0866	18.1095	18.1598	17.9452	18.0199	18.1422	18.1002	18.2182
ABCE1	A4IFE6	20	16.318	16.7855	16.6912	16.3173	16.2855	16.2935	16.3519	16.5233
GLG1	A0AAA9SE43	28	15.5215	16.2078	16.8838	15.9512	15.799	15.856	16.2608	15.8657
LARS1	A0A3Q1N108	37	17.3002	17.3329	17.4538	17.3927	17.2655	17.1941	17.2747	17.3611
AFM	G3MYZ3;A0AAA9TF38	33	19.0698	17.4185	16.839	17.9382	20.865	20.9298	20.2394	20.1358
ASPA	F1MUZ8;P46446	10	16.2781	16.5919	16.2487	16.2729	16.5784	16.7017	16.7717	16.7498
HNRNPM	A0A3Q1MJD5;A0A3Q1M8F3	29	21.0029	20.9569	20.8229	20.9075	20.9429	20.9248	20.8403	20.9764
PAIP1	G3MZ83;F6RWP3	9	16.6471	16.8968	17.1733	16.6838	16.5973	16.6912	16.7825	16.8105
RAB28	Q3SWY9	7	15.792	15.7011	15.7451	15.7263	15.5182	15.7067	15.3092	15.4461
OXSR1	A0AAA9RUX7	9	16.8415	17.0646	16.8312	16.7852	16.9304	16.7726	16.8009	17.0432
PSAP	P26779;A0A140T8C6	25	21.1548	21.3546	21.4703	21.1082	21.1837	21.3027	21.4454	21.491
MARS1	F1MDW1;Q2T9L8	19	16.9758	16.9698	17.2978	17.021	16.9375	16.8983	16.9616	17.0017
MIPEP	A0AAA9SQY1	13	14.8463	14.6818	15.6143	14.9377	14.7376	14.8445	15.1739	14.8266
SGSH	E1BFX4	6	14.8998	14.8655	15.05	15.1332	15.0256	14.9943	15.3422	15.1209
UBE2L3	Q3MHP1	5	18.4353	18.5212	18.4713	18.4621	18.5894	18.5469	18.5619	18.6127
OXR1	A5PKL1	15	15.5464	15.5943	15.0368	15.8018	15.5392	15.3807	15.3571	15.5114
CGNL1	G5E5V6	17	15.2979	15.2821	15.3509	15.1822	15.09	15.112	15.1263	15.2435
HRG	P33433;F1MKS5	17	20.6105	21.6454	19.7098	20.7509	21.3253	21.5029	20.9355	20.9834
SORT1	E1BKZ9	6	14.5993	14.307	14.9232	14.6702	15.0291	15.428	14.9742	15.0935
POP4	A0AAF6YJ89;Q2KIB9	4	14.4376	14.2047	NA	14.3143	14.63	14.7047	14.2417	14.4811
ANKRD27	F1N642	6	14.1271	13.99	13.1972	13.7732	13.8096	13.8117	14.0662	13.8054
NIF3L1	Q05B89	11	16.8547	16.5851	16.1691	16.7011	16.8574	16.7906	16.9741	16.9796
HSP90AA1	A0A452DI85;Q76LV2;A0AAA9ST28	28	21.3986	21.4314	21.1465	21.4604	21.601	21.5359	21.4217	21.52
MLYCD	A5PJC5	14	15.2585	15.047	15.8928	15.1562	15.5994	15.6437	15.7674	15.6773
CPT2	Q2KJB7;F1N1M7	26	16.6886	16.5575	17.5158	16.9157	17.0729	17.2835	17.2983	17.096
NCKAP1L	A0AAA9TQN4	4	14.0119	13.5382	13.4476	13.249	13.8914	13.813	13.9584	14.2732
UTRN	A0AAA9TJR2	100	17.8182	17.5082	18.2805	17.6105	17.4709	17.5942	17.4256	17.3434
RHOT2	Q5E9M9;A0AAF6YME1	7	14.2054	14.743	15.6348	14.5213	14.2896	14.1572	15.2461	14.687
SORBS2	A0A3Q1NDV3	32	18.6503	18.1516	18.813	18.9221	18.1675	18.3825	18.738	19.1045
RALGAPB	F1MCG4	14	15.4865	15.248	15.5465	15.4587	15.4128	15.396	15.3907	15.3587
UQCRC1	G1K1X0;P31800	15	17.7229	18.1758	19.1893	18.0159	18.0008	18.1563	18.5547	17.8851
MIDEAS	E1BI11	13	15.1131	14.6962	14.8694	14.8599	14.8682	14.8518	14.9683	14.8433
DOCK9	A0AAA9RS28	41	15.4054	15.5215	15.2858	15.5858	15.5306	15.4976	15.4468	15.4182
CSAD	E1BP41	11	17.007	17.2129	16.7775	16.9685	17.0766	16.9958	17.1549	17.3274
MYH10	Q27991;A0AAA9SL38	66	17.3432	16.8126	16.8227	16.885	16.744	16.3097	16.7928	16.586
SUGP2	E1BE55	22	17.7363	17.4863	17.816	17.7954	17.3885	17.6189	17.7952	17.6922
MAD1L1	A0A3Q1MWV1	23	20.4419	20.0248	20.0957	20.1309	20.1722	20.2501	19.9313	20.2249
ATP5PF	A0A452DJ42;P02721	3	15.7175	16.1398	17.7158	16.0635	16.1121	16.2262	16.487	16.2278
EHD2	Q2KJ47	24	19.9115	19.8724	19.1174	19.7025	19.4735	19.4841	19.0836	19.2868
HADHA	Q3SZ00	20	17.4761	17.3357	18.1532	17.5281	17.7321	17.9433	17.9954	17.7729
STK39	A0AAA9TJD5	5	14.8669	14.7514	15.2996	15.2732	14.8165	14.6091	14.9115	14.9117
NUP205	A0A3Q1N4S4	51	18.4173	18.1886	18.1682	18.1761	18.1542	18.2817	17.9514	18.0443
SORBS3	A0A3Q1M0U3	19	17.055	16.9419	16.4923	16.5929	16.6112	16.4424	16.2948	16.4086
ALDH1A2	G3X6U1	12	16.2419	16.4824	16.4186	15.8263	15.056	14.949	15.3126	15.4262
NHP2	Q5E950	4	16.5266	16.2064	16.7308	16.3521	16.2409	16.1211	16.306	16.5128
UBA2	A4FV12	23	18.0866	17.9308	17.5385	18.0218	18.1089	18.0121	17.9882	18.0797
STK24	A0AAA9TSZ5	10	16.8913	17.0063	16.8256	16.8667	16.9849	17.1157	17.0885	17.2184
GGTA1	P14769	6	11.8152	15.1274	13.837	13.7027	13.4381	13.3143	14.3247	13.8866
RPS6KA1	A0AAA9SJ92	21	17.0502	17.1039	16.9205	17.2404	17.0663	17.172	17.1218	17.4588
MORF4L2	A6H7C1	3	16.133	15.9397	16.2201	15.7703	16.1307	15.8686	15.9631	15.7498
DVL1	F1N6M9	4	14.271	14.228	14.6056	14.3098	14.4086	14.2455	14.1175	14.242
CORO1A	Q92176	13	17.1954	17.3376	17.0724	17.4977	17.8263	17.8131	17.5941	17.7076
POLR2H	F2Z4H3	4	17.7441	17.8769	17.8788	17.653	17.6888	17.6785	17.7505	17.7852
LRP2	F1N6H1	64	16.1373	17.9956	16.361	16.5851	16.1716	16.4227	17.0342	16.9662
THOC2	F1N153;G3MZE5	30	16.3902	16.2496	16.4041	16.2127	16.2242	16.4235	16.3883	16.4536
CDK6	E1BC36	8	14.6001	14.8114	14.6981	14.6752	14.6087	14.4432	14.5668	14.6319
EFEMP1	A0A3Q1MIU1	14	15.623	15.8073	15.8081	15.8094	15.7173	15.662	15.5102	15.806
EHD4	E1BJV0	16	17.0856	17.3078	16.533	17.1066	16.9864	16.9738	17.0698	17.2489
RALA	Q3ZCK2	5	16.27	16.1519	16.8454	16.429	16.5893	16.6148	16.6508	16.2156
RPS14	A0A3Q1MCJ7;A0A3Q1LNR2;F1MR01	5	18.8688	19.1791	19.0143	18.9563	18.9366	18.9718	18.8518	19.035
NPM1	E1BCL3;A0AAA9RVD2;Q3T160;A0A3Q1LR94	7	19.6618	19.6864	19.6507	19.4181	19.2347	19.2331	19.2171	19.362
HSD3B7	Q3MHF2	3	14.0127	13.594	14.9923	14.6026	14.6341	14.4432	14.1876	14.5398
PACSIN3	A0AAA9TSI6	6	15.5848	15.178	15.4225	14.9901	14.9711	14.7938	15.2317	15.4897
CHDH	E1BES2	17	16.1901	16.3941	17.4906	16.0294	16.0078	16.1603	17.0562	16.9494
AMBP	P00978;F1MMK9	15	19.1991	19.7973	18.7039	19.6482	20.306	20.4089	19.5858	19.623
SRGAP1	F1MFS4	5	14.5278	14.5948	14.2979	14.1615	14.1546	14.2194	13.9043	13.87
ZFYVE9	F1MKY4	11	14.5289	14.2227	14.102	14.7019	14.4798	14.5134	14.211	14.1455
TKDP4	F1MNL9;G3MYT1	4	13.2533	16.9228	16.3659	12.4708	NA	12.9777	15.7583	15.7431
NUP153	A0AAA9TXI1	32	18.0276	17.7109	18.0534	17.9847	17.9176	17.9685	17.8694	18.0135
MYOF	F1N3I4	81	16.4749	16.2036	16.9021	16.8619	16.2448	16.2183	16.6686	16.3928
CMTR1	A0AAA9S2X0;A2VE39	23	15.4602	15.4389	15.2632	15.3392	16.2429	16.2182	16.1918	16.2702
VAC14	F1MJZ1;A2VE70	21	16.6509	16.3074	16.6169	16.4877	16.5375	16.368	16.3775	16.5029
LAMA4	A0A3Q1N9E9	27	16.3194	15.6762	15.8157	15.7953	15.7574	15.1954	15.8565	15.401
SPINT2	Q2KJ54	7	14.5488	14.6419	15.9092	14.8967	14.2433	14.7575	14.866	14.7981
UPF1	E1BEK9	42	16.6447	16.6125	16.6444	16.6033	16.5917	16.4837	16.5118	16.5819
EGFLAM	A3KN33;A0AAA9SGV8	11	15.3079	15.2516	15.0892	15.0883	15.0639	14.6436	14.5869	14.4856
N4BP1	A0A3Q1ME40	7	14.4106	14.1395	13.8385	14.1597	14.6005	14.5475	14.2935	14.4538
GORASP2	F1MSB5	7	17.0152	17.1414	17.1466	17.1216	17.2045	17.1172	17.115	17.1314
PML	A0A3Q1M8R6	28	16.3069	15.3939	16.0328	16.2169	16.9375	16.8832	17.1602	17.1844
PAX2	A0A3Q1LYL1	2	14.792	13.7603	14.3806	14.4309	14.235	14.4782	14.5081	14.661
USP15	Q2HJE4	23	15.6614	16.0162	15.7491	15.783	15.7695	15.7211	15.8426	16.0335
PSMC4	Q3T030	19	16.837	16.7427	17.0644	16.6921	16.8221	16.7701	16.7379	16.907
NCBP3	E1BM89	7	14.7692	14.2693	14.4168	14.4684	14.4582	14.6855	14.7117	14.8395
SEPTIN9	A0A3Q1MB56	28	19.3814	19.1234	18.9785	19.1355	18.9559	18.7437	18.9837	18.933
SEPTIN7	Q6Q137	22	19.4178	18.9661	18.9348	19.0968	18.9409	18.6705	18.8855	18.8337
SEPTIN4	A0A3Q1MXU1	8	16.2107	15.5849	14.757	15.3362	15.4985	15.4584	15.4416	15.6048
ANXA8	Q95L54	18	18.3907	19.503	18.5836	18.8688	18.4836	18.5672	18.9772	19.0858
NUP98	E1BCV4	46	18.8979	18.546	18.8794	18.6271	18.7299	18.8603	18.578	18.5965
NUFIP2	A0AAA9TDA2	11	15.4901	15.3456	16.0624	15.3878	15.5851	15.6404	15.6537	15.6154
COG3	E1BGA6	20	15.9606	15.8258	15.9864	15.7209	16.0678	16.0329	15.9191	16.0128
EHMT1	A0A3Q1LPD0	4	14.1668	14.1161	13.9851	13.2137	13.8644	14.2325	13.6876	13.8882
BRD3	F1MMU3	8	15.0682	14.7071	14.2343	14.7541	14.8149	14.4502	14.4906	14.5961
DYNC2I1	A0AAA9RW32	10	14.5803	14.2994	14.4629	14.8038	14.4397	14.3251	14.4621	14.3194
DES	O62654	26	19.2358	19.1716	18.9532	20.9496	18.9221	18.2775	18.872	18.6439
PSMD9	Q3SZ19	7	17.7618	17.4773	17.4939	17.6963	18.0369	17.8397	17.97	17.9271
PTCD3	Q2KI62	9	14.2696	14.7851	15.5676	14.4275	14.2939	13.9731	14.8447	14.4764
GPHN	A0A3Q1N4F3	28	17.0702	17.2037	17.7113	17.4553	17.5598	17.5656	17.5985	17.7802
SSRP1	A0A3Q1MNI4	14	16.962	16.9636	17.0006	16.66	16.671	16.843	16.8286	16.6969
BZW2	A0AAA9RSW0	13	15.9549	16.3467	16.7723	16.036	16.0587	16.1045	16.2194	16.3593
AMACR	F1MCN8	2	16.9745	17.2936	17.7808	16.9194	17.0128	17.349	17.6552	17.2992
TRIM28	E1BJG5	22	19.0497	18.6957	18.6628	18.7442	18.7753	18.6301	18.6926	18.7152
HSPA14	Q2YDD0;G3MY73	9	14.8466	14.7756	14.534	14.7492	14.6921	14.7205	14.7326	14.7776
PARL	Q2KHV4;A0A452DJF2	3	12.6252	13.4335	13.7253	NA	12.924	NA	13.5204	13.3411
TFAM	Q0II87;E1BA21	6	16.7944	16.6474	17.2984	16.6444	16.9689	17.134	17.2897	17.2092
ATP6V1A	A0A452DJG1;P31404	24	18.4076	19.0887	18.6048	18.6333	18.6049	18.4427	18.5861	18.7241
LIMD1	G5E5X0	13	14.8806	14.7332	15.2667	14.5618	14.7876	14.7355	14.6626	14.6608
ENPP6	F1N5C8	10	16.8892	16.974	17.1961	17.6058	16.8829	16.2683	18.0849	17.2081
ENPP4	A2VDP5	5	15.8316	16.0943	16.7332	16.7358	16.302	16.6091	16.8387	16.7652
ESRP2	A0AAA9S204	9	16.4186	16.8116	16.7778	16.6945	16.7412	16.9208	16.7742	16.9941
SMARCE1	F6RNR1	8	15.9819	15.7447	16.0187	15.7076	15.7425	15.8194	15.7873	15.7107
TIMM8A	Q3ZBS8	4	17.0326	17.0339	17.6635	16.981	17.2064	17.3446	17.494	17.1931
RBM26	A0A3Q1MNU7	13	15.4452	15.308	15.3899	15.4184	15.515	15.2506	15.5031	15.5753
AGFG2	A0A3Q1M883	7	16.1245	16.1325	15.9234	16.2268	16.0988	15.8203	15.7667	16.0667
KRT7	Q29S21;A0A3Q1MKC8	29	21.0436	21.0077	20.9788	21.3845	21.5931	21.824	21.107	21.1618
PAPSS2	A0AAA9SX99	15	15.1545	15.2615	14.8959	15.0061	14.8742	14.8288	15.7227	16.0084
CCDC8	A0AAA9SDF5	5	15.4198	15.0662	14.8401	15.4182	14.4035	13.904	14.6391	14.2988
PKN1	A0AAF7AT19;A1A4I4	12	15.2962	14.9656	14.9074	15.092	15.1284	14.8796	15.1195	15.0908
VAV1	Q08DN7	17	15.0699	15.1965	15.4718	14.7046	15.5057	15.598	15.86	15.8096
ZZEF1	A0AAA9TUR4	28	14.023	14.4248	15.0383	14.0182	13.8866	13.9715	14.5966	14.7458
ASL	A0AAA9T703;Q3SZJ0	21	18.7607	19.2389	18.978	18.8405	18.861	18.7682	19.1494	19.2526
COMMD10	A4FUB5	7	15.952	15.666	15.8072	15.5515	15.8842	15.6093	15.8364	15.7888
RPS10	Q3T0F4	7	19.1233	19.4868	19.3778	19.2424	19.1295	19.2755	19.0419	19.1794
WBP2	E1BGX4	6	18.1585	18.1843	18.0761	18.4298	18.3291	18.5827	18.1406	18.4188
PXMP2	A0A452DI69;Q2KIY1	2	13.015	NA	14.2853	14.2282	14.2426	13.9236	14.581	13.8242
DNAJB2	A0AAA9TVG8	5	14.8833	14.9771	14.8153	14.9284	14.8167	14.4557	14.3698	14.3665
FLNA	F1N169	99	19.6995	19.5862	18.8596	20.0326	18.801	18.3815	18.7824	18.5686
TBC1D15	A0A3Q1MTW0	13	15.2326	15.3151	15.0685	15.4168	15.4663	15.3264	15.1621	15.1963
MVP	Q3SYU9;A0A3Q1MFD0	30	17.7788	17.5625	17.84	17.4475	17.6075	17.577	17.1203	17.2373
FADS6	A2VE15	4	14.5792	13.9503	14.559	14.2049	14.7763	14.9223	15.0708	14.3966
SPATS2	F1MK70;E1BKY8	11	16.4338	15.9107	16.4403	16.3529	16.1426	15.9125	15.9785	16.102
SIPA1	A0AAA9TDI5	8	14.3437	14.8359	14.5025	14.5284	14.4532	14.3516	14.4456	14.3972
EHBP1L1	E1BL45	6	14.1877	14.1634	13.9349	14.2232	14.3288	13.6724	13.6184	13.5983
COMMD9	Q2TBN5;F1MIC5	7	15.4686	15.722	15.5983	15.5521	15.3925	15.368	15.359	15.5822
KIF13B	A0A3Q1NM85	64	18.331	17.9296	18.6178	18.6481	18.657	18.6372	18.6867	18.6094
PCOLCE	Q2HJB6	17	16.8937	17.3226	17.3455	16.7715	16.8219	16.898	17.0433	16.8604
FASN	F1N647;Q71SP7	84	18.1972	20.1571	20.5848	18.5297	18.321	18.311	19.9953	20.2949
PALM	F1N3Q4	5	15.4916	15.1937	15.0843	15.3283	15.0052	14.6916	14.6179	14.6555
HNRNPUL1	F6Q807	16	18.8274	18.3766	18.3828	18.4926	18.3789	18.4431	18.3473	18.2775
DNAJC7	F1N7H0	13	15.3399	15.5942	15.3392	15.4037	15.4403	15.4739	15.481	15.5475
ACOT2	A0A3Q1MH73;A6QQA9	10	15.5998	15.5655	16.3321	15.8729	15.9864	16.1776	16.2307	16.1841
PAPLN	A0AAA9RVQ1	18	15.3416	15.1221	15.6298	14.6627	15.1668	15.1505	15.1022	14.8231
EP300	E1B8D6	4	15.3854	14.9032	15.1061	15.101	15.2995	15.1546	14.9503	15.1918
LOC515570	F1MF76	28	18.2505	18.7463	19.0163	18.7857	18.6329	18.7218	18.9128	18.5211
NOTCH2	F1MPE9	11	13.9191	13.7051	13.9831	14.011	14.0375	13.9749	14.176	13.7011
PARD3	A0A3Q1MT26	20	15.3459	15.1078	15.3757	15.4651	15.2921	15.4075	15.2702	15.3803
LUZP1	E1BKT0	12	15.7054	15.7221	15.7761	15.8007	15.6427	15.6617	15.654	15.7361
MARCKS	P12624	7	17.3559	17.7	17.0858	17.3496	17.4978	17.1649	17.636	17.4858
TBCA	P48427;A0A3Q1M6V1	11	17.8549	17.9288	16.7263	17.8327	17.976	18.0133	17.9756	18.0561
ANXA2	P04272	23	22.0263	21.965	21.74	21.6087	21.681	21.7686	21.7606	21.7632
RPS2	A0A3Q1MAT9;O18789;A0A3Q1LT23;A0A3Q1MBL4;A0AAA9S423	11	19.194	19.3651	19.3794	19.0895	19.1279	19.3131	19.2549	19.2177
ADO	G3MZK0	8	16.1381	16.0107	15.9639	16.2105	16.1019	16.3318	16.2116	16.2843
DSCC1	A0AAA9S5L7	2	NA	14.2513	14.4151	13.759	14.0794	13.8564	13.8549	13.8532
IFIT1	F1MM71	17	13.7197	13.4381	13.1136	13.1275	19.8418	19.7391	19.5694	19.4706
MYH14	A0AAA9S4Q7	83	17.7896	18.2445	18.8752	18.2737	18.5078	18.7919	18.4293	18.5517
PCNA	Q3ZBW4	7	16.8391	16.966	16.9356	16.656	16.9411	16.7526	16.8829	16.8938
DYNC1LI1	Q2KII9	18	16.6479	16.5059	16.6109	16.62	16.6981	16.5896	16.5571	16.5361
DFFB	Q58CZ0;A0AAA9TRD2	9	15.4028	15.1426	14.9067	15.0665	15.0288	15.2407	15.0283	15.0215
NPTN	A0A3Q1LL79	3	14.0765	14.7338	14.9868	14.3878	14.3285	14.4264	15.0612	14.4004
VCAM1	A7MBB0;Q9GKR3	2	NA	13.114	NA	13.3313	13.6948	13.8863	13.0078	13.3563
ARHGEF37	F1MJ96	16	15.2882	15.0241	15.48	15.4321	15.1819	15.2783	15.1435	15.3567
CHURC1	Q2HJG7;A0AAA9S2T1	2	14.896	15.2912	14.8472	15.0847	14.8214	14.5725	14.8254	14.6475
EPB41L3	E1B7S3	23	17.1179	16.5677	16.5434	16.9729	16.9694	16.8741	16.9548	16.6949
MED24	A0A3Q1MN23	10	14.0913	13.9302	14.0824	13.8529	13.873	13.9473	13.7909	13.9988
LAMA2	A0A3Q1MFB8	33	15.1545	15.3047	15.1432	15.1964	14.5262	14.3555	14.9481	14.7402
DSP	E1BKT9	108	17.4988	17.6362	17.6183	17.4267	17.4837	17.7058	17.5833	17.6451
CANX	A7Z066	23	18.585	18.8877	19.3887	19.2519	18.9541	19.0116	19.4302	19.0007
RALB	A5D977	5	16.4576	17.0119	16.7704	16.6631	16.8666	16.9942	16.5274	16.5219
RASAL1	A0A3Q1N802	7	15.0024	14.3851	14.2211	14.9563	14.4185	14.3132	14.2239	14.5508
DBNL	A0A452DIT4;A6H7G2	18	17.4269	17.6035	17.7209	17.272	17.6299	17.48	17.62	17.652
RAB25	Q58DW6	8	15.0109	16.0487	16.4377	15.5645	15.0471	15.1389	16.0183	15.8654
LMOD1	A4IFK3	10	16.8471	16.5275	16.1459	16.8496	16.0621	15.9265	16.0205	16.0044
NDUFV3	A0A3Q1N7L1;P25712	13	16.7752	16.5314	17.8802	16.7144	16.8495	17.0377	17.2782	16.9773
EPHX2	F6QS88	23	20.1884	19.7315	19.3664	20.1006	19.6168	19.5045	19.5003	20.2128
ARHGAP45	A0AAA9S2U6	7	15.7832	15.3738	15.4955	15.5129	16.0651	15.7782	15.8875	15.776
KCTD18	Q29RJ0	6	14.7619	14.5422	14.4854	14.4393	14.58	14.4467	14.3498	14.6032
TFIP11	Q29RR5;F1MR60	15	15.4355	15.1518	15.3737	15.1244	15.2338	15.4746	15.2022	15.1944
NUDCD1	E1BLF7	16	15.6686	15.7163	15.859	15.9145	15.4851	15.415	15.9158	15.9656
EXOSC9	Q3SWZ4;F1MB54	8	14.3902	14.821	14.6125	14.381	14.384	14.0686	14.2757	14.3179
RHOT1	Q2HJF8	6	13.9992	14.4182	15.1235	14.5815	14.5319	14.2523	15.0181	14.2654
UBTF	A0AAA9TQ73	18	16.7591	16.5547	16.6765	16.4617	16.4227	16.2923	16.5453	16.3323
SETD3	F6R2J7	10	14.9228	15.011	15.087	15.1287	14.9773	14.7624	14.9025	14.8389
ACAA1	Q3ZC41	13	18.1268	18.0828	18.6927	17.9541	18.2431	18.557	18.6131	18.5671
TBCC	Q3SZE9	10	16.0841	16.2264	16.0206	16.1581	16.3082	16.2755	16.1251	16.2617
RABEP2	A4FUG8	19	16.1821	15.8437	15.968	16.0001	16.1251	15.7935	15.9911	15.9205
DNM1L	Q2KIA5	27	17.0252	17.2144	17.3284	16.9973	16.9197	16.6934	16.8459	17.0587
NPL	Q29RY9	15	17.6604	17.372	17.4871	16.7457	17.277	17.3855	17.8449	17.9645
MED9	Q2KHX9	3	14.6639	13.9977	14.528	13.9849	14.3581	14.7564	14.6646	14.6225
COG4	A0AAF6YYF2;Q3MHG0	17	16.2867	16.3853	16.4528	16.0915	16.4572	16.4857	16.1296	16.273
PLEKHA6	E1BK42	16	17.2324	17.0099	17.2047	16.9199	17.0066	17.0361	17.0537	17.3518
C1QBP	Q3T0B6	4	20.1912	19.8417	20.838	20.5538	20.6459	20.7886	20.6638	20.1321
CKAP4	F1ME65	30	16.5986	17.3713	17.332	17.1616	16.8463	16.8422	17.5724	16.976
OGFOD1	Q3MI03	7	14.9604	14.6801	14.8008	14.4635	14.529	14.8427	14.3994	14.7173
TOP1	A0AAA9TV68	21	17.5832	17.5174	17.3246	17.3983	17.5802	17.5691	17.6215	17.7113
HDGFL2	F1MT65	8	18.9786	18.778	18.7848	18.8053	18.8186	18.6495	18.7603	18.7102
FUNDC2	Q8MJN0;A0AAF6Z380	7	15.6243	15.7595	16.3086	15.9924	16.1616	16.3279	16.5152	15.9127
CC2D1B	F1N7R5	12	14.7497	14.4996	14.2159	14.4416	14.3514	14.5079	14.4962	14.4505
ARHGDIA	P19803;A0A452DJ82	11	21.8748	22.0736	22.3256	21.9945	21.9792	21.9114	21.9262	22.0122
BMS1	E1BPP2	10	14.5573	14.6759	14.564	14.3212	14.3653	14.9017	14.4012	14.7481
ENOPH1	Q0VD27;A0AAA9TBH1	6	16.8953	16.9395	16.6159	16.9761	17.3131	17.0609	17.1079	17.0163
EXOSC8	Q2KHU3	7	15.6662	15.7932	15.3483	15.6337	15.5918	15.6575	15.2139	15.7502
PHF6	A0AAF6Z126;Q08DR0	7	14.9646	15.0422	14.9014	14.7371	14.7983	14.8869	14.5482	14.8426
TAF6	Q58DG7	8	14.3467	14.0086	14.2447	14.0869	14.3744	14.4881	14.256	14.2768
HEATR5A	E1BGU0	7	13.7438	13.9705	13.4861	13.5861	13.0973	13.5766	13.8866	13.6531
S100A11	A0AAA9TWM3	3	20.4334	20.4738	20.3731	19.9936	20.9239	20.9408	20.8281	20.8971
PLS1	A6H742	21	16.0383	16.2464	16.4116	16.4471	16.5478	16.5037	16.4713	16.5913
ARHGEF5	F1N2G5	18	14.7727	14.7328	15.2239	14.7399	15.0583	15.1895	15.0903	15.2707
FIP1L1	E1BKM0	7	19.0818	18.6595	19.1709	19.0248	19.0459	19.1718	18.9758	19.1126
SMARCD1	Q2TBN1;F1MTG9	6	14.8472	14.5364	14.8642	14.6808	14.4346	14.6937	14.5888	14.3988
BASP1	P80724	11	19.2491	19.6226	19.6571	19.289	19.5076	19.3823	19.647	19.5417
NECTIN4	Q5E9Z9;A0AAA9SRB3	8	14.2257	14.0488	14.4561	14.2627	14.393	14.5567	14.6883	14.6938
PRR14	A0A452DJ07;Q0VBZ8	8	14.6817	14.2226	14.6313	14.0395	14.2758	14.2747	14.3477	13.9992
FUBP3	A6QP83	11	18.3022	18.2693	18.3624	18.4337	18.4968	18.3621	18.4762	18.4913
TUT1	Q1JPD6;A0A3Q1MNQ1	3	19.4105	19.5501	19.443	19.3934	19.4183	19.366	19.3755	19.4592
LRPAP1	A0A3Q1MD85	7	16.1745	16.6175	16.7871	16.0937	16.0505	15.8796	16.2835	16.1965
IDE	A0AAA9U0H2;Q24K02	26	16.5006	16.7174	16.6611	16.5381	16.6771	16.6131	16.8554	16.8572
RPL13A	Q3SZ90	5	18.3104	18.7512	18.8479	18.3855	18.3583	18.5569	18.6958	18.3357
PKM	A0AAA9RXQ2	29	21.3645	21.6505	21.3401	21.3918	21.4114	21.1875	21.3282	21.3885
ABCF3	A0AAF6DM45	9	15.4606	15.8123	16.2398	15.5147	15.1859	15.0337	15.4327	15.5781
ATAD3	A7YWC4	16	15.4269	15.7525	16.7521	15.8825	15.9649	16.1988	16.3805	15.7847
FAM120A	A0A3Q1MFI2;A6H7H1	31	17.1421	16.772	16.9641	16.974	16.8564	16.8708	16.7767	16.8999
BCAM	Q9MZ08	17	19.0447	19.4752	19.5747	19.1371	19.4962	19.662	19.3953	19.3087
ADAMTS13	A0A3Q1M0L5	16	15.0061	15.7752	15.5181	15.2214	15.8381	15.5609	15.2043	15.187
PPP5C	F1N719	13	15.8689	16.1407	16.1314	16.249	16.1226	16.0945	16.1841	16.2762
GIT1	A0A3Q1M7Q3	13	15.7081	15.8696	15.6506	15.821	15.6149	15.5699	15.7488	15.6754
GCC2	E1BB16	22	15.1252	15.1962	15.3028	15.1097	15.1331	15.4315	15.27	15.2054
LMNB1	A7YY47	36	19.6465	19.2348	19.5462	19.5311	19.7607	19.8584	19.6732	19.6721
TARS1	Q3ZBV8	33	17.8401	17.9817	17.9101	18.0637	18.0897	17.9242	18.1407	18.2139
MPRIP	A0A3Q1LSA5	26	15.8334	15.7489	16.1777	15.9846	15.763	15.6373	16.0289	16.0172
CMAS	Q3SZM5	19	18.1898	17.6883	17.6343	17.8721	17.9148	17.8015	17.9104	17.9747
PRRC2C	G3X6B2	20	17.1573	17.0963	17.2611	17.1896	17.2997	17.2875	17.2177	17.2401
SMPDL3B	A6QQN6	9	15.0149	15.4295	15.9709	16.0225	15.4228	15.4151	15.8363	15.4209
MORC3	F1MFY1	17	15.8355	15.5518	15.7849	15.697	16.1545	16.1512	16.3637	16.4127
RALBP1	F1MPV3	4	17.4828	17.4174	17.4325	17.4854	17.4572	17.4422	17.3112	17.6085
FLNC	A0A3Q1LV98	75	17.1158	17.516	16.5702	17.3231	16.5566	16.1483	16.6247	16.6039
E2F4	F1MBE6	4	13.2319	12.8767	12.7679	12.9306	12.5727	12.7433	12.3516	12.428
TM9SF2	F1N672	9	15.7689	16.8218	17.3215	16.5035	16.4249	16.5487	17.0113	16.5349
PLD1	A0A3Q1LL74	12	13.7656	14.2261	15.4947	14.1456	14.2107	14.2047	15.0032	14.6302
KIF3B	F1N020	6	15.21	15.0256	14.7108	15.2156	14.8637	14.777	14.7503	15.0111
ALDH18A1	Q2KJH7	27	17.0892	17.1748	17.7694	18.4204	17.927	18.1581	18.2299	17.9256
VPS25	A0AAF6Z7J4;Q5E9A6	11	17.3187	17.6056	17.2961	17.6962	17.553	17.4026	17.1892	17.474
RAPGEF2	F1MSG6;A0A3Q1N0F9	6	16.2826	15.8308	16.1135	16.3213	16.8921	16.5888	16.1575	15.9356
RCN3	Q2KJ39;A0A3Q1NEH4	10	17.3702	17.5169	17.4475	17.2653	17.1696	16.8264	16.8352	16.8378
RNF214	F1MLH7	6	14.9626	14.408	14.7404	14.7772	14.9684	14.5235	14.5547	14.6761
POLR2A	G3MZY8	32	18.062	17.7518	17.9811	17.5641	17.7041	17.7535	17.7631	17.8666
KATNB1	A6QQU1	6	13.6955	13.5481	13.4639	13.7803	13.7807	13.2129	13.9645	13.6384
EIF1AD	A0AAF6Z7A4;Q58CY2	5	13.8483	14.2313	14.6205	13.8513	13.8797	13.4252	13.5313	14.0099
ATIC	Q0VCK0;A0AAF6Z6Q7	30	19.5653	19.7567	19.9352	19.8476	19.7817	19.698	19.8698	19.9604
DCTN1	A0A3Q1LJA4	43	17.0995	16.9649	17.0114	17.1138	17.1502	16.9651	16.9004	16.9409
CSPG4	F1MY84	15	16.7884	16.6173	16.7231	16.7639	16.5881	16.3583	16.9563	16.5088
TBP	A0AAF6ZDS6;Q2HJ52;F1MKV5	2	13.8593	14.3978	14.4419	14.4801	14.4254	14.4105	14.2389	14.2318
RBPMS	A0AAA9SL39	4	15.6069	15.5434	14.9193	14.8956	14.8387	14.545	14.8072	14.6984
TECPR2	A0AAA9TKT9	13	15.5741	15.3004	15.5689	15.7483	15.5482	15.504	15.2433	15.3538
SLC27A5	A6QM10	16	16.7406	16.7372	18.3368	17.1561	16.8605	17.0177	17.7753	17.338
INTS10	A5PJT2	12	15.0226	14.6517	14.898	14.7895	14.9128	15.0318	14.8722	14.907
ZHX3	E1BGF9	8	15.8568	15.0162	15.2521	15.0371	14.6555	14.3892	15.1863	15.0819
SFPQ	E1BQ37	23	20.5611	20.2898	20.0705	20.4341	20.4499	20.4986	20.3325	20.435
PSPC1	Q1LZD9;A0AAF6YLV5	13	19.5637	19.0428	19.1282	19.1951	19.3072	19.3255	19.3011	19.2393
PRP4K	Q08DZ2;A0A3Q1MNY8	17	16.5543	16.0131	16.0659	16.1666	16.1932	16.3451	16.3065	16.3359
RSPH9	Q2KIU7	6	14.4942	14.309	14.8678	14.1112	14.5857	14.93	14.7677	14.887
CCDC6	F1N091	22	16.3167	16.2394	16.8015	16.8367	16.7555	16.6336	17.0114	17.0638
GPC1	G3X745;A0A452DIL6	13	15.0567	15.1046	15.0479	15.0627	14.9134	14.9073	15.2873	14.8097
XPO6	F1MI29	8	13.8948	14.1431	14.1405	14.178	13.9694	14.1202	13.7635	14.0396
UTP20	E1BGE2	11	13.9545	14.1581	14.5844	14.3224	14.0969	14.1268	13.8812	14.0856
SPTBN1	A0A3Q1MXU7	92	19.7147	19.182	19.316	19.5667	19.3477	19.2088	19.3083	19.1114
IDI1	Q1LZ95;A0A140T853	15	16.5816	16.7027	16.9865	16.5734	17.093	17.2448	16.7971	16.8665
SMC3	O97594;A7Z065	44	17.0115	16.6979	16.7317	16.8239	16.8583	17.0077	16.8234	16.8408
DNAJC13	F1MDR7	40	15.6457	15.7529	16.0709	15.5368	15.5636	15.4799	15.544	15.5657
NELFB	G5E5S2	23	18.4837	18.424	18.4035	18.478	18.4725	18.4251	18.3475	18.292
VMAC	A7YWC8	4	15.5833	15.2673	15.174	15.5687	15.3993	15.2597	15.5296	15.5718
BNIP1	F1N353	4	15.2172	15.1488	15.9449	15.6559	15.5924	15.7519	15.7277	15.3839
SSB	P10881	23	18.0095	18.1102	17.8173	18.104	18.0475	18.0268	17.9979	18.1358
RPS3	Q3T169;A0AAA9TQX8	12	20.1605	20.3337	20.4115	20.1193	20.0671	20.1295	20.063	20.1201
STRN	A0A3Q1MGW7	19	16.1464	16.1292	16.0039	16.1961	16.1537	16.1159	16.1853	16.22
SYNM	E1BIS6	27	14.8798	14.6369	14.6592	15.7403	14.6581	14.1003	14.4133	14.4859
PLOD1	G8JKV7;O77588	16	17.1153	17.2541	17.2504	17.1365	16.6665	16.3461	16.7166	16.4414
COL6A3	E1BB91	93	18.1165	18.2188	17.8713	18.7313	18.5584	17.6877	18.6108	17.6879
SMPD2	F1N588	8	15.976	14.1949	16.1505	15.8397	15.7645	15.7692	NA	15.6945
ZFHX3	E1BPV9	2	NA	NA	NA	11.5923	10.9398	NA	11.6018	11.7822
RUFY1	A0AAA9S3N9	13	17.3338	17.2456	17.2123	17.202	17.066	16.9376	17.3247	17.1597
MED16	G5E6J3	9	15.4358	15.314	15.4149	15.3366	15.3551	15.4423	15.4956	15.5573
PSMD11	Q2KI42;A0A3Q1MDI3	18	17.6738	17.6472	17.6798	17.5295	17.7677	17.7387	17.7072	17.6916
EXOC2	E1BDW9	29	15.7304	15.5173	15.5689	15.5423	15.6528	15.5109	15.7147	15.541
CACYBP	Q3T168	13	18.0853	18.0864	17.9647	18.0484	18.1749	18.0481	17.9935	18.1214
MON2	A0AAA9T6Y7	26	15.8575	16.1648	16.4012	15.7565	15.7341	15.6702	15.9653	16.0521
DCAF1	A0A3Q1LW88	23	16.9292	16.6471	17.0318	16.6983	16.9109	17.0351	16.7961	16.7975
NASP	A0A3Q1M1D3;Q2T9P4	26	18.3776	18.5956	18.4151	18.5554	18.5631	18.424	18.6258	18.7403
TPD52L1	Q0VBY4	7	16.2552	15.695	15.1456	16.2638	15.3622	15.592	15.4443	16.2276
SIN3A	F1MTR3	24	15.6036	15.1956	15.4058	15.3471	15.2657	15.4405	15.4732	15.4237
ACSS2	A0A3Q1MB37	18	16.9674	16.5	17.1616	17.5401	17.4441	17.5295	17.1786	17.1506
ALDH6A1	Q07536;F1N7K8	20	17.9511	17.5508	17.8389	17.9653	18.0981	18.1761	18.3171	18.2665
MYH11	A0A3Q1LWN6	73	17.0218	16.9385	17.6386	19.7171	16.1241	16.2422	16.6901	16.3565
LSG1	A0A3Q1MV30;Q2YDM7	6	14.4592	14.5527	14.5838	14.2166	14.5203	14.7838	14.3276	14.5752
NCALD	P61602	4	16.1918	16.5918	16.4998	16.9344	17.1276	16.5358	16.8272	16.0821
CCZ1	Q0VD30	12	16.9463	17.0395	16.8991	17.0863	16.984	16.9556	16.9553	16.9411
SCPEP1	Q2NKZ9	7	15.7096	16.3252	15.3995	15.9637	15.9818	15.7635	15.6741	15.7528
ATP13A1	F1MYA8	25	14.5167	14.8974	15.3194	14.8472	14.862	14.9233	15.1303	14.6428
GATM	Q2HJ74	14	16.5637	18.2792	18.8847	15.912	15.9863	16.2188	17.7981	18.0376
BCAP31	Q5E9F1	9	17.9035	18.1034	18.7477	18.3384	18.3049	18.4142	18.5565	18.113
ARPC4	Q148J6	6	20.1082	20.1581	20.2293	19.9693	20.1587	20.0412	20.1463	20.2206
IGF1R	G1K218;Q05688	10	14.4765	14.512	14.9175	15.1943	15.0181	15.0723	14.8514	14.6384
TM9SF4	A5D7E2	6	14.5347	15.3171	15.9935	15.3357	14.7992	15.0535	15.2679	14.8719
HEXIM1	Q0X0C4	7	16.4102	16.3986	16.0714	16.1282	16.125	16.2165	16.3249	16.4021
LPCAT4	A0AAA9SAW2	9	12.8724	14.2436	14.3555	12.8279	12.9971	13.4549	14.2381	13.8597
CCDC170	A0AAA9S743	8	14.2682	14.0166	14.398	13.9304	14.1548	14.5859	14.3169	14.062
LRPPRC	A0AAA9SR44	53	16.2611	16.9302	17.8275	16.6266	16.1368	16.2182	17.0523	16.715
NSF	A0A3Q1MR04	26	17.9363	17.7797	17.5622	17.862	17.8902	17.85	17.7771	17.871
MICAL2	F1MF74;A0A3Q1MTT2	4	13.4801	13.6686	14.0786	13.3061	13.3546	13.3934	13.7264	13.7446
OTUD4	E1BN58	6	13.9591	13.6279	14.0928	14.0054	14.1028	13.8835	14.2437	14.1858
PRRC2A	E1BAF6	22	16.2294	16.2451	16.5454	16.2867	16.393	16.3022	16.2375	16.2482
SLC35B2	Q3ZBB0	6	14.3285	14.8865	15.2844	14.9781	15.0732	15.2521	15.3366	15.0111
RTN4	F1N405	14	17.0182	17.2947	17.3358	17.4225	17.4824	17.6157	17.6176	17.2101
MTMR6	E1BJH8	23	14.7317	14.8977	14.8728	14.8278	14.7364	14.7112	14.6012	14.7806
IARS1	A7MBC5	39	16.774	16.7996	16.8944	16.8385	16.8436	16.7841	16.8044	16.7945
DIABLO	A0AAA9T9X9	3	17.6481	17.2938	17.8463	17.2876	17.4973	17.611	17.711	17.5762
FOLR1	P02702;A0A3Q1MRP4	7	15.6743	16.9455	16.8861	16.0286	14.9267	14.6522	16.8207	16.6195
EIF3B	A7MB16	24	17.7139	17.8765	18.0045	17.6997	17.6552	17.617	17.7868	17.8116
LPGAT1	A0A3Q1LJ78	6	12.8559	13.801	14.3394	13.5343	13.4117	13.4652	13.9976	13.537
CHORDC1	Q29RL2	7	15.4069	15.9687	15.6602	16.008	16.1574	16.1438	15.9454	16.056
ILF3	F1MMA0	23	18.9405	18.6454	18.6456	18.7004	18.7314	18.763	18.689	18.7299
OGFR	F6RA54	10	15.5501	15.2928	15.6915	15.5934	15.9492	15.7265	15.6822	15.6747
PLSCR3	A0AAA9RZG2	2	13.665	14.2877	14.2797	14.2626	14.639	14.5333	14.8181	14.3076
USP47	A0A3Q1NK97	29	16.3011	16.1988	16.0852	16.2297	16.2208	16.0932	16.046	16.0258
PCM1	A0A3Q1LX22	20	14.7948	14.4601	14.6855	14.5669	14.441	14.7435	14.5666	14.4893
ELP1	A0A3Q1M6R3	21	16.0391	15.9352	16.2063	15.8858	16.0817	15.9479	15.9225	16.0806
LRRFIP2	E1BBW0;Q2T9W6	10	16.1116	15.9107	16.483	16.1772	16.3443	16.3376	16.2225	16.3273
METTL3	F1MX80	18	17.2549	16.9343	17.0654	17.1194	17.032	16.9142	17.1485	17.0367
PIP4K2B	F1MHT2	9	16.167	16.3791	15.872	16.259	16.0743	15.9213	15.8848	16.0637
SNX29	Q08DX0;A0A3Q1N0T4	4	14.4954	14.5613	14.6625	14.6069	13.9995	14.4219	14.5594	14.5053
SERPINB12	E1BDF5	16	17.3288	15.3202	17.3711	17.887	16.7635	16.73	17.0912	17.7268
OGDH	Q148N0;A0AAF6YPM1	37	18.6635	18.536	19.2443	18.8348	19.2033	19.3728	19.1929	18.8835
DIAPH1	A0A3Q1LUD9	34	15.9528	16.3944	16.7194	16.3852	16.2687	16.1774	16.4715	16.7168
STOML2	Q32LL2;A5PJA6	16	16.9425	16.9431	17.8926	17.1162	17.0877	17.2684	17.3496	17.1143
TJP3	A0A3Q1MSB9	13	15.5535	15.4844	16.0367	15.7329	15.7409	15.908	15.8293	15.7611
LUC7L	F1MMH3	3	15.5874	15.7833	15.9055	15.7394	15.514	15.6662	15.8966	15.8417
TJP2	A0A3Q1MPV5	33	17.3556	17.4167	17.6128	17.3742	17.6402	17.7967	17.4548	17.6515
SP2	A0AAA9S4T0;Q5E9U0	2	12.9127	12.7805	12.914	13.1142	12.8982	12.8745	12.6682	12.4014
RMDN1	Q32KL4;A0AAA9T0I3;F1MFW0	7	16.108	16.1361	16.5115	15.9367	16.1869	16.1743	15.9441	16.1916
CCDC174	A0AAA9T157	2	12.8663	12.881	NA	12.7915	12.3596	12.9866	12.8002	12.8459
ZBP1	F1MQT4	10	15.7819	15.7294	15.8484	14.8901	18.7185	18.665	18.6504	18.6204
DPY19L1	F1N3H6	4	12.6846	12.9896	13.5584	12.9793	12.4504	12.0021	13.334	13.1725
USP10	A5PJS6;A0AAF6YU44	13	15.2985	15.2574	15.5918	15.3774	15.4767	15.5577	15.4987	15.5707
LOC112445002	A0AAA9SRZ1;A0A3Q1ML81	7	15.9801	15.2186	15.5018	15.8099	15.6933	15.6897	15.4523	15.4153
F11	F1MUT4;Q5NTB3	7	13.4565	13.9538	13.7777	13.6512	14.5901	14.4719	13.5149	13.9115
PLS3	A7E3Q8	21	18.2955	18.1294	18.3537	18.4182	18.3995	18.2786	18.2082	18.3781
WDR44	Q9XSC3	21	15.5738	15.8189	15.3814	15.6677	15.794	15.4958	15.6167	15.6264
SYNJ1	A0A3Q1MIH5;O18964	22	14.7434	14.6223	14.8783	14.994	14.4683	14.6142	14.6245	14.6787
TPR	A0AAA9T4R9	72	17.4953	17.1872	17.5998	17.2406	17.5075	17.702	17.2611	17.3708
PPL	F1N2K8	60	18.0528	17.8057	17.9754	18.2247	18.4005	18.5182	18.3643	18.328
CRYBG1	E1BH02	14	14.9861	13.9617	14.2783	14.2847	14.9557	14.8096	14.4575	14.5544
GPS1	A0AAA9S1F3	14	16.7631	16.6054	16.7412	16.7817	16.7094	16.5683	16.6026	16.6196
DPP3	A0AAA9T7D8	23	17.7458	18.0345	17.8672	17.8452	17.8156	17.7467	17.8695	18.0211
SCAF4	A0A3Q1MTL1	4	14.5182	14.1069	13.8926	14.2374	14.2379	14.0541	14.3267	14.2235
DMAP1	Q1LZ99	8	15.8976	15.6609	16.0347	15.8731	15.8141	15.9777	15.7782	15.8716
SARS2	A0AAA9SXU5;Q9N0F3	21	15.0926	14.9419	16.0121	15.3043	15.5176	15.508	15.6037	15.3353
MAP1B	A0A3Q1MTY6	30	15.8932	15.2061	15.1821	15.3268	15.2977	14.672	14.5568	14.4281
TRAF3IP1	A0AAA9TZY6	3	14.0984	13.8578	13.9917	13.7232	13.5377	13.9996	13.6383	14.1089
SEH1L	A7YY75	13	16.5906	16.1833	16.2943	16.1468	16.0771	16.2481	15.9928	16.0407
LAMB2	E1BDK6	31	16.6454	16.4641	16.453	16.0907	15.7279	15.4674	16.5675	16.1916
UBA3	A0A3Q1M200	11	16.5551	16.5255	16.2361	16.3687	16.3242	16.2846	16.3297	16.3032
AHNAK2	A0A3Q1MK97	18	16.731	16.5817	16.7944	17.0223	16.6238	16.1636	16.5781	16.3189
ODF2	Q2T9U2;F1MU43	15	15.1512	15.0043	15.2302	14.9542	14.9883	15.3006	15.0412	15.1399
OPTN	Q3ZC32	17	15.9608	16.5268	16.8409	15.8319	16.1911	16.059	16.4979	16.7478
GET4	Q0P5I8	5	15.4847	15.4202	15.6212	15.638	15.5043	15.6076	15.4999	15.5638
SF3B3	A0JN52	37	17.7366	17.4968	17.6931	17.4148	17.5484	17.7319	17.4275	17.5862
APRT	A0A452DIE3;Q56JW4	7	19.3479	19.4792	19.2072	19.2718	19.761	19.6824	19.5908	19.5817
BZW1	F1MZK4	11	16.2681	16.6711	16.2846	16.2949	16.2725	16.3769	16.3743	16.3967
SYMPK	E1BJF6	22	15.696	15.5487	15.9498	15.5208	15.6424	15.6838	15.652	15.746
LRBA	A0A3Q1MGD3	61	18.0044	17.6202	18.0106	18.4881	18.1794	18.2407	17.7907	17.877
NTAN1	A0A3Q1NBY0	5	14.6295	14.879	14.5647	14.4118	14.9785	14.8268	14.5163	14.7759
ARMT1	A3KMX8;F1MC76	15	18.1839	18.2081	17.6032	18.713	18.2832	18.1543	18.2024	18.6271
GARS1	A5D7A2	23	17.7833	17.7602	18.2141	18.296	18.2801	18.0837	18.6563	18.7347
USP43	E1BKF4	8	14.3419	NA	15.5438	14.4155	14.5942	14.5934	15.0691	14.8417
THOC5	A4IFQ0;F1MS93	16	16.3897	16.4393	16.356	16.2989	16.3366	16.4665	16.1058	16.3139
KCNAB2	Q27955;A0A452DJB7	4	14.5745	14.3863	14.0341	14.5733	14.598	14.2501	14.2176	14.026
GHITM	Q3SZK3	4	16.2916	16.7036	17.1951	17.0895	16.8915	17.0152	17.09	16.3492
ANKHD1	A0A3Q1M7L2	17	15.2578	15.355	15.5642	15.3306	15.5515	15.5857	15.4835	15.535
UBR3	F1MQK6	8	14.2251	14.5066	14.6847	14.3482	14.3081	14.2894	13.9571	14.1888
RABGAP1L	F6QEG6	15	14.3972	14.7117	14.9991	14.8017	14.5274	14.4041	14.4994	14.5146
TSR2	Q3T090;A0A452DIP4	3	15.3992	15.6516	15.9458	15.7826	15.6526	15.5325	15.7051	15.6523
AASDHPPT	A0A3Q1LL63;G3MZI2	10	16.6807	17.4238	17.3637	17.0445	16.54	16.5739	16.5999	16.7891
LPIN3	E1BLQ9	4	14.1741	14.5831	14.1463	14.5164	14.2948	14.287	14.6927	14.5797
PTPN12	A0A3Q1M0B4	16	15.3146	15.3575	15.0599	15.1018	15.1997	15.2397	15.0689	15.3592
AOC1	Q3MHQ1	5	14.9212	14.8709	15.175	14.695	14.7136	14.4453	14.6455	15.106
ZNF800	E1BPK3	5	14.3073	13.9822	14.5611	14.57	14.7534	15.1041	14.4775	14.4664
GMIP	A0AAA9SMC0	5	13.6574	13.6527	14.2394	13.5331	14.0087	13.9015	14.3567	14.4431
RDX	Q32LP2	20	18.3171	18.3428	17.8555	18.2547	18.3108	18.2716	18.2313	18.42
OCRL	A0AAA9U0Y4	14	15.3735	15.2028	15.0838	15.4154	15.147	15.0408	15.024	15.0994
ANKLE2	A0A3Q1LKM4	20	15.188	15.156	15.4395	15.2421	15.2347	15.1769	15.2825	15.1213
NAA15	A0AAA9RY84	21	17.5742	17.9751	17.8575	17.6816	17.6827	17.6892	17.8654	18.0661
IGFALS	A0AAA9TBM6	20	16.3893	17.3393	16.4247	17.0216	17.1544	17.2107	16.8407	16.8747
CHCHD3	Q5E9D3	9	17.0579	17.0417	18.4362	17.3808	17.2504	17.3897	17.8841	17.5383
NAPRT	A5PK51;F1N3B0	14	16.1812	16.4544	16.4219	16.9583	16.5623	16.5536	16.9846	17.1887
CDC42BPB	E1BP72	42	19.1616	19.0266	19.2734	19.2292	19.0534	19.0517	19.1649	19.2838
RBM27	A0A3Q1NNK5	5	14.0788	13.764	13.8979	13.6859	13.7586	13.5869	13.5982	13.7762
HIBCH	Q2HJ73;F1MPK4	13	18.283	17.8547	18.6283	18.4002	18.6493	18.7473	18.7248	18.4376
ABHD1	Q3T0A0	5	15.8017	15.1898	16.4059	16.1044	16.645	16.5928	16.6551	16.0445
SNX16	A0A3Q1MTG5	3	14.1864	14.3557	14.6185	14.4155	14.5719	14.4333	14.7237	14.5854
LOC112443783	A0A3Q1N864	2	14.1233	13.7476	14.0526	13.959	14.1395	13.7217	13.8744	14.0613
ZNF330	Q32LC9;E1BD90	4	13.6435	13.9527	13.6943	14.0039	13.5891	13.5653	13.7692	13.8288
NRDC	A0A3Q1LY70	11	16.1763	16.8037	16.474	16.3987	16.2402	16.1704	16.4544	16.3435
SPAG9	A0A3Q1LP94	31	16.5196	16.5001	16.3844	16.457	16.4474	16.3872	16.3507	16.4395
NOL6	A5PJU0	9	13.7584	14.0105	14.2332	13.8197	13.6132	13.6638	13.7662	13.9648
C5	F1MY85;P12082	45	17.8391	18.6092	17.708	18.8212	18.7035	18.6938	18.4106	18.4489
GALC	A0AAA9SDL9	12	14.893	14.8034	15.1197	15.4976	15.3367	15.1428	14.9227	14.9132
MRPS23	A0A3Q1M7M3;Q2NL27	4	16.8916	17.4286	17.964	16.8439	16.6833	16.8237	17.2989	16.9612
LNPEP	A0A3Q1LSE7	14	14.7937	15.288	15.3161	14.7368	15.2552	15.4271	15.3904	15.0908
NDUFB10	Q02373	8	16.0279	16.4101	17.5494	16.48	16.2847	16.1867	16.9945	16.2701
APAF1	A0A3Q1LZZ2	16	17.3165	17.2749	17.332	17.4593	17.4245	17.2967	17.4752	17.5509
TXNRD2	Q9N2I8	16	15.8018	15.3252	16.3156	15.7781	16.3368	16.4626	16.2645	16.0626
ACLY	Q32PF2	42	18.6022	18.8552	18.8747	19.054	18.867	18.8484	18.8744	18.9238
EEF2K	E1BEM1	7	19.2445	19.2424	19.0381	19.272	19.3619	18.8792	19.2727	19.4753
OLA1	A0A3Q1LZU5;Q2HJ33	18	17.7879	17.975	17.7702	17.9667	17.943	17.9082	17.9165	17.9485
ECE1	P42891	10	14.9793	14.6201	15.3229	15.1334	15.4742	15.4656	15.1797	14.863
HMOX2	F1MTY9	15	18.0483	18.1344	19.3685	18.5172	18.5893	18.6562	18.7996	18.4345
ORC4	Q2YDI2	6	14.25	13.9765	14.0427	13.7734	14.1285	14.1391	13.9562	13.7502
LLGL2	A0AAA9SWS7	26	16.4938	17.1516	17.1781	16.5229	16.4288	16.4232	16.764	17.1121
PCCB	A0A3Q1LPE3;Q2TBR0	21	17.1835	16.9351	17.9951	17.4209	17.8827	18.086	17.7125	17.3695
LMO7	A0A3Q1M7E1	47	16.2135	16.0484	16.479	16.3164	16.2556	16.4277	16.32	16.4658
SGPL1	A5D788	10	16.7258	16.8538	17.2276	17.1835	17.1885	17.2137	17.0775	16.5285
SNX21	A0A3Q1LUX4	7	14.5395	13.9522	14.7818	14.5362	14.7007	14.5979	14.2993	14.2257
CRTC3	F1N1Z3	6	13.3794	13.1524	13.2853	13.325	13.5995	13.6264	13.091	13.6106
ARHGAP5	E1BM23	18	14.8662	14.9838	14.7675	14.8308	14.8141	14.7466	14.8655	14.805
PGAP1	A0AAA9SE06	5	12.9634	12.6811	13.7974	12.6497	13.2028	13.3386	13.1743	13.0857
PIGS	A0AAA9RZX1;Q3SZL5	6	14.0747	14.0039	14.9463	14.221	14.2072	13.8992	14.7408	14.1054
NPEPPS	E1BP91	35	18.4152	18.5386	18.0692	18.4868	18.558	18.3928	18.4862	18.5498
ST14	A0AAA9SRJ3;Q0IIH7	18	18.0287	17.752	18.1182	18.2033	18.3939	18.5533	18.5342	18.1671
PADI2	A0AAA9SRB9	13	14.8569	14.955	14.817	14.4562	14.7063	14.5919	14.5032	14.6105
GMPR2	A0AAA9SH20;Q32L93	15	18.1636	17.986	17.7379	18.2238	18.227	18.0692	18.0942	18.1704
PICK1	A0A3Q1MC64;Q2T9M1	5	15.3809	15.2389	15.9083	15.8471	16.0058	15.8935	16.0994	16.0275
CTBP1	A0A3Q1M504	8	17.246	17.0208	17.1491	17.2638	17.1597	17.2427	17.1774	17.1094
OTUB1	Q3T0Y1	14	17.8042	17.839	17.638	17.8858	17.8724	17.6923	17.6458	17.7524
CTBP2	Q0VCQ1	8	19.0242	18.6703	18.7688	18.9672	18.8656	18.845	18.7257	18.8247
FN3K	A0AAA9TNS6	3	15.4092	15.6154	15.365	15.413	15.723	15.2679	15.3013	14.9372
CUL4B	A0AAA9T9F6	23	17.6668	17.4085	17.5382	17.7987	17.909	17.8028	17.7874	17.7793
KYAT1	A0AAA9S4Y7	9	15.0219	15.034	15.3427	14.9172	15.3246	15.0689	15.4181	15.4515
DAB2	A0A3Q1LSX5	8	15.013	15.9238	15.3142	14.7149	14.7753	14.8875	14.9935	15.0233
SRSF3	Q3SZR8;A0AAA9SK06	3	20.1834	20.0275	19.6083	19.7909	20.2406	20.6477	20.2003	20.3974
XYLB	A0A3Q1LRL7;Q3SYZ6	12	15.568	15.6821	15.2647	15.7235	15.7824	15.7834	15.5916	15.7591
TCP1	Q32L40;G5E531	26	18.6384	18.6128	18.6537	18.5823	18.6755	18.7434	18.5827	18.7878
ACBD3	F1MRE5	17	16.4154	16.6051	16.6851	16.3398	16.4781	16.5398	16.3299	16.4782
HERC6	F1N7C1	28	14.3903	14.5011	14.1418	14.8498	17.7975	17.8277	17.9031	17.8876
ATP2B4	D3K0R6;F1MQ01	12	15.09	15.3145	15.9312	15.357	15.2098	15.4296	15.8206	15.2475
MED27	Q2TBN7	5	14.3956	14.3614	14.5596	14.4324	14.3955	14.5791	14.0002	14.305
ARHGEF1	E1BG38	22	16.4666	16.3041	15.961	16.292	16.2647	16.1355	16.0391	16.1125
COMT	F1MMK0;A7MBI7	14	14.8986	15.4263	15.4555	15.6191	15.1524	15.1189	14.8158	14.8159
QARS1	Q3MHH4	23	17.962	18.065	18.3229	17.9316	18.0046	18.0223	18.2179	18.1954
ERMP1	F1MI95	18	15.6057	15.5299	16.2594	15.7915	15.6539	15.8585	16.1269	15.6201
EFTUD2	A4FUD3;F1N6D5	37	17.453	17.2912	17.4905	17.2373	17.3288	17.4128	17.3797	17.4675
NOL7	Q3SZ46	3	15.4418	15.3172	15.4085	15.0442	15.2058	15.4573	15.2674	15.5955
ACSM1	Q9BEA2;F1MPP7	13	NA	13.9437	15.086	13.2476	13.3344	13.5313	15.5168	14.7654
MBD2	G5E683	8	16.3114	15.8668	16.9523	16.0588	16.0133	16.2047	16.1568	16.2285
MRPL39	Q05B74	10	15.9915	16.4591	17.2825	16.0124	15.7947	16.36	16.4923	16.3417
GSTP1	P28801;A0A3Q1LMV5;A0A452DHY4	12	21.4885	21.6218	21.188	21.7003	21.4988	21.4302	21.3013	21.5168
TRAP1	Q2TBI4	25	22.2648	22.4195	22.9541	22.4998	22.5956	22.5201	22.6969	22.5837
PTGES2	Q66LN0;A0A3Q1LFK5	15	15.8429	15.931	16.7068	15.7688	15.7938	16.0447	16.3865	16.3359
WWP2	A0A3Q1NIL1	3	15.5054	15.374	15.5677	15.5614	15.538	15.1338	15.3066	15.2999
OGT	A0A3S5ZPK0	21	15.4551	15.3287	15.2796	15.3399	15.2327	15.0756	15.2497	15.2359
THUMPD1	Q24K03;A0AAF6ZNP5	9	16.9545	16.8681	16.7227	16.9678	17.032	16.8892	16.9782	16.9942
GALK1	A6H768;A0AAA9TPL4	15	17.474	17.4678	17.3493	17.6455	17.725	17.6036	17.4684	17.5078
MPG	F1MKN2	12	16.2107	16.2241	16.339	16.1924	16.3335	16.3274	16.173	16.1563
TRAPPC12	A6QLC8	11	15.4687	15.4768	15.3752	15.3876	15.4868	15.5298	15.6118	15.5911
RPL34	F1ML72;A0AAA9SX40	4	17.2466	17.5385	18.1291	16.5874	17.0217	17.2935	17.5633	17.5743
VCPIP1	A0AAA9T9Z2	23	15.1516	15.0813	15.2586	15.1327	15.454	15.3611	15.6069	15.5532
PLD3	Q2KJJ8	6	14.6124	15.2162	14.302	14.5592	14.4504	14.3504	14.5414	14.4414
LONP1	Q59HJ6;A0AAA9S896	26	16.6805	16.6283	17.3199	17.0296	17.3735	17.5585	17.4676	17.1934
DYRK1A	A0A3Q1LNU2	8	14.8019	14.4594	14.9492	14.89	14.8218	14.5926	14.7359	14.7071
SMARCA4	A0AAA9TIX2;A7Z019	14	16.2086	15.9589	16.1765	16.0404	16.0555	16.132	15.99	16.0109
SDK1	F1MFI5	8	15.1848	15.1176	15.3035	14.6684	15.2688	15.049	15.2185	14.9143
MIA2	A0A3Q1MUH0	13	15.2152	15.4677	15.9619	15.4962	15.5371	15.5812	15.7079	15.6373
INTS5	A1L552	10	15.1054	14.7099	14.8728	14.7419	14.9406	14.8841	15.0265	14.8816
RAB10	A6QLS9	5	16.864	16.9908	17.3508	17.2645	17.3558	17.4071	17.5056	17.3801
CEBPZ	F1MHM7	11	14.675	14.7779	15.0322	14.491	14.1959	14.8373	14.7366	14.6746
IQGAP2	A0AAA9TLU6	62	17.7452	17.2604	17.3897	17.9367	17.5532	17.5121	17.8062	17.8471
OLFML1	F1N583	19	18.1537	17.2958	17.1911	17.6864	17.8388	17.5691	17.2784	17.5562
CDCP1	G3N093	10	15.1455	14.759	15.286	15.4213	15.5982	15.7877	15.7539	15.4116
SERPING1	A0AAA9TZ37;P50448	13	18.221	18.778	17.9967	18.4525	19.1844	19.0728	18.5467	18.6443
MBD3	A0AAA9T4U1	7	14.9722	14.9264	14.6931	15.0423	15.1978	15.0103	14.9447	14.7281
DHRS12	A6QP05;A0A3Q1M3R6	8	14.637	14.2562	15.0761	14.2873	14.3836	14.5116	14.4712	14.2926
RBM19	A0AAA9TXU2	9	14.0505	14.2328	14.4583	13.9565	13.9249	14.1221	13.9958	14.1686
HSPH1	Q0IIM3	33	17.1415	17.4071	17.2176	17.4343	17.416	17.3929	17.347	17.2845
VAMP7	A0AAA9SMQ2;Q17QI5	7	14.0142	14.2663	14.4156	14.9603	14.7708	14.7396	14.822	14.4105
TTC21B	A7MB60	9	14.7158	14.8252	14.6363	14.8254	14.6964	14.6004	14.6383	14.3019
RORB	F1MWS0	4	14.0762	13.0795	13.3453	13.7571	NA	NA	NA	NA
DNAJC2	A0AAA9S105;Q1RMH9	10	14.7893	14.5884	14.6673	14.5992	14.582	14.607	14.7339	15.0143
NDUFAF6	A7YVD7	9	14.3534	14.2998	15.2178	14.664	14.4995	14.8015	14.7266	14.3354
MCM3AP	E1BJE7	18	14.8548	14.588	14.5873	14.7163	14.6208	14.9097	14.5806	14.618
SLC25A15	Q2KHW4	12	15.2711	16.1447	17.4026	16.7925	16.3242	16.2876	16.8739	16.0458
GUCY1B1	P16068;A0AAF6YLE3	20	15.8383	15.8037	15.0019	15.5965	15.5158	15.4209	15.3431	15.528
METTL26	A0AAF6YK97;Q32KX8	7	16.2872	16.3172	16.2894	16.1238	16.4986	16.4698	16.1808	16.3547
CUL3	A0AAA9T669	33	17.4195	17.3644	17.4443	17.3847	17.382	17.3218	17.419	17.591
LANCL2	A0AAF6DMH4	18	17.3478	17.4212	17.1452	17.3703	17.4922	17.3339	17.2912	17.4228
LANCL1	F1MVX2;A0AAF6Z0W3	17	18.6637	18.5623	18.7487	18.9118	19.0791	18.9459	18.7004	18.875
MTRR	F1MGP5;Q4JIJ2	8	14.4538	14.3147	14.3156	14.8063	14.7869	14.8413	14.4647	14.5085
BAIAP2	Q5EAD0	18	16.4076	16.5477	17.1757	16.1656	16.2464	16.2461	16.7314	16.6997
ERAP2	A0AAF6YHD2;A6QPT7	30	16.7208	15.7655	16.6379	16.66	16.9777	16.9542	16.9561	16.8042
SLC9A1	Q28036	4	14.0807	14.1054	13.981	14.0701	14.2544	14.1601	14.0969	13.7615
ZNF451	E1BGM1	3	14.676	14.354	14.3261	14.0271	14.0843	14.3239	14.4553	14.3903
MICAL3	G3MWR8;A0A452DJI0	15	16.1577	15.7722	15.5515	16.0001	15.8567	15.5984	15.6025	15.6396
SSH3	F1MI92	12	16.333	16.2517	16.2655	16.3832	16.2727	16.2516	16.1852	16.3882
PRDX3	P35705	9	18.2734	18.3401	19.124	18.6053	18.6793	18.863	18.8071	18.6734
UBR7	A3KMX6	7	14.3438	14.5943	14.3141	14.3553	14.2963	13.931	13.9436	14.2284
MMP2	Q9GLE5;F1MKH8	14	17.2617	17.4911	17.1761	17.0786	16.909	16.7792	16.5965	16.5444
XRCC5	A7MBA7	19	16.2314	16.0528	15.9689	16.0189	16.0892	16.0134	16.0376	16.1349
HSPA4	E1BBY7	34	19.3308	19.2164	19.1701	19.4449	19.3815	19.2406	19.3917	19.4541
UBXN1	Q32KW2	5	16.2364	16.2996	16.3044	16.2662	16.0683	16.0795	16.1381	16.3799
THBS4	Q3SWW8;A0A452DJ62	5	14.1833	15.0424	14.5235	14.0742	14.6996	14.4394	14.4355	14.3387
ZKSCAN1	E1BIL7	11	15.5206	15.4939	15.4291	15.485	15.3672	15.3407	15.4669	15.4886
PTPN9	F1N6W1	9	16.2393	16.0988	16.4098	15.875	16.0103	16.1608	16.1931	15.9818
PFAS	A0A3Q1M913	28	18.4957	18.7062	18.359	18.5492	18.4574	18.2442	18.0305	18.091
SEC61A2	Q2KHX4	2	13.4739	14.4306	14.7506	14.2142	14.4136	14.5089	14.5679	14.4642
SEC61A1	Q5EA68	5	16.849	17.5915	17.7339	17.2175	17.2386	17.3196	17.4559	17.2088
EOGT	A0JND3	7	16.2724	16.0008	15.1864	15.3529	16.0309	15.9714	15.518	15.7018
ZNF24	E1B7S7	5	13.8238	14.0479	14.1222	14.2507	14.319	14.3458	13.735	14.0228
ZNF768	A0AAA9SLZ9;G3N1X6	2	13.7017	13.7202	NA	14.6185	NA	NA	NA	14.6804
PARP4	A0AAA9T1A4	10	13.7123	13.6008	13.4887	13.2934	13.3198	12.8208	12.9608	12.9349
RANGAP1	F1MFD5	19	18.8794	18.7019	18.8658	18.6779	18.889	18.8461	18.649	18.7625
G3BP2	F6R199	10	16.5883	16.4422	16.3204	16.5394	16.5803	16.4874	16.3228	16.6336
NFIX	A0A3Q1MIF8	5	15.9468	15.3605	15.8275	16.0786	15.6584	15.364	15.3306	15.6353
SRSF7	Q3T106;A0AAF6ZBD7	7	19.9283	19.9118	20.0386	19.7107	19.7301	19.8948	19.7884	19.6952
NAA20	E1B843	3	14.5711	14.5404	14.1164	14.7732	14.2558	14.6489	14.9753	14.8513
FOLH1	F1MUP1	3	12.7927	NA	13.4969	14.4667	13.6194	NA	14.4905	NA
CLASP2	A0AAA9SFG5	32	16.2967	16.1824	15.872	16.2298	16.1802	16.0769	15.9087	16.103
TP53I3	A0AAF6DM90	3	14.1218	14.7696	13.9912	14.4161	13.9441	NA	14.2781	14.2787
VIPAS39	A0A3Q1M8C6;A5D796	11	15.5486	15.4708	15.434	15.5293	15.6068	15.3864	15.5381	15.5615
ESD	A0A3Q1MAU7;Q08E20	11	19.8475	20.0757	19.6079	20.0784	20.2873	20.096	20.1534	20.1816
TGFBRAP1	A0AAA9TU88;A7MB11	6	14.9271	14.636	14.9516	14.6565	14.8824	15.0729	14.7409	14.904
ZNF384	F1MGZ7	6	19.548	19.1156	19.5099	19.3294	19.5617	19.7233	19.1662	19.419
RGL2	F6RVL5	9	13.95	13.9391	13.9147	13.9886	14.3287	14.0044	14.0203	13.7647
ACOX1	Q3SZP5;A0AAA9S704	20	17.8039	18.2069	18.5198	18.3486	18.0606	18.1825	18.3807	18.4554
TFRC	A0AAA9U1C1	15	15.989	16.7604	17.6137	15.5703	15.5359	15.6325	16.928	16.6916
RTCA	Q2HJ88	9	18.1611	17.7342	17.6945	17.9459	18.2057	18.2202	18.2029	18.1981
HSD17B12	F6RBM0;Q5E9H7	15	18.1244	17.7654	19.211	18.9317	18.3474	18.3792	18.7953	18.2143
RRP12	A0A3Q1M070	16	15.6847	15.865	16.0911	15.8982	15.5562	15.6143	15.6799	15.7012
BCR	A0A3Q1M4M7	10	14.7762	14.689	14.9773	14.5034	14.8828	14.824	14.7271	14.8817
DDI2	A0AAA9S0B0	13	17.2391	17.0678	17.201	17.0624	17.1058	17.0516	17.1318	17.3084
FAM234A	A0AAF7A8K4;Q2HJE5	10	14.2354	14.7615	15.1935	14.7226	14.5454	14.6631	15.2078	14.9129
ROCK2	A0A3Q1MW77;Q28021	29	17.3065	17.1968	16.9956	17.2553	17.1569	16.8754	16.9852	16.9889
MRPL28	A0A452DJJ7;Q2HJJ1	3	13.8654	14.3112	14.8304	14.0243	13.8177	13.7808	13.6727	13.7913
UPF2	F1MQ83	20	16.2353	16.328	16.3483	16.5318	16.3561	16.1835	16.3903	16.3732
ARAP1	F1MHU2	25	16.4355	16.3214	16.6403	16.1148	16.2163	16.1527	16.3626	16.4462
NADSYN1	Q3ZBF0;A0AAF7AU01	15	17.6198	17.3949	17.4345	17.5492	17.5622	17.3021	17.1824	17.3791
ABCC3	F1N3Y6	21	15.5889	14.5656	16.3108	15.8711	15.9007	15.8022	16.1395	15.4413
VWF	A0A3Q1LLU1;P80012	45	17.554	17.0019	16.7662	17.0355	16.5223	16.2849	16.1378	16.2525
KIF1A	A0A3Q1M6P0	15	17.249	17.2501	17.1328	17.7544	17.7159	17.6031	17.3062	17.369
PSME2	Q5E9G3	12	18.2448	18.4214	18.408	18.5873	18.8756	18.7576	18.6448	18.7333
CRTAP	E1BJ75	7	14.8341	14.8606	14.723	14.3111	14.0072	13.4321	13.7499	13.4518
OAT	F1MYG0;Q3ZCF5	12	15.9613	16.9579	16.789	16.6817	15.9001	16.0761	16.0236	15.7995
CMPK2	F1N2W6	24	14.9598	14.8127	14.7196	15.0567	18.3163	18.3923	18.3123	18.4494
IGFBP7	F1MPP2	8	15.0839	15.7751	15.2187	15.1464	15.0369	15.1392	14.5484	14.5626
ALDOA	A0A3Q1NGQ6	4	20.0328	20.3291	20.4418	20.1996	20.196	20.0984	20.2732	20.4131
PCNP	A0A452DIL1;Q32PF3	6	16.9992	16.9986	17.1397	16.9947	17.1215	17.1358	16.8893	17.0281
DDX41	F6QYF9	15	15.2969	15.2952	15.6566	15.1916	15.2839	15.4498	15.3722	15.3539
DGUOK	Q2KIN2	5	15.5111	15.2554	15.9246	15.8393	15.9538	16.0548	16.0867	15.8637
NFKB1	F1MKW9	16	16.1038	15.9295	15.9696	16.1667	16.1716	15.9407	15.8783	16.0298
TRADD	Q2KI74	7	16.5506	16.78	16.5076	16.5438	16.8244	16.7875	16.5692	16.7307
UBR1	E1BIW0	24	21.1725	21.3499	20.717	21.1117	20.9188	20.8206	20.9004	20.881
DDAH2	Q3SX44	10	20.1483	20.0756	20.0033	20.017	20.2974	20.1703	20.1613	20.1608
MDH2	Q32LG3;A0AAF6YTP4	14	21.4293	21.4944	22.1817	21.6135	21.8884	22.0446	22.0544	21.8655
RPLP0	Q95140;F1MDN4	7	19.3554	19.6306	19.7288	19.3823	19.3195	19.454	19.399	19.4681
WLS	A0AAA9SG68	4	12.5576	14.2417	12.8392	12.8321	13.1145	12.9465	13.3707	13.0188
CEBPD	O02756	3	14.8113	14.213	14.8391	14.4957	14.8909	15.0023	14.6953	14.7222
COMMD5	Q5E9K1	4	15.8965	15.9117	16.017	15.8338	15.9226	15.667	15.6344	15.8936
XXYLT1	Q1RMU6	5	14.7637	14.3877	15.523	15.0248	14.9884	15.0265	15.4972	14.7508
NFKB2	A0AAA9T421	15	15.1785	15.244	15.6139	15.6028	15.2537	15.1727	15.285	15.3388
VPS52	E1BDC9	11	15.23	15.1257	15.2164	15.15	15.1071	15.037	14.9031	15.1409
DHODH	A0AAA9TN03;Q5E9W3	16	15.0333	15.1044	16.1157	15.3307	15.8337	16.059	16.0981	15.4658
SLAIN2	Q3MHV6	10	16.1447	15.9534	15.9754	16.0651	15.9869	16.0859	15.9172	16.0783
GLB1	Q58D55;A0A3Q1NDQ7	13	19.098	18.936	19.32	19.0345	18.9769	19.0365	19.0659	19.208
OBSL1	E1BNH9	3	14.4168	13.6941	13.3364	13.4929	13.2632	12.8667	12.8512	12.716
SNX15	Q148E7;A0AAA9SYI5	5	15.542	15.6863	15.4874	15.528	15.5451	15.544	15.4218	15.6878
TXNL1	A0AAA9SQ31	15	17.9854	18.1728	18.1199	18.0487	17.8807	17.8696	18.0263	18.0482
YARS1	Q29465;F1MHM5	29	17.2042	17.2271	17.1368	17.6267	17.9628	17.852	17.6236	17.6277
SLC5A1	F1MD24	4	14.5776	13.6926	14.9583	15.3995	15.7391	15.8698	15.4513	14.5532
DMXL1	A0A3Q1NC20	13	14.6891	14.6933	14.533	14.6408	14.6157	14.5987	14.5159	14.8472
NEU1	A6BMK7	10	16.0673	16.5935	17.0765	15.4028	15.9062	16.0958	15.7778	15.8078
KDM1B	A0A3Q1LGR3	2	12.7279	12.5046	12.8629	12.75	11.8128	12.6897	12.621	12.5995
CDC42EP4	A0A3Q1MPX4	9	17.2394	16.9789	17.3098	16.8402	16.7331	16.8042	16.9371	17.205
ZNF512	A4FV61;A0AAF6ZBL8	16	16.0852	15.6615	15.712	15.7687	15.8067	15.6444	15.7467	15.5883
OPLAH	A0A3Q1LQE0;Q75WB5	21	17.0133	16.9535	16.7994	16.886	17.0098	16.7798	16.2495	16.3388
SCRIB	A0A3Q1LUY1	23	16.0116	15.9252	16.1387	16.1848	16.1246	16.123	16.129	16.0463
EMILIN2	A0A3Q1LL18	22	17.0227	19.596	16.9041	17.0158	16.2355	16.2999	16.6863	16.8179
MAMDC2	A0AAA9S1R1	17	15.719	15.7309	15.0643	15.7522	15.723	14.9722	15.9379	15.2555
TTC7B	A0A3Q1MGB6	8	14.7658	14.2552	14.4423	14.5569	14.6017	14.562	14.6532	14.4556
ETFB	Q2TBV3	9	18.3673	18.1536	18.7429	18.3556	18.5883	18.7803	18.7	18.5241
HDGF	Q9XSK7	15	20.1141	20.0548	19.3106	19.8833	20.0711	20.0152	19.9419	20.0378
GTF2B	Q2KIN8;F2Z4J6	12	16.1269	16.364	15.8321	16.1937	17.5865	17.4936	17.5251	17.4661
C3H1orf50	A0AAA9S6E2	7	16.6123	16.4529	16.657	16.3169	16.6896	16.5347	16.5664	16.4689
TM9SF1	F1MCZ2;A4IFE9	4	14.6927	15.1304	15.8286	15.1334	15.4108	15.4306	15.3449	14.8638
CTH	Q58DW2;E1BNH2;A0A3Q1M2L1	5	13.4346	15.0291	NA	13.9022	13.2337	13.2951	13.9383	14.0471
CARM1	A0A3Q1MWG1	9	16.0658	16.0168	15.4941	16.053	16.0401	15.8034	15.7644	15.7096
YBX3	A0A3Q1LIJ0	5	15.8442	15.5085	15.5405	15.7602	15.7041	15.8687	15.4839	15.3095
PXN	A0AAA9SQ71	13	15.8206	15.7221	15.668	15.4617	15.5292	15.3108	15.3657	15.4817
HARS1	A0AAA9U239;Q2KI84	9	17.5342	17.5273	17.3418	17.6422	17.7817	17.6706	17.6649	17.7231
RAB11FIP1	A0A3Q1N1R3	7	14.9981	15.249	15.5256	14.8495	15.409	15.3578	15.4569	15.7714
GPT2	A0AAA9TCH2	22	19.7302	18.9122	20.1957	19.1733	20.1346	20.232	19.9508	19.6483
NME7	Q5E9Y9;A0AAA9U2I0	8	14.7798	14.926	15.0661	14.6619	14.5236	14.7867	14.6394	14.6488
STAM	A0AAA9SD62	8	16.8702	16.7342	16.7168	16.9465	16.8043	16.6824	16.6197	16.831
MRPL58	Q3T116	3	14.7204	14.8957	15.6441	14.7829	14.4316	14.4386	14.9729	14.7729
RPS18	A0A3Q1MQW8;Q3T0R1	6	19.304	19.7559	19.9303	19.3626	19.2431	19.3602	19.5712	19.5358
NCAM1	A0A3Q1MGY6;P31836	9	15.1643	15.8995	15.7163	15.973	16.3947	16.1671	16.0062	15.6843
SORBS1	A0AAA9TFD0	23	16.5748	16.2207	16.0794	16.7411	16.1785	16.156	16.2494	16.3955
ECPAS	A0A3Q1LRQ5	40	15.9715	16.0541	15.782	15.9144	15.9987	15.8375	16.3286	16.3681
CASZ1	F1N4I0	19	14.7207	14.3315	14.6126	14.9069	14.7598	14.9529	14.5751	14.8213
GOLGA2	A0A3Q1LTM9	23	15.8698	15.9527	16.2499	15.8493	15.9495	15.9374	15.9196	15.9402
ACBD5	A0A3Q1MY50;P07106	11	15.5999	15.5851	16.322	15.7783	16.1177	16.3116	16.3453	15.9818
MANBA	A0A3S5ZPJ9;Q29444	19	16.1823	16.2071	15.8088	17.2341	16.1049	16.0418	16.1851	17.057
UCKL1	E1BP85	8	15.6799	15.627	16.1048	15.8749	15.8607	15.901	15.7015	15.5319
KIDINS220	A0A3Q1MAP2	5	12.79	12.3428	13.7688	13.7478	13.6007	13.3305	13.5636	13.3724
MSH6	E1B9Q4	37	17.6232	17.4612	17.3978	17.5585	17.6231	17.584	17.4738	17.7051
ZNF638	A0AAA9TB71	38	16.5788	16.3396	16.3987	16.3829	16.2612	16.3292	16.3163	16.4151
DNAJC11	Q2NL21;A0AAA9RZQ8	14	15.2756	15.4892	16.5997	15.6374	15.7496	16.0363	16.2056	15.4799
USP7	A0AAA9S7W6	39	16.6763	16.6786	16.8575	16.6656	16.5692	16.5194	16.7352	16.837
XIAP	G3MWG5	15	16.1166	16.0705	16.1791	15.9531	16.4146	16.3465	16.2625	16.4433
BUD23	Q58DP0;A0A452DIR9	4	14.7918	14.9684	15.0713	14.6995	14.9066	15.1282	14.5396	14.689
METTL9	Q0VCJ8;A0AAA9STE5	5	17.9242	17.8788	18.3197	17.8021	17.8962	17.9379	17.6613	17.7451
NAT10	F1MPG7	20	15.4066	15.4505	16.0458	14.9705	15.3472	15.3944	15.4807	15.5923
PTPN6	A0A3Q1M739;F1N376	20	18.2329	18.5461	18.1635	18.0443	18.4581	18.5334	18.6239	18.6202
BIRC2	A0A3Q1N402	6	17.4684	17.5001	17.685	17.7001	17.638	17.6382	17.7371	17.7582
DENND2B	A5D7B4	4	13.9542	13.769	13.7677	12.7909	13.8143	13.5785	13.7918	13.0193
SYNGR1	A0AAA9TPD3	2	15.7933	15.6901	16.6434	16.1599	15.8198	16.1987	16.3346	16.1952
PAXBP1	F1MBJ4	13	15.5572	15.457	15.7983	15.4736	15.5581	15.6068	15.4004	15.5381
KLF4	A0A3S5ZPR3	2	13.2594	13.5581	NA	NA	13.2676	13.1355	13.1364	NA
LRRFIP1	A0A3Q1MQF7	20	16.5283	16.5113	16.8004	16.5141	16.721	16.6369	16.8701	16.9287
EIF2S3	Q2KHU8;A0A3Q1M1J7	14	17.8346	17.837	17.6157	17.7382	17.8653	17.7733	17.8753	17.8913
POLR1G	F6QVL1	4	14.9894	14.5657	14.9995	14.54	14.6205	14.5098	14.6913	14.6771
COL3A1	Q08E14;P04258	14	15.9468	16.4837	16.4809	16.7166	16.3219	15.011	17.6784	15.7818
PARP9	F6R6Y8	16	15.1809	15.1119	15.1513	15.2198	16.3114	16.3882	16.2541	16.0956
XPO5	A0A3Q1ME79	27	15.8857	15.8744	15.8823	15.8749	15.8386	15.7261	15.8547	15.8605
PRPF38B	G3N166	9	15.3787	15.0509	15.2616	15.1374	15.3874	15.3619	15.2489	15.4121
PPTC7	E1BEW5	9	16.1218	15.5072	16.946	15.9781	16.4726	16.5332	16.2829	16.2114
SPCS2	E1BEI2	5	16.2907	16.5301	16.8725	16.8692	16.4287	16.7458	16.9284	16.5308
AFG2A	A0AAA9RXI8	7	14.8356	14.4885	14.4943	13.939	14.6855	14.3763	14.4064	14.1378
CLIC6	E1BAI4;G3N3V2	6	13.9694	13.3119	13.475	14.5117	14.4862	14.0154	13.8835	13.8578
INPPL1	E1BBJ7	28	16.8226	16.5098	16.8415	16.8844	16.9829	16.6902	16.8142	16.7947
TRAPPC4	Q2TBL9	8	15.4758	15.4775	15.7089	15.4854	15.654	15.629	15.883	15.8477
GCLC	A0A3Q1MN33	28	18.451	18.0793	18.5102	18.7453	19.0148	18.9521	18.8676	18.7525
SMTN	A0A3Q1MVI3	14	16.1775	16.1644	16.1774	17.8764	15.8128	15.3733	15.8281	15.8778
PSMB1	G5E589;Q2TBX6	9	17.8068	17.7931	17.6769	17.8366	17.9767	17.7603	17.9019	17.9056
SMARCC2	F1N4N6	24	17.7915	17.3144	17.5435	17.3957	17.5569	17.5933	17.4255	17.4322
LMF2	A1L504;A0AAA9RV78	4	14.1231	14.7984	15.217	NA	14.8448	14.7667	14.935	14.3434
ARMC6	A0A3Q1NCV1	4	14.8191	14.7012	14.8432	14.6492	14.6297	14.6866	14.7508	14.4777
SMARCC1	G3N0H4	6	15.9708	16.4573	16.3572	16.0911	16.0764	16.4253	16.0252	16.4253
RPA1	Q0VCV0	25	17.2675	17.0838	16.6993	17.1684	17.2882	17.0993	16.9971	16.9555
SCIN	Q28046;F1MCZ3	20	18.0025	18.1333	18.5644	17.9072	17.8232	17.9185	18.2181	18.2949
SCCPDH	Q3T067;F1MX05	7	15.6964	15.4291	16.7785	16.1523	16.1875	16.4938	16.4758	16.0625
ASMTL	G3MY50	9	15.2472	15.1033	15.6428	15.0162	15.2075	15.1936	15.2597	15.4272
HCFC1	E1BGF3	34	19.9414	19.4646	19.5532	19.5928	19.6115	19.5314	19.5615	19.6467
CXHXorf38	G3X6Y2	5	14.589	15.0813	14.3443	14.9798	15.4172	15.299	15.3898	15.2987
CYBC1	Q3SZM3	2	12.5857	12.5651	13.436	NA	12.5767	13.3432	13.4668	13.3378
GAA	A0AAF6Z2G3;Q9MYM4	19	17.4973	17.9278	18.34	17.7942	17.8218	17.8788	17.7277	18.0789
CTSB	P07688	14	20.5067	20.9299	20.6274	20.6261	20.506	20.7038	20.787	20.9064
YARS2	A5D7G0	7	15.467	15.4832	16.0387	15.5436	15.613	15.6022	15.6414	15.7307
PAM16	F2Z4I9	3	14.9759	15.1259	16.5389	15.7154	14.697	14.7273	15.7159	15.4718
ENPP5	F1N5W4	10	15.45	15.2001	15.5489	16.2017	15.8344	15.9298	16.4159	16.2193
FBP1	Q3SZB7	15	16.4324	17.7455	18.0636	15.051	16.0838	16.2324	17.3134	17.5937
CLIC5	F1MIH4;P35526	10	17.0641	17.2169	16.7898	17.4268	16.9918	17.0787	17.0236	17.0952
PLVAP	Q3ZC85	3	13.6324	14.8566	13.8009	14.576	13.9688	13.4961	14.2389	14.3047
PDZD8	E1BPC2	13	15.5578	15.4499	16.2433	15.8275	15.7423	15.7854	16.0629	15.6787
SON	F1MYN8	27	16.3795	16.292	16.733	16.3817	16.333	16.5014	16.4426	16.54
MCM4	E1BFZ9	17	17.1422	18.1555	17.3814	17.295	17.049	16.7245	17.2285	17.4019
APPL2	A0A3Q1MJZ3	30	18.0262	17.5003	18.0254	18.1621	18.3983	18.2357	18.0376	17.918
NCDN	Q2KJ97	17	15.0507	14.9894	15.3281	15.9397	16.0409	16.0646	15.6556	15.5652
MACF1	A0AAA9T0L5	121	22.2647	22.2624	22.2058	22.0018	21.9911	21.9916	22.1365	22.2059
RIOK3	Q1RMT7	2	14.0085	14.2733	14.3347	14.1384	14.3075	14.0181	14.2677	14.3387
AHCY	Q3MHL4	23	22.3112	22.2773	21.7883	22.2164	22.3444	22.2668	22.2771	22.4511
CUL1	A0A3Q1M2H6	21	15.5026	15.7082	15.4579	15.5001	15.5198	15.5049	15.4933	15.6235
WAS	A0AAA9SG65	2	13.5981	13.6962	13.7881	13.7908	14.1943	14.1009	14.1777	14.5413
RRBP1	F1MDC1	29	17.868	18.1211	17.939	17.6424	17.6885	17.6606	17.9157	17.8562
SMIM20	F1MDB2	2	15.6178	15.2536	16.8702	15.6679	15.5821	15.8265	16.2933	15.4034
SFXN3	A0AAA9TWW9;A6QP55	2	12.9398	13.0122	13.2009	14.4316	NA	NA	14.9587	13.6172
MCM2	A0AAA9SSL6	18	17.0556	18.1164	17.0289	17.0623	16.9086	16.3663	17.154	17.2565
RPL10A	Q5E9E6;G3X7N2;A0AAF6Z704	8	18.3428	18.5744	18.5861	18.3825	18.339	18.4804	18.4517	18.5719
TRIM56	A0AAA9SZH9;E1BD59	17	15.1598	14.9678	15.1277	15.0028	15.344	15.3253	15.5492	15.4318
DPP8	F1N1L4	10	14.9759	14.7426	14.7286	14.9037	15.1346	14.9545	14.8667	14.8873
DPP9	A0AAA9TGY1	10	15.0003	15.2039	14.8132	14.9531	15.1547	14.8522	15.0405	15.0888
MAN2A2	A0A3Q1LI72	11	13.8372	14.2803	15.0497	14.3197	14.5078	14.6514	14.5827	14.2524
NAALADL2	A0AAA9TUG4	10	15.2579	15.1073	15.7265	15.511	15.7355	15.8794	15.3745	15.385
CALB1	P04467	9	16.5378	14.8498	16.2034	17.8838	17.3243	17.2056	16.9934	16.6289
IBA57	E1BC94	7	15.2734	15.2852	15.852	15.6356	15.7089	15.8876	15.9902	15.6984
RANBP10	F1MSI0;A3KMV8	9	14.0781	14.2836	14.4601	14.3557	14.4651	14.4385	14.4002	14.444
ACADVL	P48818;A0AAA9SJ11	26	19.0535	18.6451	19.7393	19.261	19.1096	19.2292	19.4423	19.2014
CCAR1	Q17R04	23	17.7255	17.3821	17.6221	17.4678	17.5209	17.5576	17.519	17.4811
PGLYRP2	E1BH94	12	16.3131	16.8103	16.3244	16.3999	17.1804	17.1746	16.4567	16.3756
DGCR8	A6QR44	2	13.5173	13.5769	13.9062	13.5712	NA	NA	NA	13.677
VPS33B	Q2HJ18;A0AAF6YGW2	17	15.5884	15.6087	15.7332	15.7219	15.6474	15.4407	15.7848	15.7118
TCIRG1	Q1RMS1	5	11.5891	14.1162	13.1302	12.7048	12.326	12.0399	13.3809	12.9496
SGK3	F1MSV4	2	13.4865	13.9574	13.9332	13.9828	13.956	13.3217	NA	13.7693
SH3PXD2B	A0A3Q1LVH9	14	15.5522	15.2851	15.4197	15.6894	15.4045	15.3352	15.3035	15.1383
CP	F1N076;A0AAA9T0U0	47	19.5375	20.0705	19.1247	20.0654	20.1546	20.1738	20.0563	20.0633
PDZD11	Q32LE7	5	16.4358	16.638	16.3251	16.2724	16.5225	16.7812	16.7195	16.7288
TOM1	Q5BIP4	22	16.9379	17.1509	17.5826	17.2419	17.1161	17.1995	17.3903	17.677
PEX16	Q2KII7;A0A3Q1NJR3	4	13.5848	13.6576	14.6824	13.8802	13.5195	13.4823	14.1618	13.813
MOCS1	A0AAA9SB64;Q1JQD7	5	14.0579	13.7737	14.4914	14.3687	14.7182	14.6255	14.7014	14.3613
ATL2	A0A3Q1LP31	7	14.2068	14.7609	14.6478	14.6141	14.6561	14.8258	14.9752	14.5796
PRPSAP1	A0AAF6ZDQ7;Q08DW2	12	16.3769	16.2084	16.0839	16.0809	16.4869	16.4525	16.4801	16.5373
PRPSAP2	A2VDS0	6	14.7518	15.4814	15.2319	15.357	14.9996	15.0103	15.2129	15.3635
ATP5PD	P13620	11	18.1875	18.6902	19.6311	18.8196	18.8446	18.9656	19.5363	18.6958
SNTB2	F6QN89	16	16.9071	16.6102	16.4807	16.9496	16.4391	16.2272	16.5733	16.6667
DPT	P19427	6	19.021	18.2233	19.3908	19.0259	18.4144	18.2118	18.7162	18.8938
GSTK1	A0AAA9TW47	8	17.3549	17.0846	17.919	17.3479	17.4176	17.7603	17.7332	17.5453
ACMSD	Q0II68	12	14.4982	14.3534	14.3221	14.9959	14.758	14.6577	15.5284	15.54
PDPK1	A0AAA9TJF9	13	15.1534	15.5201	14.9253	15.624	15.0108	14.8267	15.2117	15.4231
RPL7	A0A3Q1LP69;Q58DT1;A0AAA9SNT9;A0AAF6Z7G1;A0A3Q1LKR0;F1N7A3	12	18.8252	19.5341	19.5912	19	18.9464	19.0507	19.1684	19.1715
SLK	A0AAA9TNL3	23	15.9913	15.9722	16.176	15.7386	15.8319	15.7114	16.0873	16.2209
RPL22	A0AAA9SFF8	3	19.341	19.6604	19.6561	19.4202	19.6718	19.9329	19.7436	19.6724
PLEKHA2	Q3ZBA3	6	14.6779	14.818	14.6087	14.842	14.7267	14.6327	14.1797	14.2979
NF1	A0AAA9TGB2	16	15.8467	15.5299	15.3847	15.6648	15.4497	15.1568	15.3713	15.2632
EFEMP2	A0A3Q1MN12	10	16.6624	16.3942	16.5528	16.1565	16.2608	16.1687	16.2429	15.9254
MED14	G3X6Y3	12	15.3851	15.2432	15.4645	15.0457	15.2288	15.4904	15.2559	15.4501
VPS4B	Q0VD48	12	18.0242	18.1195	18.1767	18.2312	18.224	18.1069	18.1985	18.1501
BICRA	F1N0G2	2	12.5916	NA	12.379	12.6784	12.1797	NA	11.7741	11.947
CABIN1	G3X746	5	14.1648	13.7583	14.0852	14.1658	13.9506	14.1021	14.2607	14.0585
OGFRL1	F1N3J9	4	13.6273	14.033	13.7703	14.5226	14.321	14.046	13.6689	13.2954
LTBP4	A0AAA9T4E5	11	14.2408	13.9951	14.0325	14.1665	14.2245	14.0625	14.0293	14.2337
ATP5MK	A0A3Q1ML84;Q3ZBI7	4	16.6933	17.1851	18.5203	17.3639	17.2443	17.4558	17.9734	17.3268
ZC3H18	G3MX37	8	14.7918	14.4215	14.6908	14.6752	14.4292	14.3352	14.5847	14.5438
TEX10	A0A3Q1M1K0	18	16.2425	15.9539	16.1677	16.0491	16.2879	16.4814	16.2796	16.1661
STK26	A0A3Q1MJL8	3	16.1215	16.9409	16.2934	16.3119	16.6956	16.3322	16.2789	16.7884
SMG9	Q2YDD2;F1MBJ5	4	12.9559	12.5444	13.0826	12.8589	13.0566	13.1613	NA	NA
BYSL	Q5E9N0	12	14.9819	15.1121	15.2769	14.8479	15.0012	15.0949	14.9893	15.0252
SRC	E1BIM8	9	16.2487	16.4787	16.6351	16.5116	16.2633	16.1062	16.0389	16.1244
NIPSNAP1	Q0P5K8	9	16.4935	16.3323	16.9008	16.4195	16.5556	16.5878	16.6609	16.7211
HS1BP3	A0A3Q1LSP6	12	16.6595	16.5527	16.5338	16.507	16.5984	16.3965	16.5515	16.3586
ZBTB20	F1MDT4	10	16.8339	16.0624	16.3418	16.053	16.0057	15.4949	15.8468	15.4225
FAM83H	A0A3Q1M4P9	10	14.2938	14.1855	14.263	14.094	14.3568	14.6148	14.1834	14.2386
RPIA	G5E534;Q3T186	7	15.6102	16.424	16.4501	16.1835	16.5103	16.2393	16.3191	16.6911
BHMT	Q5I597;A0A452DHV7	2	NA	14.546	14.6751	NA	14.6965	14.6689	NA	13.9968
MRPL11	A0AAA9RV64;Q2YDI0	7	15.1979	15.2927	15.9266	14.853	15.2188	15.5575	15.282	15.1366
PGD	A0A3S5ZPM3	22	19.9413	20.0476	19.9035	19.9856	20.0729	19.9104	20.1521	20.2433
CNN2	Q3SYU6	8	17.5216	17.775	17.41	17.4406	17.0282	17.1892	17.0703	17.3072
SLC29A1	F6PZI3	4	16.1343	15.6163	16.5708	16.4615	17.477	17.5195	17.1891	16.5357
DCP1A	F1N4I7	10	15.5636	15.513	15.6336	15.9896	15.3499	15.232	15.0361	15.5168
BCAS1	A0A3Q1LQB6	16	16.0452	15.879	16.7241	16.2061	15.4092	15.3811	16.5273	16.434
LZTS2	A5PKL7;F1MY71	6	14.5368	14.2613	14.3859	14.2756	14.5552	14.6441	14.4746	14.3969
HOOK2	A0AAA9SN40	6	13.8051	13.8678	14.1964	13.6184	14.1124	13.9307	13.6337	14.0637
MRC2	A0A3Q1M5H7	25	17.3592	17.6205	17.5138	17.3638	17.1375	16.8059	17.513	17.0005
C1H3orf33	E1B722	3	NA	NA	15.3269	NA	15.4094	NA	15.9686	15.63
TBC1D24	Q29RJ2;A0A3Q1MCN9	11	17.0421	16.8442	16.595	16.9322	17.2401	16.878	16.8598	16.84
ZFYVE26	A0A452DJ92;E1BLZ4	10	14.3214	14.2896	14.6027	14.3771	14.3756	14.3873	14.1667	14.0628
CNN3	Q32L92	11	20.1088	20.0275	20.1018	19.9716	19.9484	20.0055	19.8451	19.8674
AAK1	F1MH24;A0A3Q1LT42	29	16.8969	16.7832	16.7412	17.1668	16.9779	16.8552	16.7763	17.0003
ALG9	A0AAA9TM73	7	14.7874	15.3375	15.7928	15.1983	15.2968	15.1032	15.2594	15.313
IRF3	Q4JF28	12	15.4496	15.7427	15.5675	15.6429	16.5852	16.4728	16.5346	16.6141
MYD88	A0A452DHW6;Q599T9	7	14.7187	14.8405	14.9321	14.9764	14.6916	14.6453	14.6707	14.6661
SELENOO	G3X686	9	13.9945	13.8949	14.3685	14.0125	14.0761	14.0506	14.2872	14.0414
MISP3	F1N705	2	14.9017	14.9604	14.7162	NA	14.5627	NA	NA	14.7213
CEP170B	G3X6H0	6	13.3345	13.9422	13.8071	13.6373	13.2572	13.5529	13.6214	13.8517
MYO6	E1BPK6	49	17.865	18.0609	18.8071	18.1771	18.1434	18.3668	18.3542	18.5195
LAD1	A0A3S5ZP82	10	15.4002	15.0283	15.1585	15.2771	15.4045	15.6496	15.5966	15.7599
NHERF2	G3N1L5	13	15.5732	15.4987	15.3687	14.9488	15.4781	15.4966	15.2295	15.1037
RSF1	A0A3Q1LP30	12	15.9365	15.6111	15.9775	15.7017	15.7478	15.6867	15.7553	15.725
STT3B	A5D7G6	11	15.7411	16.4781	16.9457	16.3257	16.2115	16.0719	16.6896	16.064
SLC5A6	F1MN65	3	12.686	13.2752	13.6806	14.3788	14.7646	14.9596	14.3443	13.6085
HID1	A0AAF6DLN3	16	15.7967	15.8415	16.5119	16.1747	15.9182	16.114	15.795	16.0413
BAG6	A0AAA9S5L9	18	16.4649	16.6467	16.8297	16.6416	16.5774	16.61	16.5595	16.5807
KRI1	Q0V8M0	5	14.343	14.6277	14.9495	14.2193	13.9965	14.4607	14.4021	14.493
OSTF1	Q8MJ50	9	18.2046	18.5023	18.268	18.0167	18.1513	18.135	18.2566	18.5047
ISG15	O02741	11	17.3539	17.2156	17.2197	18.3503	22.4909	22.5202	22.5031	22.6123
FMNL1	F1MGX4	10	16.4352	16.2162	16.2466	16.1287	16.4384	16.0548	16.2372	16.4801
PTPN1	A0AAA9TFV5	16	17.5038	18.4419	18.6514	17.8154	17.5749	17.5767	18.3322	18.0499
PALM3	A0A3Q1LZW1	13	14.9787	15.2956	15.0814	15.5749	15.2838	15.2719	15.21	15.4333
MRPL41	A5PJ71	4	13.4714	12.9914	14.3412	13.5941	13.9017	13.9581	14.153	14.201
BAZ1B	E1B6X6	28	16.3183	16.1169	16.0872	15.8206	15.9506	15.9091	15.9585	15.8843
FRMD8	F6QQB6	5	15.6568	15.712	15.2704	15.3361	15.6986	15.3497	15.32	15.5654
PHGDH	A0A140T866;Q5EAD2	29	20.5728	20.3936	20.2762	21.2188	20.9753	20.9172	21.0599	21.0569
PHF3	A0AAA9T2E9	15	15.6654	15.169	15.3615	15.4146	15.648	15.3694	15.4448	15.6274
CERS2	A0AAA9TYA9;Q3ZBF8	6	14.8308	15.5907	15.8369	15.2764	15.1331	15.4528	15.5557	15.1503
ITGAV	P80746;A0A3Q1MXS2	19	15.2243	15.1917	15.6198	15.7163	15.6064	15.7409	15.8909	15.3353
CORO2A	Q32LP9;A0AAA9TQU6	11	15.8003	16.0619	16.0417	15.9684	15.9186	15.9472	16.4621	16.4389
NUP160	F1MZR0	32	16.812	16.5443	16.9074	16.5614	16.6507	16.8322	16.4153	16.5255
TTC9C	A0AAA9RWC7;E1BJN0;A4IFF3	4	15.0457	14.9307	14.2068	15.0172	15.3867	15.34	15.1428	15.2234
NFRKB	F1MPR9	6	13.7404	13.2177	13.8027	13.5777	13.3496	13.6244	13.5743	13.3308
NAGK	A0A452DJF8;Q3SZM9	7	18.0803	18.0563	17.5456	17.6641	18.5814	18.3332	17.8101	17.8741
GDPGP1	Q5E9T1	11	15.0241	14.8341	15.3882	15.0966	15.4786	15.4132	15.3326	15.1882
RNASEH1	F1N2X2	3	13.5017	13.3128	13.9035	14.4196	13.6533	NA	13.873	13.5126
AP5B1	G3MZC5	8	13.9115	13.5065	13.7204	13.6316	13.8984	13.9375	13.7145	13.5003
PDZK1	Q3T0X8;A0A452DI72	14	15.5435	15.6288	15.1839	15.7696	15.2619	15.3417	15.526	15.6916
MPPE1	A0A3Q1MCX7	3	12.0606	13.2931	13.1803	12.6692	NA	NA	11.9581	12.4147
ATP6V0D1	A0AAF6Z0J8;P61420	7	15.8968	16.4243	16.3207	15.9556	15.7607	16.0369	16.2138	16.0865
RTRAF	Q3T0S7	10	17.8815	17.6703	17.3148	17.8093	17.5931	17.5684	17.4628	17.6444
ERICH3	A0AAA9T0X5	10	14.3465	14.1332	14.4703	14.3177	14.607	14.386	14.6366	14.4768
PDCD6	A0AAA9T4F5	5	17.1989	17.0483	17.1429	16.9862	17.0858	17.0274	16.9756	17.1097
ABCD1	Q2KJ57	12	15.4756	14.4598	15.9033	15.9494	15.7241	15.7731	15.9553	15.1597
RPL7A	Q2TBQ5;A0AAA9S7M5	13	19.1671	19.5783	19.2882	19.3107	19.3175	19.4178	19.4931	19.4625
EIF2B4	Q3T058;A0A3Q1LPP5	9	15.3249	15.1815	15.2682	15.2357	15.2857	15.2562	15.237	15.0022
PAF1	Q2KJ14	11	15.4541	15.5414	15.8476	15.3694	15.6012	15.7762	15.6808	15.5643
ESYT2	A0AAA9SS32	20	15.4549	15.6527	15.8482	15.7093	15.9387	16.0182	15.8344	15.6258
THAP11	A5PKF5	3	14.446	14.0734	14.3307	14.1153	13.8718	13.9861	13.9656	13.269
CPOX	E1BKY9	20	16.2343	16.4508	16.6325	16.2116	16.4441	16.768	16.8242	16.849
ELAPOR1	A0AAA9SZ40	20	16.6758	16.5514	17.3614	16.1411	16.7192	16.8757	16.8888	16.6907
STARD10	F1MXU5	8	15.7047	15.9964	14.9286	15.749	15.5712	15.4592	15.6991	15.8328
CMBL	F1N2I5	9	18.627	18.7337	18.7568	18.9734	19.4782	19.5606	19.2168	19.3627
CGN1	P23805;E1BEZ9	6	17.2085	17.2248	17.372	18.1771	17.7471	17.3237	17.4717	17.866
PGS1	A0AAA9T2G4;Q2KJ28	8	14.6764	14.9673	16.0435	15.4766	15.6964	15.7782	15.7292	15.3413
ACTR5	A0AAA9SR01	5	14.9431	14.8457	14.9848	15.0039	14.6572	15.1196	14.7024	14.9017
MFN2	D7GLD0	16	13.9251	14.2419	14.9152	14.2467	14.4271	14.4175	14.9601	14.4677
PFN1	P02584;E1BHJ0	10	21.8516	22.4228	22.2254	22.0835	22.1156	22.1547	21.9194	22.0707
PTGIS	Q29626;A0AAF6Z3X9	12	17.9791	18.7481	18.7702	18.914	18.6544	18.6369	18.7928	18.2461
NDUFA10	P34942;A0AAA9SAR7	11	16.1283	16.0161	16.8948	15.7168	16.1195	16.1864	16.6201	16.2734
SEC23B	Q3SZN2	21	17.3425	17.3976	17.3564	17.2295	17.1735	17.1537	17.1463	17.2701
TRANK1	A0AAA9SEL9	23	14.002	14.0501	13.8466	13.3715	15.9831	15.9312	15.5272	15.4748
KANK2	Q1LZH7	22	16.9929	16.2786	16.2091	16.6191	16.0839	15.7973	16.0992	15.9258
ZFR	F1N0Y9;A0A3Q1MI58	22	15.7998	15.3379	15.4642	15.4249	15.5476	15.4416	15.377	15.4685
KANK1	F1N1B8	2	12.9586	13.3254	12.1406	13.2565	NA	13.2312	12.7866	12.8478
FXR2	A0A3Q1MDB8	11	17.8874	17.5894	17.894	17.7799	17.9445	17.8827	17.8193	17.8089
AIP	A0A3S5ZP93;Q7YRC1	11	17.0146	17.0764	16.8309	16.8629	16.8081	16.6488	16.688	16.7493
ARHGAP1	F6RWK1	16	17.3146	17.473	17.4755	17.59	17.1916	17.2247	17.1208	17.2515
LAMB3	F1MMK1	6	13.2808	12.6662	14.1868	13.2041	12.7045	12.7226	13.5383	13.4937
EIF2B3	A0AAF6DMG9;A5PJI7	13	15.4177	15.613	15.4122	15.8813	15.6274	15.4178	15.4174	15.6067
CSTF1	A0JN63	8	15.6475	15.4523	15.7158	15.5152	15.5063	15.517	15.5761	15.7105
WDR1	Q2KJH4;F1MTP5	23	19.3684	19.4763	19.1666	19.4918	19.3973	19.3494	19.378	19.4644
PREB	A0AAA9RV38	15	16.7934	17.0531	17.8567	17.4222	17.5921	17.6491	17.6933	17.085
FAH	A5PKH3;F1MYZ7	11	15.9865	16.4209	16.0916	16.459	17.1354	17.03	16.3636	16.2276
CCT8	Q3ZCI9;G3X861	30	19.5334	19.6308	19.5603	19.4916	19.5659	19.6048	19.5596	19.6449
SKIC2	A0AAA9SE27	29	17.3444	17.1891	17.1588	17.3146	17.1613	16.8713	17.0764	17.0414
GCLM	Q2T9Y6	10	15.8357	15.9385	15.873	15.5089	15.7	15.5731	15.9551	16.0115
PALS1	E1BIQ8	8	15.8509	16.3414	16.0831	15.5871	15.624	15.4803	15.8117	15.7568
AP1M1	Q2KJ81	8	16.0023	15.8261	15.5864	15.8397	15.8187	15.8197	15.6429	15.7836
AP1M2	A0A3Q1LWL6;Q3SYW1	12	16.8795	17.1641	17.2299	17.0485	16.9739	17.1044	17.1353	17.361
FAM169A	F1N5F9	14	14.684	14.5866	15.186	15.2177	15.7568	15.5288	15.2588	15.1716
CAPN7	E1BIX3	15	15.5462	15.4102	15.1224	15.4708	15.3352	15.1302	14.9572	15.37
FARSB	A0AAA9SPL5	18	17.353	17.4203	17.3854	17.4618	17.4327	17.3931	17.3383	17.4195
ATP5F1B	A0A452DII8;P00829	23	21.4237	21.6431	22.1847	21.676	21.7594	21.9818	22.0688	21.8063
HDHD3	Q5E9D6;A0A452DHL8	12	16.5237	16.1861	16.5696	16.5638	16.8695	17.2348	16.8254	16.7944
HNF1B	F1MK03	8	18.3989	17.7134	18.7536	18.3729	18.6832	18.8263	18.312	18.4239
MITF	A0AAA9SVL5	3	14.6909	13.8548	14.2445	14.7126	14.7939	15.2509	13.9628	13.8455
SYK	A0A3Q1MHG9	3	13.7882	13.7372	14.2292	14.4472	14.5805	14.4298	14.3846	14.6801
ITIH2	A0AAA9RW75	19	18.8876	20.045	18.3118	19.7677	20.4245	20.3587	19.6564	19.6686
CLTC	P49951;A0AAA9SF14	76	20.9715	21.0504	21.3707	20.9751	21.0771	21.1769	21.1343	21.1781
SSC5D	A0A3Q1MT81	5	13.1498	13.5699	13.0405	12.9474	12.7727	12.5205	12.4623	12.4228
MOV10	Q0V8H6;A0AAF6YZT3	29	15.8895	16.0696	16.3834	16.242	16.1393	16.3166	16.3054	16.4083
ADSS2	A7MBG0	13	16.861	16.8438	17.0399	16.8728	16.9835	17.0104	17.5109	17.4837
VPS39	A0AAA9TAD1	22	16.5122	16.2143	16.6802	16.4508	16.5058	16.6088	16.4577	16.6226
CLASRP	A0JNI5;A0A3Q1MSZ6	3	13.8899	13.8354	13.6606	13.8331	13.8198	13.3215	14.2697	13.6938
CEP128	A0AAA9TFT1	4	13.5441	13.8456	13.9302	13.1969	13.5725	13.533	13.5734	13.8658
VTI1A	A0AAA9S2Q2	3	14.2201	14.8454	15.2066	14.074	14.5999	NA	14.7604	14.8802
RPL3	A0AAF6YKW6;P39872	11	19.2593	19.5068	19.0929	19.1192	19.2631	19.4613	19.2756	19.4742
SPICE1	Q2T9X8;F1MIU6	8	14.1405	13.8774	14.5812	13.9557	13.8606	14.1055	13.8862	14.1811
RBM10	A0A3Q1M366	11	15.9655	15.7442	16.0623	15.9643	15.7355	15.9452	15.96	15.9583
CFAP161	F6RJC2	4	13.5191	13.6639	13.755	13.408	13.3611	13.4181	13.7954	13.6393
PABPC4	F6RN21	14	18.0363	18.4831	18.4647	18.2313	18.1355	18.2952	18.3468	18.4782
ANXA11	A0AAA9SWE4;P27214;A0AAA9U0R7	15	18.0445	17.9949	18.1321	17.7558	17.6836	17.7589	17.791	17.7639
ADSS1	A5PJR4;A0AAF6ZFA7	11	14.8057	14.7668	14.9223	14.7257	15.2551	15.0697	15.0857	14.9205
GMPPA	A0A3Q1LUY6	15	16.8683	16.9176	16.1913	16.8524	16.9019	16.6314	16.6418	16.6539
CHMP3	Q58CS7	4	16.4826	16.8423	16.4071	16.3387	16.5095	16.4151	16.2092	16.3718
COL4A2	F1N7Q7;Q7SIB3	6	15.2161	17.0251	14.7807	15.2039	15.0773	14.8203	15.7472	14.9347
LOC616948	Q3MJK3;A0A3Q1LM24	8	15.9641	15.8611	15.6514	14.9461	16.1934	16.0507	16.7953	16.885
LOC522479	A0A3Q1LTS9	8	14.8236	14.3503	15.1414	14.5858	15.4665	15.4442	NA	NA
GPX1	P00435	12	19.0329	18.7162	18.8774	18.5829	18.7376	18.6641	18.4633	18.4068
DAXX	F1MGU0	6	14.3688	14.2222	14.3918	14.4229	14.9282	14.8389	14.9956	14.9815
FAF2	Q2HJD0	12	16.3988	16.81	17.6372	16.952	17.0375	17.0357	17.3885	16.7606
LAMA5	A0A3Q1MA79	29	15.2105	16.6849	15.3814	15.2998	15.1365	14.9259	15.6728	15.3691
PPP6C	Q2KIC7	7	16.3654	16.3116	15.9111	16.2724	16.4575	16.2419	16.3495	16.3637
PPP4C	A6H772	6	17.8321	17.7554	17.3554	17.8247	17.9772	17.7503	17.7288	17.8031
MGST3	Q3T100	4	17.4493	17.4232	18.714	17.7774	18.03	18.148	18.6378	17.9711
SIKE1	Q0VCF3;A0AAA9RW05	7	15.4839	15.3542	15.5178	15.4556	15.478	15.5814	15.3372	15.5005
BSPRY	F1MKU3	13	15.0908	15.3394	15.3688	15.0496	14.9777	15.4222	15.3626	15.3057
PROS1	A0AAF6ZAV2;P07224	14	16.1673	16.9049	16.0608	16.6018	17.1803	17.2969	16.4558	16.613
DENND4C	F1N032	19	15.1167	14.9251	14.925	15.111	15.1895	15.1313	14.9775	14.9983
WDR77	Q5E9I7	8	15.7206	15.6272	15.4931	15.7805	15.7363	15.5242	15.7466	15.8108
SIPA1L3	A0A3Q1MMG4	11	15.3076	15.4006	15.2717	15.0091	15.613	15.4451	15.5381	15.5805
STIM1	A0AAA9SQQ0;Q58CP9	11	14.4779	14.9622	15.3055	15.0157	14.9959	15.069	15.0535	14.7105
STRIP1	Q0P5J8;A0A3Q1MT54	5	15.0028	15.0835	15.1077	15.2877	15.1144	15.1299	15.3342	15.1293
CST6	Q5DPW9	8	16.9461	17.4224	17.3124	18.334	17.5049	17.7958	17.7332	17.5126
COPS2	G3X736	14	16.7937	16.6215	16.4723	16.7937	16.896	16.8504	16.7817	16.6971
HSD17B11	Q2KIS5	6	15.1993	15.0651	15.2792	15.3447	15.4851	15.6449	15.55	15.1267
RNF213	A0A3Q1LV49	92	15.6628	15.3867	15.6008	15.7755	16.9476	16.9252	16.9342	16.7958
GGACT	A0AAF7A0Y9;Q0VFX9	6	15.0305	14.8438	15.3286	15.0885	15.2319	15.2134	14.997	15.5288
SEC23IP	E1BKW5	24	16.6573	16.4737	16.5213	16.5299	16.5805	16.4344	16.4685	16.5755
DIP2A	F1MPW1	15	17.3721	17.3082	16.8849	17.5244	17.4302	17.4442	17.3802	17.3764
ZNHIT2	Q2TBW5	3	14.089	13.7664	14.1938	14.1306	13.8276	14.2108	13.7157	13.969
CAD	F1MVC0	45	16.1934	16.2498	16.0561	16.1437	16.0976	15.9005	15.7508	15.7306
MT-ND4	P03910	2	14.6237	15.1311	16.1426	15.0111	14.9114	14.7269	15.5777	14.962
SMCHD1	F6RF21	41	17.9688	17.8517	17.7795	17.5833	17.772	17.8204	17.7973	17.8096
CAPG	Q865V6	13	19.3595	20.3456	19.6314	19.1502	19.6487	19.5656	19.5364	19.7333
POLR1B	A0AAF6DM82	10	14.5545	14.5916	14.6739	14.5017	14.4388	14.2707	14.4507	14.6272
RAD21	Q3SWX9	18	16.5453	16.2857	16.3214	16.3425	16.4153	16.5329	16.4505	16.489
PRDX2	Q9BGI3;A0AAA9RUA3	11	20.8778	21.0407	20.9083	21.0224	20.7204	20.5455	20.8864	20.8742
VCP	G3X757;Q3ZBT1	44	20.2885	20.1996	20.5602	20.2288	20.1651	20.2599	20.2806	20.3301
CTNNA1	Q3MHM6;A0A3Q1M9M0	29	19.0032	18.7648	19.2936	19.2442	19.0113	19.0345	19.3789	19.2354
KLC4	F1MWR7;Q2HJJ0	15	17.7233	17.5528	17.6692	17.7043	17.7353	17.6093	17.6031	17.6864
DOCK6	E1BK77	20	17.1722	16.8273	17.1357	17.0735	17.1359	17.1309	16.9307	16.9843
NCBP2AS2	A0A3Q1NMJ3	2	NA	14.9737	15.0569	NA	14.7728	14.6697	14.8464	14.563
GSS	Q5EAC2;A0A140T850	12	18.2139	18.0688	18.5391	18.5476	18.4466	18.4877	18.5004	18.5513
MCM5	Q0V8B7;A0AAA9TCV3	17	16.6481	17.4953	16.6298	16.5113	16.4914	16.0166	16.6441	16.9202
BPNT1	Q3ZCK3;A0A3Q1MCU7	15	18.3117	18.1785	17.9681	18.4535	18.9437	18.9888	18.9852	19.08
SUPT6H	A0A3Q1LVF3	30	17.0941	16.8275	16.8958	16.9054	16.9298	16.8895	16.9827	16.9698
GBP1	A0A3Q1MHZ1	8	17.1229	17.5796	17.3465	16.8382	17.7336	17.7142	18.0125	17.9821
CDA	A0AAA9TAP6	5	14.6605	14.2122	14.4805	14.3054	14.5351	14.2937	16.0619	16.6549
LARP4B	A0A3Q1LR80	12	15.0371	14.8474	15.483	15.0652	15.1896	15.3367	15.3323	15.2727
ITPR1	A0AAA9S9T4;Q9TU34	3	12.7185	12.5448	13.1114	13.0205	NA	NA	NA	11.8732
IFI16	A0A3Q1MUY5	14	17.4433	17.1694	17.1182	17.2108	17.8857	17.7745	17.7984	17.6974
NR2F6	F1N3S3	9	14.2944	14.2311	14.3069	14.2766	14.6071	14.5314	14.5893	14.6239
ITGA2	P53710;F1MBA3	19	14.7617	14.9809	16.0895	15.418	15.5353	15.7114	16.2987	15.8078
LRWD1	F1N397	4	14.961	15.1294	15.0887	15.0939	15.2447	14.6475	14.8745	14.7263
AGO1	A0A3Q1MEG1	13	17.1304	16.8642	16.7081	16.908	16.9192	16.8584	16.8175	16.7958
AGO2	Q6QME8;A0AAA9S2J2	22	16.876	16.6247	16.5959	16.7222	16.7943	16.7201	16.6848	16.6992
RABEP1	F1MQH8	31	16.9845	16.4041	16.4875	17.4124	17.0508	16.9292	16.98	17.0002
NID2	F1MF97	35	17.5762	19.1329	17.4289	17.3395	16.9947	16.643	17.6782	17.3425
PFKM	Q0IIG5	10	16.2928	16.4054	16.3246	16.037	16.1021	15.985	16.0561	15.8244
NFIB	Q0VCL6	7	16.9461	16.5038	16.2145	16.6473	16.2865	16.4729	16.3721	16.4114
WDR54	A0AAF6DMI3	6	15.1495	14.7344	14.889	15.2848	15.2711	15.2851	15.1978	15.1927
VPS45	F1MDA6	13	16.4342	16.3709	16.2691	16.264	16.5573	16.5057	16.5544	16.5578
SGTA	Q32LM2	9	17.3365	17.3455	17.2678	17.2537	17.4653	17.2362	17.2299	17.3176
STAG2	G3X6R3	22	17.0074	16.7075	16.6066	16.7581	16.721	16.8768	16.582	16.8475
PSMC1	A4FUZ3	22	18.9286	18.9646	18.9981	18.9119	18.9367	18.8542	18.9364	19.0406
ANKFY1	F1MD79	18	16.2849	15.9509	15.5516	15.8642	16.1838	15.9239	16.2366	16.2736
GALNS	A0AAA9U1E9	7	17.3104	17.1362	17.474	16.6654	17.2265	17.3212	17.3671	17.3967
ST13	A7E3S8;A0A3Q1M4L0;A0AAA9TBE2	9	20.3957	20.4089	20.6532	20.5031	20.5366	20.3536	20.4309	20.5219
STRBP	Q08E27;A0AAF7AND0	15	18.7722	18.6578	18.4537	18.5849	18.4649	18.6723	18.46	18.6537
SNX8	Q2KHV6	7	16.5026	16.7917	16.5553	16.5904	16.4685	16.0622	16.4022	16.3383
CLMN	E1BM27	16	15.9779	15.6044	15.5916	16.0037	16.023	16.1825	15.9195	15.8885
ADAM10	Q10741	15	16.2175	16.1935	16.3225	16.5006	16.8103	16.9826	17.1159	16.5813
EFR3A	A0AAA9T2Q2	4	12.6849	12.3704	13.2748	13.337	12.5677	NA	13.2973	12.5481
IFT46	A0AAF6YYD2;Q1LZB4	2	13.6608	14.2868	14.1795	14.0006	13.666	13.1665	13.6257	13.6265
FLYWCH2	E1BBK3	2	15.1022	14.7394	14.5632	15.0357	15.2086	15.0541	14.9101	14.8813
ATP7A	A0A3Q1ML70	8	16.9756	16.8476	17.0305	16.8462	17.0627	16.7597	17.1331	16.9965
RBM14	F1MI47;Q5EA36	18	18.5526	18.3106	18.626	18.3866	18.2908	18.3763	18.2262	18.4163
SYNCRIP	F1MCT8	18	19.274	19.1642	19.1292	19.1255	19.1822	19.2498	19.2342	19.2771
DHCR7	Q5E9J5	4	16.1133	16.2681	17.052	16.827	16.2618	16.3204	16.57	16.1369
SAFB	A0AAA9TEU1;A0AAF6DM79	17	19.4767	19.2235	19.1833	19.2456	19.3423	19.4102	19.3274	19.4547
SMARCA2	A5PKK5	11	15.9711	15.7174	15.871	15.3505	15.3723	15.1832	15.5618	15.599
C9	Q3MHN2	19	19.8647	20.4254	19.3309	20.4628	20.6601	20.61	20.0327	20.0244
MATN2	A5D7D5	14	15.1096	14.8729	15.2474	14.9251	14.6434	14.2068	14.3989	14.3021
DIS3	F1N1R4	23	16.5798	16.4109	16.3257	16.2522	16.2782	16.2498	16.2712	16.2751
STMN1	Q3T0C7;F1N1C2	5	18.4376	18.5334	18.1313	19.1047	18.3974	18.3547	18.6685	18.7115
LARP7	A0A3Q1LP50	19	16.0114	15.708	15.5376	15.673	15.7184	16.0153	15.6109	15.7562
RMDN2	Q2TBQ7	4	13.7886	13.7648	14.1787	13.9487	13.8872	13.9995	14.2649	13.8769
UAP1	F1MJP7	17	19.3385	19.4199	19.2659	19.4164	19.5095	19.3061	19.6026	19.8394
FGFR1OP2	E1BBF9	4	14.1246	14.405	14.0213	14.548	14.5785	14.9693	14.7424	14.7146
NOSTRIN	Q2KJB5;F1MKH2	10	16.3453	15.7246	16.1572	15.6088	16.2234	15.9605	15.6111	15.7896
SRP72	E1BB38	21	17.0052	16.8215	16.7574	16.9594	17.0518	17.0104	17.096	17.0234
STX4	A0A452DIB2;Q3SWZ3	5	14.9951	15.0412	15.1619	15.1612	14.9694	15.1374	15.5505	15.045
AP1S1	Q1JQ98	3	17.2379	17.5029	17.7724	17.0588	16.8281	17.2081	17.5261	17.6966
VPS16	F1MQ47;Q5E9L7	16	17.1949	16.993	17.1879	17.059	16.9652	16.9233	16.9036	16.9427
NIT1	Q32LH4;A0AAA9RRT9	8	17.0292	16.7883	16.95	17.2406	17.2577	16.9952	17.1611	17.1778
GTF3C3	A0A3Q1M0Z5	5	14.1417	13.8463	14.1559	14.0276	14.118	14.3629	13.9561	13.8783
CCM2	E1B8H2	8	14.1761	13.9614	13.9286	14.0933	14.4453	14.1096	14.2424	14.1401
GNPTG	Q58CS8;A0AAA9S597	2	13.2955	14.2964	13.4985	13.4117	13.9492	13.9089	13.806	13.7394
UTP6	F6R8I1	9	15.1169	15.1133	15.3725	14.8301	14.8372	15.0132	15.0868	15.1094
TOR1B	F1MBM5	5	15.4877	15.3254	15.9487	16.1812	16.2011	16.0008	16.146	15.7879
CORO1C	A0AAA9SY31	12	17.9013	18.2628	17.2178	17.7831	17.9477	17.8341	17.7973	17.901
LOC534913	A0AAA9SND9	8	13.5441	13.9267	13.2417	14.4902	14.6539	14.7186	14.3236	14.3208
ACOX3	A4IFA4	7	13.7031	14.4934	15.1473	14.4535	14.5613	14.7728	14.8149	14.745
TCP11L1	A0A3Q1LT06	2	12.7257	12.0145	11.5621	12.3726	12.3243	12.2731	12.9514	11.8108
PPM1G	P79126	9	16.5508	16.5542	16.4173	16.6079	16.4732	16.5031	16.5261	16.6271
YLPM1	E1BGC5	25	15.6317	15.1883	15.3303	15.4447	15.4138	15.3933	15.1563	15.3832
PGM1	Q08DP0;F1MJS4	19	18.1996	18.4001	18.168	18.1792	18.2773	18.1365	18.3198	18.2887
SEPTIN3	A0AAA9SQ79;Q08DM7	5	15.3166	15.0519	14.9767	14.6997	15.2717	14.5069	14.4554	14.1756
TNKS1BP1	A0A3Q1N4H7	43	17.2101	17.0563	16.8156	16.995	17.0384	16.8149	16.9961	16.9706
DENND4B	A0AAA9S3D2	2	13.3062	13.3665	13.1773	13.1919	13.5511	13.224	13.7025	13.184
MTREX	A0AAF6DLQ5	26	17.2273	17.1267	17.0603	17.0425	17.0797	17.212	17.1202	17.2085
PRG4	G3MYM8	6	16.0002	16.5689	15.8288	15.4511	16.6576	16.6135	15.884	15.3568
INTS8	A5PJS8	4	14.798	14.6835	14.8576	14.7925	14.5962	14.837	14.5048	14.7802
PSMA5	A0AAF6Z8I1;Q5E987	10	18.7907	18.7844	18.9253	18.8026	18.8691	18.7267	18.9705	18.9232
NFS1	A0AAA9T7J9	10	15.0397	14.759	15.3798	15.0517	15.1076	15.2995	15.2289	15.0668
IPO5	F1MPE5	33	18.2839	18.3631	18.2154	18.1789	18.3114	18.236	18.2165	18.2113
QNG1	Q1JP73;F1MEP1	15	16.909	16.8585	16.5518	16.9855	16.9443	16.9069	17.1727	17.1007
IFIT2	F1MQW8	13	NA	NA	NA	NA	16.2211	16.1143	16.0559	16.2853
CD9	A0AAA9RTY1;P30932	3	17.3718	17.3467	17.7942	17.7235	17.8282	17.8428	17.9215	17.1125
TNPO3	A5D7C4	20	15.8471	15.9687	15.8108	15.8316	15.7833	15.6419	15.8182	15.8972
PEX1	A0AAA9S682	8	13.582	13.495	13.8504	13.6179	13.8459	13.9206	13.4364	13.483
PSMB4	Q3T108	4	18.3991	18.2537	18.2641	18.4519	18.5261	18.418	18.521	18.5658
FMNL3	A0AAA9TGU4	22	16.3456	16.567	17.1269	16.8769	16.7496	16.7127	16.9332	16.8658
GNL3	E1BMI6	8	14.8337	15.1877	15.3674	14.6724	14.8393	14.9432	14.874	14.8682
MEMO1	Q2HJH7;A0AAA9SKU6	9	17.1641	17.2728	16.9128	17.0466	17.2864	17.2713	17.2442	17.3028
AEBP1	F1N1C7	20	17.2756	17.3485	16.8802	17.0486	17.0291	16.6193	16.6783	16.7362
HOOK3	E1B7Q0	12	15.628	15.2748	14.9571	15.0827	15.3422	15.0784	15.1168	15.1149
CPD	E1BLR9	13	19.3602	19.5637	19.8993	19.0906	19.0735	19.2877	19.615	19.4265
FDFT1	Q32KR6;A0AAA9TVZ3	19	17.6015	17.4892	18.4959	18.1761	18.2989	18.4131	18.3194	17.9302
RPS7	A6H769	5	18.8162	18.8041	19.4058	18.7887	18.73	18.9	18.9836	18.768
DNMT1	Q24K09;F2Z4J5	16	17.194	17.3666	17.543	17.2389	17.148	17.2145	17.2592	17.3999
RXRB	A0AAF6DMC7	5	16.154	15.9345	15.5209	15.7647	16.1708	15.7949	15.8202	15.8391
GAK	F1MIB2	19	20.2929	20.4	20.5712	20.3528	20.2781	20.245	20.4513	20.6009
SPG11	F1MEB4	14	15.2667	15.2838	15.3368	15.2402	14.9933	15.2422	14.9511	14.863
EIF5B	F1N6Y7	23	16.6038	16.8216	16.7942	16.6624	16.6174	16.4978	16.8177	16.7781
ADHFE1	A6QP15	6	13.539	13.1703	14.0982	14.836	14.5597	14.5683	14.81	14.8684
OS9	Q3MHX6;F1MX65	11	14.4089	14.3299	14.8643	14.3337	14.6419	14.8816	14.9665	14.5423
MCM3	A4FUD9;A0AAF6YVB0	18	15.1412	16.1143	15.1801	15.09	14.7179	14.6301	15.2674	15.2534
TBC1D10A	F1MB46	7	14.7439	14.9626	14.8207	14.8351	14.754	14.907	14.4916	14.5769
NSMCE1	Q3T0X7;A0A3Q1MQS1	2	14.3395	14.0537	13.5924	13.5013	14.3558	14.2133	13.8923	NA
FGF2	A0AAF6YP72;P03969	5	16.3849	15.9458	15.773	16.2252	16.2591	16.0233	16.3273	16.1374
COPZ1	A0AAF6YNH6;P35604	6	16.4663	16.1033	16.1649	15.9359	16.3436	16.608	16.5588	16.4889
CYB5R1	Q3MHW9	9	16.3854	16.8563	17.9596	16.9508	16.7627	16.8346	17.3277	16.7537
TTC27	Q17QZ7;A0AAA9SPB9	13	14.1439	14.6146	14.2246	14.2684	14.5008	14.299	14.4757	14.5418
LTA4H	Q3SZH7	23	17.9932	18.1253	17.9032	18.2101	18.1748	18.1676	18.204	18.379
PUS7	F1ML88;Q08DI8	7	13.9316	13.9583	13.8824	14.059	14.0345	13.8245	13.6649	14.1102
TBC1D1	O97790	3	13.2471	12.8747	12.0378	13.3879	13.8097	13.7048	13.4975	13.6957
HK1	A0A3S5ZPF0;P27595	23	17.7108	17.8233	18.5754	17.7482	17.8473	17.9188	18.0854	17.7289
SMC5	F1MPW4	5	14.2667	14.2033	13.9702	13.8065	14.1174	14.0583	14.0295	14.0251
STAT3	F1MX38;P61635	30	17.0108	16.9199	16.6178	17.0655	17.0665	16.9603	16.8838	17.0387
RDH10	Q8HZT6	12	15.7194	14.605	15.7483	16.3556	16.4201	16.3288	16.0994	15.3243
ARL1	Q2YDM1	7	18.1603	18.1594	18.0131	18.1413	18.2126	18.0564	18.1061	18.1708
ADAR	F1MUM9	29	16.6864	16.3155	16.2897	16.2771	17.6054	17.5998	17.744	17.6856
SMS	Q3SZA5	20	20.638	20.3354	20.1291	21.0981	20.2479	20.2409	20.2569	21.0179
CYB5R3	P07514;A0A3Q1LZ18	16	18.7379	18.6967	19.2988	19.0621	19.1179	19.2119	19.2395	18.7128
ATE1	A0AAA9SIF0	15	16.5652	16.3555	16.2445	16.5045	16.5887	16.3258	16.2951	16.3375
RIBC2	Q32LJ7;A0AAF6YL38	5	13.7212	13.8147	14.0245	13.7036	13.8923	14.1326	14.0511	13.8994
ASAP2	A0A3Q1M154	15	16.1443	16.2195	16.1295	16.5135	16.2545	16.6013	16.3261	16.5853
ZER1	F1MJP6	7	13.7549	13.9548	14.008	14.1184	14.0776	14.08	14.0222	14.2927
DOCK5	A0A3Q1MC59	12	14.3353	14.9094	15.0937	14.3948	14.5495	14.5724	14.8344	14.9012
PSMA6	Q2YDE4;A0AAA9S278	13	18.3672	18.1706	18.1962	18.2522	18.3014	18.211	18.5095	18.4513
KHSRP	A0A3Q1NE05	23	18.9387	18.6296	18.505	18.7327	18.6418	18.4712	18.471	18.4544
DOCK1	F1MIX6	33	16.8315	16.6641	16.6636	16.7073	16.6759	16.5875	16.5561	16.6035
PDCD10	Q0VCQ6	8	16.7707	16.9756	16.9594	16.9058	17.1266	16.9496	16.9809	17.0048
UBAP2L	A0AAA9TFY7	12	16.3266	16.0733	16.6418	16.4219	16.0033	16.1311	16.1682	16.2848
INHCA	A0A3Q1MUV9	35	15.9838	16.84	15.9761	16.8981	16.9422	16.9467	16.6778	16.6444
ZFAND6	Q3SZY7	3	13.0038	13.4389	13.745	13.6055	13.2594	12.5298	13.1236	13.6527
PDIA5	A0AAA9RXH7;Q2KIL5	17	16.7585	16.6264	16.5343	16.5085	16.4664	16.4274	16.4624	16.5326
EDF1	Q3T0V7	4	16.2908	16.5698	16.3521	16.3184	16.402	16.4655	16.2024	16.3669
YTHDC2	F1MNU7	3	12.5643	12.0656	13.0488	12.2947	12.7442	12.4722	13.1625	13.0704
F13A1	P12260;F1MW44	14	16.5946	17.0466	16.5704	16.6036	17.5143	17.597	17.1183	17.2095
MERTK	F1N381	4	13.3759	13.6107	13.9572	13.7325	13.7318	13.8961	13.7981	NA
DOHH	Q0VC53	8	16.5945	16.6606	16.787	16.4632	17.059	16.9571	16.554	16.5583
DGKZ	A0AAA9SCA8	3	13.622	14.3025	14.1644	13.882	13.9524	13.5677	14.234	13.7542
CNOT4	A0A3Q1N546	2	14.0323	14.1524	14.4138	14.6052	14.1718	NA	13.9752	14.4621
VPS51	A6QQ47;F1MJ84	17	15.9548	15.801	15.8272	15.8054	16.0012	15.889	15.8778	15.9093
FAM3C	A5PKI3	6	15.8203	16.3652	16.4573	16.2878	16.2092	16.6936	16.7118	16.2854
TOLLIP	Q2LGB5;A0AAF6YRW2	6	17.0269	16.952	16.9208	16.9505	17.0575	17.1365	17.4082	17.4394
GNPAT	A4IF87;A0A3Q1LQH8	9	14.1367	14.4313	15.27	13.9387	13.9659	14.2745	14.8517	14.6874
FGG	F1MGU7;P12799	23	19.7126	20.7749	20.0326	20.5065	20.9972	21.1634	20.3396	20.3635
PSMD3	Q2KJ46	23	17.0659	17.121	17.1592	16.9303	17.0767	17.1332	17.0056	17.0866
TTC1	Q3ZBR5	9	15.775	15.8491	15.6927	15.5085	15.7675	15.597	15.6514	15.8989
ATXN3	A0AAA9SGW9;A0A3Q1MF75	7	16.8873	16.4642	16.7238	16.7447	17.2297	17.2885	17.0866	17.3539
EP400	A0AAA9U053	11	15.9591	15.5001	15.8753	15.4847	15.8574	16.0931	15.9113	15.7724
CUL4A	F1N3S4	22	17.3034	17.1194	16.9937	17.1555	17.2815	17.2338	17.1852	17.3428
UNC45A	A0AAA9T3T4	26	16.5853	16.6095	16.5898	16.7461	16.6139	16.5418	16.825	16.6723
DNAH9	F1MJJ0	32	16.4699	16.6352	16.7856	16.2462	16.4343	16.7755	16.6807	16.6932
MACROH2A2	Q1LZ92	14	17.7278	17.944	18.5048	18.5427	18.312	18.4965	18.488	18.0943
MTA1	A0A3Q1MK17	9	15.7317	15.345	15.6296	15.415	15.5387	15.5595	15.4222	15.5411
PHYH	A0AAF6YRS4;O18778	9	15.2422	15.6989	16.0417	15.0232	15.5211	15.7071	15.6463	16.1214
WDR24	F1MJS7	5	12.9323	13.0238	13.4242	13.149	12.8678	12.9874	13.1269	12.9775
ICA1	A0A3Q1LSW7	6	16.911	16.7055	16.7232	17.0307	17.1339	17.1168	17.064	17.118
ZC3H14	Q3ZC82	13	16.3688	16.018	16.2782	16.1004	16.1127	16.0102	16.0774	16.2738
TPM2	Q5KR48;A0AAA9RWG3	9	22.1302	22.2522	21.6325	22.7274	21.8974	21.836	21.8126	21.8376
ZNF259	Q2TBX0	12	16.036	16.2262	16.1366	16.022	16.3051	16.1311	16.0657	16.2475
PPP2R1A	F6QI68;Q32PI5	15	19.7129	19.5121	19.4236	19.5303	19.639	19.5268	19.5498	19.6077
NNT	P11024	26	17.0408	16.7898	18.189	17.3018	17.7373	17.9429	17.9755	17.2086
ARFGAP2	A1L520;A0AAA9SHG7	15	15.5831	15.4738	15.4754	15.5832	15.389	15.4916	15.4235	15.6618
POLR3A	A4IF62	8	14.6096	14.5571	14.8902	14.6256	14.6009	14.9137	14.6219	14.7326
PDCL3	A0AAA9T5C0;Q0VCW8	6	18.0159	18.0997	18.2066	18.1172	17.799	18.1556	17.0145	17.3569
ZYX	F6PUM3	15	16.5014	16.6696	16.4481	16.7429	16.1606	16.0725	16.1057	16.1551
TBRG4	Q3SZK4;A0AAA9S1P7	11	15.3351	15.7157	16.2516	15.9622	15.6628	15.6986	16.0794	16.0878
LOC506828	F1MJK3	51	16.8505	17.8689	16.758	17.8025	18.8228	18.5044	17.2909	17.2843
YTHDF3	A0A3Q1LJ04	8	15.8845	16.0291	15.8348	16.0367	15.9052	15.9783	15.7733	15.9181
RABGEF1	G3X6D4;O18973	9	15.7798	15.4897	15.6801	15.9821	15.7125	15.5716	15.8053	15.8378
RFC4	A0A3Q1M190	5	15.3948	15.2789	15.1584	14.7815	15.156	14.9961	14.9029	15.0674
RPL24	Q862I1;A0AAA9TQX1	5	18.3192	18.5041	19.1928	18.3881	18.379	18.5482	18.5686	18.7115
HNRNPL	E1BIB4	16	19.7663	19.4984	19.3115	19.5577	19.5046	19.6491	19.5334	19.5441
PCBP2	F6RMB4	8	20.9134	20.811	20.6769	20.8161	20.8337	20.8522	20.8052	20.7388
PCBP1	Q5E9A3	9	20.5874	20.3405	20.3645	20.3294	20.3976	20.3161	20.2394	20.3787
GAPDH	P10096;A0A3Q1LPH5	11	22.4608	22.6058	22.4105	22.5976	22.7326	22.5006	22.6053	22.5421
DNAH5	E1BMG2	45	15.5538	15.6413	16.0176	15.4069	15.7723	15.9826	15.8717	15.8156
PAN2	E1BML0	5	13.883	13.7717	13.6635	13.5695	13.7091	13.719	13.642	13.7908
TSNAX	G3MY03	7	16.1336	16.2797	16.0287	16.3748	16.4749	16.2302	16.1612	16.3295
SMAD2	Q1W668;E1BE92	2	15.4745	15.3287	15.1717	15.4372	15.2769	15.0685	15.0726	15.0482
SMAD3	F1MUZ3	3	15.1397	15.1078	14.9682	15.0362	15.1364	15.0826	15.0501	15.034
MRPS9	A0AAA9TAD0;Q58DQ5	9	14.1687	14.5414	15.2291	13.9351	14.2224	14.0702	14.4263	14.6295
EIF2A	A0AAA9SB04	18	16.2458	16.4441	16.4888	16.3604	16.3495	16.2957	16.3724	16.4664
RPSA	P26452	10	20.4414	20.6279	20.623	20.4343	20.3021	20.3651	20.2882	20.4649
COPG2	A2VE21	23	15.8043	15.5666	15.9104	15.4996	15.6555	15.7603	15.5498	15.4943
AGRN	A0AAA9TR62	40	16.2385	16.1604	15.9146	16.6332	16.901	16.5981	17.1145	17.0839
POLR2G	Q5E9B8;A0AAF6YTR5	7	15.1559	15.1757	15.2257	15.217	15.2252	15.2994	15.168	15.2232
LOC511531	E1B7Z4	6	15.7266	15.4945	15.2652	15.4148	15.9947	15.7807	16.4944	16.5338
RXRA	A0AAA9T9C1	3	15.1736	15.8291	14.4563	14.9683	14.601	14.8717	14.9059	15.3849
NR2C2	A0A3Q1LZU3	9	18.0295	17.5489	17.592	17.7439	17.3831	17.278	17.5363	17.5276
NR2F1	Q9TTR8	2	14.5435	13.9	14.0777	13.8205	14.0181	13.5743	13.6883	13.6595
NR2F2	Q9TTR7	4	15.5286	15.0662	14.9559	14.8605	15.0876	15.0673	14.7475	14.4912
PECR	A0AAA9TYP4	7	15.9565	16.3719	17.4353	16.2319	15.7676	16.2233	16.2824	16.5069
PAFAH1B3	A0AAF7ABT5;Q29460	9	19.2356	19.5076	19.0002	19.3434	19.523	19.3408	19.2671	19.5641
YEATS2	A0AAA9SZB7	6	13.4456	13.172	13.8294	13.5764	13.4127	13.5961	13.2946	13.2503
HECTD1	E1BLD1	32	15.645	15.7268	15.8527	15.7392	15.7797	15.7127	15.9409	15.8447
IPO9	G5E567	13	18.8102	18.8868	18.6981	18.6652	18.6273	18.3496	18.7988	18.7139
SOD2	P41976;E1BHL1	5	18.4702	18.3027	18.5069	18.5339	18.4869	18.5177	19.1529	19.0939
PSMD12	A0AAF6YJJ1;Q2KJ25	16	16.5499	16.6841	16.7648	16.4517	16.5387	16.6551	16.5157	16.6899
GFM1	A0AAA9TGR1	16	15.1247	15.5498	16.322	15.3002	15.1214	15.1932	15.9766	15.7949
ATP6V0A1	Q29466;F1MJV0	8	14.7044	15.1402	15.3056	14.7699	15.0337	15.088	15.094	14.8502
FNBP1L	A0A3Q1MAC0	14	15.98	15.9504	15.6175	16.2365	16.0845	15.8297	16.0496	16.0818
PSMB5	Q32KL2	10	17.4944	17.6049	17.3857	17.5271	17.3948	17.2937	17.4489	17.4535
PHB2	Q2HJ97	14	19.5007	19.6811	20.8213	19.8701	19.7607	19.9131	20.3409	19.9024
ADA	A0A3Q1M5V8;P56658	22	18.011	18.429	17.6893	17.7611	18.2739	18.345	18.1747	18.5048
HMOX1	Q5E9F2	13	16.7812	17.1704	17.5181	16.8113	17.5587	17.6999	17.6641	17.2584
HMBS	Q2KIN5	9	16.3286	16.2419	16.1881	16.205	16.5564	16.4321	16.0722	16.1963
FERMT2	A7MB21	30	18.1278	18.2181	17.6972	18.0873	17.856	17.7222	17.6314	17.6992
GSTT1	Q2NL00	10	15.6777	16.6967	16.0891	16.2428	17.6986	17.6065	16.0632	15.9501
EZR	P31976	20	20.5359	20.9917	20.2175	20.8831	20.413	20.4012	20.4549	20.7421
MFAP1	Q5EA98	6	17.2624	16.7914	17.3678	16.8972	16.8995	17.153	17.1299	17.0618
FKBP5	G3MXV0	25	18.2885	17.8942	17.65	18.119	17.9435	17.9284	18.0602	18.3072
EPS15L1	A0A3Q1MMI6;A0A3Q1LKG1	25	16.278	15.987	16.1409	15.9645	16.0142	15.8077	15.9764	15.9427
HSPA5	Q0VCX2	26	21.934	22.0617	22.2205	22.0516	21.8167	21.8079	22.1249	21.969
HCLS1	A0AAA9T1U4	10	15.0207	14.826	14.8461	14.9755	15.5511	15.6843	15.4374	15.6638
NXF1	Q1RMS5	16	16.5472	16.2868	16.227	16.1646	16.1433	16.2536	16.1531	16.1911
CXADR	A0A3Q1MQS2;Q8WMV3	10	16.0186	15.8365	16.6886	16.2942	16.2192	16.3881	16.5543	16.2601
AP2A2	A0A3Q1LIW3;Q0VCK5	25	17.4799	17.3874	17.2234	17.2983	17.2655	17.1015	17.2021	17.258
CACNA2D1	A0AAA9TH89	14	15.1723	14.8203	15.1182	15.2369	15.1522	14.7612	15.6794	14.8778
ACP1	A0AAF6Z8C2;P11064	6	17.9904	18.5658	17.8268	18.5019	18.478	18.3073	18.2113	18.2663
SERPINE2	Q8HZY1	11	16.0213	16.1461	15.8021	15.7012	15.3824	15.6606	15.0592	15.0128
ODR4	F1N582	9	14.7796	15.2399	15.6544	15.3632	15.287	15.3717	15.2977	15.1222
SAE1	A2VE14	17	17.4526	17.5796	16.8707	17.6811	17.2473	17.2321	16.9039	17.2177
DOCK7	F1N3L7	36	17.0479	16.602	16.9273	17.2243	17.1881	17.2654	16.966	16.9735
SEC24B	E1BPR4	21	16.6696	16.529	16.7231	16.6921	16.6742	16.5765	16.674	16.7386
DLST	A0A3Q1MHE5;P11179	9	18.6536	18.742	19.8042	18.7668	19.0165	19.2879	19.3234	19.0847
RSL1D1	A4FV97	12	16.1631	16.4149	16.5423	16.0778	16.1664	16.3574	16.201	16.4062
GFM2	A0AAF6ZIV2;A6QNM2	4	12.5864	12.6011	13.7329	12.9211	13.8813	14.4	14.205	13.8533
TMEM192	E1BL89	2	13.3446	NA	14.0813	14.1373	14.0347	NA	14.2887	13.7526
PEX19	Q3SZD1	7	15.0743	15.1648	15.4345	15.0796	15.0556	15.1047	15.2075	15.2668
EGLN1	A0A3Q1M2B6	13	18.1763	18.3297	19.0031	18.2838	18.2595	18.2306	18.488	18.5898
TCERG1	A0A3Q1NC33	23	16.8184	16.7447	16.6568	16.6966	16.6628	16.5168	16.6092	16.7539
APOA1	A0AAA9SEH0;P15497	23	23.1283	23.6022	23.008	23.6974	24.2166	24.1333	23.6559	23.7264
ERCC5	Q3B7N6	12	15.0217	14.5926	14.7785	14.7848	14.6932	14.6925	14.5825	14.8331
SUCLG1	F1MZ38;Q58DR8	10	19.3176	19.1809	20.1484	19.3623	19.4525	19.743	19.7684	19.6704
DIDO1	E1BCR2	22	14.8965	14.4469	14.7476	14.7275	14.7232	14.7301	14.779	14.7705
CD2AP	A0A3Q1N369	23	17.0381	16.9022	17.4214	16.893	17.1218	17.1979	17.3818	17.448
DBI	P07107	7	22.0646	22.348	21.8372	22.2836	22.3994	22.6167	22.3109	22.3382
PHPT1	Q32PA4	8	19.2199	19.3753	19.3954	19.1376	19.5355	19.4174	19.3013	19.4268
NENF	Q1JQA5	6	16.0711	15.5374	16.1047	15.7726	16.0046	15.9354	15.9433	15.8524
ARPC5	Q3SYX9;G3MXC8	6	18.5742	18.7009	18.4388	18.5636	18.7543	18.6608	18.6963	18.8341
FCSK	A6QP44	25	17.7502	17.4281	17.4766	17.706	17.6572	17.4245	17.2735	17.2625
SRPRA	Q3MHE8	15	17.4528	17.7149	17.7133	17.8076	17.7564	17.872	18.0451	17.8057
PPIP5K2	A0A3Q1M2A3	10	16.1845	16.3505	16.4718	16.2674	16.3244	15.9063	16.1151	16.2521
GRPEL1	Q3SZC1	10	16.9575	16.7899	17.5069	17.1483	17.4473	17.6634	17.6432	17.3391
PPIP5K1	A7Z050;A0A452DJE6	3	14.54	14.3241	15.2993	15.0843	15.0282	15.0289	15.1089	14.8078
SHMT1	A0A140T896;Q5E9P9	8	14.5419	14.2683	13.8422	14.3832	14.344	14.082	14.4819	14.6459
CRPPA	E1BCH6	6	14.8759	14.5396	14.3664	14.873	14.6704	14.5	14.839	14.7673
RAP2A	E1BNQ3	2	12.8895	NA	14.0078	13.2538	13.6375	13.0647	13.4003	13.0172
RAP2B	A4IFU2	2	13.0083	13.3492	13.2355	13.27	13.1217	13.5537	13.9897	13.3959
RHEB	Q56JV3;F2Z4I1	3	16.7104	16.6929	16.9787	17.0139	17.0482	17.0544	17.1015	17.0128
NCSTN	A0A3Q1MDC6	5	15.4983	15.669	15.7582	15.7929	15.7282	15.5814	16.0987	15.7966
ABHD10	A0AAF6YMI2;Q5E9H9	7	16.9835	16.5583	17.2277	16.9539	16.9668	17.2059	17.0815	16.9005
HSD17B14	A0AAF6YTC1;Q9MYP6	3	13.7002	13.1734	13.5777	14.6147	13.7102	13.8388	14.5967	14.9207
UACA	A0A3Q1LN88;Q8HYY4	32	16.7796	16.7711	16.9208	16.883	16.6862	16.8461	16.8744	16.8712
UHRF2	F1MFX7	8	13.8517	13.9773	14.0173	13.7517	13.7941	13.7582	14.0678	13.9596
SENP1	F1MG84	2	16.1554	NA	16.3963	16.068	15.6242	16.2971	15.7066	16.2066
RNASET2	A0AAA9TWF6	7	17.3361	17.6464	17.0223	17.0412	17.0867	17.2137	17.4773	17.773
EXOC4	A6QLD1	22	16.8905	16.7377	16.7318	16.8019	16.8364	16.7266	16.716	16.8144
USE1	F6QDZ3	7	14.9319	14.7895	15.6961	15.248	15.0811	15.1427	14.8142	14.7499
ENOSF1	Q2KIA9	16	14.7799	15.6085	14.476	15.2588	15.5059	15.4085	15.3191	15.6102
RAB22A	F1MHP4	4	15.7057	16.0039	15.6764	16.0154	15.6786	15.559	15.8497	15.5915
TXNDC5	A0A3Q1LUG9	15	19.3393	18.9461	19.531	19.228	19.4082	19.3118	19.1093	19.0785
ECHDC2	A0A452DIJ4;Q2TBT3	8	16.2392	15.6055	16.5076	16.1999	16.9716	17.1409	16.7919	16.5261
RAP2C	Q08DI5	4	15.8368	16.4228	16.4291	15.9722	16.1917	16.1342	16.6569	16.3233
SCFD2	A0AAA9SE28	16	15.7552	15.5714	16.201	15.8267	15.8382	15.936	15.7675	15.6903
SMUG1	Q59I47	11	16.6019	16.5896	16.1874	16.4933	16.6369	16.5114	16.6131	16.5837
TSC22D4	E1BFH5	6	15.6061	15.4074	15.6659	15.4806	15.7335	15.6264	15.657	15.7111
GTF3C1	E1BNY8	14	15.3903	15.2671	15.2972	14.9779	15.1255	14.9943	14.8771	14.9323
AFG1L	E1BQ18	4	13.6127	13.2089	14.1888	13.3607	13.109	13.4715	13.5164	NA
ARPC5L	Q5E963	5	17.4263	17.581	17.3483	17.2895	17.7339	17.6915	17.5665	17.7899
CLCC1	Q1LZF8	11	14.8743	14.7693	15.2118	15.2801	15.4183	15.1612	15.3266	14.9433
CDC42BPA	F1MH45	7	13.8949	13.6609	13.5516	13.8556	13.1075	13.0978	13.2315	13.3448
XPOT	E1B8Q8	21	17.7523	17.5468	17.7063	17.5577	17.4733	17.3397	17.4535	17.4883
VKORC1L1	A0AAA9SWV9	2	15.243	15.1321	15.892	15.5821	15.8645	16.1209	16.3169	15.6041
VKORC1	A0AAF6YGJ2;Q6B4J2	2	15.5939	15.5868	16.3576	15.9807	16.1355	15.9528	16.2427	15.8053
FBLN2	E1BEB4	30	16.54	18.8019	16.7778	16.3464	16.0898	15.7676	16.3391	16.1741
EIF2B1	Q0IIF2;A0AAF6YRC9	12	16.5091	16.6411	16.6689	16.702	16.5044	16.4109	16.3758	16.3843
DMD	A0AAA9T1N8	32	16.228	15.8163	15.8536	16.5281	15.8858	15.8863	15.7883	15.8325
COL6A2	A0AAA9TXG2	23	17.5428	17.5483	17.1974	18.2297	18.0124	17.0515	18.1158	17.1107
COPG1	A0A140T886;P53620	34	18.279	18.2079	17.9337	18.0732	18.2273	18.2576	18.1606	18.2088
HGH1	F1MW97	7	15.0608	15.4236	15.3094	14.8666	15.2479	15.2283	15.2915	15.4623
DHRS7	Q24K14	9	14.5572	13.6341	14.9106	14.9255	15.9885	16.1137	16.0283	15.4088
TRIM21	Q7YRV4	14	17.4964	17.6684	18.1225	17.5011	18.3848	18.3399	18.6136	18.6636
MAP1S	F1N1H2;A6QQ70	26	16.6227	16.4911	16.3245	16.8552	16.4408	16.221	16.5906	16.4931
TIMM10B	Q3SZW4;A0AAA9SX31	3	13.233	13.402	13.9065	13.5851	13.6001	13.5111	13.9874	13.567
MTA2	F6RJB2	14	17.5509	17.3396	17.5823	17.4137	17.4522	17.5762	17.4432	17.4125
PRAF2	Q2KHX3	2	15.3665	15.1609	15.992	15.6356	15.6467	15.5831	16.1804	15.3337
HYCC1	A0A3Q1LX28	5	15.3912	15.0752	14.6955	14.9179	15.0206	14.567	14.8418	14.8294
IKBKB	A0AAA9SIT5;Q95KV0	17	15.6217	15.6657	15.8209	15.8094	15.4293	15.5117	15.7805	15.8395
REXO2	A2VE52	7	15.9216	16.7184	16.6657	15.707	15.6313	15.6463	16.2124	16.4113
COPA	Q27954;A0A3Q1MCV5	57	18.6066	18.4867	18.3452	18.3235	18.4875	18.5165	18.4103	18.4876
PTX3	A0AAA9SX10;Q0VCG9	7	13.5328	14.2666	14.228	13.7734	15.1752	15.3163	15.575	15.071
CCT3	Q3T0K2	28	18.9749	19.027	18.8752	18.9438	19.0633	19.0979	19.0425	19.0621
MRPL46	Q3SZ22	9	14.4002	14.7246	15.4532	14.3054	14.2694	14.4417	14.7151	14.8232
ULK3	F1N332	10	14.8122	14.7669	15.0786	14.8992	14.809	14.6559	14.7125	14.8185
SEMA4D	A0A3Q1LQU8	5	14.0408	13.5288	13.5975	13.9235	13.9039	13.8476	14.4479	14.2225
PDLIM1	Q5E9E1;A6H7E3	15	18.8264	18.6571	18.7695	18.5507	18.3391	18.3685	18.4071	18.5003
AP3D1	A0AAA9ST90;Q865S1	30	16.7347	16.6426	16.4956	16.6979	16.5895	16.5596	16.6781	16.6522
APEH	P80227;A0AAA9TE85	14	16.5437	16.5751	16.7354	16.672	16.7551	16.5257	16.6622	16.6525
SRSF6	F1MXY9;Q3B7L6	3	17.668	17.4834	18.1103	17.1718	17.2911	17.4169	17.2534	17.7479
GAS6	A0AAA9SCN2	5	13.376	13.7203	13.3902	12.9969	13.4707	13.229	13.3859	13.1576
PDIA6	A0A3Q1MRD2;F6QH94	15	20.3827	20.2854	20.3918	20.4747	20.2757	20.3164	20.3159	20.3229
GCAT	A0AAA9SIL2;Q0P5L8	7	15.3939	15.3561	15.5061	15.3758	15.7798	15.722	15.7373	15.7201
ERAP1	F1MU34	27	15.5142	16.4217	15.6883	16.0024	16.3706	16.3497	16.1279	15.9418
MINDY3	Q0IIH8	2	14.4132	14.543	14.6042	14.6527	14.596	14.6031	14.8848	14.9366
AOC3	O46406;Q9TTK6;Q29437;A0A452DHX8	15	19.5785	20.6006	19.3193	20.3659	20.7819	20.7401	20.0924	20.1178
STK3	A0JN96	11	15.2969	15.3176	15.5617	15.483	15.7065	15.6528	15.2176	15.5383
PTK2B	A0A3Q1LVP1	9	15.5485	16.1454	14.8984	14.9768	15.1793	15.1038	15.2091	15.5778
NUP210	F1MPW7	32	14.9454	14.803	15.6554	15.1681	15.6813	15.8589	15.5527	15.1969
METAP2	Q3ZC89;A0AAA9U2I8	12	16.9541	17.4405	17.1296	17.2968	17.1905	17.0198	17.193	17.3379
GLYR1	A4FUF0	18	16.8152	16.2992	16.515	16.3326	16.4408	16.4749	16.4378	16.4953
VIRMA	A0A3Q1MKW0	14	16.7554	16.813	16.8445	16.5778	16.5237	16.5942	16.5545	16.6464
NCOA5	A0A3Q1M1S1	14	16.9143	16.7228	16.5964	16.8311	16.7782	16.9126	16.7148	16.8192
PFKFB2	P26285	9	15.4808	15.2528	15.2786	15.6402	15.6353	15.5725	15.5639	15.7341
REEP6	A0AAA9TTE3;Q32LG5	3	14.1066	14.6537	14.9921	14.116	14.0396	14.2027	14.5099	14.027
FSD1L	A0A3Q1LQM2	7	14.3925	14.2085	14.7116	15.3171	14.985	15.1078	14.5998	14.7148
PCMT1	P15246;G3MZZ6	9	16.8993	17.1616	16.8203	17.1297	17.2212	16.8186	16.9617	16.9021
RBP1	P02694;A0AAA9TFY6	3	17.3696	17.5993	17.4804	17.4772	17.8962	17.6918	17.647	17.5745
TDRD7	A6QLE1	14	14.9195	14.9804	14.8798	14.879	15.5843	15.7545	15.7665	15.8348
CSNK2A1	P68399	16	17.4336	17.312	17.2483	17.3746	17.4971	17.5469	17.5541	17.6126
RBM15B	F6RM04;A0A3Q1N5U4;G3N2G0	9	14.0831	13.8051	13.945	13.6155	14.0026	13.7314	13.8721	13.9151
PUDP	A0AAA9TCA1	8	15.5978	16.5697	15.4257	15.8413	15.8718	15.5955	15.7235	16.0767
IFIT5	Q17QZ9	15	17.08	16.9258	16.6624	17.1163	19.0941	19.0854	19.1832	19.1714
SORD	Q58D31;A0A3Q1M465	9	15.8913	16.5099	15.735	16.272	16.9196	16.6605	16.8433	16.8767
MARS2	A6H7E1	7	14.583	15.2015	16.0052	15.1262	14.9012	15.1851	15.356	15.3233
SELENOP	P49907	3	15.9992	16.6195	15.593	16.7171	16.6408	16.6156	16.2075	16.154
RBM3	F6RBQ9	4	17.1056	17.4156	17.0523	17.0557	16.9459	17.1778	16.9596	17.1266
TCAF2	A6QLU7;F1N3Y1	17	17.6004	18.5245	17.8279	18.0234	16.957	16.7965	17.6149	17.9803
PPP4R3A	F6R1L1	11	15.6056	15.3153	15.3858	15.3979	15.5057	15.4819	15.4998	15.5712
LRCH1	F1MDS5	14	15.6214	15.2932	15.5058	15.9483	16.0261	16.0756	15.7755	15.674
MYH9	F1MQ37	93	20.3503	20.5217	20.7693	20.384	20.4176	20.3862	20.5166	20.5675
KRT17	A1L595;A0A3Q1M4F4	10	16.6102	17.7606	18.3843	15.9562	15.7224	16.3828	17.7079	17.7543
EPS8L3	F1N4S3	8	13.3732	13.3186	13.9305	NA	13.4723	NA	14.3345	14.425
COLGALT1	A5PK45	11	15.4274	15.6072	15.5103	15.3405	15.2062	14.9161	15.183	14.9935
TMPO	F1MCA8	18	19.049	18.7891	18.7814	19.2291	19.085	19.2061	19.2751	19.2586
IDH1	A0A140T8A5;Q9XSG3;A0AAA9TJF1	21	20.8169	20.7706	21.1383	20.8847	20.8517	20.8761	21.1291	21.2093
CARMIL1	A0AAA9TV71	35	15.7672	15.8698	15.9737	16.3304	15.9496	15.7227	15.9369	16.0829
NTHL1	Q2KID2;A0AAF6ZHM1	4	14.8258	14.0239	14.2251	14.5	14.7927	14.8723	14.8628	14.1894
GPLD1	A0A3Q1MQZ5;P80109	15	16.7573	17.0082	16.4458	16.8067	16.9507	16.9921	17.3905	17.2498
SURF6	Q0VCY3	7	15.256	15.0748	15.4492	15.2309	14.6184	14.8469	14.7767	14.7842
SH3D19	A0AAA9T0N5	8	15.0925	14.9427	14.7787	15.3081	15.0469	14.8557	14.6568	14.4865
GPD2	A6QLU1	28	16.4577	16.6797	17.1405	16.7111	17.0506	16.9936	17.1604	16.6765
FGA	F6QND5;P02672	31	20.3489	21.4099	20.6773	21.1012	21.5239	21.7196	20.8612	20.9027
COL7A1	A0AAA9TK71	31	16.8092	16.3751	15.8379	16.0865	16.5953	16.0101	16.8875	16.2058
CBLB	G3N0D7	2	14.0494	NA	14.0387	14.2498	NA	13.9274	13.8096	13.7686
PRPF40A	A0A3Q1MF35	17	16.8635	16.5532	16.5344	16.5144	16.5356	16.6877	16.7794	16.8122
FNTA	P29702;A0AAA9S4G1	10	17.425	17.4492	17.3523	17.5288	17.4925	17.2239	17.3883	17.4176
STUB1	E1B7G3	14	16.359	16.473	16.6731	16.1891	16.4284	16.55	16.3701	16.6108
MSN	Q2HJ49	23	21.7198	22.0304	21.3615	21.637	21.7623	21.6189	21.5363	21.6895
DRAP1	Q2YDP3;A0AAF6YPG3	5	16.9651	17.1265	17.065	17.1595	17.0413	17.1029	16.9811	16.9723
PSAT1	A0A3S5ZPF7	13	19.0218	18.2702	18.9791	19.7434	19.7507	19.8041	19.4897	19.3928
PEX5	Q1RMV0	12	16.8303	17.2717	17.7514	17.009	16.9978	16.9661	17.1979	17.239
DDX46	A0A3Q1MR43	32	16.8603	16.7658	16.5822	16.6582	16.6976	16.7052	16.5118	16.663
SH3BP1	E1BH11	12	15.9389	15.9994	15.9119	15.9038	16.0992	15.8897	16.3628	16.5079
NEK3	A0AAA9SYW5	2	NA	12.307	12.2546	12.9195	12.321	11.9443	12.1527	12.5218
NDUFA2	G3MZ04;Q02370;F1MB80	4	16.4053	16.5097	17.3822	16.3634	16.4166	16.6972	16.6927	16.705
TREX1	F6QB70;Q9BG99	3	12.7379	12.7346	13.9986	13.1857	14.6828	15.0926	14.745	15.0256
MAK16	Q1RML7	3	14.0051	14.6614	14.9322	13.8817	NA	NA	14.3017	14.5034
SUGT1	Q2KIK0;A0AAA9S2A6	18	17.5442	17.3944	17.2512	17.52	17.4824	17.4289	17.4515	17.4427
PBXIP1	A6QLY7	15	15.7931	15.9892	16.6225	16.1688	16.4146	16.4436	16.4694	15.9875
IQGAP1	A0A3Q1MIB0	71	19.6659	19.7708	19.2616	19.5058	19.612	19.5254	19.6462	19.6671
RUVBL1	A7MBG8	19	18.7708	18.3786	18.5499	18.4502	18.6897	18.6839	18.6424	18.5708
NOC4L	F1MFW8	5	13.3536	13.5235	13.6157	13.2788	13.1112	13.4447	13.2564	13.617
TSFM	A0A452DIR5;P43896	9	16.7758	16.7974	17.3274	16.8508	17.1026	17.417	17.4575	17.3197
ATG3	Q0VCL3	6	16.0263	16.2228	16.2035	15.9866	16.4317	16.1789	16.3116	16.4654
EIF3A	A0AAA9S6A7	36	17.6119	17.6114	17.6319	17.4817	17.6252	17.658	17.6612	17.6559
CHM	F1MS24	6	13.9738	13.873	13.8637	14.2147	14.3203	14.2728	13.6503	14.2714
CIAO2A	B0JYN4;Q3T0U7	4	15.853	16.2061	15.9096	15.8976	16.1727	16.0379	15.863	15.6048
SIL1	Q32KV6	4	15.1371	14.721	15.6469	15.5509	15.3482	15.5281	15.3071	14.9381
ABCB8	G3MYQ9	9	13.8722	14.1347	15.262	14.0117	14.3857	14.5165	14.787	14.5208
CRK	E1BQ32	13	17.3358	17.2291	17.1682	17.1191	17.3132	17.0318	17.161	17.1835
MPP7	A6QQZ7	14	15.3634	15.288	15.7207	15.8671	15.6534	15.8877	15.4794	15.5189
NT5C3B	F1MLB9	3	14.6955	14.4641	14.7456	14.827	14.3726	14.7503	14.2613	14.4493
XDH	P80457;F1MUT3	27	17.091	16.8335	16.5737	16.3588	16.6635	16.5761	16.261	16.5888
FTL	A0AAF6YR53;O46415;A0AAA9TZS7;A0A3Q1MM35	4	16.4033	16.5014	17.08	17.0183	17.0125	16.349	17.9296	17.1626
NT5DC2	E1BNI8	6	17.0619	17.0905	16.9068	16.9568	16.8676	16.9697	16.9724	16.8237
CMTR2	G3MZP6	4	13.6763	13.4418	14.0331	13.4184	14.3146	14.454	14.48	14.303
GFUS	A0A3Q1M2A1	12	17.5296	17.599	17.2803	17.624	17.6321	17.5163	17.6073	17.6265
ACAD11	Q0P5G8	9	15.3633	15.4652	15.6455	15.5297	15.3261	15.3172	15.5979	15.6736
KIAA1217	A0A3Q1N716	39	15.7523	15.5488	15.557	15.8537	15.7965	15.7932	15.7824	15.9094
LIPT2	E1BI46	4	13.4444	12.9065	13.9713	13.5455	13.9771	14.1498	13.772	13.9013
SAT2	A0AAF6YM68;Q7PCJ8	4	15.6245	15.4223	15.1479	15.4851	15.725	15.6943	15.3997	15.4572
GTF2E2	F1MUX7;Q2KJF9	5	14.483	14.5165	14.5992	14.5762	13.9944	13.9392	14.1041	14.1423
PGAM5	E1BIE7	10	17.1744	17.2903	18.1431	16.9762	17.3813	17.5073	17.7361	17.6374
PRPF4	Q3MHE2;A0AAA9U1D0	20	18.5073	18.1893	18.4514	18.1936	18.317	18.4061	18.3803	18.4443
RAD23B	Q29RK4;A0A3Q1LND7	8	18.4577	18.2436	18.295	18.278	18.4172	18.4188	18.4201	18.3485
RAD23A	A3KMV2;A0AAA9TLL4	6	17.9556	17.9446	18.0051	17.9106	17.9872	17.9693	17.7339	17.9066
CS	Q29RK1;A0A3Q1MQU2	15	19.0457	18.997	19.6977	19.016	19.2764	19.3884	19.5894	19.3252
PHAX	Q3MHI4	8	19.7372	19.77	19.7378	19.7373	19.8006	19.9444	19.7902	19.907
ECHDC1	Q2HJD5	10	16.8082	16.5899	17.0205	16.8527	17.1251	17.2514	16.96	16.9381
DHX35	E1BDN4	4	16.0077	15.955	16.1855	15.6199	15.7435	16.082	16.0035	15.7048
QRICH1	Q0P5J0;A0AAF6Z5T0	10	15.2555	14.979	14.9206	15.1417	15.3646	15.3216	15.0958	15.3957
[truncated: 4,560 more rows]

## Sheet: Volcano plot result
Genes	Uniprot Accession	n_peptides	l2FC	p-value	Significant
IFI44	A0A3Q1M1V5	9	-2.48086	2.6515e-05	down
RIGI	A0AAA9TED6	26	-2.1265	0.000132009	down
PARP14	F1ML90	11	-1.14347	0.000333111	down
LOC107131209	A0AAA9S3H4	26	-1.15341	0.000501764	down
ZNFX1	E1BN24	23	-0.730677	0.00170075	down
OAS1Y	F1MV66	11	-3.46548	8.61925e-07	down
CBR1	Q3SZD7	3	-1.25901	0.00510646	down
STAT2	E1B8Z4	17	-1.2362	8.6571e-09	down
AFM	G3MYZ3;A0AAA9TF38	33	-2.72616	0.00188265	down
CMTR1	A0AAA9S2X0;A2VE39	23	-0.855397	2.19525e-06	down
PML	A0A3Q1M8R6	28	-1.05368	0.00301515	down
IFIT1	F1MM71	17	-6.3055	2.27137e-08	down
ZBP1	F1MQT4	10	-3.10114	9.40151e-06	down
HERC6	F1N7C1	28	-3.38322	4.79379e-07	down
CMPK2	F1N2W6	24	-3.48037	1.14163e-08	down
GTF2B	Q2KIN8;F2Z4J6	12	-1.38869	1.8492e-05	down
PARP9	F6R6Y8	16	-1.09639	3.0525e-06	down
IRF3	Q4JF28	12	-0.950952	9.20423e-06	down
ISG15	O02741	11	-4.99674	1.79207e-06	down
CMBL	F1N2I5	9	-0.631839	0.000907869	down
TRANK1	A0AAA9SEL9	23	-1.91152	8.34779e-05	down
DAXX	F1MGU0	6	-0.58465	4.95851e-05	down
RNF213	A0A3Q1LV49	92	-1.29425	6.62172e-06	down
BPNT1	Q3ZCK3;A0A3Q1MCU7	15	-0.771495	0.000363106	down
IFI16	A0A3Q1MUY5	14	-0.55357	0.000502767	down
IFIT2	F1MQW8	13	-3.52581	9.64466e-05	down
ADAR	F1MUM9	29	-1.26653	1.89361e-05	down
HCLS1	A0AAA9T1U4	10	-0.667091	0.000107746	down
DHRS7	Q24K14	9	-1.37798	0.00699191	down
PTX3	A0AAA9SX10;Q0VCG9	7	-1.33415	0.00070045	down
TDRD7	A6QLE1	14	-0.820322	8.09889e-06	down
IFIT5	Q17QZ9	15	-2.18739	8.56371e-07	down
TREX1	F6QB70;Q9BG99	3	-1.72228	0.00154687	down
PARP10	F1MRP9	11	-1.12467	5.28157e-05	down
MX2	Q9BDI7;F1MZT4	18	-4.90143	5.13507e-06	down
PSMF1	Q3SX30	8	-1.83908	2.10822e-07	down
STAT1	E1BPP7	34	-2.03959	6.48953e-07	down
LGALS3BP	A0AAF6YIM3;A7E3W2	9	-0.925029	0.000196588	down
C1R	A5D9E9;A0AAA9TB31;F1N0N3	19	-1.11835	0.000213306	down
IFI44L	E1BF69	17	-2.28183	9.99999e-05	down
LOC132342100	F1MDI9	9	-1.42784	1.06997e-05	down
IFIT3	Q08E48	18	-5.06123	8.15819e-06	down
UBA7	F6Q4D3	24	-2.75278	5.20862e-06	down
QPRT	A0A3Q1M3Z8;Q3T063	9	-0.588	0.000124188	down
HERC5	A0A3Q1LPN8	6	-2.17917	0.000267463	down
PLEKHA4	E1B7V8	3	-1.54182	0.000328959	down
XAF1	A0AAA9SI78;Q58DH1	5	-2.00312	0.000124582	down
RTP4	A0AAF6DLI7	3	-2.75373	1.03504e-05	down
MX1	P79135	24	-3.41727	8.71061e-06	down
USP18	A0A3Q1MCA9	12	-3.61142	8.17034e-06	down
RNASEL	A5H027	7	-0.907839	0.000377235	down
C1S	A0A3Q1M7Q5;Q0VCX1	11	-1.36855	0.000120498	down
BRN	P39873	2	-0.906897	0.00109319	down
NMI	F1MG80;Q3ZCL3	12	-0.800846	8.3546e-06	down
ISG20	E1BNM5	7	-3.7355	3.34055e-09	down
LOC515676	F1N6D0	5	-7.64872	1.24856e-07	down
CLEC4F	A0AAA9RVQ7	8	-2.25464	0.00328472	down
PYCARD	Q8HXK9;F1MQF6	8	-0.92644	0.000174262	down
IFI35	F6PSX0	7	-0.749974	7.70704e-06	down
SLFN11	E1B9R8	10	-2.54401	0.00259433	down
EIF2AK2	F6Q5B6	20	-1.75385	1.61391e-06	down
VAV3	A0A3Q1M8P4	2	-0.839726	0.000748813	down
DHX58	G3N268	11	-2.23073	6.12456e-07	down
WARS1	P17248	20	-0.955672	0.000249999	down
BRMS1	E1BDA1;Q1LZE0	6	-0.940483	0.00010613	down
DTX3L	E1BH71	10	-0.976577	0.000348043	down
ALDH3B1	Q1JPA0;A0AAF7AI76	7	-1.14528	0.00402902	down
C1QA	Q5E9E3	5	-1.20884	0.00182483	down
RSAD2	Q2HJF9	5	-2.7395	8.83471e-05	down
B2M	P01888	4	-1.3863	4.72064e-06	down
PON1	Q2KIW1	15	-1.54391	0.00745629	down
IRF9	Q58CQ1	7	-2.18028	4.47439e-07	down
IDO1	F1N7C5	4	-3.58228	1.6206e-05	down
PNPT1	A0AAA9T7E7	20	-1.01261	0.000622993	down
IFIH1	A0AAA9SPF3	16	-2.61555	4.7492e-06	down
SP110	E1BAP3	4	-1.1533	5.87451e-06	down
UBE2L6	A0A3Q1LPH4;A5PJC4	4	-1.59936	0.0002459	down
LGALS9	A0A3Q1M9R6;Q3MHZ8	5	-1.24271	0.000104462	down
TIFA	A2VDM0	3	-1.72057	0.00703917	down
EPSTI1	F1MI76	6	-2.47656	4.30427e-06	down
IRF7	G3N3Q5	3	-2.3115	0.000640021	down
PLEK	F1MRZ8	2	-0.859251	0.000360571	down
CGAS	E1BGN7;A0A452DHU2	3	-0.954892	0.00382524	down
BCL2L15	Q0II48;A0AAF6YXP0	2	-1.80088	2.77921e-05	down
CDADC1	G3N203	6	-0.871431	0.00269708	down
SP100	A0AAA9SZI1	2	-2.92487	0.00156617	down
NT5C3A	A0AAA9TWP9	3	-0.588925	0.000314593	down
FCER1G	Q9BDR7	2	-2.28233	0.000404036	down
TEKT3	A6H782;F1MX07	2	-1.97711	2.23344e-05	down
ALDH1A2	G3X6U1	12	1.05635	0.00123249	up
PLOD1	G8JKV7;O77588	16	0.646453	0.000522914	up
CRTAP	E1BJ75	7	1.02194	0.00155194	up
GTF2E2	F1MUX7;Q2KJF9	5	0.498698	9.30749e-05	up
VCAN	P81282	16	1.52582	0.00416703	up
SPARC	A0AAF6Z0I1;P13213	8	1.23553	0.00068841	up
LTBP1	F1N444	5	0.79469	0.00144412	up
P3H1	A0A3Q1N4G7	9	0.989997	0.000533768	up
TRIP6	Q3SX26	15	0.600237	0.000683998	up
TGFB1I1	A0AAF6YJH7;Q3MHZ4	11	0.746685	7.70859e-05	up
SMOC2	F1N126	6	0.942343	0.00342521	up
NAGLU	G3MXZ7	13	0.605232	1.3965e-05	up
TRIO	A0AAA9RWB8	14	0.719991	0.00121654	up
FKBP10	Q2HJ89	15	0.920732	0.00330231	up
PGM2L1	A5PKH8	16	0.516263	0.000268948	up
MAPRE2	Q3SZP2;A0AAF6YR37	5	0.679095	0.00136463	up
ERG	A0AAA9TJT4	3	1.37936	0.00230114	up
FERMT1	A0A3Q1M848	9	0.556265	0.000435805	up
MEIS1	A0A3Q1MSD1	2	0.635782	0.000522332	up
ADIRF	A0A3Q1LUU1	2	1.20819	0.00528571	up
TCF20	A0AAA9TL18	4	0.33274	0.100835	n.s.
TCOF1	E1BHU1	28	0.21806	0.162834	n.s.
UNKL	F1MNI6	3	-0.529442	0.216845	n.s.
DDRGK1	Q1LZB0;A0AAA9SK08	5	-0.197061	0.155295	n.s.
RBM42	A0A3Q1M222;A0AAA9SKY8;Q0P5L0	3	0.13517	0.0691668	n.s.
MYL3	P85100	10	-0.154934	0.591132	n.s.
MTHFD1	A4FUD0	32	-0.208501	0.0910194	n.s.
PSMD4	Q58DA0;A0AAA9S3W4	12	-0.0405421	0.372362	n.s.
RCC2	A6QL85	19	-0.209718	0.0443318	n.s.
MFSD10	Q0P5M9;A0AAA9SER4	2	-0.381297	0.207746	n.s.
GNG2	P63212	2	0.358302	0.287968	n.s.
ZFPL1	Q2YDD3	6	-0.279639	0.0641121	n.s.
EDC4	E1BJH1	31	0.0256033	0.813052	n.s.
TPRN	G3MWU7	8	-0.205811	0.324186	n.s.
PFDN4	Q2TBR6	2	0.114471	0.688665	n.s.
APLP2	F1N226	10	0.138182	0.608602	n.s.
U2SURP	A0AAA9SW45	20	0.0227509	0.814107	n.s.
DKC1	G3X717	16	0.0566497	0.583067	n.s.
ZSWIM8	A7E305;E1BCX3	5	0.132224	0.41426	n.s.
FH	Q148D3	16	-0.0446706	0.852119	n.s.
TLN1	A0AAA9RW41	86	0.342951	0.0776985	n.s.
LOC112446454	A0AAA9SHV4	3	-0.139001	0.522413	n.s.
CBR4	A4IFA7	9	-0.248248	0.378442	n.s.
EFHD2	A5D7A0	8	-0.2462	0.0849401	n.s.
EFHD1	Q17QM6	4	-0.269803	0.25454	n.s.
ARID1A	A0A3Q1M2B9	23	0.134902	0.156222	n.s.
BLOC1S4	Q0VCC3	4	-0.237975	0.245999	n.s.
GYS1	A0AAA9RZE5;A7MB78	19	-0.182704	0.182083	n.s.
TRAPPC11	A6QLC7;A0AAA9RYM0	19	0.0505092	0.563246	n.s.
ACAD10	E1BGS2	26	-0.344125	0.130422	n.s.
TTC5	F6QA20;Q0P5H9	12	0.057075	0.331382	n.s.
STIP1	A0A3Q1MJH4;A0A3Q1LW78;Q3ZBZ8	24	-0.101281	0.0809788	n.s.
MSL1	A0A3Q1N7Z0	2	0.553315	0.187454	n.s.
UNC119B	E1BIZ3	4	0.452909	0.00519785	n.s.
RFC1	A0A3Q1N5S1	14	0.135866	0.2427	n.s.
ANK3	A0AAA9RXF1	41	-0.102664	0.300264	n.s.
NUMA1	F1N7I5	98	0.123109	0.2958	n.s.
CTNND1	A0A3Q1M1Q5	35	0.0318532	0.851907	n.s.
GADD45GIP1	A1A4P4;A0A452DIN1	4	0.442168	0.264927	n.s.
RBM39	A0A3Q1LWZ4	11	0.0757537	0.281324	n.s.
SEC16A	F1N6K7	37	0.0310874	0.702107	n.s.
TF	A0AAA9U1B9;Q29443	46	-0.443547	0.213582	n.s.
LAP3	P00727	27	-0.178079	0.29977	n.s.
TRIM25	A6QLA8	26	-0.416372	3.38161e-05	n.s.
MTMR14	A0AAA9T6E4	3	0.00161052	0.989346	n.s.
COPB1	A0JN39	41	0.127292	0.00847543	n.s.
ITIH4	F1MMD7;Q3T052	30	-0.834735	0.0217239	n.s.
SEPTIN11	A2VE99;A0A3Q1MUN6	9	0.328882	0.0467786	n.s.
PKP4	A0AAA9SJ44	19	-0.200729	0.381806	n.s.
TTC4	A0A3Q1MJG1;Q5EA11	6	-0.319872	0.00655946	n.s.
MECP2	A0AAA9TXS8	24	0.146637	0.282015	n.s.
RAB3GAP2	A0AAA9T768	19	0.0177894	0.81014	n.s.
IRF2BP2	G3MXD0	9	0.0417426	0.674685	n.s.
SYNE2	F1MF78	232	-0.158838	0.321495	n.s.
MARCKSL1	Q0VBZ9;A0AAF6ZP66	2	0.107228	0.621377	n.s.
BAG3	F1MIU2	23	0.289297	0.0261311	n.s.
PPOX	P56602	12	-0.130835	0.646859	n.s.
NDUFV2	P04394;A0AAA9SEY3;A0AAA9TZL3	8	-0.232399	0.470573	n.s.
PFKL	A1A4J1	21	0.299844	0.0816995	n.s.
DCP1B	Q3SZL6;F1MLY3	8	0.302027	0.0653673	n.s.
CD248	E1BC38	5	0.32364	0.102764	n.s.
NOS1	A0A3Q1MAN5	26	-0.227818	0.54601	n.s.
FBLIM1	A0AAF6Z5Y5;Q1JQB5	9	0.716394	0.00320737	n.s.
DIP2B	F1MLE1	24	-0.0269635	0.7675	n.s.
MTHFD1L	A0AAF6ZL73;Q0VCR7	21	-0.168217	0.610827	n.s.
HDLBP	A0A3Q1NND0	37	0.405074	0.00457702	n.s.
NEK7	A0AAA9SNU1	10	0.205114	0.143338	n.s.
LCP1	F1MYX5	26	-0.372944	0.000487858	n.s.
GLOD4	A0AAF6DM94	12	-0.123124	0.179268	n.s.
GYG2	A0AAA9T701	6	-0.428685	0.105383	n.s.
UBE3A	A4IFN7	23	0.139529	0.154711	n.s.
DAGLB	F6RA94	6	-1.06556	0.0850766	n.s.
RNF169	J9JH84;F1MRW8	4	-0.573583	0.270342	n.s.
TPM3	Q5KR47	2	-0.136421	0.424077	n.s.
PACSIN2	Q1RMR9	15	-0.140307	0.288517	n.s.
RBBP6	A0AAA9RXX2	12	-0.140181	0.0686407	n.s.
PRKCD	F1MZX0	17	-0.318532	0.0191847	n.s.
HDHD2	Q3ZCH9	9	0.287034	0.0333051	n.s.
CSE1L	F1MWN1;A5D785	36	0.0827188	0.161747	n.s.
MAGI3	E1BM96	9	-0.0663602	0.783628	n.s.
TTR	O46375	5	-0.638076	0.054276	n.s.
CDC73	E1BPQ8	18	-0.0484467	0.234761	n.s.
DUSP3	A7YY43	6	-0.111485	0.0833981	n.s.
VDAC3	A0A452DIJ5;Q9MZ13;A0A3Q1M0L2	10	-0.170297	0.589292	n.s.
SERPIND1	F6R4P6	18	-0.226217	0.466189	n.s.
EIF2B5	E1BPB3	10	-0.0292101	0.722393	n.s.
PRPF3	F2Z4C4;Q2KIA6	13	0.103239	0.247056	n.s.
MIA3	Q0VC16;A0A3Q1M2R2	18	0.0752976	0.533421	n.s.
CAND1	A7MBJ5	41	-0.0457458	0.596759	n.s.
F5	F1N0I3;Q28107	12	-0.219543	0.341243	n.s.
ATP2C1	P57709	7	-0.290927	0.336912	n.s.
TP53BP1	E1BDS6	34	0.0204597	0.825903	n.s.
RCN1	G3N2L2	15	0.0626483	0.77766	n.s.
SRPK2	A0A3Q1NBC4	10	-0.00080204	0.995419	n.s.
AP2A1	A0A3Q1LVF9	28	0.114628	0.185636	n.s.
BCAT2	Q5EA40;A0AAF7ADA8	8	-0.27475	0.0966685	n.s.
PPP1R12C	A0A3Q1LWP2	11	0.172286	0.184387	n.s.
TBC1D4	A0AAA9SG49	30	0.0876205	0.630704	n.s.
YBX1	A0AAF6Z3R0;P67808	6	-0.00297832	0.984575	n.s.
DST	A0AAA9S4P4	26	0.625297	0.00153626	n.s.
TTC38	A0A3Q1M6S8	22	-0.0624332	0.695399	n.s.
BOD1L1	A0AAA9T5M5;F1N2T2	24	-0.125207	0.038822	n.s.
TOE1	Q17QN2	9	0.180502	0.245199	n.s.
AP3M1	F2Z4I2;Q24K11	9	0.00384665	0.95908	n.s.
MOCOS	Q9N0E7	19	-0.28833	0.161046	n.s.
TMEM102	Q1LZD1	3	-0.0467854	0.767261	n.s.
KIAA1671	E1BC55	27	0.0576541	0.880639	n.s.
EPS8	A0A3Q1M2P8	32	0.109427	0.577961	n.s.
ADK	A0AAA9TAD8	15	-0.210814	0.0215078	n.s.
TMEM231	A7MB75	4	0.0225649	0.942999	n.s.
CROCC	E1BBS9	29	-0.045192	0.728538	n.s.
ENPP1	F1MNS5	29	-0.544693	0.143593	n.s.
DHX9	Q28141;A0AAF6Z733	48	-0.00247145	0.97158	n.s.
PM20D2	G3X6X9	7	-0.0326889	0.892594	n.s.
PTMA	A0AAF6YK23;P01252	5	0.107618	0.278988	n.s.
NCKAP1	F1MPZ9	35	-0.0737104	0.395165	n.s.
APBA1	F1MYC3	5	-0.130597	0.693349	n.s.
WDR70	A0A3Q1LXS9;Q32LB0	12	0.013413	0.901081	n.s.
PCCA	A0A3Q1LYL5	33	-0.421103	0.123049	n.s.
TAGLN	Q9TS87	17	0.464727	0.167485	n.s.
CLASP1	E1BGU2	20	-0.0100665	0.90173	n.s.
PRKDC	E1BLB6	25	0.400086	0.0203417	n.s.
PTMS	A0A3Q1MEU1;P08814	4	0.0544314	0.89467	n.s.
ANK2	A0AAA9T728	17	0.443848	0.0484808	n.s.
NXT2	A6QNX3	3	-0.10456	0.506355	n.s.
AKAP9	A0A3Q1MK49	101	-0.297055	0.0553365	n.s.
HNRNPUL2	E1BNQ9	29	0.0215273	0.778604	n.s.
ACACA	A0A3Q1N1M4;Q9TTS3;A0A3Q1NJE5	49	0.180326	0.477852	n.s.
SVIL	A0AAA9SUN6;O46385	27	0.086854	0.312695	n.s.
TNS3	A0A3Q1NEL1	27	0.212806	0.0639063	n.s.
TGFBR3	A0A3Q1M0W4	16	-0.0480552	0.739056	n.s.
TMED8	E1BNI6	9	-0.305782	0.123735	n.s.
RELCH	A0A3Q1M6S1	24	-0.141795	0.264947	n.s.
IFT140	E1B860	20	0.0260832	0.759188	n.s.
PIK3CB	F1MYM3	10	-0.0298207	0.849161	n.s.
XAB2	A0AAF6DMF4	20	0.0466328	0.58262	n.s.
DNAJC17	Q2KI83	9	-0.0631588	0.523294	n.s.
PFDN2	A0AAF6Z7N5;A1A4P5	6	-0.0350471	0.666513	n.s.
SKIC3	A0A3Q1M8Y4	41	0.188456	0.0450876	n.s.
PRPF6	A0AAA9S435;Q2KJJ0	30	0.0975652	0.31321	n.s.
LRRC1	A0A3Q1LTV0	11	-0.109652	0.398829	n.s.
PHB1	Q3T165;A0AAA9SMG6	16	-0.055078	0.863682	n.s.
PCID2	A0A3Q1MVQ2;Q2TBN6	15	-0.0729868	0.344521	n.s.
MSTO1	A5D9D4	6	0.00713348	0.959968	n.s.
SCLY	A2VDS1;A0AAF6YVB5	14	-0.278619	0.025585	n.s.
SYVN1	E1BAK9	3	-0.238424	0.368816	n.s.
ECI2	A0AAA9TZC7	17	-0.354981	0.0663666	n.s.
SLC7A6OS	Q1JQE2	3	-0.0515108	0.709543	n.s.
ZC3H4	A0AAA9SY77	13	0.0697694	0.351859	n.s.
SUPV3L1	A0AAF6DLT1	13	-0.221832	0.333067	n.s.
KMT2D	A0A3Q1LM54	6	0.0980701	0.586876	n.s.
NEMF	A0A3Q1MSI2	10	-0.0110776	0.718618	n.s.
ACSS3	A7MB45	18	-0.475846	0.077815	n.s.
FKBP4	Q9TRY0;F1MU79	33	-0.123146	0.308586	n.s.
FAM98B	A0AAA9T5P2	13	0.065268	0.654607	n.s.
RC3H1	A0A3Q1M2R1	3	0.0951178	0.453745	n.s.
OXCT1	Q24JZ7	18	0.0660419	0.763679	n.s.
DYNC2H1	A0AAA9TWT4	72	0.0869327	0.337516	n.s.
TEPSIN	A0A3Q1MCN3	5	0.0849788	0.656608	n.s.
GALNT12	A0A3Q1N2Q7	4	-0.160369	0.439665	n.s.
SARM1	E1BIR9	9	0.48423	0.0835404	n.s.
NECAP2	A0A452DJD5;Q5E9Q4	7	0.0760622	0.52528	n.s.
FLII	F1N365	36	-0.214063	0.0546236	n.s.
COL6A1	E1BI98	29	0.494561	0.106417	n.s.
CEBPB	A0AAA9TD00;O02755	7	-0.287313	0.427628	n.s.
AQR	A0A3Q1MP16	33	0.177745	0.0346966	n.s.
YWHAE	P62261	17	-0.22899	0.062862	n.s.
LMAN1	A0A3Q1MSA1	9	-0.249961	0.215186	n.s.
SRRM2	A0A3Q1M0D6	26	-0.0172286	0.428945	n.s.
SDHA	P31039;G3MY67	23	-0.156295	0.521922	n.s.
DPYD	F1N549;Q28007	22	0.302877	0.183953	n.s.
ITIH5	F1N1Z6;A2VE29	14	0.599968	0.048217	n.s.
NUP133	F1MM55	23	0.118259	0.293033	n.s.
GOLGB1	A0AAA9SMB5	59	-0.136441	0.291298	n.s.
HDHD5	F1N6K5	8	-0.369802	0.117534	n.s.
UGGT1	A0AAA9TE87	39	0.0814352	0.268465	n.s.
ALDH2	P20000	19	-0.45646	0.0875321	n.s.
COMMD3	F1MUK6;Q3SZ76	9	0.190884	0.0289303	n.s.
CHCHD4	Q2KHZ4	3	0.0268106	0.895248	n.s.
ACSF3	Q58DN7;A0AAF7AST6	17	-0.29068	0.167237	n.s.
SRM	E1BM12	11	0.0493727	0.851284	n.s.
ITGA3	F1MMS9;A0A452DIV7	14	-0.16173	0.468573	n.s.
SMARCD2	A0AAA9RZX6;E1BJD1	11	0.135264	0.0719395	n.s.
CNP	P06623	14	-0.409804	0.00438451	n.s.
NHSL3	A0A3Q1MXQ4	10	-0.202935	0.261606	n.s.
TERF2	F1MMS4	11	0.242765	0.0979843	n.s.
RIDA	Q3T114	7	-0.459874	0.00145405	n.s.
DERA	Q3T0V9	12	-0.089026	0.282886	n.s.
SUN1	A0AAA9U142	14	-0.260539	0.252355	n.s.
STK4	Q5E9L6;A0A3Q1MLJ1	12	-0.194232	0.075863	n.s.
KTN1	A0A3Q1LVS2	62	-0.201374	0.0964473	n.s.
SHPK	A0A3S5ZPP1	13	-0.232691	0.202224	n.s.
GART	Q59A32	31	-0.0655565	0.528022	n.s.
GOLPH3	Q1RMW9;A0AAA9S7T6	8	-0.0221584	0.781678	n.s.
PGM5	A6QNJ7	27	0.137301	0.435251	n.s.
INF2	A0AAA9SIE1	19	0.331277	0.0959721	n.s.
SF3B1	F1MX61	43	0.151575	0.0649601	n.s.
ALG3	F6QW25	2	-0.0909014	0.772516	n.s.
COL15A1	A0A3Q1MUA3	16	0.633781	0.0258906	n.s.
ERC1	A0A3Q1LTK7	19	0.228413	0.156363	n.s.
TARS2	A0AAA9S7D5	8	-0.0732667	0.633236	n.s.
MAST4	E1BH93	5	-0.183423	0.519943	n.s.
MAP4	A0A3Q1M9W4;P36225	35	0.129339	0.260092	n.s.
MACROD1	Q2KHU5	7	-0.317297	0.0296208	n.s.
OPA1	A0AAA9S306	33	-0.0889525	0.692762	n.s.
FLNB	A0A3Q1MQ34	103	0.156533	0.112416	n.s.
CNOT3	E1BCS1	8	-0.0679767	0.373623	n.s.
MRPL2	Q2TA12	4	0.0850396	0.841638	n.s.
JAGN1	Q2NKY9	3	-0.315259	0.209837	n.s.
UBXN6	Q2KIJ6;F1MES6	13	0.122272	0.338709	n.s.
MICU1	Q0IIL1	7	-0.00614905	0.969193	n.s.
KPNB1	E1BFV0	31	-0.00800276	0.88945	n.s.
HSPG2	A0AAA9TDR0	102	0.797734	0.07476	n.s.
RUVBL2	F1MSD2;Q2TBU9	20	-0.0809441	0.225231	n.s.
TMEM43	A0AAA9S182	16	-0.239838	0.29128	n.s.
TXNDC15	A0AAA9TYR8	3	-0.183532	0.335571	n.s.
PRRC2B	A0A3Q1LY98	4	-0.13144	0.385122	n.s.
IPO4	A0A3Q1N3C7	28	0.184025	0.108124	n.s.
RARS1	A7YW98	35	-0.0268021	0.284134	n.s.
MYO1B	A0A3Q1MR81	27	-0.107644	0.384243	n.s.
PA2G4	Q3ZBH5	19	-0.187323	0.00612437	n.s.
RAF1	A7E3S4	5	0.237325	0.0167016	n.s.
STXBP1	P61763;A0AAA9TPJ7	23	0.065444	0.588665	n.s.
STXBP2	F1MHC2	19	-0.167678	0.257009	n.s.
SMU1	A0AAF6Z1S7;Q2TBS9	14	-0.0122333	0.870845	n.s.
CIC	G3MX46	11	0.0595188	0.754909	n.s.
TNS2	A0A3Q1MBB1	29	0.153111	0.351655	n.s.
FUS	A0A140T861;Q28009	7	0.170828	0.0036315	n.s.
ATP11C	A0A3Q1LWW8;A0AAA9RSX8	2	-0.138702	0.548108	n.s.
FOCAD	A0AAA9TVP1	21	0.152264	0.108566	n.s.
PIGG	A0AAF6DLK5	6	0.0117741	0.969372	n.s.
HEATR1	F1MDU9	28	-0.00501895	0.96843	n.s.
NPEPL1	A0AAF6DME4	15	0.0164256	0.869386	n.s.
TDRKH	F1MUI1	4	0.0700874	0.696929	n.s.
EIF4G3	A0A3Q1M1I5	20	0.217916	0.149136	n.s.
PRMT5	A0AAA9TZG3;A7YW45	14	0.0132694	0.836009	n.s.
TTC39B	A0AAA9S0I4	8	-0.0187192	0.953217	n.s.
NPRL3	F1MMI3	3	-0.0194287	0.857462	n.s.
MIEF1	E1BIT2	5	-0.255118	0.671129	n.s.
CYP27A1	F6QQE8	21	-0.464317	0.0641159	n.s.
EXOC3	Q0V8C2	15	0.136359	0.00394861	n.s.
ITIH1	Q0VCM5;A0A3Q1LVM5	30	-0.635017	0.201133	n.s.
FYCO1	A0A3Q1M133	29	0.0510383	0.72666	n.s.
VPS35L	A0AAA9TRE2	30	0.0955148	0.121009	n.s.
RAB24	F6Q1G9	9	-0.317624	0.354807	n.s.
TTLL12	Q08E58	22	0.000433922	0.995833	n.s.
FARP1	F1MFC6	28	0.0084815	0.91565	n.s.
INTS14	Q5EA76	2	-0.309833	0.588016	n.s.
DPYSL3	A7MBI5	29	0.522393	0.00906595	n.s.
DPYSL2	O02675	20	0.297214	0.0281787	n.s.
DPYS	A0AAA9SBH6	3	-0.444844	0.340676	n.s.
PLEC	E1BF59	207	-0.13068	0.303416	n.s.
CLEC11A	A5D7L1	2	-0.0728445	0.782753	n.s.
SHANK3	G3X7B4	2	0.13094	0.333304	n.s.
BAZ2A	A0AAA9SS13	4	0.0784245	0.841601	n.s.
NAPA	P81125;F6Q334	17	-0.0644832	0.335408	n.s.
ARHGAP17	F1N458	14	0.00926208	0.89523	n.s.
HPGD	Q3T0C2;Q309F3	11	0.453926	0.0975477	n.s.
NATD1	A6QL79	2	0.657023	0.409237	n.s.
H6PD	A0A3Q1LRN7	20	0.44331	0.000252844	n.s.
QDPR	A0AAF6ZJM9;Q3T0Z7	10	-0.280125	0.0229768	n.s.
DCHS1	E1B969	45	0.474905	0.0212749	n.s.
PHKA1	A0AAA9SIN1	7	0.0693204	0.6212	n.s.
SHMT2	Q3SZ20;A0AAA9TQ60	18	-0.0943699	0.572307	n.s.
ACAP2	A0AAA9TC46	12	0.236093	0.0799588	n.s.
XRN2	F1MKX7	22	-0.186011	0.0537901	n.s.
KRT19	A0AAF6YMV1;P08728	16	0.0992942	0.695571	n.s.
SAMD4B	E1B893	5	-0.0897212	0.585363	n.s.
SNRNP200	E1BH78	84	0.0599766	0.442768	n.s.
PRXL2A	Q3ZBK2	11	1.05582	0.016096	n.s.
SFSWAP	A0A3Q1LYZ4	9	-0.245886	0.0211454	n.s.
EPPK1	A0A3Q1LMV9	67	0.231215	0.209472	n.s.
PI4KA	A0A140T888;O02811	34	0.182798	0.200224	n.s.
C8A	F1MX87	18	-0.218129	0.372713	n.s.
RARRES1	Q0P5D6	2	0.595083	0.209736	n.s.
ZNF706	A0A3Q1MFB7	2	-0.149991	0.150547	n.s.
ELAC2	E1BDK7	18	0.346943	0.0646899	n.s.
UAP1L1	A0AAA9SCV4	17	-0.296839	0.0124536	n.s.
RBM33	E1BNF0	3	0.0164537	0.899327	n.s.
SPTAN1	A0AAA9TJI4	132	0.161403	0.217193	n.s.
NOL11	Q3MHH2;A0AAF6Z211	7	0.0954871	0.605461	n.s.
FHOD1	G3MYQ1	14	0.312883	0.0274235	n.s.
EPRS1	A0AAA9TMZ2	56	0.14706	0.0593935	n.s.
WWC1	F1N3I6	4	0.000995874	0.994389	n.s.
CDK13	E1BB52	3	-0.027509	0.870363	n.s.
TOR1AIP1	F1N4E5	17	-0.130201	0.326646	n.s.
ALDH16A1	A0AAA9TSB3;A6QR56	13	-0.0767679	0.431681	n.s.
PPP2R5B	Q08DP7	6	-0.278008	0.138659	n.s.
HNRNPLL	F1N7G0	16	-0.00876284	0.902372	n.s.
POLR1A	E1BIX2	9	0.0618925	0.707498	n.s.
RHPN2	A4FUC9	25	0.0689025	0.687566	n.s.
AMPH	A0A3Q1MHL4	8	0.283957	0.446428	n.s.
EML4	A0A3Q1LLV8	29	0.159579	0.255905	n.s.
HUWE1	E1BNY9	75	0.243836	0.0115671	n.s.
HTT	E1B8E7	38	0.0949421	0.044725	n.s.
PTPN23	E1BIU7	33	0.0738723	0.380581	n.s.
KIF2A	Q2NL05;G3N277	15	-0.0541875	0.702854	n.s.
NUDT2	Q29RJ1;A0AAF6ZFU3	4	0.182693	0.321084	n.s.
RPS25	A0A3Q1MTI8;A0AAF6ZQK7;A0A0A0MPA4;Q56JX5;A0A3Q1MT40	4	-0.232078	0.0627183	n.s.
PAK4	A0AAF6DLY7	8	-0.0960603	0.466157	n.s.
AKAP13	A0A3Q1MRE3	41	0.0985606	0.421186	n.s.
TRMT5	Q3MHN8	12	0.0650077	0.116031	n.s.
FOXO3	F1N4K5	3	0.309636	0.0898519	n.s.
DIMT1	Q2KHT8;A0AAA9SKX4	11	-0.00594068	0.979731	n.s.
EIF4G1	F1MX04	33	-0.0613422	0.320138	n.s.
LRP1	E1BGJ0	45	0.346729	0.173457	n.s.
XPO7	G3N1J2	29	0.0440569	0.590857	n.s.
GIGYF2	A0AAA9SKH3	12	0.171131	0.284124	n.s.
UBE2O	F1N3I3	21	-0.141014	0.124582	n.s.
TTC39A	F1MNU0	7	-0.0942068	0.298148	n.s.
ISCA1	Q3SZG8	3	-0.0847435	0.440079	n.s.
ME1	A0A3Q1MWC7	16	-0.120812	0.176639	n.s.
GPI	Q3ZBD7;A0A3Q1MP70	19	-0.019412	0.845183	n.s.
TUBB6	Q2HJ81;A0AAF6ZEV9	6	0.00446177	0.929939	n.s.
CCDC85C	F1MZJ7	2	-0.52748	0.206861	n.s.
SLC25A27	E1BME0	7	-0.261671	0.477234	n.s.
IMMT	A0A3Q1MFE4	33	-0.100841	0.794944	n.s.
AMT	A0AAA9TRT8;P25285	5	-0.421313	0.102455	n.s.
PLCL2	E1BH60	4	0.132117	0.620702	n.s.
FADD	Q645M6	4	0.0324283	0.839567	n.s.
CTNNB1	Q0VCX4;A0AAF6Z2K7	23	-0.0871553	0.571706	n.s.
ICMT	G3N1V4	2	0.235814	0.446037	n.s.
PGM2	F6QEU6	26	-0.186003	0.137145	n.s.
TRMT2A	E1BMX2	17	-0.0159059	0.819658	n.s.
JUP	Q8SPJ1	22	-0.0602727	0.524183	n.s.
MYLK	Q28824;A0AAA9SS38	26	0.611825	0.187234	n.s.
HSPA12B	A0A3Q1MFK9	20	0.460563	0.0202771	n.s.
RASEF	A0A3Q1M0B9	3	0.0575545	0.912539	n.s.
RAI14	A0AAA9STV0	33	0.150512	0.312151	n.s.
NIPBL	E1BKC4	31	0.193102	0.0138478	n.s.
ABCF1	A0A3Q1NB13	20	0.00282907	0.977429	n.s.
VCL	A0A3Q1LIB4	48	0.294122	0.0800519	n.s.
CAMK4	A0A3Q1M5T5	8	0.189212	0.0698244	n.s.
PSMA2	Q3T0Y5;A0A3Q1LX83	10	0.0563173	0.464951	n.s.
YES1	F6S1J8	5	0.233814	0.175482	n.s.
FBXO22	A5PJX0	9	-0.144458	0.276576	n.s.
ATP23	F1MY08	2	-0.726401	0.0851675	n.s.
ESR1	P49884	9	0.459793	0.0238231	n.s.
WIPI2	Q2KJ60	7	-0.178964	0.0290232	n.s.
CYC1	P00125	6	0.0841689	0.862661	n.s.
THUMPD3	Q2T9W2;F1N027	10	-0.0384414	0.729969	n.s.
RAB3GAP1	A0A3Q1MFP2	24	0.00618935	0.927357	n.s.
HYOU1	A0A3Q1MBP1	33	-0.0152731	0.880002	n.s.
SMG8	A1A4J7;F1MZ61	6	-0.336743	0.0508027	n.s.
PGR	F1N712	15	0.316176	0.26524	n.s.
GAMT	Q2TBQ3	7	0.172498	0.106376	n.s.
ZNF622	F1N194	8	-0.233493	0.137077	n.s.
ACIN1	F6QIB4	13	-0.0826178	0.403055	n.s.
RUSF1	G3N1G1	9	-0.359605	0.042837	n.s.
TRAF3IP2	A0AAA9TJ12	9	-0.128053	0.632544	n.s.
FUNDC1	F1N5S9	2	-0.225834	0.24424	n.s.
GCDH	A0AAF6ZG02;Q2KHZ9	7	-0.184072	0.258591	n.s.
PPA1	P37980	13	-0.487831	0.0124868	n.s.
REPS2	A0AAA9S5X6	3	0.231615	0.234231	n.s.
NONO	Q2KJ42;A0A3Q1LXP0	17	0.213208	0.13319	n.s.
RMDN3	A0AAF6YKI7;Q1JQC5	11	-0.193187	0.245309	n.s.
METTL1	A0AAF6Z3Q7;Q2YDF1	4	-0.0762343	0.404304	n.s.
PYGL	Q0VCM4	37	-0.151742	0.527874	n.s.
SARS1	Q9GMB8	25	-0.244224	0.0591395	n.s.
PDK3	A0A3Q1MR25	12	-0.325207	0.0799453	n.s.
ZNF592	F1N5U2	9	-0.0725002	0.636664	n.s.
RFLNB	F1MEL7	3	0.209672	0.711746	n.s.
CHCHD10	A4IF72	2	0.183772	0.626745	n.s.
NUP155	A0A3Q1M9F3	36	0.0572639	0.589991	n.s.
CHCHD9	Q3ZCI0	4	0.132363	0.500677	n.s.
SPON1	Q9GLX9	17	0.185716	0.438644	n.s.
CHMP4C	F6RDN5	4	0.103551	0.438614	n.s.
PYM1	A6QPH1;A0AAA9SNG8	6	0.0461607	0.231588	n.s.
TKFC	A0JN77;Q58DK4	16	0.0873117	0.484215	n.s.
SMN1	A0AAA9RZF6;O18870	5	0.138388	0.51682	n.s.
ATG4B	A0AAA9TG97;Q6PZ03	7	0.0368373	0.772101	n.s.
NRCAM	A0A3Q1M3L7	17	-0.167558	0.719139	n.s.
PHF23	A5D962	5	-0.198999	0.162251	n.s.
RHOD	F1N7C7	2	-0.486731	0.230775	n.s.
FBLN1	A0A3Q1MJB2	22	0.382157	0.0489113	n.s.
NFIC	A0A3Q1M3P9	8	0.181401	0.2322	n.s.
NUP107	E1BDU0	25	0.122728	0.31635	n.s.
NUS1	A0A3Q1MAW4	3	0.161884	0.751747	n.s.
UROD	A0AAA9RWR1	9	-0.233938	0.0172208	n.s.
TRA2B	Q3ZBT6	7	-0.1218	0.344861	n.s.
LYAR	A0AAA9RX06	6	0.0535564	0.805302	n.s.
GIT2	A0AAA9S5N2	9	0.19492	0.0272276	n.s.
ILVBL	A6QQT9;A0AAF7APW4	14	-0.571743	0.144009	n.s.
NUP214	F1MH31	38	0.0687506	0.490972	n.s.
NFYC	A0AAF6ZUW3;Q5E9X1	3	0.125252	0.476734	n.s.
ETFDH	A0A452DIQ6;Q2KIG0	22	-0.322984	0.277357	n.s.
CAT	P00432	12	0.056622	0.639496	n.s.
DHTKD1	E1BFI2	17	-0.507026	0.0692113	n.s.
DICER1	F1MCQ5;Q6TUI4	6	-0.118992	0.418676	n.s.
HSPBP1	Q2KJ77	11	-0.0375628	0.468827	n.s.
OSBPL3	F1MLJ5	17	0.237398	0.403146	n.s.
REPS1	F6Q4T4	15	-0.0908663	0.416808	n.s.
MGAM	A0A3Q1M6D9	33	-0.67944	0.3436	n.s.
LAMB1	F1MNT4	28	0.660623	0.0237798	n.s.
SHTN1	A0A3Q1MCX8	30	-0.269932	0.0105718	n.s.
ZNF428	E1BJ55	4	0.284879	0.0761835	n.s.
THOC6	A0A3Q1MZJ3	12	-0.00818419	0.892026	n.s.
ADARB1	F1N0T4	4	0.309573	0.161746	n.s.
PGLYRP1	Q8SPP7	5	-0.428798	0.00839236	n.s.
VPS53	A0AAA9SLW2	11	0.0770476	0.28238	n.s.
NDUFS8	P42028;A0A452DIK3	4	0.131875	0.644082	n.s.
FRYL	A0AAA9TZL4	16	-0.0246708	0.684178	n.s.
CCDC50	A0A3Q1MBX8	7	0.205053	0.155359	n.s.
RNPEP	G3X743	19	-0.39968	0.00620259	n.s.
A2M	Q7SIH1	71	-0.673159	0.0832109	n.s.
PEX11B	Q148K5;A0AAF6YS65	7	-0.194676	0.519328	n.s.
TBCD	A0AAA9SWC2;Q28205	31	-0.153775	0.0298334	n.s.
MACROH2A1	A0AAA9T2Q5	11	-0.172865	0.328492	n.s.
ACOT7	A0A3Q1N7U4	8	0.0761516	0.848624	n.s.
NOSIP	Q3SWY5	7	-0.0897145	0.328784	n.s.
ARHGEF7	A0A3Q1M3G8	15	0.039391	0.513732	n.s.
SPTBN2	A0AAA9TB55	28	-0.308424	0.23614	n.s.
PRKAR2B	F6Q9S4;P31322	13	-0.103852	0.421584	n.s.
PRKAR2A	A0AAF6YZS2;P00515	15	-0.0373998	0.683729	n.s.
TNS1	Q9GLM4	51	0.374915	0.0720883	n.s.
CHAMP1	A0AAA9SEB0	13	0.211333	0.0495606	n.s.
ANXA4	A0AAF6YHR8;P13214	20	-0.0261831	0.857098	n.s.
ACSF2	Q17QJ1	17	-0.147442	0.715042	n.s.
AKR7A2	F1MZC0;A0AAA9S338;A0AAA9SP77	14	-0.203612	0.00810178	n.s.
SUN2	F6PTU3	22	-0.0541406	0.861174	n.s.
EIF4B	F1MYS7	10	0.0889187	0.205466	n.s.
ADSL	F1MHP6;A3KN12	19	0.185394	0.118611	n.s.
SUPT16H	E1BNP8	29	0.0298362	0.660376	n.s.
SEL1L3	A0A3Q1MHD8	5	0.351833	0.248724	n.s.
UBXN4	Q3ZBU9	7	0.220569	0.399642	n.s.
MB21D2	E1B9A3	5	-0.294663	0.0798461	n.s.
CCDC22	Q1RMI8	18	0.0526409	0.474095	n.s.
TOP2B	A0AAA9T1Q6	45	-0.0280204	0.704082	n.s.
MMRN2	E1BJW3	9	0.445983	0.0325889	n.s.
MNAT1	Q3SX39	4	0.34683	0.170702	n.s.
FNDC1	E1BI51	21	-0.0600216	0.852939	n.s.
GCN1	A0AAA9SA20	85	-0.0247636	0.53608	n.s.
SEL1L	F1MGJ5	12	0.117258	0.693312	n.s.
EML3	F6RJ80	18	0.0618238	0.512798	n.s.
GOLGA5	F6RNZ4	21	-0.296887	0.248265	n.s.
CAPN5	F1MQD1	12	-0.25253	0.293568	n.s.
WASHC2A	F1MTG3	23	-0.0109973	0.880541	n.s.
PKP3	A0A452DJL3;Q08DQ0	26	-0.264546	0.0699581	n.s.
SPTLC1	Q3MHG1	9	0.117754	0.667068	n.s.
PKN2	F1MFK1	22	0.025888	0.28626	n.s.
PKP2	A4IF71	24	-0.0501413	0.384066	n.s.
IDH3B	O77784	11	-0.138749	0.257087	n.s.
NIFK	Q3SZM1;A0AAF6ZAT9	7	0.0884328	0.4943	n.s.
LXN	A0AAA9T613	4	-0.0171428	0.943845	n.s.
DSG2	A0A3Q1MKM2	25	-0.131731	0.412581	n.s.
STRAP	Q5E959	17	0.138779	0.230965	n.s.
TRMT6	A0AAF6YIK1;Q2T9V5	10	-0.065052	0.72556	n.s.
APOB	E1BNR0	57	-0.600049	0.207483	n.s.
MAP1A	A0A3Q1M9Z4	34	0.447406	0.0420207	n.s.
FBXL8	Q08DG4;F1MU23	9	0.00230098	0.983989	n.s.
TMF1	F1MUW6	10	-0.050175	0.626106	n.s.
MICAL1	F1MH07;A0AAF6YSC4	11	0.0946853	0.687929	n.s.
MCCC2	E1BPP6	19	-0.457834	0.0754617	n.s.
COL18A1	F1N6W9	21	0.209655	0.315687	n.s.
SYPL1	A0A3S5ZPC1	3	-0.350841	0.204699	n.s.
EPB41L5	Q58CU2;A0A3Q1LUC0	7	0.199995	0.431742	n.s.
GLE1	Q3ZBK7;A0AAF6Z191	9	0.279476	0.0129461	n.s.
SMC1A	O97593	45	-0.0729175	0.355572	n.s.
APOE	Q03247;A0A3Q1LPF0	14	-0.0452728	0.851475	n.s.
CAAP1	Q2T9W9	3	0.137035	0.424345	n.s.
CCDC71L	A0AAA9TH50	2	-0.163002	0.589677	n.s.
AFAP1L2	Q17R10;A0AAA9SM25	18	-0.125756	0.332052	n.s.
NUCB2	A0AAA9U1W7	15	0.070518	0.429746	n.s.
TACC2	A0A3Q1N9Q2	25	-0.218355	0.10292	n.s.
LSR	F6RR15	7	-0.146544	0.573819	n.s.
GALK2	A0AAA9SZH8	11	-0.101547	0.558886	n.s.
DYNC1H1	E1BDX8	189	0.15929	0.0268743	n.s.
SEC23A	F1MVW5;A2VDL8	20	0.112547	0.314292	n.s.
DDX50	F1MMK3	13	0.104159	0.401523	n.s.
ASRGL1	Q32LE5;A0AAF6YQE1	9	-0.156712	0.264526	n.s.
TGFBI	A0AAF7APH2;P55906	20	-0.35731	0.25851	n.s.
HSD17B4	A0AAA9TEQ9	30	-0.217949	0.41239	n.s.
PCP4	Q148C4	3	-0.855914	0.13696	n.s.
ACAT2	Q17QI3	9	0.0689769	0.615896	n.s.
PPP1R21	A0A3Q1LG54	21	0.172159	0.0761472	n.s.
UBA1	A0AAA9SHQ7;A3KMV5	45	-0.0179558	0.604298	n.s.
NOC2L	A0AAF6Z2P7;Q3SYU1	8	0.228998	0.336513	n.s.
ADH5	Q3ZC42	11	-0.105642	0.319312	n.s.
MRPS30	P82924	6	0.200984	0.529213	n.s.
ETFA	F1MWR3;Q2KJE4	12	-0.403326	0.0377884	n.s.
PGM3	A0A3Q1LUV2	18	-0.115194	0.447463	n.s.
CHD4	F1N3F6	26	0.138615	0.0197954	n.s.
WDR35	A0A3Q1LWP8	15	-0.0715783	0.429552	n.s.
CROCC2	F1MMB4	33	-0.350275	0.232786	n.s.
SEPTIN8	A0A3Q1LN12;Q0VCP4	11	0.0360408	0.761497	n.s.
HSPD1	G3N0R5;P31081	30	-0.176003	0.43001	n.s.
PSMD1	A7MBA2	30	0.0586891	0.364334	n.s.
HAUS7	A0AAA9SKB6	6	0.233446	0.190472	n.s.
EWSR1	A0A3S5ZPJ4	6	0.0265789	0.721386	n.s.
EDC3	E1BEA2	12	0.235022	0.0315686	n.s.
ARFGAP3	Q17R07	19	0.15822	0.0714106	n.s.
CARS1	A4FUC8	35	-0.147389	0.0257193	n.s.
IRF2BPL	F1N3F2	5	-0.210316	0.351085	n.s.
FBXW9	Q2T9T9;F1MD71	9	0.00363135	0.982642	n.s.
ALAD	Q58DK5	18	-0.422606	0.000350982	n.s.
DHDH	A0AAA9TS87;Q148L6	12	0.040277	0.784316	n.s.
SF3B2	F1MC31	21	0.0512028	0.625938	n.s.
PRPF8	A7Z025	74	0.120194	0.197533	n.s.
PRODH	Q148G5;G3N3Y2	20	-0.613641	0.0288822	n.s.
ENAH	F1N214	12	0.190101	0.189312	n.s.
HSPA12A	A0AAA9RXG1	16	0.428858	0.0345743	n.s.
TLN2	F1MQI1	71	0.453031	0.0833641	n.s.
ISG20L2	Q2YDK1	6	-0.0461745	0.80162	n.s.
MED13L	A0AAA9T6T6	3	-0.122572	0.48197	n.s.
MOB3B	Q29RK9	2	0.0206633	0.922004	n.s.
MMUT	Q0III1;Q9GK13	17	-0.289244	0.17469	n.s.
NCOR1	A0AAA9RZH3	13	0.198635	0.088965	n.s.
REEP5	Q29RM3;F1MDM4	8	-0.339039	0.357599	n.s.
PDS5A	E1BKG4	35	-0.0535555	0.530675	n.s.
HBB	P02070	14	0.233904	0.208504	n.s.
TOR1AIP2	A5PKH0	10	-0.150274	0.487175	n.s.
LIG3	F1MQY1	24	0.109097	0.415171	n.s.
C3	Q2UVX4	93	-0.572568	0.202674	n.s.
OPA3	G3MYY7	2	0.458314	0.495696	n.s.
UMPS	P31754;A0AAA9T4P2	15	-0.188361	0.125665	n.s.
ACADM	Q3SZB4	11	-0.419278	0.0011426	n.s.
SRD5A1	A0AAF6Z1H8;A5PJS2	3	0.396133	0.649884	n.s.
WDR47	A0AAA9TQT5	9	-0.354436	0.168044	n.s.
FLOT1	Q08DN8	16	0.00867224	0.958064	n.s.
YKT6	A0AAF6YH77;Q3T000	9	0.01476	0.836446	n.s.
LMNA	F1MYG5	38	0.235303	0.249711	n.s.
ALDH5A1	A0AAA9TXM1	19	-0.0359144	0.9453	n.s.
TPCN2	A0A3Q1MD89	5	-0.00574803	0.987827	n.s.
SLC25A4	A0AAF6YYL2;A0A3Q1ME66;P02722	6	-0.0409002	0.930045	n.s.
RAPH1	A0A3Q1M2Z8	12	-0.276039	0.0238491	n.s.
CHD3	A0A3Q1M3Y2	9	0.357711	0.0364994	n.s.
CCAR2	E1B9H3	19	-0.0297141	0.819714	n.s.
FTO	A5D798	17	-0.0123289	0.927857	n.s.
NMT1	F1MZK0;P31717	11	0.0203042	0.815393	n.s.
CCDC124	Q2TBV6	7	-0.0731721	0.554492	n.s.
CFB	P81187	30	-0.36541	0.30077	n.s.
UBE4B	A0A3Q1MHZ2	23	-0.0125608	0.828199	n.s.
GNB1	P62871	4	0.0898728	0.653807	n.s.
DNAAF5	G3N314	16	0.0654731	0.367418	n.s.
TPK1	Q5E9T4	4	0.0351803	0.837811	n.s.
PGK1	Q3T0P6;A0AAA9SR81	24	-0.139355	0.123896	n.s.
FSCN1	Q3MHK9	23	0.0625672	0.733027	n.s.
UBR4	A0AAA9TU63	74	0.0460777	0.426474	n.s.
VPS35	Q2HJG5	30	-0.025754	0.707859	n.s.
ARHGEF25	F1MWU7	5	0.742193	0.0519029	n.s.
HEATR6	E1BHR5	8	-0.228363	0.150079	n.s.
CRYZL1	A0AAA9RYU5;Q59A28	8	0.0628614	0.540121	n.s.
AKR1B1	P16116;A0A493UA87;A0A3Q1MBL5;A0A3Q1M9Q1;A0AAA9TRD4	25	-0.214996	0.073056	n.s.
ERBB2	A0AAA9SBR4	11	-0.136169	0.284443	n.s.
TBC1D7	Q5E9C4	4	-0.260722	0.160124	n.s.
FNDC3B	F1MPN0	8	0.0786018	0.784847	n.s.
LAMC1	F1MD77	34	0.530406	0.0523666	n.s.
ZMYND11	A0A3Q1LJL9	2	0.598466	0.22201	n.s.
LSS	F1MTJ9;P84466	25	-0.0868664	0.744146	n.s.
NUB1	Q8MJ87;F6QQ96	9	-0.0713565	0.464761	n.s.
CFI	A0A3Q1MIF4	29	-0.648172	0.120678	n.s.
MMS19	E1BP36	24	0.041307	0.569338	n.s.
DFFA	Q0VC37	12	0.047755	0.572388	n.s.
COA7	A0AAA9TD90	4	0.0548019	0.817568	n.s.
ITPR3	Q8WN95;E1BKE7	10	-0.269421	0.371681	n.s.
ALS2	F1MDF3	29	-0.0218213	0.886259	n.s.
FHIP2A	G3X6C8;A0JNG7	12	0.0204213	0.840119	n.s.
ACOT11	A0A3Q1M171	8	-0.123828	0.0825615	n.s.
MAVS	A0AAA9S9F2	6	-0.0853925	0.610742	n.s.
POFUT2	F1MPI4	16	0.0443747	0.712621	n.s.
ARFGEF1	E1BP90;O46382	23	-0.015522	0.797363	n.s.
BIRC6	E1BE13	30	0.167051	0.141566	n.s.
LASP1	Q3B7M5	14	0.166905	0.0263575	n.s.
VARS1	A0AAA9T803	39	-0.0125141	0.874011	n.s.
TRAPPC8	A0A3Q1N5L8	29	-0.00648856	0.910566	n.s.
RBM17	A7MB77;A0A3Q1M2Z2	9	-0.0999792	0.237042	n.s.
NPLOC4	F1N7U2	22	-0.177618	0.00580683	n.s.
TNC	A0A3Q1LKE5	10	0.730475	0.379309	n.s.
ABLIM2	A0A3Q1N513	15	-0.415512	0.00589621	n.s.
GNB2	P11017	4	-0.308623	0.0132079	n.s.
ZFYVE1	E1BPK7	11	0.0915637	0.132405	n.s.
VAT1	F1MUP9	20	-0.203571	0.168447	n.s.
VAT1L	F6RA71	3	0.76275	0.0241876	n.s.
HGS	A0AAF6YHD5;Q0V8S0	13	0.0124028	0.878418	n.s.
C7	Q29RQ1;F1N045	36	-0.357328	0.138129	n.s.
ARRB1	P17870	17	-0.0346587	0.827856	n.s.
SNU13	Q3B8S0	6	-0.0283785	0.801053	n.s.
ARHGEF12	A0A3Q1MN47	19	0.142568	0.221714	n.s.
TPP2	A5PK39;A0A3Q1M996	20	0.173834	0.382585	n.s.
UBA6	F1ME38	32	-0.0413613	0.499648	n.s.
DDX27	A1A4H6;A0AAF6ZIP1	13	0.0768049	0.490548	n.s.
MAP2K6	Q5E9X2	10	0.137834	0.506817	n.s.
MMAA	A6QQI8	9	-0.176814	0.504328	n.s.
ITGB4	A0A3Q1M9I5	52	-0.355517	0.195997	n.s.
IQSEC1	A0A3Q1MCH9	6	0.273713	0.0846328	n.s.
EXT2	A0A3S5ZPA0;O77783	2	0.691114	0.105196	n.s.
CRELD1	A0AAA9SSY0;Q5EA46	7	0.10534	0.757589	n.s.
CTSF	Q0VCU3	5	-0.0280125	0.854747	n.s.
PSMC2	Q5E9F9	19	-0.117759	0.0135053	n.s.
MTOR	E1BFB4	45	0.0196705	0.777277	n.s.
ACTN1	Q3B7N2	33	0.122319	0.583174	n.s.
ACTN4	A5D7D1	38	0.0236945	0.821547	n.s.
SUPT4H1	Q3SYX6	2	-0.118364	0.23848	n.s.
LMNB2	F1MJI7	33	-0.0592771	0.70438	n.s.
IAH1	Q3SZ16;A0AAA9TS64	9	0.226784	0.470589	n.s.
WDR11	A6QLS8	25	-0.0531731	0.436921	n.s.
NUP85	Q3ZC98	14	0.193209	0.0665042	n.s.
ITGA6	A0A3Q1M8K4	26	-0.0817375	0.808308	n.s.
GRWD1	Q1JQD2;A0AAF6YGY8	11	-0.102449	0.345479	n.s.
PELP1	A0A3Q1MDL1	19	-0.184208	0.118103	n.s.
PTPRF	A7MBJ4	37	-0.0528879	0.696636	n.s.
PTPRA	E1BPA0	12	0.132772	0.275852	n.s.
GP2	A0AAA9TCP0	6	-0.53748	0.234812	n.s.
RPA2	A0AAA9TRL7;A0A3Q1MFW6;F6RU89;A0A3Q1MGF7	5	0.257923	0.0517288	n.s.
NELFCD	F1MW69	13	0.121284	0.141501	n.s.
NID1	A6QNS6	26	0.44063	0.058294	n.s.
THBS2	Q95116;A0AAA9S7Y7	4	1.23706	0.1209	n.s.
CFTR	F1MN01;P35071	11	0.0428269	0.882765	n.s.
TRRAP	A0AAA9SVS0	54	-0.0725012	0.436735	n.s.
RPS3A	Q56JV9;G3N262;A0A3Q1N7H0;A0AAA9ST32;A0AAA9RXK0;A0AAA9TAX3	10	0.0911245	0.379733	n.s.
HEATR5B	E1BB26	21	0.0483305	0.513049	n.s.
EGFR	A0A3Q1MHB0	11	-0.0447812	0.82114	n.s.
LTN1	F1MTS8	15	0.00166249	0.984131	n.s.
SHROOM3	A0A3Q1NCP3	13	-0.248289	0.00980868	n.s.
GNL3L	Q3T0J9;A0A3Q1MFA8	8	-0.174384	0.149324	n.s.
SQLE	A5D9A8	6	-0.500382	0.113722	n.s.
ITPRID2	A0A3Q1LNI4	22	-0.154554	0.17543	n.s.
NME9	Q148E9	11	-0.267283	0.13746	n.s.
PLBD2	F1MIH9;Q2KIY5	16	0.13253	0.232572	n.s.
NEPRO	A0AAA9SA39	2	-0.213755	0.29213	n.s.
WFDC2	G3MX65	2	-0.990308	0.0423668	n.s.
NADK	F1MCL6	9	0.040066	0.77892	n.s.
PNP	A0AAA9TPI6;P55859;A0A452DJA8	18	-0.28989	0.0149261	n.s.
SBF1	G5E5Q8	18	-0.0617392	0.336612	n.s.
SBF2	A0A3Q1LVT0	8	0.331869	0.152067	n.s.
KDM2A	F1N735	14	-0.0346665	0.778641	n.s.
CHID1	Q5EAB4	10	-0.129723	0.142168	n.s.
IPO7	E1BGE5	21	0.0221052	0.675972	n.s.
ACTR1B	A4IFE3	8	0.40734	0.108384	n.s.
ACTR1A	F2Z4F0	10	0.050427	0.554966	n.s.
DUSP28	A0A3Q1MH98	6	-0.105505	0.278961	n.s.
JPH1	G5E5B8	3	-0.688731	0.0697239	n.s.
URB1	F1MZA7	20	0.179863	0.227483	n.s.
SGF29	E1BN74	2	0.11884	0.469496	n.s.
ERLIN2	Q1RMU4	12	-0.234354	0.415871	n.s.
DYNC1I2	F1N7H7;Q0III3	18	0.16055	0.00788658	n.s.
ERLIN1	G3N0U8	8	-0.103409	0.673625	n.s.
CASK	A0AAA9TVT5	23	-0.131019	0.228145	n.s.
SPIN1	E1BD88	9	-0.0868185	0.406271	n.s.
CILP2	E1BKL4	10	-0.0315733	0.89567	n.s.
CCDC93	A4IFE0	20	0.0919652	0.381112	n.s.
CXXC1	Q5EA28	6	-0.0123031	0.917087	n.s.
JMJD6	A0A452DJR2;Q58DS6	7	-0.0267634	0.843094	n.s.
RNASEH2A	Q2TBT5	6	-0.100738	0.537646	n.s.
PLRG1	Q2KID6;A0AAF6ZAG7	12	-0.0241849	0.771337	n.s.
MBD1	A0AAA9SCN9	8	0.127273	0.54721	n.s.
HIP1R	A0AAA9SBB5	37	-0.10062	0.688769	n.s.
EYA3	F1MGK4	7	-0.126867	0.5354	n.s.
AHSA1	Q3T0G3	14	-0.0269947	0.632913	n.s.
TUFM	P49410;A0AAF6Z672	22	-0.16909	0.488379	n.s.
AP1G1	A0A3Q1M952	18	-0.0876141	0.0540696	n.s.
AP1G2	F6QYT8	16	-0.0100527	0.957883	n.s.
FBXO6	Q3SX24	7	-0.109582	0.525034	n.s.
RECQL	A0AAA9S5G9	5	0.288478	0.142663	n.s.
SEPTIN5	Q0VC68	12	0.361969	0.0744298	n.s.
TBC1D9B	A0A3Q1LTG9	18	-0.0508404	0.463575	n.s.
SCP2	F1MV74;P07857	22	-0.319438	0.0563375	n.s.
SND1	Q863B3	36	0.145095	0.166758	n.s.
NES	A0AAA9TRB0	43	0.681043	0.00828532	n.s.
SEC14L4	A0A3Q1LYF4	6	-0.583791	0.0128435	n.s.
SAMHD1	Q0VCA5	26	-0.0403051	0.773822	n.s.
ACSM3	F1MES1	9	-0.220705	0.271332	n.s.
LETM1	F1N3R4;Q0VCA3	27	-0.0815549	0.832345	n.s.
DCPS	Q8MJJ7;G5E535	9	-0.0452018	0.59408	n.s.
WBP11	E1BNM6;A0A3Q1MQG9;A0AAA9TF65	14	-0.0176492	0.892371	n.s.
PC	Q29RK2	36	-0.363466	0.0487594	n.s.
CHMP4A	A2VDY3;A0AAA9T8M2	6	-0.203924	0.0841826	n.s.
PITPNB	Q9TR36	12	-0.22596	0.0574384	n.s.
NUTF2	Q32KP9;A0AAF6YPQ4	4	0.0223532	0.802313	n.s.
CUX1	F1N693	24	-0.211671	0.10445	n.s.
INTS1	A0AAA9TV32	24	-0.0388193	0.748028	n.s.
PLXNB2	G3X755	42	-0.113199	0.505269	n.s.
BIN1	E1BNG8	14	-0.0679193	0.404426	n.s.
PHLDB2	A0A3Q1M8W3	12	0.0842493	0.574433	n.s.
ACSL3	F1MEX9	17	-0.254635	0.140857	n.s.
GDPD3	E1BJ80	2	-0.306975	0.31677	n.s.
SMPD4	F1MBU2	23	-0.111814	0.592846	n.s.
COMMD7	Q3MHX1	4	0.0285707	0.806552	n.s.
DAD1	Q5E9C2;A0AAF6Z6H0	4	0.0709162	0.787831	n.s.
FAM76B	A0AAA9SAS8	2	-0.653003	0.262515	n.s.
SERPINB9	F6Q447	9	0.0695696	0.888372	n.s.
SERPINB6	O02739;A0A3Q1MJK1;A0A3Q1NAJ0	7	-0.283568	0.0485892	n.s.
MIOS	E1B899	12	-0.0573196	0.646877	n.s.
DNAH1	G3N1C8	2	0.0592086	0.88262	n.s.
FKBP8	F1N2P6	9	-0.0760698	0.658167	n.s.
MYO1D	A0AAA9RSU9;Q17R14	29	-0.0363884	0.889614	n.s.
CCDC97	A3KMW0	5	-0.0139229	0.82113	n.s.
TJP1	A0AAA9S4Y0	53	-0.251654	0.0798815	n.s.
LIG1	A0A3S5ZPU0	3	0.183747	0.439969	n.s.
IGF2R	F1MIE6;P08169	37	0.260854	0.132274	n.s.
ACADS	Q3ZBF6;A0AAA9SUD1	14	0.0225773	0.907923	n.s.
ATXN10	Q2TBW0;A0AAA9SI20	19	-0.0234332	0.769334	n.s.
TANC1	G3X6E6	8	0.146915	0.201356	n.s.
SERPINC1	F1MSZ6;P41361	18	-0.447315	0.170545	n.s.
MFAP4	P55918	2	0.51943	0.00406678	n.s.
PHLDB1	A0A3Q1MN58	20	0.347867	0.0641604	n.s.
MRPL24	Q3SYS0	6	0.2602	0.527886	n.s.
EMC1	A0A3Q1M175	23	-0.167052	0.474219	n.s.
ATXN2L	E1BJ59	17	-0.0385802	0.604657	n.s.
CHIA	Q95M17;F1MH27	3	-0.454722	0.301883	n.s.
ZC3HAV1	E1BCF8	27	-0.0780816	0.0951061	n.s.
KIAA0930	F1MEV2	7	0.0150416	0.94446	n.s.
TBC1D10B	F1MJZ7	10	-0.275815	0.000486893	n.s.
GSDME	E1BFC3	9	0.0482328	0.849065	n.s.
AFDN	A0A3Q1M9W3	57	-0.035008	0.755776	n.s.
PTK7	F1MWK8	27	-0.00396109	0.985619	n.s.
DLD	F1N206	11	-0.0541897	0.813104	n.s.
MBLAC1	Q2HJB0;A0AAA9TEJ4	10	-0.150745	0.132701	n.s.
ATP11A	A0A3Q1MCZ4	3	-0.171529	0.640019	n.s.
CTPS2	A0A3Q1LLS1;Q1RMS2	20	-0.119608	0.310172	n.s.
HNRNPR	A0A3Q1MI86	21	-0.104092	0.232461	n.s.
TERF2IP	Q0VCT3	9	-0.112607	0.330931	n.s.
LHPP	Q0VD18	7	0.243808	0.290371	n.s.
RPS8	Q5E958;A0AAF6Z178	10	0.0949855	0.572084	n.s.
BROX	A0AAA9T5V2	4	-0.0550802	0.498504	n.s.
PSMC6	Q2KIW6;A0A3Q1LQF0;A0AAA9SEL8	13	0.0158887	0.746585	n.s.
CES2	F1MU22	4	-0.500905	0.166843	n.s.
HSP90AB1	Q76LV1;G3N2V5;A0A3Q1LTQ4	28	-0.198106	0.032715	n.s.
ACSL5	Q1LZF6	7	-0.333539	0.2269	n.s.
ACO2	P20004	32	-0.168584	0.610421	n.s.
AHNAK	F1MCK2	163	0.317856	0.00205409	n.s.
GOLGA4	A0A3Q1N365	42	-0.0563202	0.353026	n.s.
EIF2S1	P68102	16	-0.044817	0.496006	n.s.
ABCE1	A4IFE6	20	0.164432	0.268334	n.s.
GLG1	A0AAA9SE43	28	0.195677	0.543997	n.s.
LARS1	A0A3Q1N108	37	0.0960336	0.0932199	n.s.
ASPA	F1MUZ8;P46446	10	-0.352521	0.00878187	n.s.
HNRNPM	A0A3Q1MJD5;A0A3Q1M8F3	29	0.00146961	0.976659	n.s.
PAIP1	G3MZ83;F6RWP3	9	0.129882	0.357113	n.s.
RAB28	Q3SWY9	7	0.246119	0.0274922	n.s.
OXSR1	A0AAA9RUX7	9	-0.00615263	0.946755	n.s.
PSAP	P26779;A0A140T8C6	25	-0.0837712	0.47553	n.s.
MARS1	F1MDW1;Q2T9L8	19	0.116311	0.201161	n.s.
MIPEP	A0AAA9SQY1	13	0.12435	0.602437	n.s.
SGSH	E1BFX4	6	-0.133658	0.23285	n.s.
UBE2L3	Q3MHP1	5	-0.105274	0.00389071	n.s.
OXR1	A5PKL1	15	0.0477607	0.786654	n.s.
CGNL1	G5E5V6	17	0.135316	0.0332829	n.s.
HRG	P33433;F1MKS5	17	-0.507618	0.271253	n.s.
SORT1	E1BKZ9	6	-0.506262	0.020765	n.s.
POP4	A0AAF6YJ89;Q2KIB9	4	-0.636189	0.211418	n.s.
ANKRD27	F1N642	6	-0.101349	0.653722	n.s.
NIF3L1	Q05B89	11	-0.322938	0.0808033	n.s.
HSP90AA1	A0A452DI85;Q76LV2;A0AAA9ST28	28	-0.160384	0.094989	n.s.
MLYCD	A5PJC5	14	-0.333333	0.134907	n.s.
CPT2	Q2KJB7;F1N1M7	26	-0.268272	0.269227	n.s.
NCKAP1L	A0AAA9TQN4	4	-0.422331	0.0686318	n.s.
UTRN	A0AAA9TJR2	100	0.345833	0.101781	n.s.
RHOT2	Q5E9M9;A0AAF6YME1	7	0.181143	0.660508	n.s.
SORBS2	A0A3Q1NDV3	32	0.0361156	0.896854	n.s.
RALGAPB	F1MCG4	14	0.0454116	0.516656	n.s.
UQCRC1	G1K1X0;P31800	15	0.126759	0.729981	n.s.
MIDEAS	E1BI11	13	0.00173354	0.985361	n.s.
DOCK9	A0AAA9RS28	41	-0.023684	0.749293	n.s.
CSAD	E1BP41	11	-0.147223	0.243745	n.s.
MYH10	Q27991;A0AAA9SL38	66	0.357756	0.076013	n.s.
SUGP2	E1BE55	22	0.0848269	0.48857	n.s.
MAD1L1	A0A3Q1MWV1	23	0.0287385	0.815031	n.s.
ATP5PF	A0A452DJ42;P02721	3	0.145862	0.757946	n.s.
EHD2	Q2KJ47	24	0.318943	0.173202	n.s.
HADHA	Q3SZ00	20	-0.237659	0.262528	n.s.
STK39	A0AAA9TJD5	5	0.235544	0.184245	n.s.
NUP205	A0A3Q1N4S4	51	0.129668	0.213414	n.s.
SORBS3	A0A3Q1M0U3	19	0.331246	0.0695593	n.s.
NHP2	Q5E950	4	0.158801	0.299103	n.s.
UBA2	A4FV12	23	-0.152784	0.271177	n.s.
STK24	A0AAA9TSZ5	10	-0.204421	0.0160895	n.s.
GGTA1	P14769	6	-0.120375	0.8727	n.s.
RPS6KA1	A0AAA9SJ92	21	-0.126028	0.294151	n.s.
MORF4L2	A6H7C1	3	0.0877297	0.521282	n.s.
DVL1	F1N6M9	4	0.100205	0.374236	n.s.
CORO1A	Q92176	13	-0.459499	0.00499568	n.s.
POLR2H	F2Z4H3	4	0.0624619	0.342332	n.s.
LRP2	F1N6H1	64	0.121071	0.804646	n.s.
THOC2	F1N153;G3MZE5	30	-0.0582223	0.440984	n.s.
CDK6	E1BC36	8	0.133559	0.0699261	n.s.
EFEMP1	A0A3Q1MIU1	14	0.0880666	0.298928	n.s.
EHD4	E1BJV0	16	-0.0614853	0.741323	n.s.
RALA	Q3ZCK2	5	-0.0935516	0.626216	n.s.
RPS14	A0A3Q1MCJ7;A0A3Q1LNR2;F1MR01	5	0.0558395	0.488788	n.s.
NPM1	E1BCL3;A0AAA9RVD2;Q3T160;A0A3Q1LR94	7	0.342537	0.00292234	n.s.
HSD3B7	Q3MHF2	3	-0.150783	0.658435	n.s.
PACSIN3	A0AAA9TSI6	6	0.172249	0.424261	n.s.
CHDH	E1BES2	17	-0.0173869	0.968703	n.s.
AMBP	P00978;F1MMK9	15	-0.643792	0.0983982	n.s.
SRGAP1	F1MFS4	5	0.358421	0.0363655	n.s.
ZFYVE9	F1MKY4	11	0.051466	0.767315	n.s.
TKDP4	F1MNL9;G3MYT1	4	0.40628	0.777423	n.s.
NUP153	A0AAA9TXI1	32	0.00189495	0.982933	n.s.
MYOF	F1N3I4	81	0.229508	0.285596	n.s.
VAC14	F1MJZ1;A2VE70	21	0.0692749	0.465955	n.s.
LAMA4	A0A3Q1N9E9	27	0.349053	0.147463	n.s.
SPINT2	Q2KJ54	7	0.332921	0.369526	n.s.
UPF1	E1BEK9	42	0.0839911	0.0257511	n.s.
EGFLAM	A3KN33;A0AAA9SGV8	11	0.489248	0.0125715	n.s.
N4BP1	A0A3Q1ME40	7	-0.336752	0.0469554	n.s.
GORASP2	F1MSB5	7	-0.0357924	0.375088	n.s.
PAX2	A0A3Q1LYL1	2	-0.129652	0.595824	n.s.
USP15	Q2HJE4	23	-0.0392256	0.714391	n.s.
PSMC4	Q3T030	19	0.0247669	0.793123	n.s.
NCBP3	E1BM89	7	-0.192818	0.193109	n.s.
SEPTIN9	A0A3Q1MB56	28	0.250647	0.045732	n.s.
SEPTIN7	Q6Q137	22	0.271218	0.072779	n.s.
SEPTIN4	A0A3Q1MXU1	8	-0.0286446	0.927842	n.s.
ANXA8	Q95L54	18	0.0580459	0.845245	n.s.
NUP98	E1BCV4	46	0.0464091	0.689213	n.s.
NUFIP2	A0AAA9TDA2	11	-0.0522165	0.765256	n.s.
COG3	E1BGA6	20	-0.134692	0.100851	n.s.
EHMT1	A0A3Q1LPD0	4	-0.0477421	0.8547	n.s.
BRD3	F1MMU3	8	0.102989	0.608108	n.s.
DYNC2I1	A0AAA9RW32	10	0.149965	0.230827	n.s.
DES	O62654	26	0.898682	0.112814	n.s.
PSMD9	Q3SZ19	7	-0.336115	0.00661232	n.s.
PTCD3	Q2KI62	9	0.365422	0.32595	n.s.
GPHN	A0A3Q1N4F3	28	-0.265879	0.128694	n.s.
SSRP1	A0A3Q1MNI4	14	0.136672	0.183221	n.s.
BZW2	A0AAA9RSW0	13	0.0920191	0.657018	n.s.
AMACR	F1MCN8	2	-0.086946	0.726723	n.s.
TRIM28	E1BJG5	22	0.0848112	0.400345	n.s.
HSPA14	Q2YDD0;G3MY73	9	-0.00433803	0.952352	n.s.
PARL	Q2KHV4;A0A452DJF2	3	0.243283	0.580555	n.s.
TFAM	Q0II87;E1BA21	6	-0.304301	0.122208	n.s.
ATP6V1A	A0A452DJG1;P31404	24	0.0941472	0.56626	n.s.
LIMD1	G5E5X0	13	0.148954	0.368869	n.s.
ENPP6	F1N5C8	10	0.0552073	0.897562	n.s.
ENPP4	A2VDP5	5	-0.280026	0.319675	n.s.
ESRP2	A0AAA9S204	9	-0.181956	0.141263	n.s.
SMARCE1	F6RNR1	8	0.0982733	0.283237	n.s.
TIMM8A	Q3ZBS8	4	-0.131785	0.484622	n.s.
RBM26	A0A3Q1MNU7	13	-0.0706928	0.398439	n.s.
AGFG2	A0A3Q1M883	7	0.163682	0.173097	n.s.
KRT7	Q29S21;A0A3Q1MKC8	29	-0.317815	0.157565	n.s.
PAPSS2	A0AAA9SX99	15	-0.278998	0.401808	n.s.
CCDC8	A0AAA9SDF5	5	0.874764	0.00578947	n.s.
PKN1	A0AAF7AT19;A1A4I4	12	0.0107293	0.921411	n.s.
VAV1	Q08DN7	17	-0.582619	0.0178601	n.s.
ZZEF1	A0AAA9TUR4	28	0.0759406	0.822443	n.s.
ASL	A0AAA9T703;Q3SZJ0	21	-0.0532975	0.7438	n.s.
COMMD10	A4FUB5	7	-0.0355055	0.748017	n.s.
RPS10	Q3T0F4	7	0.151011	0.155594	n.s.
WBP2	E1BGX4	6	-0.155642	0.240629	n.s.
PXMP2	A0A452DI69;Q2KIY1	2	-0.474888	0.259822	n.s.
DNAJB2	A0AAA9TVG8	5	0.398884	0.0120246	n.s.
FLNA	F1N169	99	0.91109	0.0141254	n.s.
TBC1D15	A0A3Q1MTW0	13	-0.0295143	0.780083	n.s.
MVP	Q3SYU9;A0A3Q1MFD0	30	0.271657	0.125311	n.s.
FADS6	A2VE15	4	-0.468161	0.06661	n.s.
SPATS2	F1MK70;E1BKY8	11	0.250565	0.11719	n.s.
SIPA1	A0AAA9TDI5	8	0.140674	0.230922	n.s.
EHBP1L1	E1BL45	6	0.322852	0.135421	n.s.
COMMD9	Q2TBN5;F1MIC5	7	0.159819	0.0761633	n.s.
KIF13B	A0A3Q1NM85	64	-0.265944	0.163563	n.s.
PCOLCE	Q2HJB6	17	0.177411	0.295181	n.s.
FASN	F1N647;Q71SP7	84	0.136641	0.869041	n.s.
PALM	F1N3Q4	5	0.531934	0.00534591	n.s.
HNRNPUL1	F6Q807	16	0.158129	0.205447	n.s.
DNAJC7	F1N7H0	13	-0.0664515	0.341136	n.s.
ACOT2	A0A3Q1MH73;A6QQA9	10	-0.302159	0.153783	n.s.
PAPLN	A0AAA9RVQ1	18	0.128397	0.579365	n.s.
EP300	E1B8D6	4	-0.0250821	0.84531	n.s.
LOC515570	F1MF76	28	0.00255108	0.989221	n.s.
NOTCH2	F1MPE9	11	-0.0678198	0.596532	n.s.
PARD3	A0A3Q1MT26	20	-0.013901	0.872833	n.s.
LUZP1	E1BKT0	12	0.0774965	0.0456254	n.s.
MARCKS	P12624	7	-0.0733004	0.664204	n.s.
TBCA	P48427;A0A3Q1M6V1	11	-0.419609	0.195169	n.s.
ANXA2	P04272	23	0.0916357	0.392823	n.s.
RPS2	A0A3Q1MAT9;O18789;A0A3Q1LT23;A0A3Q1MBL4;A0AAA9S423	11	0.0285816	0.733066	n.s.
ADO	G3MZK0	8	-0.151602	0.0919752	n.s.
DSCC1	A0AAA9S5L7	2	-0.191066	0.684544	n.s.
MYH14	A0AAA9S4Q7	83	-0.274445	0.289023	n.s.
PCNA	Q3ZBW4	7	-0.0184202	0.826954	n.s.
DYNC1LI1	Q2KII9	18	0.000991344	0.984053	n.s.
DFFB	Q58CZ0;A0AAA9TRD2	9	0.0498369	0.68389	n.s.
NPTN	A0A3Q1LL79	3	-0.00792027	0.976854	n.s.
VCAM1	A7MBB0;Q9GKR3	2	-0.307887	0.178656	n.s.
ARHGEF37	F1MJ96	16	0.0659955	0.58108	n.s.
CHURC1	Q2HJG7;A0AAA9S2T1	2	0.313104	0.0394156	n.s.
EPB41L3	E1B7S3	23	-0.0728531	0.660414	n.s.
MED24	A0A3Q1MN23	10	0.0866807	0.286033	n.s.
LAMA2	A0A3Q1MFB8	33	0.557201	0.00593337	n.s.
DSP	E1BKT9	108	-0.0594978	0.420277	n.s.
CANX	A7Z066	23	-0.0708151	0.750789	n.s.
RALB	A5D977	5	-0.0017705	0.991859	n.s.
RASAL1	A0A3Q1N802	7	0.264605	0.255282	n.s.
DBNL	A0A452DIT4;A6H7G2	18	-0.0896249	0.43061	n.s.
RAB25	Q58DW6	8	0.248052	0.55377	n.s.
LMOD1	A4IFK3	10	0.589114	0.0131713	n.s.
NDUFV3	A0A3Q1N7L1;P25712	13	-0.0604258	0.855995	n.s.
EPHX2	F6QS88	23	0.138156	0.605814	n.s.
ARHGAP45	A0AAA9S2U6	7	-0.335375	0.0224548	n.s.
KCTD18	Q29RJ0	6	0.0622764	0.527548	n.s.
TFIP11	Q29RR5;F1MR60	15	-0.00487304	0.9637	n.s.
NUDCD1	E1BLF7	16	0.0942461	0.563174	n.s.
EXOSC9	Q3SWZ4;F1MB54	8	0.289624	0.0594694	n.s.
RHOT1	Q2HJF8	6	0.0136752	0.964349	n.s.
UBTF	A0AAA9TQ73	18	0.214854	0.0472662	n.s.
SETD3	F6R2J7	10	0.167108	0.0409141	n.s.
ACAA1	Q3ZC41	13	-0.280958	0.178405	n.s.
TBCC	Q3SZE9	10	-0.120361	0.092418	n.s.
RABEP2	A4FUG8	19	0.0409541	0.691614	n.s.
DNM1L	Q2KIA5	27	0.261904	0.0540003	n.s.
NPL	Q29RY9	15	-0.301693	0.291868	n.s.
MED9	Q2KHX9	3	-0.306786	0.169174	n.s.
COG4	A0AAF6YYF2;Q3MHG0	17	-0.0322866	0.787768	n.s.
PLEKHA6	E1BK42	16	-0.0203133	0.860209	n.s.
C1QBP	Q3T0B6	4	-0.201439	0.469292	n.s.
CKAP4	F1ME65	30	0.0566468	0.827625	n.s.
OGFOD1	Q3MI03	7	0.104085	0.495931	n.s.
TOP1	A0AAA9TV68	21	-0.164663	0.0480107	n.s.
HDGFL2	F1MT65	8	0.102013	0.138585	n.s.
FUNDC2	Q8MJN0;A0AAF6Z380	7	-0.308119	0.168821	n.s.
CC2D1B	F1N7R5	12	0.0251968	0.834251	n.s.
ARHGDIA	P19803;A0A452DJ82	11	0.109847	0.305996	n.s.
BMS1	E1BPP2	10	-0.0744743	0.639822	n.s.
ENOPH1	Q0VD27;A0AAA9TBH1	6	-0.267835	0.0433826	n.s.
EXOSC8	Q2KHU3	7	0.0570192	0.717988	n.s.
PHF6	A0AAF6Z126;Q08DR0	7	0.142331	0.203423	n.s.
TAF6	Q58DG7	8	-0.177083	0.105388	n.s.
HEATR5A	E1BGU0	7	0.143238	0.493465	n.s.
S100A11	A0AAA9TWM3	3	-0.579012	0.00217087	n.s.
PLS1	A6H742	21	-0.242669	0.0463746	n.s.
ARHGEF5	F1N2G5	18	-0.284859	0.0687099	n.s.
FIP1L1	E1BKM0	7	-0.0922766	0.471265	n.s.
SMARCD1	Q2TBN1;F1MTG9	6	0.203183	0.0969492	n.s.
BASP1	P80724	11	-0.0651913	0.608338	n.s.
NECTIN4	Q5E9Z9;A0AAA9SRB3	8	-0.334653	0.022326	n.s.
PRR14	A0A452DJ07;Q0VBZ8	8	0.169426	0.368955	n.s.
FUBP3	A6QP83	11	-0.114677	0.0546182	n.s.
TUT1	Q1JPD6;A0A3Q1MNQ1	3	0.0445199	0.320994	n.s.
LRPAP1	A0A3Q1MD85	7	0.31569	0.14816	n.s.
IDE	A0AAA9U0H2;Q24K02	26	-0.146408	0.118875	n.s.
RPL13A	Q3SZ90	5	0.0870986	0.601228	n.s.
PKM	A0AAA9RXQ2	29	0.107811	0.26572	n.s.
ABCF3	A0AAF6DM45	9	0.44927	0.0830549	n.s.
ATAD3	A7YWC4	16	-0.128721	0.69392	n.s.
FAM120A	A0A3Q1MFI2;A6H7H1	31	0.112127	0.211103	n.s.
BCAM	Q9MZ08	17	-0.157623	0.331095	n.s.
ADAMTS13	A0A3Q1M0L5	16	-0.0673263	0.779222	n.s.
PPP5C	F1N719	13	-0.0718448	0.456125	n.s.
GIT1	A0A3Q1M7Q3	13	0.110069	0.133766	n.s.
GCC2	E1BB16	22	-0.0765159	0.360886	n.s.
LMNB1	A7YY47	36	-0.251493	0.0442967	n.s.
TARS1	Q3ZBV8	33	-0.143188	0.116055	n.s.
MPRIP	A0A3Q1LSA5	26	0.0745752	0.600496	n.s.
CMAS	Q3SZM5	19	-0.0542378	0.691985	n.s.
PRRC2C	G3X6B2	20	-0.0851502	0.0740462	n.s.
SMPDL3B	A6QQN6	9	0.0856664	0.753877	n.s.
MORC3	F1MFY1	17	-0.553257	0.000987255	n.s.
RALBP1	F1MPV3	4	-0.000230789	0.997207	n.s.
FLNC	A0A3Q1LV98	75	0.647862	0.0320216	n.s.
E2F4	F1MBE6	4	0.427876	0.0174244	n.s.
TM9SF2	F1N672	9	-0.0260265	0.943196	n.s.
PLD1	A0A3Q1LL74	12	-0.104202	0.813151	n.s.
KIF3B	F1N020	6	0.189943	0.200785	n.s.
ALDH18A1	Q2KJH7	27	-0.446689	0.210295	n.s.
VPS25	A0AAF6Z7J4;Q5E9A6	11	0.0744729	0.580941	n.s.
RAPGEF2	F1MSG6;A0A3Q1N0F9	6	-0.256433	0.329705	n.s.
RCN3	Q2KJ39;A0A3Q1NEH4	10	0.482739	0.00291534	n.s.
RNF214	F1MLH7	6	0.0413752	0.796701	n.s.
POLR2A	G3MZY8	32	0.0678821	0.586039	n.s.
KATNB1	A6QQU1	6	-0.0271292	0.881987	n.s.
EIF1AD	A0AAF6Z7A4;Q58CY2	5	0.42632	0.114285	n.s.
ATIC	Q0VCK0;A0AAF6Z6Q7	30	-0.0512705	0.617039	n.s.
DCTN1	A0A3Q1LJA4	43	0.0582871	0.409784	n.s.
CSPG4	F1MY84	15	0.120275	0.399297	n.s.
TBP	A0AAF6ZDS6;Q2HJ52;F1MKV5	2	-0.0319059	0.844098	n.s.
RBPMS	A0AAA9SL39	4	0.518952	0.0440864	n.s.
TECPR2	A0AAA9TKT9	13	0.135594	0.28673	n.s.
SLC27A5	A6QM10	16	-0.00518322	0.990738	n.s.
INTS10	A5PJT2	12	-0.0905147	0.334308	n.s.
ZHX3	E1BGF9	8	0.462324	0.13805	n.s.
SFPQ	E1BQ37	23	-0.0901136	0.447391	n.s.
PSPC1	Q1LZD9;A0AAF6YLV5	13	-0.0608292	0.619574	n.s.
PRP4K	Q08DZ2;A0A3Q1MNY8	17	-0.0951867	0.482663	n.s.
RSPH9	Q2KIU7	6	-0.347064	0.0998572	n.s.
CCDC6	F1N091	22	-0.317474	0.1417	n.s.
GPC1	G3X745;A0A452DIL6	13	0.088557	0.435829	n.s.
XPO6	F1MI29	8	0.115889	0.2928	n.s.
UTP20	E1BGE2	11	0.207224	0.201578	n.s.
SPTBN1	A0A3Q1MXU7	92	0.200838	0.177185	n.s.
IDI1	Q1LZ95;A0A140T853	15	-0.289288	0.0863744	n.s.
SMC3	O97594;A7Z065	44	-0.0663171	0.449801	n.s.
DNAJC13	F1MDR7	40	0.213245	0.118082	n.s.
NELFB	G5E5S2	23	0.0630507	0.208616	n.s.
VMAC	A7YWC8	4	-0.0417643	0.751415	n.s.
BNIP1	F1N353	4	-0.122286	0.574957	n.s.
SSB	P10881	23	-0.0417337	0.595642	n.s.
RPS3	Q3T169;A0AAA9TQX8	12	0.161312	0.0653824	n.s.
STRN	A0A3Q1MGW7	19	-0.0498576	0.32504	n.s.
SYNM	E1BIS6	27	0.564651	0.0944787	n.s.
COL6A3	E1BB91	93	0.098309	0.766272	n.s.
SMPD2	F1N588	8	0.724653	0.508872	n.s.
ZFHX3	E1BPV9	2	0.434294	0.48586	n.s.
RUFY1	A0AAA9S3N9	13	0.12642	0.195546	n.s.
MED16	G5E6J3	9	-0.0872424	0.144725	n.s.
PSMD11	Q2KI42;A0A3Q1MDI3	18	-0.0937386	0.0528058	n.s.
EXOC2	E1BDW9	29	-0.0150948	0.830921	n.s.
CACYBP	Q3T168	13	-0.0382476	0.465516	n.s.
MON2	A0AAA9T6Y7	26	0.189573	0.31536	n.s.
DCAF1	A0A3Q1LW88	23	-0.0583005	0.608877	n.s.
NASP	A0A3Q1M1D3;Q2T9P4	26	-0.102373	0.271461	n.s.
TPD52L1	Q0VBY4	7	0.183386	0.599892	n.s.
SIN3A	F1MTR3	24	-0.0127685	0.898749	n.s.
ACSS2	A0A3Q1MB37	18	-0.283445	0.275374	n.s.
ALDH6A1	Q07536;F1N7K8	20	-0.387904	0.0113483	n.s.
MYH11	A0A3Q1LWN6	73	1.47577	0.0666519	n.s.
LSG1	A0A3Q1MV30;Q2YDM7	6	-0.0986803	0.461182	n.s.
NCALD	P61602	4	-0.0887613	0.753555	n.s.
CCZ1	Q0VD30	12	0.0338302	0.467482	n.s.
SCPEP1	Q2NKZ9	7	0.0564127	0.794251	n.s.
ATP13A1	F1MYA8	25	0.0055728	0.977883	n.s.
GATM	Q2HJ74	14	0.399701	0.664797	n.s.
BCAP31	Q5E9F1	9	-0.0738974	0.729685	n.s.
ARPC4	Q148J6	6	-0.025455	0.714514	n.s.
IGF1R	G1K218;Q05688	10	-0.12002	0.565941	n.s.
TM9SF4	A5D7E2	6	0.29711	0.383625	n.s.
HEXIM1	Q0X0C4	7	-0.0150471	0.893305	n.s.
LPCAT4	A0AAA9SAW2	9	-0.0625794	0.903871	n.s.
CCDC170	A0AAA9S743	8	-0.126604	0.453511	n.s.
LRPPRC	A0AAA9SR44	53	0.380804	0.375815	n.s.
NSF	A0A3Q1MR04	26	-0.0620408	0.490889	n.s.
MICAL2	F1MF74;A0A3Q1MTT2	4	0.0785668	0.702633	n.s.
OTUD4	E1BN58	6	-0.182669	0.205678	n.s.
PRRC2A	E1BAF6	22	0.0314226	0.714789	n.s.
SLC35B2	Q3ZBB0	6	-0.298881	0.210711	n.s.
RTN4	F1N405	14	-0.21366	0.150479	n.s.
MTMR6	E1BJH8	23	0.12517	0.0556873	n.s.
IARS1	A7MBC5	39	0.0199947	0.519811	n.s.
DIABLO	A0AAA9T9X9	3	-0.0799284	0.600869	n.s.
FOLR1	P02702;A0A3Q1MRP4	7	0.628821	0.366825	n.s.
EIF3B	A7MB16	24	0.106007	0.268102	n.s.
LPGAT1	A0A3Q1LJ78	6	0.0297627	0.932342	n.s.
CHORDC1	Q29RL2	7	-0.314705	0.080015	n.s.
ILF3	F1MMA0	23	0.004632	0.950788	n.s.
OGFR	F6RA54	10	-0.226201	0.0786421	n.s.
PLSCR3	A0AAA9RZG2	2	-0.450745	0.0520895	n.s.
USP47	A0A3Q1NK97	29	0.107252	0.138295	n.s.
PCM1	A0A3Q1LX22	20	0.0667264	0.522488	n.s.
ELP1	A0A3Q1M6R3	21	0.00844479	0.921888	n.s.
LRRFIP2	E1BBW0;Q2T9W6	10	-0.13729	0.30334	n.s.
METTL3	F1MX80	18	0.0606437	0.486496	n.s.
PIP4K2B	F1MHT2	9	0.183245	0.173209	n.s.
SNX29	Q08DX0;A0A3Q1N0T4	4	0.209994	0.162776	n.s.
SERPINB12	E1BDF5	16	-0.101076	0.874228	n.s.
OGDH	Q148N0;A0AAF6YPM1	37	-0.343455	0.112536	n.s.
DIAPH1	A0A3Q1LUD9	34	-0.045666	0.824933	n.s.
STOML2	Q32LL2;A5PJA6	16	0.01859	0.939566	n.s.
TJP3	A0A3Q1MSB9	13	-0.107938	0.434633	n.s.
LUC7L	F1MMH3	3	0.0242815	0.83122	n.s.
TJP2	A0A3Q1MPV5	33	-0.195972	0.0762914	n.s.
SP2	A0AAA9S4T0;Q5E9U0	2	0.219767	0.152739	n.s.
RMDN1	Q32KL4;A0AAA9T0I3;F1MFW0	7	0.0488784	0.730157	n.s.
CCDC174	A0AAA9T157	2	0.299367	0.264588	n.s.
DPY19L1	F1N3H6	4	0.313243	0.419606	n.s.
USP10	A5PJS6;A0AAF6YU44	13	-0.144646	0.112542	n.s.
LOC112445002	A0AAA9SRZ1;A0A3Q1ML81	7	0.0649703	0.736537	n.s.
F11	F1MUT4;Q5NTB3	7	-0.412315	0.180009	n.s.
PLS3	A7E3Q8	21	-0.0168581	0.832415	n.s.
WDR44	Q9XSC3	21	-0.022769	0.843072	n.s.
SYNJ1	A0A3Q1MIH5;O18964	22	0.213053	0.0606629	n.s.
TPR	A0AAA9T4R9	72	-0.0796037	0.583403	n.s.
PPL	F1N2K8	60	-0.388077	0.0068696	n.s.
CRYBG1	E1BH02	14	-0.316595	0.243448	n.s.
GPS1	A0AAA9S1F3	14	0.0978665	0.0984203	n.s.
DPP3	A0AAA9T7D8	23	0.00997972	0.908888	n.s.
SCAF4	A0A3Q1MTL1	4	-0.0217662	0.883728	n.s.
DMAP1	Q1LZ99	8	0.00619841	0.946538	n.s.
SARS2	A0AAA9SXU5;Q9N0F3	21	-0.153433	0.551609	n.s.
MAP1B	A0A3Q1MTY6	30	0.663395	0.0405704	n.s.
TRAF3IP1	A0AAA9TZY6	3	0.0966547	0.568364	n.s.
SEH1L	A7YY75	13	0.214063	0.111861	n.s.
LAMB2	E1BDK6	31	0.424712	0.167451	n.s.
UBA3	A0A3Q1M200	11	0.110932	0.188423	n.s.
AHNAK2	A0A3Q1MK97	18	0.361219	0.0442034	n.s.
ODF2	Q2T9U2;F1MU43	15	-0.0325174	0.74076	n.s.
OPTN	Q3ZC32	17	-0.0838315	0.777537	n.s.
GET4	Q0P5I8	5	-0.00287151	0.962672	n.s.
SF3B3	A0JN52	37	0.0118117	0.909303	n.s.
APRT	A0A452DIE3;Q56JW4	7	-0.327425	0.00394133	n.s.
BZW1	F1MZK4	11	0.0245733	0.816288	n.s.
SYMPK	E1BJF6	22	-0.0022409	0.983002	n.s.
LRBA	A0A3Q1MGD3	61	0.00885296	0.967641	n.s.
NTAN1	A0A3Q1NBY0	5	-0.153138	0.305741	n.s.
ARMT1	A3KMX8;F1MC76	15	-0.139691	0.597621	n.s.
GARS1	A5D7A2	23	-0.425307	0.087864	n.s.
USP43	E1BKF4	8	-0.582159	0.403061	n.s.
THOC5	A4IFQ0;F1MS93	16	0.0652733	0.447094	n.s.
KCNAB2	Q27955;A0A452DJB7	4	0.119102	0.51987	n.s.
GHITM	Q3SZK3	4	-0.0165176	0.952327	n.s.
ANKHD1	A0A3Q1M7L2	17	-0.162009	0.0574902	n.s.
UBR3	F1MQK6	8	0.25531	0.0933415	n.s.
RABGAP1L	F6QEG6	15	0.241047	0.109692	n.s.
TSR2	Q3T090;A0A452DIP4	3	0.059154	0.642572	n.s.
AASDHPPT	A0A3Q1LL63;G3MZI2	10	0.502435	0.0313303	n.s.
LPIN3	E1BLQ9	4	-0.108601	0.503767	n.s.
PTPN12	A0A3Q1M0B4	16	-0.0083921	0.932972	n.s.
AOC1	Q3MHQ1	5	0.187896	0.311982	n.s.
ZNF800	E1BPK3	5	-0.345235	0.141804	n.s.
GMIP	A0AAA9SMC0	5	-0.406876	0.0959197	n.s.
RDX	Q32LP2	20	-0.115877	0.374734	n.s.
OCRL	A0AAA9U0Y4	14	0.191104	0.0584618	n.s.
ANKLE2	A0A3Q1LKM4	20	0.0525672	0.495979	n.s.
NAA15	A0AAA9RY84	21	-0.0537148	0.687643	n.s.
IGFALS	A0AAA9TBM6	20	-0.22639	0.402146	n.s.
CHCHD3	Q5E9D3	9	-0.036438	0.921711	n.s.
NAPRT	A5PK51;F1N3B0	14	-0.318372	0.210906	n.s.
CDC42BPB	E1BP72	42	0.0342135	0.672896	n.s.
RBM27	A0A3Q1NNK5	5	0.176683	0.127124	n.s.
HIBCH	Q2HJ73;F1MPK4	13	-0.348236	0.0966595	n.s.
ABHD1	Q3T0A0	5	-0.608883	0.087503	n.s.
SNX16	A0A3Q1MTG5	3	-0.184522	0.13573	n.s.
LOC112443783	A0A3Q1N864	2	0.0213988	0.869189	n.s.
ZNF330	Q32LC9;E1BD90	4	0.135496	0.270476	n.s.
NRDC	A0A3Q1LY70	11	0.161053	0.305958	n.s.
SPAG9	A0A3Q1LP94	31	0.0590582	0.168037	n.s.
NOL6	A5PJU0	9	0.203435	0.174967	n.s.
C5	F1MY85;P12082	45	-0.319808	0.308321	n.s.
GALC	A0AAA9SDL9	12	-0.000391006	0.99838	n.s.
MRPS23	A0A3Q1M7M3;Q2NL27	4	0.340244	0.29165	n.s.
LNPEP	A0A3Q1LSE7	14	-0.257182	0.1881	n.s.
NDUFB10	Q02373	8	0.182849	0.644576	n.s.
APAF1	A0A3Q1LZZ2	16	-0.0911617	0.220144	n.s.
TXNRD2	Q9N2I8	16	-0.476446	0.0725495	n.s.
ACLY	Q32PF2	42	-0.0318832	0.746821	n.s.
EEF2K	E1BEM1	7	-0.0480347	0.743865	n.s.
OLA1	A0A3Q1LZU5;Q2HJ33	18	-0.0541062	0.374382	n.s.
ECE1	P42891	10	-0.231718	0.307141	n.s.
HMOX2	F1MTY9	15	-0.102823	0.752103	n.s.
ORC4	Q2YDI2	6	0.0171189	0.902588	n.s.
LLGL2	A0AAA9SWS7	26	0.154554	0.560328	n.s.
PCCB	A0A3Q1LPE3;Q2TBR0	21	-0.379011	0.214002	n.s.
LMO7	A0A3Q1M7E1	47	-0.102979	0.353794	n.s.
SGPL1	A5D788	10	-0.00437307	0.983461	n.s.
SNX21	A0A3Q1LUX4	7	-0.00349426	0.987285	n.s.
CRTC3	F1N1Z3	6	-0.196354	0.207723	n.s.
ARHGAP5	E1BM23	18	0.0542636	0.333026	n.s.
PGAP1	A0AAA9SE06	5	-0.177426	0.539395	n.s.
PIGS	A0AAA9RZX1;Q3SZL5	6	0.0733209	0.802923	n.s.
NPEPPS	E1BP91	35	-0.119248	0.329903	n.s.
ST14	A0AAA9SRJ3;Q0IIH7	18	-0.386601	0.0265999	n.s.
PADI2	A0AAA9SRB9	13	0.168314	0.199145	n.s.
GMPR2	A0AAA9SH20;Q32L93	15	-0.112412	0.365455	n.s.
PICK1	A0A3Q1MC64;Q2T9M1	5	-0.412727	0.0536169	n.s.
CTBP1	A0A3Q1M504	8	-0.00233889	0.971208	n.s.
OTUB1	Q3T0Y1	14	0.0510178	0.510041	n.s.
CTBP2	Q0VCQ1	8	0.0423636	0.649542	n.s.
FN3K	A0AAA9TNS6	3	0.143277	0.433026	n.s.
CUL4B	A0AAA9T9F6	23	-0.21657	0.0512021	n.s.
KYAT1	A0AAA9S4Y7	9	-0.236816	0.109563	n.s.
DAB2	A0A3Q1LSX5	8	0.321609	0.26939	n.s.
SRSF3	Q3SZR8;A0AAA9SK06	3	-0.46895	0.0278536	n.s.
XYLB	A0A3Q1LRL7;Q3SYZ6	12	-0.169569	0.185695	n.s.
TCP1	Q32L40;G5E531	26	-0.0755305	0.161507	n.s.
ACBD3	F1MRE5	17	0.0548897	0.572494	n.s.
ATP2B4	D3K0R6;F1MQ01	12	-0.00373316	0.987424	n.s.
MED27	Q2TBN7	5	0.117336	0.396001	n.s.
ARHGEF1	E1BG38	22	0.118002	0.34826	n.s.
COMT	F1MMK0;A7MBI7	14	0.374119	0.0851081	n.s.
QARS1	Q3MHH4	23	-0.0396891	0.718644	n.s.
ERMP1	F1MI95	18	-0.0182176	0.930736	n.s.
EFTUD2	A4FUD3;F1N6D5	37	-0.0292292	0.682077	n.s.
NOL7	Q3SZ46	3	-0.0785904	0.558272	n.s.
ACSM1	Q9BEA2;F1MPP7	13	-0.603053	0.458152	n.s.
MBD2	G5E683	8	0.146503	0.566176	n.s.
MRPL39	Q05B74	10	0.189208	0.597159	n.s.
GSTP1	P28801;A0A3Q1LMV5;A0A452DHY4	12	0.0628991	0.626959	n.s.
TRAP1	Q2TBI4	25	-0.0645399	0.686981	n.s.
PTGES2	Q66LN0;A0A3Q1LFK5	15	-0.0778868	0.772398	n.s.
WWP2	A0A3Q1NIL1	3	0.182533	0.101469	n.s.
OGT	A0A3S5ZPK0	21	0.152322	0.0333296	n.s.
THUMPD1	Q24K03;A0AAF6ZNP5	9	-0.095099	0.187668	n.s.
GALK1	A6H768;A0AAA9TPL4	15	-0.0920343	0.312898	n.s.
MPG	F1MKN2	12	-0.00602484	0.921102	n.s.
TRAPPC12	A6QLC8	11	-0.12778	0.0169403	n.s.
RPL34	F1ML72;A0AAA9SX40	4	0.0121975	0.973037	n.s.
VCPIP1	A0AAA9T9Z2	23	-0.337772	0.00217339	n.s.
PLD3	Q2KJJ8	6	0.226571	0.294778	n.s.
LONP1	Q59HJ6;A0AAA9S896	26	-0.483674	0.0359486	n.s.
DYRK1A	A0A3Q1LNU2	8	0.0607812	0.628601	n.s.
SMARCA4	A0AAA9TIX2;A7Z019	14	0.0489979	0.488327	n.s.
SDK1	F1MFI5	8	-0.0440755	0.793185	n.s.
MIA2	A0A3Q1MUH0	13	-0.080631	0.632102	n.s.
INTS5	A1L552	10	-0.0757172	0.460437	n.s.
RAB10	A6QLS9	5	-0.294631	0.0477777	n.s.
CEBPZ	F1MHM7	11	0.132912	0.492117	n.s.
IQGAP2	A0AAA9TLU6	62	-0.0966277	0.607142	n.s.
OLFML1	F1N583	19	0.0211196	0.934531	n.s.
CDCP1	G3N093	10	-0.484928	0.0270457	n.s.
SERPING1	A0AAA9TZ37;P50448	13	-0.500012	0.0718056	n.s.
MBD3	A0AAA9T4U1	7	-0.0617485	0.633354	n.s.
DHRS12	A6QP05;A0A3Q1M3R6	8	0.149361	0.477795	n.s.
RBM19	A0AAA9TXU2	9	0.12166	0.364568	n.s.
HSPH1	Q0IIM3	33	-0.06001	0.466485	n.s.
VAMP7	A0AAA9SMQ2;Q17QI5	7	-0.27161	0.264546	n.s.
TTC21B	A7MB60	9	0.191374	0.10237	n.s.
RORB	F1MWS0	4	0.85932	0.014898	n.s.
DNAJC2	A0AAA9S105;Q1RMH9	10	-0.0732784	0.527574	n.s.
NDUFAF6	A7YVD7	9	0.0430105	0.861411	n.s.
MCM3AP	E1BJE7	18	0.00432229	0.966748	n.s.
SLC25A15	Q2KHW4	12	0.0198381	0.968937	n.s.
GUCY1B1	P16068;A0AAF6YLE3	20	0.108172	0.605247	n.s.
METTL26	A0AAF6YK97;Q32KX8	7	-0.121587	0.200209	n.s.
CUL3	A0AAA9T669	33	-0.0252252	0.690991	n.s.
LANCL2	A0AAF6DMH4	18	-0.0638971	0.429886	n.s.
LANCL1	F1MVX2;A0AAF6Z0W3	17	-0.178463	0.149917	n.s.
MTRR	F1MGP5;Q4JIJ2	8	-0.17778	0.281582	n.s.
BAIAP2	Q5EAD0	18	0.093257	0.726745	n.s.
ERAP2	A0AAF6YHD2;A6QPT7	30	-0.477002	0.0844875	n.s.
SLC9A1	Q28036	4	-0.008955	0.938111	n.s.
ZNF451	E1BGM1	3	0.0323465	0.841993	n.s.
MICAL3	G3MWR8;A0A452DJI0	15	0.196111	0.228025	n.s.
SSH3	F1MI92	12	0.0339437	0.539514	n.s.
PRDX3	P35705	9	-0.170011	0.425517	n.s.
UBR7	A3KMX6	7	0.302031	0.0390854	n.s.
MMP2	Q9GLE5;F1MKH8	14	0.544631	0.0042148	n.s.
XRCC5	A7MBA7	19	-0.00078702	0.990475	n.s.
HSPA4	E1BBY7	34	-0.0764389	0.354952	n.s.
UBXN1	Q32KW2	5	0.110196	0.189561	n.s.
THBS4	Q3SWW8;A0A452DJ62	5	-0.0224655	0.925694	n.s.
ZKSCAN1	E1BIL7	11	0.0662704	0.158772	n.s.
PTPN9	F1N6W1	9	0.0692194	0.599518	n.s.
PFAS	A0A3Q1M913	28	0.321739	0.0356218	n.s.
SEC61A2	Q2KHX4	2	-0.271332	0.35892	n.s.
SEC61A1	Q5EA68	5	0.0422211	0.844632	n.s.
EOGT	A0JND3	7	-0.102387	0.731638	n.s.
ZNF24	E1B7S7	5	-0.0445004	0.80137	n.s.
ZNF768	A0AAA9SLZ9;G3N1X6	2	0.943767	0.272871	n.s.
PARP4	A0AAA9T1A4	10	0.514734	0.0104113	n.s.
RANGAP1	F1MFD5	19	-0.00541925	0.944662	n.s.
G3BP2	F6R199	10	-0.0334554	0.723476	n.s.
NFIX	A0A3Q1MIF8	5	0.306274	0.137532	n.s.
SRSF7	Q3T106;A0AAF6ZBD7	7	0.120225	0.188596	n.s.
NAA20	E1B843	3	-0.182572	0.416691	n.s.
FOLH1	F1MUP1	3	0.22907	0.732997	n.s.
CLASP2	A0AAA9SFG5	32	0.0780504	0.504905	n.s.
TP53I3	A0AAF6DM90	3	0.600795	0.259144	n.s.
VIPAS39	A0A3Q1M8C6;A5D796	11	-0.0275762	0.631433	n.s.
ESD	A0A3Q1MAU7;Q08E20	11	-0.277164	0.0587601	n.s.
TGFBRAP1	A0AAA9TU88;A7MB11	6	-0.107275	0.362078	n.s.
ZNF384	F1MGZ7	6	-0.0918441	0.572956	n.s.
RGL2	F6RVL5	9	-0.0814552	0.510994	n.s.
ACOX1	Q3SZP5;A0AAA9S704	20	-0.0499916	0.787619	n.s.
TFRC	A0AAA9U1C1	15	0.286363	0.636184	n.s.
RTCA	Q2HJ88	9	-0.322813	0.0241068	n.s.
HSD17B12	F6RBM0;Q5E9H7	15	0.0740886	0.844077	n.s.
RRP12	A0A3Q1M070	16	0.246837	0.0329792	n.s.
BCR	A0A3Q1M4M7	10	-0.0924306	0.412402	n.s.
DDI2	A0AAA9S0B0	13	-0.00684595	0.927112	n.s.
FAM234A	A0AAF7A8K4;Q2HJE5	10	-0.104071	0.685538	n.s.
ROCK2	A0A3Q1MW77;Q28021	29	0.186918	0.081772	n.s.
MRPL28	A0A452DJJ7;Q2HJJ1	3	0.492166	0.061434	n.s.
UPF2	F1MQ83	20	0.0350852	0.670322	n.s.
ARAP1	F1MHU2	25	0.0835438	0.539964	n.s.
NADSYN1	Q3ZBF0;A0AAF7AU01	15	0.143147	0.182445	n.s.
ABCC3	F1N3Y6	21	-0.236819	0.573502	n.s.
VWF	A0A3Q1LLU1;P80012	45	0.79003	0.00521407	n.s.
KIF1A	A0A3Q1M6P0	15	-0.152036	0.403034	n.s.
PSME2	Q5E9G3	12	-0.33743	0.00721404	n.s.
OAT	F1MYG0;Q3ZCF5	12	0.647643	0.029641	n.s.
IGFBP7	F1MPP2	8	0.484276	0.0719329	n.s.
ALDOA	A0A3Q1NGQ6	4	0.00561953	0.960981	n.s.
PCNP	A0A452DIL1;Q32PF3	6	-0.010612	0.879254	n.s.
DDX41	F6QYF9	15	-0.00489664	0.965118	n.s.
DGUOK	Q2KIN2	5	-0.357148	0.0699592	n.s.
NFKB1	F1MKW9	16	0.037312	0.674577	n.s.
TRADD	Q2KI74	7	-0.132443	0.16563	n.s.
UBR1	E1BIW0	24	0.207582	0.175617	n.s.
DDAH2	Q3SX44	10	-0.136385	0.0271988	n.s.
MDH2	Q32LG3;A0AAF6YTP4	14	-0.283489	0.163844	n.s.
RPLP0	Q95140;F1MDN4	7	0.114129	0.288756	n.s.
WLS	A0AAA9SG68	4	0.00506568	0.990096	n.s.
CEBPD	O02756	3	-0.237924	0.198468	n.s.
COMMD5	Q5E9K1	4	0.135349	0.158071	n.s.
XXYLT1	Q1RMU6	5	-0.140888	0.6387	n.s.
NFKB2	A0AAA9T421	15	0.147259	0.267648	n.s.
VPS52	E1BDC9	11	0.133542	0.0621794	n.s.
DHODH	A0AAA9TN03;Q5E9W3	16	-0.468142	0.15445	n.s.
SLAIN2	Q3MHV6	10	0.0175443	0.778178	n.s.
GLB1	Q58D55;A0A3Q1NDQ7	13	0.0253286	0.798788	n.s.
OBSL1	E1BNH9	3	0.810775	0.0226606	n.s.
SNX15	Q148E7;A0AAA9SYI5	5	0.0112276	0.877054	n.s.
TXNL1	A0AAA9SQ31	15	0.125518	0.0908444	n.s.
YARS1	Q29465;F1MHM5	29	-0.467839	0.0153349	n.s.
SLC5A1	F1MD24	4	-0.746329	0.162256	n.s.
DMXL1	A0A3Q1NC20	13	-0.00531101	0.949374	n.s.
NEU1	A6BMK7	10	0.388136	0.329945	n.s.
KDM1B	A0A3Q1LGR3	2	0.280598	0.249384	n.s.
CDC42EP4	A0A3Q1MPX4	9	0.172218	0.298823	n.s.
ZNF512	A4FV61;A0AAF6ZBL8	16	0.110326	0.343449	n.s.
OPLAH	A0A3Q1LQE0;Q75WB5	21	0.318592	0.138122	n.s.
SCRIB	A0A3Q1LUY1	23	-0.0406873	0.539355	n.s.
EMILIN2	A0A3Q1LL18	22	1.12476	0.144101	n.s.
MAMDC2	A0AAA9S1R1	17	0.0944443	0.74382	n.s.
TTC7B	A0A3Q1MGB6	8	-0.0630777	0.602462	n.s.
ETFB	Q2TBV3	9	-0.243343	0.122688	n.s.
HDGF	Q9XSK7	15	-0.175781	0.379606	n.s.
C3H1orf50	A0AAA9S6E2	7	-0.0551429	0.564734	n.s.
TM9SF1	F1MCZ2;A4IFE9	4	-0.0662966	0.814518	n.s.
CTH	Q58DW2;E1BNH2;A0A3Q1M2L1	5	0.227036	0.65112	n.s.
CARM1	A0A3Q1MWG1	9	0.078027	0.635165	n.s.
YBX3	A0A3Q1LIJ0	5	0.071799	0.644136	n.s.
PXN	A0AAA9SQ71	13	0.246223	0.0352946	n.s.
HARS1	A0AAA9U239;Q2KI84	9	-0.198712	0.0265802	n.s.
RAB11FIP1	A0A3Q1N1R3	7	-0.343202	0.0977839	n.s.
GPT2	A0AAA9TCH2	22	-0.488603	0.17129	n.s.
NME7	Q5E9Y9;A0AAA9U2I0	8	0.208826	0.0889647	n.s.
STAM	A0AAA9SD62	8	0.0825906	0.309871	n.s.
MRPL58	Q3T116	3	0.356788	0.206627	n.s.
RPS18	A0A3Q1MQW8;Q3T0R1	6	0.16061	0.381835	n.s.
NCAM1	A0A3Q1MGY6;P31836	9	-0.374773	0.163413	n.s.
SORBS1	A0AAA9TFD0	23	0.159129	0.365203	n.s.
ECPAS	A0A3Q1LRQ5	40	-0.202714	0.200264	n.s.
CASZ1	F1N4I0	19	-0.134372	0.385667	n.s.
GOLGA2	A0A3Q1LTM9	23	0.0437465	0.653924	n.s.
ACBD5	A0A3Q1MY50;P07106	11	-0.367758	0.104688	n.s.
MANBA	A0A3S5ZPJ9;Q29444	19	0.0108583	0.978572	n.s.
UCKL1	E1BP85	8	0.072891	0.614345	n.s.
KIDINS220	A0A3Q1MAP2	5	-0.304423	0.433044	n.s.
MSH6	E1B9Q4	37	-0.0863428	0.260112	n.s.
ZNF638	A0AAA9TB71	38	0.094595	0.175722	n.s.
DNAJC11	Q2NL21;A0AAA9RZQ8	14	-0.11734	0.73698	n.s.
USP7	A0AAA9S7W6	39	0.0543046	0.554555	n.s.
XIAP	G3MWG5	15	-0.286857	0.00370978	n.s.
BUD23	Q58DP0;A0A452DIR9	4	0.066896	0.678359	n.s.
METTL9	Q0VCJ8;A0AAA9STE5	5	0.171068	0.243995	n.s.
NAT10	F1MPG7	20	0.0147178	0.950483	n.s.
PTPN6	A0A3Q1M739;F1N376	20	-0.312211	0.0340131	n.s.
BIRC2	A0A3Q1N402	6	-0.104479	0.177783	n.s.
DENND2B	A5D7B4	4	0.0194731	0.953737	n.s.
SYNGR1	A0AAA9TPD3	2	-0.0654011	0.796267	n.s.
PAXBP1	F1MBJ4	13	0.0456553	0.631136	n.s.
KLF4	A0A3S5ZPR3	2	-0.372595	0.359943	n.s.
LRRFIP1	A0A3Q1MQF7	20	-0.200622	0.0851463	n.s.
EIF2S3	Q2KHU8;A0A3Q1M1J7	14	-0.0949359	0.156237	n.s.
POLR1G	F6QVL1	4	0.148968	0.309206	n.s.
COL3A1	Q08E14;P04258	14	0.208751	0.733471	n.s.
XPO5	A0A3Q1ME79	27	0.0593266	0.111015	n.s.
PRPF38B	G3N166	9	-0.145471	0.119804	n.s.
PPTC7	E1BEW5	9	-0.236767	0.472701	n.s.
SPCS2	E1BEI2	5	-0.0177994	0.924592	n.s.
AFG2A	A0AAA9RXI8	7	0.0378537	0.867084	n.s.
CLIC6	E1BAI4;G3N3V2	6	-0.243726	0.458004	n.s.
INPPL1	E1BBJ7	28	-0.0559359	0.613813	n.s.
TRAPPC4	Q2TBL9	8	-0.216522	0.0469815	n.s.
GCLC	A0A3Q1MN33	28	-0.450293	0.0234021	n.s.
SMTN	A0A3Q1MVI3	14	0.875937	0.0946319	n.s.
PSMB1	G5E589;Q2TBX6	9	-0.107752	0.108994	n.s.
SMARCC2	F1N4N6	24	0.00928831	0.937268	n.s.
LMF2	A1L504;A0AAA9RV78	4	-0.656664	0.382833	n.s.
ARMC6	A0A3Q1NCV1	4	0.116984	0.167909	n.s.
SMARCC1	G3N0H4	6	-0.0189755	0.907682	n.s.
RPA1	Q0VCV0	25	-0.030283	0.841174	n.s.
SCIN	Q28046;F1MCZ3	20	0.0882139	0.649652	n.s.
SCCPDH	Q3T067;F1MX05	7	-0.290796	0.390261	n.s.
ASMTL	G3MY50	9	-0.0196412	0.899168	n.s.
HCFC1	E1BGF3	34	0.0501928	0.657681	n.s.
CXHXorf38	G3X6Y2	5	-0.602581	0.0135047	n.s.
CYBC1	Q3SZM3	2	-0.485942	0.194217	n.s.
GAA	A0AAF6Z2G3;Q9MYM4	19	0.0130258	0.94758	n.s.
CTSB	P07688	14	-0.053256	0.681407	n.s.
YARS2	A5D7G0	7	-0.0137143	0.924771	n.s.
PAM16	F2Z4I9	3	0.436029	0.359296	n.s.
ENPP5	F1N5W4	10	-0.499645	0.0944142	n.s.
FBP1	Q3SZB7	15	0.0173099	0.983141	n.s.
CLIC5	F1MIH4;P35526	10	0.0771027	0.591743	n.s.
PLVAP	Q3ZC85	3	0.214376	0.56108	n.s.
PDZD8	E1BPC2	13	-0.0477145	0.815769	n.s.
SON	F1MYN8	27	-0.00772238	0.945139	n.s.
MCM4	E1BFZ9	17	0.392553	0.193986	n.s.
APPL2	A0A3Q1MJZ3	30	-0.218876	0.271586	n.s.
NCDN	Q2KJ97	17	-0.50459	0.0927502	n.s.
MACF1	A0AAA9T0L5	121	0.102379	0.259461	n.s.
RIOK3	Q1RMT7	2	-0.0442841	0.682557	n.s.
AHCY	Q3MHL4	23	-0.18654	0.197614	n.s.
CUL1	A0A3Q1M2H6	21	0.00682592	0.918177	n.s.
WAS	A0AAA9SG65	2	-0.535267	0.00258129	n.s.
RRBP1	F1MDC1	29	0.112353	0.374176	n.s.
SMIM20	F1MDB2	2	0.0760779	0.855807	n.s.
SFXN3	A0AAA9TWW9;A6QP55	2	0.218451	0.791899	n.s.
MCM2	A0AAA9SSL6	18	0.394455	0.280871	n.s.
RPL10A	Q5E9E6;G3X7N2;A0AAF6Z704	8	0.0106959	0.89737	n.s.
TRIM56	A0AAA9SZH9;E1BD59	17	-0.348059	0.00239424	n.s.
DPP8	F1N1L4	10	-0.123107	0.202567	n.s.
DPP9	A0AAA9TGY1	10	-0.0414019	0.703595	n.s.
MAN2A2	A0A3Q1LI72	11	-0.126847	0.650023	n.s.
NAALADL2	A0AAA9TUG4	10	-0.192923	0.341208	n.s.
CALB1	P04467	9	-0.669299	0.336983	n.s.
IBA57	E1BC94	7	-0.309705	0.0978394	n.s.
RANBP10	F1MSI0;A3KMV8	9	-0.142558	0.132114	n.s.
ACADVL	P48818;A0AAA9SJ11	26	-0.0708771	0.776066	n.s.
CCAR1	Q17R04	23	0.0297375	0.717727	n.s.
PGLYRP2	E1BH94	12	-0.334886	0.228696	n.s.
DGCR8	A6QR44	2	0.440538	0.0725206	n.s.
VPS33B	Q2HJ18;A0AAF6YGW2	17	0.0168657	0.84566	n.s.
TCIRG1	Q1RMS1	5	0.211005	0.739018	n.s.
SGK3	F1MSV4	2	0.670713	0.263009	n.s.
SH3PXD2B	A0A3Q1LVH9	14	0.191234	0.114368	n.s.
CP	F1N076;A0AAA9T0U0	47	-0.412459	0.124182	n.s.
PDZD11	Q32LE7	5	-0.270172	0.0340675	n.s.
TOM1	Q5BIP4	22	-0.117424	0.544809	n.s.
PEX16	Q2KII7;A0A3Q1NJR3	4	0.207073	0.511731	n.s.
MOCS1	A0AAA9SB64;Q1JQD7	5	-0.428655	0.0559183	n.s.
ATL2	A0A3Q1LP31	7	-0.201775	0.226953	n.s.
PRPSAP1	A0AAF6ZDQ7;Q08DW2	12	-0.301696	0.00573385	n.s.
PRPSAP2	A2VDS0	6	0.0589571	0.75691	n.s.
ATP5PD	P13620	11	-0.178484	0.629352	n.s.
SNTB2	F6QN89	16	0.260327	0.130344	n.s.
DPT	P19427	6	0.35625	0.264726	n.s.
GSTK1	A0AAA9TW47	8	-0.187524	0.370079	n.s.
ACMSD	Q0II68	12	-0.578625	0.0892815	n.s.
PDPK1	A0AAA9TJF9	13	0.18763	0.399327	n.s.
RPL7	A0A3Q1LP69;Q58DT1;A0AAA9SNT9;A0AAF6Z7G1;A0A3Q1LKR0;F1N7A3	12	0.153383	0.4697	n.s.
SLK	A0AAA9TNL3	23	0.00666451	0.965282	n.s.
RPL22	A0AAA9SFF8	3	-0.235732	0.0608354	n.s.
PLEKHA2	Q3ZBA3	6	0.277414	0.0992891	n.s.
NF1	A0AAA9TGB2	16	0.296306	0.044907	n.s.
EFEMP2	A0A3Q1MN12	10	0.292031	0.0725519	n.s.
MED14	G3X6Y3	12	-0.0716698	0.550806	n.s.
VPS4B	Q0VD48	12	-0.0319967	0.555783	n.s.
BICRA	F1N0G2	2	0.799131	0.00502735	n.s.
CABIN1	G3X746	5	-0.0494468	0.685638	n.s.
OGFRL1	F1N3J9	4	0.155468	0.620413	n.s.
LTBP4	A0AAA9T4E5	11	-0.0287721	0.726069	n.s.
ATP5MK	A0A3Q1ML84;Q3ZBI7	4	-0.0594506	0.892067	n.s.
ZC3H18	G3MX37	8	0.171584	0.127306	n.s.
TEX10	A0A3Q1M1K0	18	-0.200458	0.0706639	n.s.
STK26	A0A3Q1MJL8	3	-0.106853	0.645379	n.s.
SMG9	Q2YDD2;F1MBJ5	4	0.390065	0.355844	n.s.
BYSL	Q5E9N0	12	0.0270419	0.784673	n.s.
SRC	E1BIM8	9	0.335291	0.0114961	n.s.
NIPSNAP1	Q0P5K8	9	-0.0947952	0.497132	n.s.
HS1BP3	A0A3Q1LSP6	12	0.087007	0.243032	n.s.
ZBTB20	F1MDT4	10	0.630329	0.0338274	n.s.
FAM83H	A0A3Q1M4P9	10	-0.139318	0.235778	n.s.
RPIA	G5E534;Q3T186	7	-0.272998	0.260441	n.s.
BHMT	Q5I597;A0A452DHV7	2	-0.478475	0.560597	n.s.
MRPL11	A0AAA9RV64;Q2YDI0	7	0.0187833	0.940606	n.s.
PGD	A0A3S5ZPM3	22	-0.125168	0.155618	n.s.
CNN2	Q3SYU6	8	0.38803	0.00971232	n.s.
SLC29A1	F6PZI3	4	-0.984592	0.0197203	n.s.
DCP1A	F1N4I7	10	0.391259	0.038152	n.s.
BCAS1	A0A3Q1LQB6	16	0.27571	0.476673	n.s.
LZTS2	A5PKL7;F1MY71	6	-0.152819	0.114955	n.s.
HOOK2	A0AAA9SN40	6	-0.0632117	0.708979	n.s.
MRC2	A0A3Q1M5H7	25	0.350078	0.074213	n.s.
C1H3orf33	E1B722	3	-1.65152	0.197369	n.s.
TBC1D24	Q29RJ2;A0A3Q1MCN9	11	-0.101113	0.481651	n.s.
ZFYVE26	A0A452DJ92;E1BLZ4	10	0.149593	0.21034	n.s.
CNN3	Q32L92	11	0.135808	0.0332091	n.s.
AAK1	F1MH24;A0A3Q1LT42	29	-0.00541973	0.962071	n.s.
ALG9	A0AAA9TM73	7	0.035902	0.871545	n.s.
MYD88	A0A452DHW6;Q599T9	7	0.198506	0.0138122	n.s.
SELENOO	G3X686	9	-0.0462644	0.710476	n.s.
MISP3	F1N705	2	0.955709	0.274451	n.s.
CEP170B	G3X6H0	6	0.109479	0.564086	n.s.
MYO6	E1BPK6	49	-0.118453	0.606147	n.s.
LAD1	A0A3S5ZP82	10	-0.386653	0.0120899	n.s.
NHERF2	G3N1L5	13	0.0203614	0.908233	n.s.
RSF1	A0A3Q1LP30	12	0.0779848	0.421707	n.s.
STT3B	A5D7G6	11	0.1134	0.708185	n.s.
SLC5A6	F1MN65	3	-0.914074	0.096784	n.s.
HID1	A0AAF6DLN3	16	0.11403	0.551224	n.s.
BAG6	A0AAA9S5L9	18	0.0638342	0.428565	n.s.
KRI1	Q0V8M0	5	0.196821	0.361539	n.s.
OSTF1	Q8MJ50	9	-0.0140028	0.91872	n.s.
FMNL1	F1MGX4	10	-0.0459609	0.709153	n.s.
PTPN1	A0AAA9TFV5	16	0.219724	0.525498	n.s.
PALM3	A0A3Q1LZW1	13	-0.0670993	0.648814	n.s.
MRPL41	A5PJ71	4	-0.453909	0.166956	n.s.
BAZ1B	E1B6X6	28	0.160125	0.173497	n.s.
FRMD8	F6QQB6	5	0.0103981	0.944532	n.s.
PHGDH	A0A140T866;Q5EAD2	29	-0.386964	0.119175	n.s.
PHF3	A0AAA9T2E9	15	-0.119767	0.368055	n.s.
CERS2	A0AAA9TYA9;Q3ZBF8	6	0.0606949	0.810281	n.s.
ITGAV	P80746;A0A3Q1MXS2	19	-0.205359	0.294587	n.s.
CORO2A	Q32LP9;A0AAA9TQU6	11	-0.223665	0.214103	n.s.
NUP160	F1MZR0	32	0.100355	0.460986	n.s.
TTC9C	A0AAA9RWC7;E1BJN0;A4IFF3	4	-0.473113	0.0621509	n.s.
NFRKB	F1MPR9	6	0.114851	0.476849	n.s.
NAGK	A0A452DJF8;Q3SZM9	7	-0.313126	0.221832	n.s.
GDPGP1	Q5E9T1	11	-0.267385	0.0871804	n.s.
RNASEH1	F1N2X2	3	0.330686	0.370071	n.s.
AP5B1	G3MZC5	8	-0.070158	0.612573	n.s.
PDZK1	Q3T0X8;A0A452DI72	14	0.0761304	0.646283	n.s.
MPPE1	A0A3Q1MCX7	3	0.39998	0.305319	n.s.
ATP6V0D1	A0AAF6Z0J8;P61420	7	0.124887	0.470543	n.s.
RTRAF	Q3T0S7	10	0.101774	0.46862	n.s.
ERICH3	A0AAA9T0X5	10	-0.209715	0.0603077	n.s.
PDCD6	A0AAA9T4F5	5	0.0444374	0.459867	n.s.
ABCD1	Q2KJ57	12	-0.206013	0.612939	n.s.
RPL7A	Q2TBQ5;A0AAA9S7M5	13	-0.0866494	0.395763	n.s.
EIF2B4	Q3T058;A0A3Q1LPP5	9	0.057312	0.454651	n.s.
PAF1	Q2KJ14	11	-0.102485	0.40466	n.s.
ESYT2	A0AAA9SS32	20	-0.188005	0.161486	n.s.
THAP11	A5PKF5	3	0.468226	0.0501667	n.s.
CPOX	E1BKY9	20	-0.339033	0.0477752	n.s.
ELAPOR1	A0AAA9SZ40	20	-0.111214	0.682303	n.s.
STARD10	F1MXU5	8	-0.0458634	0.857548	n.s.
CGN1	P23805;E1BEZ9	6	-0.106547	0.697848	n.s.
PGS1	A0AAA9T2G4;Q2KJ28	8	-0.345309	0.317219	n.s.
ACTR5	A0AAA9SR01	5	0.0991554	0.407992	n.s.
MFN2	D7GLD0	16	-0.235836	0.375104	n.s.
PFN1	P02584;E1BHJ0	10	0.0807347	0.559819	n.s.
PTGIS	Q29626;A0AAF6Z3X9	12	0.0203118	0.935735	n.s.
NDUFA10	P34942;A0AAA9SAR7	11	-0.110866	0.700172	n.s.
SEC23B	Q3SZN2	21	0.1456	0.0193861	n.s.
KANK2	Q1LZH7	22	0.548362	0.0298339	n.s.
ZFR	F1N0Y9;A0A3Q1MI58	22	0.0480227	0.669864	n.s.
KANK1	F1N1B8	2	-0.215813	0.550142	n.s.
FXR2	A0A3Q1MDB8	11	-0.0761585	0.364925	n.s.
AIP	A0A3S5ZP93;Q7YRC1	11	0.222669	0.0175921	n.s.
ARHGAP1	F6RWK1	16	0.266116	0.00563089	n.s.
LAMB3	F1MMK1	6	0.219677	0.594913	n.s.
EIF2B3	A0AAF6DMG9;A5PJI7	13	0.0637474	0.627256	n.s.
CSTF1	A0JN63	8	0.00523782	0.947507	n.s.
WDR1	Q2KJH4;F1MTP5	23	-0.021502	0.794127	n.s.
PREB	A0AAA9RV38	15	-0.223532	0.441013	n.s.
FAH	A5PKH3;F1MYZ7	11	-0.449673	0.132494	n.s.
CCT8	Q3ZCI9;G3X861	30	-0.0397487	0.302853	n.s.
SKIC2	A0AAA9SE27	29	0.214114	0.0306676	n.s.
GCLM	Q2T9Y6	10	-0.0209177	0.887247	n.s.
PALS1	E1BIQ8	8	0.297388	0.144464	n.s.
AP1M1	Q2KJ81	8	0.0474136	0.636824	n.s.
AP1M2	A0A3Q1LWL6;Q3SYW1	12	-0.0631289	0.590851	n.s.
FAM169A	F1N5F9	14	-0.510419	0.0526655	n.s.
CAPN7	E1BIX3	15	0.189282	0.206082	n.s.
FARSB	A0AAA9SPL5	18	0.00921202	0.778774	n.s.
ATP5F1B	A0A452DII8;P00829	23	-0.172185	0.367495	n.s.
HDHD3	Q5E9D6;A0A452DHL8	12	-0.470189	0.014264	n.s.
HNF1B	F1MK03	8	-0.251686	0.347088	n.s.
MITF	A0AAA9SVL5	3	-0.0875704	0.831501	n.s.
SYK	A0A3Q1MHG9	3	-0.468282	0.0448537	n.s.
ITIH2	A0AAA9RW75	19	-0.774009	0.137234	n.s.
CLTC	P49951;A0AAA9SF14	76	-0.0496383	0.629326	n.s.
SSC5D	A0A3Q1MT81	5	0.632362	0.00716293	n.s.
MOV10	Q0V8H6;A0AAF6YZT3	29	-0.146239	0.271238	n.s.
ADSS2	A7MBG0	13	-0.342737	0.0645698	n.s.
VPS39	A0AAA9TAD1	22	-0.0843754	0.449834	n.s.
CLASRP	A0JNI5;A0A3Q1MSZ6	3	0.0285671	0.89207	n.s.
CEP128	A0AAA9TFT1	4	-0.00694394	0.971	n.s.
VTI1A	A0AAA9S2Q2	3	0.373783	0.55584	n.s.
RPL3	A0AAF6YKW6;P39872	11	-0.124009	0.305684	n.s.
SPICE1	Q2T9X8;F1MIU6	8	0.130322	0.488012	n.s.
RBM10	A0A3Q1M366	11	0.0343118	0.706407	n.s.
CFAP161	F6RJC2	4	0.0329905	0.802959	n.s.
PABPC4	F6RN21	14	-0.0101013	0.939433	n.s.
ANXA11	A0AAA9SWE4;P27214;A0AAA9U0R7	15	0.232481	0.0321445	n.s.
ADSS1	A5PJR4;A0AAF6ZFA7	11	-0.277623	0.0136412	n.s.
GMPPA	A0A3Q1LUY6	15	0.000147343	0.999388	n.s.
CHMP3	Q58CS7	4	0.141258	0.313662	n.s.
COL4A2	F1N7Q7;Q7SIB3	6	0.411607	0.475793	n.s.
LOC616948	Q3MJK3;A0A3Q1LM24	8	-0.87542	0.0305634	n.s.
LOC522479	A0A3Q1LTS9	8	0.91796	0.389979	n.s.
GPX1	P00435	12	0.234393	0.111308	n.s.
FAF2	Q2HJD0	12	-0.106037	0.725242	n.s.
LAMA5	A0A3Q1MA79	29	0.368099	0.374474	n.s.
PPP6C	Q2KIC7	7	-0.137999	0.264676	n.s.
PPP4C	A6H772	6	-0.122934	0.369369	n.s.
MGST3	Q3T100	4	-0.355749	0.332923	n.s.
SIKE1	Q0VCF3;A0AAA9RW05	7	-0.0213764	0.741369	n.s.
BSPRY	F1MKU3	13	-0.0549183	0.685632	n.s.
PROS1	A0AAF6ZAV2;P07224	14	-0.452767	0.163359	n.s.
DENND4C	F1N032	19	-0.0546706	0.492992	n.s.
WDR77	Q5E9I7	8	-0.0491121	0.598265	n.s.
SIPA1L3	A0A3Q1MMG4	11	-0.296956	0.0175396	n.s.
STIM1	A0AAA9SQQ0;Q58CP9	11	-0.0168829	0.932414	n.s.
STRIP1	Q0P5J8;A0A3Q1MT54	5	-0.0565176	0.505468	n.s.
CST6	Q5DPW9	8	-0.132921	0.677497	n.s.
COPS2	G3X736	14	-0.136016	0.176306	n.s.
HSD17B11	Q2KIS5	6	-0.229619	0.123425	n.s.
GGACT	A0AAF7A0Y9;Q0VFX9	6	-0.169914	0.294854	n.s.
SEC23IP	E1BKW5	24	0.0308561	0.588959	n.s.
DIP2A	F1MPW1	15	-0.135366	0.364438	n.s.
ZNHIT2	Q2TBW5	3	0.114196	0.455364	n.s.
CAD	F1MVC0	45	0.290881	0.0214963	n.s.
MT-ND4	P03910	2	0.18265	0.641587	n.s.
SMCHD1	F6RF21	41	-0.0039649	0.96279	n.s.
CAPG	Q865V6	13	0.000647545	0.998125	n.s.
POLR1B	A0AAF6DM82	10	0.133599	0.151449	n.s.
RAD21	Q3SWX9	18	-0.0981951	0.173631	n.s.
PRDX2	Q9BGI3;A0AAA9RUA3	11	0.205661	0.0615261	n.s.
VCP	G3X757;Q3ZBT1	44	0.0603614	0.524521	n.s.
CTNNA1	Q3MHM6;A0A3Q1M9M0	29	-0.0885458	0.575952	n.s.
KLC4	F1MWR7;Q2HJJ0	15	0.00388956	0.940219	n.s.
DOCK6	E1BK77	20	0.00671196	0.945082	n.s.
NCBP2AS2	A0A3Q1NMJ3	2	-1.15191	0.222399	n.s.
GSS	Q5EAC2;A0A140T850	12	-0.154153	0.252269	n.s.
MCM5	Q0V8B7;A0AAA9TCV3	17	0.303051	0.344412	n.s.
SUPT6H	A0A3Q1LVF3	30	-0.0122628	0.847135	n.s.
GBP1	A0A3Q1MHZ1	8	-0.638759	0.011242	n.s.
CDA	A0AAA9TAP6	5	-0.971752	0.147554	n.s.
LARP4B	A0A3Q1LR80	12	-0.174638	0.253526	n.s.
ITPR1	A0AAA9S9T4;Q9TU34	3	0.263641	0.413916	n.s.
NR2F6	F1N3S3	9	-0.31066	2.11425e-05	n.s.
ITGA2	P53710;F1MBA3	19	-0.525754	0.167914	n.s.
LRWD1	F1N397	4	0.195003	0.205917	n.s.
AGO1	A0A3Q1MEG1	13	0.0549369	0.56942	n.s.
AGO2	Q6QME8;A0AAA9S2J2	22	-0.0198879	0.778781	n.s.
RABEP1	F1MQH8	31	-0.167883	0.503793	n.s.
NID2	F1MF97	35	0.704797	0.191616	n.s.
PFKM	Q0IIG5	10	0.27302	0.0343731	n.s.
NFIB	Q0VCL6	7	0.192209	0.26707	n.s.
WDR54	A0AAF6DMI3	6	-0.222233	0.129815	n.s.
VPS45	F1MDA6	13	-0.209251	0.00288768	n.s.
SGTA	Q32LM2	9	-0.011373	0.85493	n.s.
STAG2	G3X6R3	22	0.0130601	0.908222	n.s.
PSMC1	A4FUZ3	22	0.00882864	0.843255	n.s.
ANKFY1	F1MD79	18	-0.241597	0.205606	n.s.
GALNS	A0AAA9U1E9	7	-0.181382	0.348721	n.s.
ST13	A7E3S8;A0A3Q1M4L0;A0AAA9TBE2	9	0.0294714	0.700853	n.s.
STRBP	Q08E27;A0AAF7AND0	15	0.0543966	0.561092	n.s.
SNX8	Q2KHV6	7	0.292183	0.0369396	n.s.
CLMN	E1BM27	16	-0.208984	0.163002	n.s.
ADAM10	Q10741	15	-0.564023	0.00582229	n.s.
EFR3A	A0AAA9T2Q2	4	0.0151787	0.962241	n.s.
IFT46	A0AAF6YYD2;Q1LZB4	2	0.510733	0.03044	n.s.
FLYWCH2	E1BBK3	2	-0.153414	0.337471	n.s.
ATP7A	A0A3Q1ML70	8	-0.0630431	0.524897	n.s.
RBM14	F1MI47;Q5EA36	18	0.141524	0.144424	n.s.
SYNCRIP	F1MCT8	18	-0.0625787	0.168979	n.s.
DHCR7	Q5E9J5	4	0.242839	0.352643	n.s.
SAFB	A0AAA9TEU1;A0AAF6DM79	17	-0.10137	0.21139	n.s.
SMARCA2	A5PKK5	11	0.298433	0.123092	n.s.
C9	Q3MHN2	19	-0.31084	0.368838	n.s.
MATN2	A5D7D5	14	0.650973	0.00219253	n.s.
DIS3	F1N1R4	23	0.123563	0.131238	n.s.
STMN1	Q3T0C7;F1N1C2	5	0.0187311	0.935763	n.s.
LARP7	A0A3Q1LP50	19	-0.042695	0.756801	n.s.
RMDN2	Q2TBQ7	4	-0.0869017	0.532695	n.s.
UAP1	F1MJP7	17	-0.204186	0.13023	n.s.
FGFR1OP2	E1BBF9	4	-0.476468	0.0173646	n.s.
NOSTRIN	Q2KJB5;F1MKH2	10	0.0628257	0.782818	n.s.
SRP72	E1BB38	21	-0.159534	0.0397545	n.s.
STX4	A0A452DIB2;Q3SWZ3	5	-0.085743	0.552716	n.s.
AP1S1	Q1JQ98	3	0.0782981	0.761718	n.s.
VPS16	F1MQ47;Q5E9L7	16	0.175004	0.0143535	n.s.
NIT1	Q32LH4;A0AAA9RRT9	8	-0.145931	0.228988	n.s.
GTF3C3	A0A3Q1M0Z5	5	-0.0359819	0.789275	n.s.
CCM2	E1B8H2	8	-0.194508	0.0872999	n.s.
GNPTG	Q58CS8;A0AAA9S597	2	-0.225339	0.369748	n.s.
UTP6	F6R8I1	9	0.0965393	0.475338	n.s.
TOR1B	F1MBM5	5	-0.298184	0.222325	n.s.
CORO1C	A0AAA9SY31	12	-0.078752	0.731781	n.s.
LOC534913	A0AAA9SND9	8	-0.703564	0.0510267	n.s.
ACOX3	A4IFA4	7	-0.274199	0.396691	n.s.
TCP11L1	A0A3Q1LT06	2	-0.17118	0.634359	n.s.
PPM1G	P79126	9	0.000159264	0.99768	n.s.
YLPM1	E1BGC5	25	0.0621116	0.597689	n.s.
PGM1	Q08DP0;F1MJS4	19	-0.0188527	0.791754	n.s.
SEPTIN3	A0AAA9SQ79;Q08DM7	5	0.408813	0.176325	n.s.
TNKS1BP1	A0A3Q1N4H7	43	0.0642104	0.524419	n.s.
DENND4B	A0AAA9S3D2	2	-0.154885	0.292226	n.s.
MTREX	A0AAF6DLQ5	26	-0.0408988	0.471457	n.s.
PRG4	G3MYM8	6	-0.165757	0.685143	n.s.
INTS8	A5PJS8	4	0.103374	0.273303	n.s.
PSMA5	A0AAF6Z8I1;Q5E987	10	-0.0466495	0.483384	n.s.
NFS1	A0AAA9T7J9	10	-0.118159	0.424224	n.s.
IPO5	F1MPE5	33	0.01648	0.736394	n.s.
QNG1	Q1JP73;F1MEP1	15	-0.204961	0.122816	n.s.
CD9	A0AAA9RTY1;P30932	3	-0.117177	0.616532	n.s.
TNPO3	A5D7C4	20	0.0793781	0.261696	n.s.
PEX1	A0AAA9S682	8	-0.0351689	0.816459	n.s.
PSMB4	Q3T108	4	-0.165519	0.0300682	n.s.
FMNL3	A0AAA9TGU4	22	-0.0862036	0.647264	n.s.
GNL3	E1BMI6	8	0.134128	0.436012	n.s.
MEMO1	Q2HJH7;A0AAA9SKU6	9	-0.177112	0.0645586	n.s.
AEBP1	F1N1C7	20	0.37248	0.037997	n.s.
HOOK3	E1B7Q0	12	0.0726097	0.66232	n.s.
CPD	E1BLR9	13	0.127798	0.556314	n.s.
FDFT1	Q32KR6;A0AAA9TVZ3	19	-0.299744	0.294709	n.s.
RPS7	A6H769	5	0.108351	0.528081	n.s.
DNMT1	Q24K09;F2Z4J5	16	0.0802064	0.429252	n.s.
RXRB	A0AAF6DMC7	5	-0.0627446	0.709416	n.s.
GAK	F1MIB2	19	0.0104356	0.921787	n.s.
SPG11	F1MEB4	14	0.269466	0.0182109	n.s.
EIF5B	F1N6Y7	23	0.0427527	0.653321	n.s.
ADHFE1	A6QP15	6	-0.790742	0.0772944	n.s.
OS9	Q3MHX6;F1MX65	11	-0.273867	0.14211	n.s.
MCM3	A4FUD9;A0AAF6YVB0	18	0.414207	0.214402	n.s.
TBC1D10A	F1MB46	7	0.158207	0.176123	n.s.
NSMCE1	Q3T0X7;A0A3Q1MQS1	2	0.215294	0.705864	n.s.
FGF2	A0AAF6YP72;P03969	5	-0.104556	0.519574	n.s.
COPZ1	A0AAF6YNH6;P35604	6	-0.332247	0.0373668	n.s.
CYB5R1	Q3MHW9	9	0.118351	0.752481	n.s.
TTC27	Q17QZ7;A0AAA9SPB9	13	-0.141494	0.271305	n.s.
LTA4H	Q3SZH7	23	-0.173421	0.085863	n.s.
PUS7	F1ML88;Q08DI8	7	0.0492983	0.663668	n.s.
TBC1D1	O97790	3	-0.790029	0.0435619	n.s.
HK1	A0A3S5ZPF0;P27595	23	0.0693259	0.761374	n.s.
SMC5	F1MPW4	5	0.0041244	0.970884	n.s.
STAT3	F1MX38;P61635	30	-0.0837932	0.467361	n.s.
RDH10	Q8HZT6	12	-0.436048	0.361605	n.s.
ARL1	Q2YDM1	7	-0.01794	0.729185	n.s.
SMS	Q3SZA5	20	0.109257	0.714754	n.s.
CYB5R3	P07514;A0A3Q1LZ18	16	-0.121647	0.540621	n.s.
ATE1	A0AAA9SIF0	15	0.0306349	0.768266	n.s.
RIBC2	Q32LJ7;A0AAF6YL38	5	-0.177845	0.108489	n.s.
ASAP2	A0A3Q1M154	15	-0.190092	0.182141	n.s.
ZER1	F1MJP6	7	-0.159085	0.151172	n.s.
DOCK5	A0A3Q1MC59	12	-0.0310588	0.886338	n.s.
PSMA6	Q2YDE4;A0AAA9S278	13	-0.121747	0.184009	n.s.
KHSRP	A0A3Q1NE05	23	0.191904	0.10854	n.s.
DOCK1	F1MIX6	33	0.110872	0.0566096	n.s.
PDCD10	Q0VCQ6	8	-0.112625	0.112063	n.s.
UBAP2L	A0AAA9TFY7	12	0.219038	0.14624	n.s.
INHCA	A0A3Q1MUV9	35	-0.378255	0.210367	n.s.
ZFAND6	Q3SZY7	3	0.306947	0.319505	n.s.
PDIA5	A0AAA9RXH7;Q2KIL5	17	0.134687	0.068019	n.s.
EDF1	Q3T0V7	4	0.023602	0.790131	n.s.
YTHDC2	F1MNU7	3	-0.368947	0.21156	n.s.
F13A1	P12260;F1MW44	14	-0.656001	0.00689584	n.s.
MERTK	F1N381	4	0.133426	0.672737	n.s.
DOHH	Q0VC53	8	-0.155782	0.334046	n.s.
DGKZ	A0AAA9SCA8	3	0.115698	0.598117	n.s.
CNOT4	A0A3Q1N546	2	0.639123	0.301373	n.s.
VPS51	A6QQ47;F1MJ84	17	-0.0722291	0.166775	n.s.
FAM3C	A5PKI3	6	-0.242345	0.25811	n.s.
TOLLIP	Q2LGB5;A0AAF6YRW2	6	-0.297874	0.0233164	n.s.
GNPAT	A4IF87;A0A3Q1LQH8	9	-0.000725985	0.998436	n.s.
FGG	F1MGU7;P12799	23	-0.459264	0.200212	n.s.
PSMD3	Q2KJ46	23	-0.00642967	0.913233	n.s.
TTC1	Q3ZBR5	9	-0.0223489	0.829327	n.s.
ATXN3	A0AAA9SGW9;A0A3Q1MF75	7	-0.534699	0.00223021	n.s.
EP400	A0AAA9U053	11	-0.203748	0.199183	n.s.
CUL4A	F1N3S4	22	-0.117829	0.153224	n.s.
UNC45A	A0AAA9T3T4	26	-0.0305552	0.68294	n.s.
DNAH9	F1MJJ0	32	-0.111732	0.446226	n.s.
MACROH2A2	Q1LZ92	14	-0.167893	0.482719	n.s.
MTA1	A0A3Q1MK17	9	0.0149508	0.880973	n.s.
PHYH	A0AAF6YRS4;O18778	9	-0.247492	0.382926	n.s.
WDR24	F1MJS7	5	0.14243	0.277964	n.s.
ICA1	A0A3Q1LSW7	6	-0.265581	0.0156138	n.s.
ZC3H14	Q3ZC82	13	0.0728512	0.484715	n.s.
TPM2	Q5KR48;A0AAA9RWG3	9	0.339659	0.182917	n.s.
ZNF259	Q2TBX0	12	-0.0821495	0.299344	n.s.
PPP2R1A	F6QI68;Q32PI5	15	-0.0361128	0.603884	n.s.
NNT	P11024	26	-0.385718	0.315796	n.s.
ARFGAP2	A1L520;A0AAA9SHG7	15	0.037353	0.604019	n.s.
POLR3A	A4IF62	8	-0.0466447	0.667793	n.s.
PDCL3	A0AAA9T5C0;Q0VCW8	6	0.528363	0.0816409	n.s.
ZYX	F6PUM3	15	0.467006	0.000660358	n.s.
TBRG4	Q3SZK4;A0AAA9S1P7	11	-0.065964	0.780666	n.s.
LOC506828	F1MJK3	51	-0.655632	0.238712	n.s.
YTHDF3	A0A3Q1LJ04	8	0.0525661	0.461805	n.s.
RABGEF1	G3X6D4;O18973	9	0.00114608	0.992606	n.s.
RFC4	A0A3Q1M190	5	0.12287	0.424592	n.s.
RPL24	Q862I1;A0AAA9TQX1	5	0.0491862	0.824352	n.s.
HNRNPL	E1BIB4	16	-0.0243444	0.813687	n.s.
PCBP2	F6RMB4	8	-0.00315237	0.955811	n.s.
PCBP1	Q5E9A3	9	0.0724568	0.345339	n.s.
GAPDH	P10096;A0A3Q1LPH5	11	-0.0764656	0.319543	n.s.
DNAH5	E1BMG2	45	-0.205671	0.186485	n.s.
PAN2	E1BML0	5	0.00670528	0.931002	n.s.
TSNAX	G3MY03	7	-0.0947275	0.391199	n.s.
SMAD2	Q1W668;E1BE92	2	0.236497	0.0341112	n.s.
SMAD3	F1MUZ3	3	-0.0127864	0.783314	n.s.
MRPS9	A0AAA9TAD0;Q58DQ5	9	0.1315	0.684023	n.s.
EIF2A	A0AAA9SB04	18	0.0137448	0.837597	n.s.
RPSA	P26452	10	0.176588	0.0398019	n.s.
COPG2	A2VE21	23	0.08025	0.506057	n.s.
AGRN	A0AAA9TR62	40	-0.68772	0.011223	n.s.
POLR2G	Q5E9B8;A0AAF6YTR5	7	-0.0353804	0.307111	n.s.
LOC511531	E1B7Z4	6	-0.725611	0.0134476	n.s.
RXRA	A0AAA9T9C1	3	0.165969	0.630415	n.s.
NR2C2	A0A3Q1LZU3	9	0.297325	0.0550435	n.s.
NR2F1	Q9TTR8	2	0.350358	0.113087	n.s.
NR2F2	Q9TTR7	4	0.254409	0.261592	n.s.
PECR	A0AAA9TYP4	7	0.303831	0.429847	n.s.
PAFAH1B3	A0AAF7ABT5;Q29460	9	-0.152024	0.280028	n.s.
YEATS2	A0AAA9SZB7	6	0.117396	0.483309	n.s.
HECTD1	E1BLD1	32	-0.078588	0.270215	n.s.
IPO9	G5E567	13	0.142671	0.242328	n.s.
SOD2	P41976;E1BHL1	5	-0.359428	0.103185	n.s.
PSMD12	A0AAF6YJJ1;Q2KJ25	16	0.012743	0.881161	n.s.
GFM1	A0AAA9TGR1	16	0.0526743	0.881939	n.s.
ATP6V0A1	Q29466;F1MJV0	8	-0.0364699	0.822578	n.s.
FNBP1L	A0A3Q1MAC0	14	-0.0652924	0.659437	n.s.
PSMB5	Q32KL2	10	0.105326	0.122997	n.s.
PHB2	Q2HJ97	14	-0.0109472	0.973802	n.s.
ADA	A0A3Q1M5V8;P56658	22	-0.351998	0.0996368	n.s.
HMOX1	Q5E9F2	13	-0.475002	0.0554562	n.s.
HMBS	Q2KIN5	9	-0.0733075	0.545021	n.s.
FERMT2	A7MB21	30	0.305399	0.0493671	n.s.
GSTT1	Q2NL00	10	-0.653054	0.256266	n.s.
EZR	P31976	20	0.154242	0.455613	n.s.
MFAP1	Q5EA98	6	0.0186238	0.905611	n.s.
FKBP5	G3MXV0	25	-0.0718694	0.676429	n.s.
EPS15L1	A0A3Q1MMI6;A0A3Q1LKG1	25	0.157378	0.116601	n.s.
HSPA5	Q0VCX2	26	0.137352	0.199216	n.s.
NXF1	Q1RMS5	16	0.121112	0.216499	n.s.
CXADR	A0A3Q1MQS2;Q8WMV3	10	-0.145979	0.493168	n.s.
AP2A2	A0A3Q1LIW3;Q0VCK5	25	0.14049	0.0813487	n.s.
CACNA2D1	A0AAA9TH89	14	-0.0307164	0.895511	n.s.
ACP1	A0AAF6Z8C2;P11064	6	-0.0945134	0.641413	n.s.
SERPINE2	Q8HZY1	11	0.638923	0.0127449	n.s.
ODR4	F1N582	9	-0.0103445	0.958226	n.s.
SAE1	A2VE14	17	0.245736	0.263169	n.s.
DOCK7	F1N3L7	36	-0.147859	0.366829	n.s.
SEC24B	E1BPR4	21	-0.0123825	0.827528	n.s.
DLST	A0A3Q1MHE5;P11179	9	-0.186469	0.533253	n.s.
RSL1D1	A4FV97	12	0.0167818	0.89581	n.s.
GFM2	A0AAF6ZIV2;A6QNM2	4	-1.12452	0.0094493	n.s.
TMEM192	E1BL89	2	0.0215154	0.967946	n.s.
PEX19	Q3SZD1	7	0.0296581	0.770757	n.s.
EGLN1	A0A3Q1M2B6	13	0.0562544	0.795046	n.s.
TCERG1	A0A3Q1NC33	23	0.0934591	0.173841	n.s.
APOA1	A0AAA9SEH0;P15497	23	-0.574046	0.0412825	n.s.
ERCC5	Q3B7N6	12	0.0940688	0.391148	n.s.
SUCLG1	F1MZ38;Q58DR8	10	-0.156316	0.522552	n.s.
DIDO1	E1BCR2	22	-0.0460894	0.644329	n.s.
CD2AP	A0A3Q1N369	23	-0.223678	0.175082	n.s.
DBI	P07107	7	-0.282909	0.0809859	n.s.
PHPT1	Q32PA4	8	-0.13821	0.128372	n.s.
NENF	Q1JQA5	6	-0.0624895	0.665789	n.s.
ARPC5	Q3SYX9;G3MXC8	6	-0.166988	0.0436942	n.s.
FCSK	A6QP44	25	0.185785	0.179858	n.s.
SRPRA	Q3MHE8	15	-0.197608	0.0930205	n.s.
PPIP5K2	A0A3Q1M2A3	10	0.169092	0.176811	n.s.
GRPEL1	Q3SZC1	10	-0.422603	0.0500474	n.s.
PPIP5K1	A7Z050;A0A452DJE6	3	-0.181532	0.47271	n.s.
SHMT1	A0A140T896;Q5E9P9	8	-0.129524	0.524042	n.s.
CRPPA	E1BCH6	6	-0.030447	0.842126	n.s.
RAP2A	E1BNQ3	2	-0.165994	0.681659	n.s.
RAP2B	A4IFU2	2	-0.299504	0.176927	n.s.
RHEB	Q56JV3;F2Z4I1	3	-0.205242	0.0570865	n.s.
NCSTN	A0A3Q1MDC6	5	-0.121596	0.376029	n.s.
ABHD10	A0AAF6YMI2;Q5E9H9	7	-0.107802	0.509937	n.s.
HSD17B14	A0AAF6YTC1;Q9MYP6	3	-0.500098	0.28116	n.s.
UACA	A0A3Q1LN88;Q8HYY4	32	0.019135	0.754254	n.s.
UHRF2	F1MFX7	8	0.00459814	0.962742	n.s.
SENP1	F1MG84	2	-1.06126	0.452785	n.s.
RNASET2	A0AAA9TWF6	7	-0.126185	0.572598	n.s.
EXOC4	A6QLD1	22	0.0171275	0.732766	n.s.
USE1	F6QDZ3	7	0.219406	0.363284	n.s.
ENOSF1	Q2KIA9	16	-0.430103	0.147571	n.s.
RAB22A	F1MHP4	4	0.180668	0.160506	n.s.
TXNDC5	A0A3Q1LUG9	15	0.0341516	0.822632	n.s.
ECHDC2	A0A452DIJ4;Q2TBT3	8	-0.719575	0.0208005	n.s.
RAP2C	Q08DI5	4	-0.1613	0.43457	n.s.
SCFD2	A0AAA9SE28	16	0.0305662	0.836914	n.s.
SMUG1	Q59I47	11	-0.118248	0.283461	n.s.
TSC22D4	E1BFH5	6	-0.141985	0.0670652	n.s.
GTF3C1	E1BNY8	14	0.250834	0.0521549	n.s.
AFG1L	E1BQ18	4	0.611627	0.223019	n.s.
ARPC5L	Q5E963	5	-0.284167	0.0114072	n.s.
CLCC1	Q1LZF8	11	-0.178495	0.315105	n.s.
CDC42BPA	F1MH45	7	0.545354	0.00158217	n.s.
XPOT	E1B8Q8	21	0.202062	0.0172898	n.s.
VKORC1L1	A0AAA9SWV9	2	-0.514295	0.0681971	n.s.
VKORC1	A0AAF6YGJ2;Q6B4J2	2	-0.154328	0.486001	n.s.
FBLN2	E1BEB4	30	1.02386	0.128611	n.s.
EIF2B1	Q0IIF2;A0AAF6YRC9	12	0.211405	0.00634624	n.s.
DMD	A0AAA9T1N8	32	0.258284	0.179793	n.s.
COL6A2	A0AAA9TXG2	23	0.0569596	0.878669	n.s.
COPG1	A0A140T886;P53620	34	-0.0901132	0.297229	n.s.
HGH1	F1MW97	7	-0.142426	0.335009	n.s.
TRIM21	Q7YRV4	14	-0.803397	0.00306423	n.s.
MAP1S	F1N1H2;A6QQ70	26	0.137019	0.354567	n.s.
TIMM10B	Q3SZW4;A0AAA9SX31	3	-0.134761	0.483438	n.s.
MTA2	F6RJB2	14	0.000580311	0.993435	n.s.
PRAF2	Q2KHX3	2	-0.147223	0.581786	n.s.
HYCC1	A0A3Q1LX28	5	0.205293	0.281495	n.s.
IKBKB	A0AAA9SIT5;Q95KV0	17	0.0891294	0.45685	n.s.
REXO2	A2VE52	7	0.277881	0.425375	n.s.
COPA	Q27954;A0A3Q1MCV5	57	-0.0349383	0.635283	n.s.
CCT3	Q3T0K2	28	-0.111255	0.0164792	n.s.
MRPL46	Q3SZ22	9	0.1585	0.603406	n.s.
ULK3	F1N332	10	0.140257	0.126993	n.s.
SEMA4D	A0A3Q1LQU8	5	-0.332836	0.126594	n.s.
PDLIM1	Q5E9E1;A6H7E3	15	0.297195	0.0055999	n.s.
AP3D1	A0AAA9ST90;Q865S1	30	0.0228829	0.712673	n.s.
APEH	P80227;A0AAA9TE85	14	-0.0173607	0.796883	n.s.
SRSF6	F1MXY9;Q3B7L6	3	0.181083	0.453687	n.s.
GAS6	A0AAA9SCN2	5	0.0600441	0.727241	n.s.
PDIA6	A0A3Q1MRD2;F6QH94	15	0.0759029	0.108073	n.s.
GCAT	A0AAA9SIL2;Q0P5L8	7	-0.331859	9.73608e-05	n.s.
ERAP1	F1MU34	27	-0.290863	0.240859	n.s.
MINDY3	Q0IIH8	2	-0.201865	0.100868	n.s.
AOC3	O46406;Q9TTK6;Q29437;A0A452DHX8	15	-0.466965	0.243202	n.s.
STK3	A0JN96	11	-0.113981	0.403928	n.s.
PTK2B	A0A3Q1LVP1	9	0.12474	0.70001	n.s.
NUP210	F1MPW7	32	-0.429469	0.115237	n.s.
METAP2	Q3ZC89;A0AAA9U2I8	12	0.0199785	0.876875	n.s.
GLYR1	A4FUF0	18	0.0282946	0.819943	n.s.
VIRMA	A0A3Q1MKW0	14	0.167965	0.0419693	n.s.
NCOA5	A0A3Q1M1S1	14	-0.0400739	0.635779	n.s.
PFKFB2	P26285	9	-0.213353	0.0753412	n.s.
REEP6	A0AAA9TTE3;Q32LG5	3	0.27228	0.307418	n.s.
FSD1L	A0A3Q1LQM2	7	-0.194388	0.498769	n.s.
[truncated: 4,560 more rows]
