# Supplementary material for: Pregnancy establishment in cattle without embryonic interferon tau
Source: Research Square preprint supplement (doi:10.21203/rs.3.rs-8509201/v1), 2026-01-16
Supplement: Supplementary file 2 [file 3a4dca2bad3ba7829cf0dcd9.xlsx]

## Sheet: All Trophectoderm prots (LFQ)
Genes	Protein.Ids	n_peptides	LFQ.F1_KO	LFQ.F2_KO	LFQ.F3_KO	LFQ.F4_KO	LFQ.F5_1_WT	LFQ.F5_2_WT	LFQ.F6_WT
TCF20	A0AAA9TL18	6	14.5938	14.5535	14.9317	14.1052	14.7597	14.8533	14.7204
C7H19orf67	A0A3Q1N125	2	15.7039	15.9084	15.6911	15.1269	15.5887	15.6619	15.5327
TCOF1	E1BHU1	24	17.5656	17.5302	17.8287	18.035	18.0739	17.8592	17.9288
DDRGK1	Q1LZB0;A0AAA9SK08	6	16.374	16.7566	16.5967	16.408	16.4214	16.568	16.5609
RBM42	A0A3Q1M222;A0AAA9SKY8;Q0P5L0	5	16.6913	16.5801	16.9201	16.5901	16.2689	16.6814	16.5524
RREB1	E1BN44	16	15.5065	15.4616	15.5769	15.3852	15.3554	15.4598	15.1583
AP5B1	G3MZC5	12	14.5099	14.9584	14.9766	14.5657	14.5986	14.5491	14.6065
NCOA2	E1BPY4	12	17.6405	17.5581	17.9252	17.7194	17.7328	17.6279	17.3026
MYL3	P85100	8	17.2277	17.5411	17.039	16.5452	17.1606	17.2005	18.4519
MTHFD1	A4FUD0	38	19.7809	19.5884	19.553	19.9832	19.8351	19.7377	19.9494
PSMD4	Q58DA0;A0AAA9S3W4	12	18.619	18.3583	18.6217	18.9705	18.785	18.5386	18.5917
SLC7A5	Q9TU26	5	15.0417	14.8589	14.028	15.3513	15.1088	14.8735	16.5295
MFSD10	Q0P5M9;A0AAA9SER4	5	17.5214	18.0281	17.6235	16.8651	16.9686	17.5467	17.8486
GNG2	P63212	3	16.2066	16.3413	16.1245	15.2838	15.9167	16.5428	18.4342
ZFPL1	Q2YDD3	5	16.6965	16.7951	16.8967	16.5259	16.5142	16.6864	16.6155
EDC4	E1BJH1	37	19.9824	19.8927	20.0456	20.1357	20.1533	20.1027	20.0315
GOLGB1	A0AAA9SMB5	113	20.3246	20.4037	20.7048	20.3136	20.3763	20.6103	20.5754
TPRN	G3MWU7	4	14.8853	14.7967	15.1121	14.9024	14.6426	14.9064	15.5464
PFDN4	Q2TBR6	2	15.4157	15.3125	15.1129	15.6051	15.0913	15.1956	15.3448
APLP2	F1N226	15	19.5084	19.9153	19.8751	19.2618	18.9595	19.0073	21.4194
TDP2	A7YWI9	4	14.6952	14.4466	14.231	15.4468	15.0159	14.7155	14.5619
CDC27	A0A3Q1MS93;A7Z061	13	15.8401	15.5983	15.9439	16.1507	16.0288	15.964	15.9542
U2SURP	A0AAA9SW45	24	17.4814	17.5845	17.7737	17.4366	17.5067	17.6837	17.6985
ZSWIM8	A7E305;E1BCX3	18	14.8994	15.1481	15.269	14.8225	14.9225	14.9485	14.921
EXOSC10	E1BMZ5	29	16.1223	15.9661	16.2251	16.1864	16.169	16.1486	16.0996
FH	Q148D3	16	19.5543	19.5751	19.6798	19.2004	19.3209	19.5585	19.4196
TLN1	A0AAA9RW41	99	19.8625	19.7544	19.7206	19.5056	19.6586	19.5433	19.5021
CBR4	A4IFA7	8	19.155	19.2427	19.4476	18.3854	19.007	19.3118	18.9977
EFHD2	A5D7A0	14	20.085	20.0044	20.1643	19.6878	20.1843	19.8019	18.6234
UNC45A	A0AAA9T3T4	33	17.7955	17.6549	17.678	17.9291	17.9336	17.5642	17.7386
CANT1	A0AAA9S9V5	12	16.4961	16.6432	16.5517	16.0366	16.1459	16.4032	16.1476
ARID1A	A0A3Q1M2B9	30	16.9261	16.8992	17.1138	16.9876	16.9629	17.0642	17.3665
GYS1	A0AAA9RZE5;A7MB78	6	15.9308	16.0592	16.3582	15.1456	15.3304	15.7035	16.2562
SEMA7A	A0AAA9SEK8	8	15.9978	15.4887	15.0323	15.9164	15.3953	14.9621	15.5138
TRAPPC11	A6QLC7;A0AAA9RYM0	19	17.0642	17.0529	17.1538	16.8721	16.917	17.0062	17.0412
TTC5	F6QA20;Q0P5H9	15	15.3758	15.1626	15.3877	15.2633	15.3409	15.3295	15.5201
STIP1	A0A3Q1MJH4;A0A3Q1LW78;Q3ZBZ8	31	21.2228	21.0207	21.1579	21.5871	21.383	21.1873	21.0638
TRABD	Q58DF3;A0A3Q1LNP3	9	15.2859	15.5709	15.3177	15.4995	15.3378	15.4973	15.228
UNC119B	E1BIZ3	6	16.0051	16.237	15.876	16.02	16.0493	16.3731	17.1512
RFC1	A0A3Q1N5S1	14	15.057	14.9947	14.9837	15.3141	15.2513	15.1691	15.8079
ANK3	A0AAA9RXF1	26	15.4916	15.6331	15.8527	15.1511	15.2097	15.6532	17.2799
NUMA1	F1N7I5	86	17.9987	18.159	18.3066	17.5617	17.8029	17.9414	18.0629
BCAR1	A0A3Q1M7M1	3	14.3682	14.2346	14.4152	14.6949	14.7389	14.3875	15.4284
KIFC1	A0AAA9SUF6	12	15.8866	15.6078	15.8674	15.9766	15.865	16.0064	16.1588
CTNND1	A0A3Q1M1Q5	38	19.4055	19.7652	19.7277	18.943	19.2952	19.5257	19.4466
GADD45GIP1	A1A4P4;A0A452DIN1	10	16.0731	16.1749	16.1687	16.1259	16.228	16.4254	15.9408
RBM39	A0A3Q1LWZ4	15	18.5064	18.9537	18.8845	18.4264	18.4432	18.5861	18.7455
SEC16A	F1N6K7	33	16.9508	16.8923	17.1208	16.8911	17.0225	17.0018	17.1348
LAP3	P00727	28	19.2844	19.1122	19.0724	18.5991	18.8263	18.8196	18.9803
PEX6	E1B8F6	14	15.4249	15.4732	15.8417	15.2076	15.2664	15.3282	15.053
MTMR14	A0AAA9T6E4	4	14.2431	14.9186	14.8387	14.5625	14.4434	14.3272	14.9087
SPEN	F1MRK2	19	15.7435	15.926	16.1663	15.9428	15.8865	16.0931	16.1109
COPB1	A0JN39	44	19.7781	19.6202	19.7678	19.8265	19.8401	19.6748	19.8017
NOL7	Q3SZ46	7	15.9643	16.1731	16.2855	16.5606	16.3019	16.4668	16.4822
SEPTIN11	A2VE99;A0A3Q1MUN6	10	18.4817	18.3606	18.4681	18.5277	18.5842	18.4806	19.3724
BTAF1	A0AAA9SDW9	32	16.5764	16.7746	16.7243	16.6856	16.5976	16.5669	16.6882
PKP4	A0AAA9SJ44	26	16.3236	16.346	16.5875	16.2583	16.1988	16.6481	16.1146
TTC4	A0A3Q1MJG1;Q5EA11	11	15.5396	15.5553	15.4978	15.911	15.681	15.5621	15.9409
TRIM71	A0A452DJ29;E1BJS7	22	17.3199	17.3272	17.5184	17.2282	17.3673	17.5824	17.4679
NSUN5	A6QQR1	5	14.9138	15.5735	15.0758	15.2746	15.1968	14.9386	15.0523
RAB3GAP2	A0AAA9T768	20	18.7371	19.0229	18.9361	18.9776	18.9347	18.724	18.7336
IRF2BP2	G3MXD0	6	14.5484	14.3522	14.4187	14.5621	14.7232	14.1299	14.1609
CAMSAP3	A0A3Q1LZB9	26	16.7809	16.6687	16.7384	16.5187	16.7308	16.6584	16.5086
TEX30	Q3ZC52	3	14.612	14.8643	14.5553	15.1799	15.0144	15.0421	15.1972
PTPRK	A0AAA9THG9	22	17.5446	18.0504	18.1003	17.0913	17.2146	17.655	17.5579
SYNE2	F1MF78	69	17.6795	17.7175	17.9712	16.7568	17.1841	17.2721	16.9774
MARCKSL1	Q0VBZ9;A0AAF6ZP66	2	18.7895	18.916	18.6453	18.2112	18.2159	17.8803	18.6229
BAG3	F1MIU2	19	15.957	16.007	15.8614	16.9614	16.6587	16.591	17.5803
PPOX	P56602	11	15.716	15.7361	15.7519	15.7714	15.8657	16.0384	15.5666
VIL1	Q3SZP7;Q5E9Z3	22	13.9371	14.4338	13.9799	13.9891	14.6272	13.8741	17.4123
DHRS11	Q3ZBV9;A0A452DID6	11	18.2192	18.0113	18.162	18.4635	17.9801	17.9829	18.348
TTI2	F6RG44	4	13.4495	13.2444	13.4049	13.766	13.3025	13.3457	13.2804
NDUFV2	P04394;A0AAA9SEY3;A0AAA9TZL3	10	20.223	20.5107	20.3131	19.9982	20.2258	20.3015	20.2535
INTS1	A0AAA9TV32	40	17.309	17.4891	17.6295	17.2955	17.3836	17.3392	17.5188
USP34	G3MYZ7	26	14.7661	14.7401	14.6928	14.6647	14.7248	14.6528	14.5001
PFKL	A1A4J1	26	19.8397	19.6575	19.6321	19.4708	19.5573	19.3629	19.503
SLC15A4	A6QQL0	10	17.1982	17.1121	17.0473	17.3605	16.9956	17.1131	16.7917
FBLIM1	A0AAF6Z5Y5;Q1JQB5	14	16.9464	16.6198	16.7976	16.9289	17.0935	16.973	16.9836
KIF20A	Q29RT6;A0AAA9RY60	21	15.7527	15.799	15.7561	16.0087	15.7466	15.9651	16.3393
DIP2B	F1MLE1	27	16.1869	16.3063	16.1385	16.3467	16.2548	16.2529	16.4053
MTHFD1L	A0AAF6ZL73;Q0VCR7	15	15.2551	15.2142	14.8455	15.4356	15.025	15.4187	16.816
HDLBP	A0A3Q1NND0	57	19.2292	19.1954	19.3206	19.5026	19.3868	19.4329	19.4018
NEK7	A0AAA9SNU1	13	16.6543	16.7828	16.7301	15.9496	16.4118	16.4021	16.7202
GLOD4	A0AAF6DM94	15	19.2449	19.2152	19.2875	19.2421	19.2888	19.1688	19.611
GYG2	A0AAA9T701	5	14.7859	14.7191	14.4152	14.4944	14.3498	14.1613	15.7544
UBE3A	A4IFN7	24	17.6101	17.5241	17.7296	17.725	17.7264	17.6292	17.7648
TPM3	Q5KR47	8	22.29	22.4428	22.2984	21.9738	22.1187	22.1036	22.7945
PACSIN2	Q1RMR9	16	19.1797	18.9643	19.0088	18.8349	18.9486	19.0113	19.3085
SLC7A6OS	Q1JQE2	6	15.077	14.8946	15.0444	15.6187	15.4199	15.1273	14.9629
DNMT3A	A0A3Q1LZH7	11	15.8569	15.8669	16.121	15.8285	15.6416	15.8012	16.3935
VPS52	E1BDC9	12	16.4196	16.2779	16.2387	16.2853	16.2117	16.1791	16.2386
PRKCD	F1MZX0	22	18.2294	17.8722	18.078	18.2832	18.1476	18.0986	17.9719
HDHD2	Q3ZCH9	9	16.6565	15.6393	16.0905	16.7289	16.5487	16.1947	16.2649
CSE1L	F1MWN1;A5D785	43	19.556	19.5233	19.4843	19.7106	19.5959	19.4465	19.5267
OTULIN	F6Q7W7	8	15.8325	15.7195	15.4753	15.3956	15.4205	15.5266	15.4214
MAGI3	E1BM96	8	14.5929	14.6182	14.6696	14.5483	14.4412	14.6625	14.3592
FASTKD2	F1N1T6	11	17.1747	17.3311	17.036	17.4312	17.3388	17.2158	17.1916
TTR	O46375	2	14.646	13.7523	12.8093	14.4907	14.7681	14.2446	12.8296
CDC73	E1BPQ8	22	17.4173	17.477	17.6107	17.6409	17.6089	17.593	17.766
DUSP3	A7YY43	2	14.125	14.3383	14.3953	14.2605	14.3921	14.3652	14.3154
VDAC3	A0A452DIJ5;Q9MZ13;A0A3Q1M5Z1;A0A3Q1M0L2	12	20.7243	20.6118	20.5595	21.2376	20.589	20.8161	20.5883
EIF2B5	E1BPB3	14	17.5816	17.2424	17.4193	17.7039	17.6403	17.3969	17.4674
PRPF3	F2Z4C4;Q2KIA6	22	16.8264	16.775	17.0958	17.0732	16.9658	17.0408	17.028
MIA3	Q0VC16;A0A3Q1M2R2	52	17.84	17.9068	18.0029	17.7279	17.7821	18.131	17.7968
CAND1	A7MBJ5	37	19.0624	18.979	19.0215	19.0839	18.9628	18.856	19.0753
F5	F1N0I3;Q28107	25	15.6036	15.8931	15.4302	15.0235	14.8062	15.5705	15.9682
ATP2C1	P57709	13	15.3892	15.7006	15.7945	14.8586	15.0368	15.374	15.5011
TP53BP1	E1BDS6	24	15.9271	15.9751	16.0537	16.0341	16.1049	15.9224	16.4041
S100A16	Q0VCM0	5	19.5715	19.1539	18.8898	19.594	19.7491	19.7471	20.5005
RCN1	G3N2L2	16	17.5136	17.7368	17.5769	16.5869	16.7934	17.5306	19.1599
SRPK2	A0A3Q1NBC4	8	15.7595	15.8141	15.9462	15.3772	15.2006	15.331	15.4576
AP2A1	A0A3Q1LVF9	32	19.2386	19.0574	19.0971	19.3188	19.27	19.1238	19.152
KTI12	Q148I5	8	15.9585	15.6855	15.637	16.2125	16.058	15.8307	16.012
PPP1R12C	A0A3Q1LWP2	4	14.9336	15.1004	15.3123	14.7741	14.6942	14.7618	14.9247
YBX1	A0AAF6Z3R0;P67808	7	21.4951	21.3513	21.3528	21.5313	21.5642	21.5392	21.501
BOD1L1	A0AAA9T5M5;F1N2T2	22	14.6649	14.6305	14.8325	14.8544	14.9154	14.8101	14.8617
TOE1	Q17QN2	14	18.07	17.9214	18.035	18.0925	18.0482	17.8837	18.0029
ADIPOR1	Q3T0U4	3	18.6589	18.2142	18.5161	17.9958	18.5728	17.9615	18.5014
AP3M1	F2Z4I2;Q24K11	11	18.611	18.2623	18.5186	18.3923	18.2806	18.3063	18.1886
TMEM102	Q1LZD1	7	14.7445	15.1703	15.2668	14.6859	14.567	14.4881	14.107
KIAA1671	E1BC55	18	15.543	15.828	15.7769	15.7887	15.9031	16.1281	17.5045
PRKRA	Q2HJ92	5	14.6347	14.6258	15.0949	14.023	14.3081	14.814	15.3218
NF2	A0AAA9SWX2	17	15.7327	15.767	15.7141	15.791	15.795	15.604	15.4792
ADK	A0AAA9TAD8	14	18.9945	18.5686	18.857	18.4786	18.5937	18.6863	18.8795
FBXO28	Q2NL16	4	14.4642	14.2784	14.6444	14.5079	14.6168	14.4864	14.3648
DHX9	Q28141;A0AAF6Z733	51	19.5815	19.8503	19.981	19.4971	19.4989	19.7453	19.8864
EVPL	E1B9N6	27	15.0623	15.2198	15.3094	14.9996	15.5253	15.1902	15.2529
PTMA	A0AAF6YK23;P01252	4	19.198	19.4653	19.2639	19.6105	19.0786	18.9042	19.0787
NCKAP1	F1MPZ9	37	17.2366	17.0795	17.1088	16.9746	17.0663	16.8486	17.3033
LAMA1	F1MEG3	79	17.9792	18.1921	17.7812	17.9474	17.7856	18.3336	19.8687
WDR70	A0A3Q1LXS9;Q32LB0	19	15.483	15.3387	15.362	15.5463	15.3998	15.4731	15.5178
IDUA	E1BDR2	11	16.9838	16.4286	17.0381	16.5359	16.1052	16.6566	15.959
PCCA	A0A3Q1LYL5	28	16.4231	16.6375	16.7325	15.9503	16.4567	16.656	16.74
CLASP1	E1BGU2	32	16.937	16.7955	16.8244	16.8048	16.7829	16.7256	16.9746
PTMS	A0A3Q1MEU1;P08814	3	16.4677	16.4601	16.7327	17.264	17.2048	16.2888	16.953
NXT2	A6QNX3	2	16.3191	16.3375	16.4348	15.9894	16.2529	16.2193	16.4954
NXT1	Q2KIW0;F1MNL5	2	12.0595	NA	13.179	12.1311	NA	NA	13.0766
ZWILCH	A6QM04;A0AAF6YNA5;A0A3Q1LMY8	17	15.6347	15.5833	15.4059	15.7762	15.5998	15.6632	15.5923
LIN28A	E1BHM3;A0A3Q1N5H9	7	18.1133	18.055	17.9407	18.7518	18.4361	18.4564	19.972
HNRNPUL2	E1BNQ9	28	18.9174	19.243	19.3975	18.5316	18.6774	18.8687	19.2271
ACACA	A0A3Q1N1M4;Q9TTS3;A0A3Q1NJE5	78	17.7455	17.5874	17.5045	17.48	17.5204	17.6375	17.4665
ZNF131	A0A3Q1LUV9	2	13.8441	13.9665	14.1892	13.8931	13.7164	13.6591	13.8745
TNS3	A0A3Q1NEL1	11	15.1234	15.0855	15.0657	15.3676	15.4176	14.9956	16.0329
MICALL2	F6REL8	19	15.5754	15.2862	15.6424	15.4374	15.7014	15.4059	14.875
RBM28	E1BLD4	16	16.4034	16.1841	16.4369	16.6988	16.5656	16.7889	16.6149
RELCH	A0A3Q1M6S1	21	15.974	16.0187	15.864	15.8591	15.9158	15.7659	15.8465
PIK3CB	F1MYM3	24	16.3822	16.0659	16.1219	16.0294	16.0652	15.9771	15.7427
MAN2A1	A0AAA9SXF2	40	17.9353	18.1434	18.0382	17.1026	17.2856	17.8225	17.6051
MYO18A	A0AAA9S813	79	19.7073	19.8141	19.9455	18.9781	19.3577	19.4245	19.2858
XAB2	A0AAF6DMF4	24	16.2407	16.4456	16.3757	16.2596	16.2693	16.2999	16.3269
WDHD1	E1B7F5	22	16.8176	16.7286	16.6945	16.7592	16.7454	16.6701	16.3635
DNAJC17	Q2KI83	6	15.0116	15.0589	14.8896	15.3313	15.3889	14.929	14.7267
SKIC3	A0A3Q1M8Y4	38	18.2578	18.1635	18.2849	18.1768	18.1651	18.0014	18.2813
PRPF6	A0AAA9S435;Q2KJJ0	36	17.4983	17.7161	17.7589	17.3612	17.4311	17.497	17.7573
POLE4	A6QQ14	3	15.7576	15.5513	15.4112	15.9041	15.9015	15.3198	15.6777
LRRC1	A0A3Q1LTV0	12	15.893	15.9147	15.9894	15.8	15.6453	16.1014	16.4015
PHB1	Q3T165;A0AAA9SMG6	15	20.9515	21.1621	20.8079	21.1964	21.0579	21.0401	20.6988
PCID2	A0A3Q1MVQ2;Q2TBN6	16	17.0397	17.1294	17.0542	17.0388	17.0068	16.7609	17.1596
MSTO1	A5D9D4	10	16.3337	16.1506	16.0127	15.9912	16.1782	15.6859	16.1935
SYVN1	E1BAK9	6	16.2049	16.267	16.4879	16.3339	16.1732	15.9927	15.7892
KIF5B	F1N1G7	31	17.5506	17.4625	17.5295	17.7047	17.6318	17.4405	17.791
POLR1E	Q3SZ29	11	16.2415	16.2306	16.1916	16.4019	16.2732	16.1615	16.4371
MAN1B1	G3MXQ8;A0AAA9U0J9	17	15.8423	15.6511	15.5243	15.3934	15.5419	15.7988	15.3498
ZC3H4	A0AAA9SY77	12	15.2635	15.0264	15.3835	15.2405	15.3202	15.1774	15.4097
SUPV3L1	A0AAF6DLT1	21	19.0289	19.0425	19.0454	19.1756	19.094	19.2255	18.8196
KMT2D	A0A3Q1LM54	7	14.1878	14.796	15.1281	14.9879	15.152	15.028	14.6903
NEMF	A0A3Q1MSI2	15	15.7782	15.6085	15.7212	15.7973	15.8044	15.5858	15.7456
TYSND1	A0AAA9SAI8	9	14.2704	13.9417	14.3986	14.3009	13.8563	14.3527	13.5717
EMG1	F1N532	13	18.1125	18.1281	18.0143	18.3282	18.2087	18.2874	18.2873
HIP1	A0AAA9TRE6	22	16.4356	16.4573	16.7676	16.1618	16.5449	16.4323	16.2087
CCDC137	Q17QR4	7	17.2234	17.187	17.538	17.8439	17.5403	17.4864	17.523
FKBP4	Q9TRY0;F1MU79	32	20.747	20.5517	20.52	21.022	20.9084	20.6619	20.8789
FAM98B	A0AAA9T5P2	13	17.5586	17.4221	17.5565	17.7798	17.7726	17.5673	17.5697
SLK	A0AAA9TNL3	35	16.9401	16.7639	16.5438	17.5439	17.3912	16.9203	17.6076
RC3H1	A0A3Q1M2R1	8	14.4541	14.5389	14.5343	14.6136	14.3715	14.5473	14.255
INPP5D	A0A3Q1LJT8	12	14.785	14.4762	15.0831	14.692	14.4704	14.4007	14.5984
FGFR3	A0AAA9TAT1	2	12.9608	13.7054	13.1621	NA	12.7532	13.258	14.1052
GALNT12	A0A3Q1N2Q7	8	17.7814	18.2053	17.8267	16.8072	17.4371	17.3048	18.2868
GALNT2	A0A3Q1M986	19	17.2264	17.1968	17.1449	16.5358	16.9624	17.2416	17.4605
NECAP2	A0A452DJD5;Q5E9Q4	6	16.7091	17.0821	17.1426	17.0924	16.9289	16.7734	17.3262
SPATS2L	A0A3Q1NMR2	10	15.0106	15.3667	15.4213	15.435	15.3555	15.3361	16.847
AQR	A0A3Q1MP16	45	16.8599	16.778	16.9854	16.8399	16.9682	16.9979	16.82
YWHAE	P62261	17	22.8677	22.7357	22.7911	22.7781	22.7863	22.5986	23.0678
WDR75	F1MCR2	20	16.1469	16.316	16.2741	16.358	16.1254	16.3321	16.42
SRRM2	A0A3Q1M0D6	27	17.0412	17.2481	17.7531	17.5143	17.3331	17.5953	18.1592
SDHA	P31039;G3MY67	24	19.2442	19.3078	19.3071	19.0644	19.0531	19.3207	19.0994
NUP133	F1MM55	34	17.0012	17.072	17.2394	17.083	17.0586	17.1719	17.0536
HDHD5	F1N6K5	7	15.7938	15.8885	16.0135	15.578	15.712	15.8828	15.9425
UGGT1	A0AAA9TE87	43	18.8884	18.9799	19.0109	18.5097	18.6267	18.9592	18.9056
IGSF3	A0AAA9SW71	33	16.262	16.3214	15.9335	16.2762	16.1093	16.3936	17.6747
ALDH2	P20000	15	18.7695	19.0187	19.0346	17.9981	18.4256	18.6518	18.6375
COMMD3	F1MUK6;Q3SZ76	9	17.1123	17.1699	17.1015	17.0858	17.075	16.8984	16.9816
CHCHD4	Q2KHZ4	4	16.2167	16.2271	16.2453	16.2135	16.1811	15.9306	15.7429
CEMIP2	F1MNY2	13	15.8656	15.972	15.9413	15.8473	15.6752	15.7257	16.2511
SRM	E1BM12	19	20.2521	20.079	20.0785	20.7758	20.5675	20.3367	19.9024
ITGA3	F1MMS9;A0A452DIV7	13	15.4826	16.0563	15.9146	15.0929	15.2901	15.4372	16.1251
SMARCD2	A0AAA9RZX6;E1BJD1	13	16.4502	16.3245	16.6877	16.121	16.2771	16.2857	16.1279
GGH	A7YWG4	8	17.4492	17.6845	17.4948	16.7259	16.7541	16.3496	16.5242
CNP	P06623	7	14.3998	14.3447	14.2244	13.6138	14.1948	14.1032	15.3919
NHSL3	A0A3Q1MXQ4	6	14.362	14.8678	14.629	14.0554	14.2513	14.3164	15.5155
TFIP11	F1MR60;Q29RR5	22	17.1793	17.1817	17.4122	17.2625	17.1469	17.3024	17.0435
RIDA	Q3T114	8	18.3257	18.4956	18.5607	18.4604	18.5712	18.19	18.7959
DERA	Q3T0V9	13	17.9251	18.0203	17.9921	17.9259	17.8538	17.9328	18.1188
SETD3	F6R2J7	17	18.5476	18.5059	18.6413	18.3966	18.3691	18.4336	18.4701
DNAJC2	A0AAA9S105;Q1RMH9	16	16.187	16.2088	16.2981	16.5507	16.2514	16.2706	16.3762
DHX29	E1B9N7	27	20.0823	20.135	20.3573	20.3972	20.3022	20.3917	20.2413
GART	Q59A32	36	18.9941	18.5606	18.6782	19.125	18.9826	18.816	18.6402
GOLPH3	Q1RMW9;A0AAA9S7T6	9	17.7756	17.8804	17.8989	17.7946	17.7103	17.748	18.2971
EGFR	A0A3Q1MHB0	30	16.6586	16.6752	16.6256	16.3745	16.5489	16.6619	16.5978
PHOSPHO1	E1BCN8	7	15.5858	15.6376	15.2213	15.5958	15.5219	15.6846	17.1111
INF2	A0AAA9SIE1	28	16.3934	16.5154	16.8777	15.4173	15.935	16.1668	16.2546
SF3B1	F1MX61	49	18.9592	18.925	19.1143	18.8517	18.8918	18.9656	18.8586
ALG3	F6QW25	2	16.8118	16.9925	16.7531	16.3745	16.2744	16.6451	16.6371
ERC1	A0A3Q1LTK7	29	16.8852	16.7453	16.6973	16.7766	16.5994	16.6794	17.4813
TARS2	A0AAA9S7D5	15	19.3105	19.2067	19.3036	18.8809	19.183	19.3618	18.871
MAP4	A0A3Q1M9W4;P36225	35	18.9144	18.914	19.1288	19.329	19.3513	19.2669	19.6035
MACROD1	Q2KHU5	2	15.3588	15.276	15.5277	14.4354	15.0868	15.1714	14.8082
OPA1	A0AAA9S306	38	17.3361	17.3908	17.3776	17.3141	17.2606	17.3537	16.9953
CYB5R4	Q32LH7	8	17.0561	17.1571	16.9775	17.1456	17.0703	16.8215	16.7965
FLNB	A0A3Q1MQ34	122	21.601	21.6635	21.6801	21.5184	21.688	21.5547	22.3232
CNOT3	E1BCS1	9	15.6209	15.3732	15.4822	15.8816	15.713	15.659	15.7266
CGNL1	G5E5V6	47	17.6862	17.8403	18.0431	17.1821	17.4938	17.7611	17.7587
MRPL2	Q2TA12	7	17.0068	17.1653	16.9761	17.0089	17.1925	17.3599	16.8186
JAGN1	Q2NKY9	3	17.681	17.9078	18.0257	17.3136	17.4704	17.814	17.6125
UBXN6	Q2KIJ6;F1MES6	11	15.337	15.8271	15.8248	15.6478	15.5205	15.6403	15.9368
MICU1	Q0IIL1	11	14.643	14.9203	14.9428	14.7606	14.88	14.8785	14.7407
KPNB1	E1BFV0	32	20.4149	20.1977	20.2756	20.628	20.4286	20.3114	20.5787
HSPG2	A0AAA9TDR0	134	19.4709	19.927	19.4995	18.3462	18.9505	19.5152	21.6825
RUVBL2	F1MSD2;Q2TBU9	26	18.5463	18.6429	18.726	18.6787	18.6051	18.6123	18.9032
TXNDC15	A0AAA9TYR8	6	15.9372	16.2975	16.2055	15.8815	15.8401	16.2396	16.2464
POLR1B	A0AAF6DM82	30	16.5281	16.5569	16.6526	16.8143	16.6572	16.6917	16.6955
PRRC2B	A0A3Q1LY98	7	14.3584	14.0461	14.5543	14.9052	14.6567	14.8865	15.3121
IPO4	A0A3Q1N3C7	32	18.2903	18.025	17.8886	18.8176	18.5223	18.1363	18.4051
DIS3L	A0JN80;F1MEA6	3	14.3588	NA	14.1978	14.0974	13.7603	13.8046	13.9909
RARS1	A7YW98	39	19.5776	19.5246	19.5231	19.8381	19.6915	19.4153	19.8046
CDC23	A1A4R8;A0AAF6YT67	15	15.622	15.3216	15.5379	15.7576	15.5206	15.4674	15.3872
MYO1B	A0A3Q1MR81	36	18.0915	17.8231	17.6631	19.12	18.9293	18.3661	18.1588
PA2G4	Q3ZBH5	23	19.8754	19.7601	19.8809	20.0813	19.8773	19.7835	19.6861
EDRF1	A0AAA9TFU8	15	15.1512	15.163	15.1981	15.6043	15.5714	15.2145	15.1472
KLHDC2	Q5E9A7	6	14.6364	14.9928	14.7706	14.7201	14.8834	14.7774	14.7238
RAF1	A7E3S4	7	16.2029	16.2169	16.1264	16.1475	16.145	16.0761	16.3558
STXBP1	P61763;A0AAA9TPJ7	16	15.5251	15.5651	15.2471	15.889	15.7107	15.573	16.8454
STXBP2	F1MHC2	24	18.8605	18.6232	18.7747	18.6678	18.6521	18.5339	19.0203
NT5C2	O46411;A0AAF7AMR3	18	17.668	17.6842	17.4803	17.5417	17.5429	17.6421	18.7224
TFAP2C	Q0VC14	10	18.3996	18.3198	18.5498	18.2047	18.3475	18.4882	17.7803
NUP188	A0AAA9RVU1	38	16.892	17.1223	17.0796	16.9737	17.0344	17.0646	17.0334
SMU1	A0AAF6Z1S7;Q2TBS9	16	18.2605	18.3001	18.4376	18.4078	18.5552	18.4305	18.422
MRPL40	A0AAA9SEM5	6	17.578	17.7434	17.685	17.4946	17.5063	17.7257	17.6767
TAF15	A0AAA9SH86	2	19.898	19.5766	20.0588	19.8132	18.6875	19.027	19.5583
FUS	A0A140T861;Q28009	8	19.2776	19.4035	19.5376	19.1071	18.9494	18.9729	19.2047
ATP11C	A0A3Q1LWW8;A0AAA9RSX8	19	17.1118	17.0245	17.0231	17.3169	17.4053	17.4589	16.989
ZNF532	A0A3Q1LTH4	4	13.5688	12.7503	13.2095	13.3244	13.4285	13.0944	13.3474
SLC12A6	A0A3Q1M2S7	11	17.7266	17.5394	17.5314	17.3157	17.8421	18.0288	17.1905
FOCAD	A0AAA9TVP1	25	16.8687	16.4927	16.6904	16.7383	16.889	16.6892	16.926
PIGG	A0AAF6DLK5	11	14.6311	14.9302	14.9601	14.5435	14.553	15.0058	14.6616
HEATR1	F1MDU9	62	16.7184	16.6835	16.7727	16.9289	16.8381	16.9183	16.8285
NPEPL1	A0AAF6DME4	7	14.4816	14.6889	14.6269	13.603	13.869	13.8216	15.394
EIF4G3	A0A3Q1M1I5	20	16.2112	16.2825	16.2719	15.4872	15.633	15.7838	16.919
CCDC91	A0A3Q1LKF0	4	14.8975	14.923	15.0343	14.8863	14.9579	14.3519	14.4024
PRMT5	A0AAA9TZG3;A7YW45	16	18.5134	18.6588	18.3908	18.9182	18.5955	18.3114	18.9087
EXOC3	Q0V8C2	12	15.8037	15.8386	15.8833	15.8603	15.7471	15.637	16.2176
FYCO1	A0A3Q1M133	18	15.3445	15.3185	15.3564	15.4605	15.3793	15.328	15.3838
VPS35L	A0AAA9TRE2	28	18.174	18.0982	18.1159	18.22	18.2465	17.9286	18.0496
RAB24	F6Q1G9	6	16.3013	16.4181	15.8438	15.8227	15.967	16.0813	16.8562
ARL6IP4	A0AAA9TN08	2	13.8553	13.5816	14.0909	13.9553	14.0313	13.8621	14.3205
SPECC1L	E1BJ04	14	15.9491	15.8931	16.1581	16.0435	16.0863	15.9894	16.0349
TTLL12	Q08E58	26	19.185	19.1138	19.3398	19.017	19.3322	19.2036	18.73
FARP1	F1MFC6	19	15.9464	15.6654	15.7747	15.661	15.8508	15.8968	16.7418
CDK2	Q5E9Y0	10	16.5507	16.5447	16.6629	16.6533	16.6927	16.6054	16.6128
PLEC	E1BF59	209	18.719	18.9755	19.1036	18.5184	18.9682	18.8989	19.884
POLG	E1BDI3	8	15.5328	15.4565	15.4748	15.2753	15.2771	15.2045	15.0962
BAZ2A	A0AAA9SS13	18	16.0592	16.1171	16.1297	16.0398	16.0273	16.0477	15.8547
NAPA	P81125;F6Q334	19	18.5136	18.6623	18.8408	18.2772	18.3548	18.4334	18.4567
ARHGAP17	F1N458	13	18.5998	18.8001	18.6329	18.3376	18.2941	18.4942	19.084
H6PD	A0A3Q1LRN7	24	17.8539	17.8482	17.9611	17.7072	17.885	17.9543	17.246
QDPR	A0AAF6ZJM9;Q3T0Z7	10	18.4494	18.0856	18.3606	18.3606	18.4374	18.2945	18.4063
CROCC	E1BBS9	7	15.9432	15.9157	16.2962	15.2714	15.894	16.1514	15.7655
PHKA1	A0AAA9SIN1	3	14.9573	14.9595	14.8127	14.5428	14.5599	14.3066	14.4612
SHMT2	Q3SZ20;A0AAA9TQ60	24	18.6556	18.9168	18.9189	18.3637	18.2275	18.1518	18.9401
FAM83F	E1BM16	7	15.3035	15.2741	15.6652	14.6622	14.4595	15.4639	15.8081
MRPL12	Q7YR75	7	19.0412	18.9718	18.8447	19.1947	18.9381	19.0562	18.6382
EPS8	A0A3Q1M2P8	9	16.6825	16.2096	16.0973	15.979	15.5843	15.8851	15.704
XRN2	F1MKX7	23	18.0143	17.9312	18.0133	18.0352	17.9373	18.017	18.095
KRT19	A0AAF6YMV1;P08728;A0A3Q1LJB2	19	24.5411	24.8748	24.6805	23.9895	24.2515	24.36	25.1841
SNRNP200	E1BH78	97	18.9419	18.9981	19.1115	18.8838	18.8727	18.9224	19.023
PRXL2A	Q3ZBK2	14	21.8349	21.4224	21.6565	22.8658	22.3834	22.3122	20.9964
EPPK1	A0A3Q1LMV9	98	19.5374	19.5867	19.8458	20.5362	21.1297	20.0602	20.1904
NAA10	Q2KI14;A0AAF6ZQB2	9	17.3398	17.3005	17.2342	17.5025	17.413	17.3417	17.4418
ZNF706	A0A3Q1MFB7	2	16.8072	16.9784	16.8966	17.2375	17.0244	16.8531	16.8301
FKBP8	F1N2P6	10	17.4173	17.5803	17.604	17.2794	17.5269	17.7283	17.7868
ELAC2	E1BDK7	22	16.2858	16.473	16.2012	16.779	16.5906	16.3757	16.1679
UAP1L1	A0AAA9SCV4	18	18.9471	19.0051	19.0347	18.7935	18.6542	18.5023	18.4378
RBM33	E1BNF0	6	14.7565	14.8715	15.1924	14.5821	14.7259	14.8654	14.6939
SPTAN1	A0AAA9TJI4	142	18.819	18.8416	18.8322	18.2472	18.4852	18.7002	19.3781
MACF1	A0AAA9T0L5	178	19.2218	19.1986	19.245	19.0944	19.0436	19.0368	18.8465
NOL11	Q3MHH2;A0AAF6Z211	16	16.4592	16.5645	16.3126	16.5304	16.4457	16.5575	16.5075
FHOD1	G3MYQ1	13	15.681	15.5452	15.495	15.6013	15.7813	15.6803	15.2607
EPRS1	A0AAA9TMZ2	73	18.9552	18.6655	18.7472	19.1999	19.0708	18.9117	19.0404
WWC1	F1N3I6	7	16.8564	17.0326	16.9495	16.9761	16.9082	16.9569	17.1927
CDK13	E1BB52	9	14.8196	14.8186	15.2946	14.8993	14.8138	15.0832	14.7076
ALDH16A1	A0AAA9TSB3;A6QR56	14	17.149	17.1893	17.1578	17.0638	17.0032	16.918	17.3932
ATR	F1MLY7	17	16.0583	15.8401	15.7134	16.368	16.1726	16.0794	15.8293
HNRNPLL	F1N7G0	21	17.0372	17.1684	17.2848	16.7909	16.9858	17.1459	17.0079
POLR1A	E1BIX2	44	17.363	17.2881	17.4541	17.7221	17.4812	17.615	17.3891
RHPN2	A4FUC9	28	16.4297	16.7088	16.6304	16.0133	16.1334	16.6613	18.0382
ZNFX1	E1BN24	6	15.0399	14.8911	15.0591	15.3038	15.3087	15.0213	15.2049
HUWE1	E1BNY9	92	17.1677	17.2558	17.3898	17.3113	17.3676	17.3396	17.77
HTT	E1B8E7	31	16.6839	16.4723	16.4121	16.4765	16.4864	16.1906	16.5901
PTPN23	E1BIU7	29	16.2702	16.3644	16.3792	16.1668	16.2371	16.2357	16.3043
KIF2A	Q2NL05;G3N277	17	16.3478	16.5108	16.4923	15.9774	16.0088	16.238	16.5812
NUDT2	Q29RJ1;A0AAF6ZFU3	4	16.7119	16.0238	16.603	16.8214	16.7047	16.5	16.7409
RPS25	A0A3Q1MTI8;A0AAF6ZQK7;A0A0A0MPA4;Q56JX5;A0A3Q1MT40	4	22.2156	22.5018	22.242	22.3126	22.241	22.0696	22.2482
PAK4	A0AAF6DLY7	9	15.9526	15.8999	15.9929	15.8738	15.9926	16.0275	16.3089
NCAPH	A0AAA9SGA9	21	17.0936	16.8175	16.9485	17.3366	17.2582	17.2154	17.1621
TRMT5	Q3MHN8	15	16.8376	16.6752	16.6051	17.0938	16.89	16.5809	16.6507
ASPSCR1	F1MTZ8	14	15.847	15.5117	15.7349	16.0508	15.8994	15.8344	15.8366
PPP5C	F1N719	15	17.3711	16.9041	17.1132	17.5748	17.5321	17.0556	16.8109
DIMT1	Q2KHT8;A0AAA9SKX4	13	15.9758	15.7283	15.834	16.599	16.2783	16.129	15.954
GATA2	E1BAM5	5	18.158	18.0764	18.2796	17.7961	18.0264	18.6234	17.7373
EIF4G1	F1MX04	43	19.7257	19.4721	19.6039	19.8628	19.7624	19.6979	19.5363
PPP2R5C	A4FV55	6	16.6004	16.8168	16.796	17.0525	16.7733	16.5101	17.0587
LRP1	E1BGJ0	53	18.1541	18.2534	18.0164	17.0829	17.9305	17.9712	19.7932
XPO7	G3N1J2	33	17.3167	17.404	17.4776	17.1002	17.0927	17.0474	17.2212
GIGYF2	A0AAA9SKH3	20	16.0535	15.9788	16.2812	16.68	16.6544	16.5119	16.2824
UBE2O	F1N3I3	26	17.7714	17.5969	17.6242	18.2587	18.0004	17.5853	18.2813
ISCA1	Q3SZG8	4	15.9414	15.575	15.5191	16.0334	16.0544	15.7639	16.1028
ME1	A0A3Q1MWC7	15	15.7552	15.3814	15.3625	16.2181	16.3503	15.8553	16.653
TUBB6	Q2HJ81;A0AAF6ZEV9	6	22.8465	22.6968	22.7555	22.9054	22.8343	22.7527	22.8609
CCDC85C	F1MZJ7	11	15.1751	15.5448	15.5019	14.857	14.8189	15.2136	15.0732
OAS1Y	F1MV66	5	NA	NA	NA	NA	14.4568	14.7681	14.2664
ANXA1	F1N650;P46193;A0AAA9SIE7	20	21.0729	21.6632	20.9841	20.2459	21.6983	20.9088	22.1826
IMMT	A0A3Q1MFE4	34	19.719	19.6661	19.6378	19.7004	19.7994	19.9256	19.3552
AMT	A0AAA9TRT8;P25285	12	15.7425	15.5868	15.9391	15.4318	15.619	15.8033	15.3942
MYO5B	A0AAA9SMD5	34	16.7416	16.7897	17.0315	16.7123	16.8285	16.663	16.5057
FADD	Q645M6	9	18.0846	17.7636	17.8972	18.1486	17.9718	17.8028	18.3542
ELP1	A0A3Q1M6R3	33	16.2646	16.2747	16.2004	16.8179	16.4513	16.2617	16.5922
MGC134282	Q2TBU1;A0A3Q1MMH2	3	15.9779	15.8866	16.1593	16.5365	15.8166	15.9588	15.8999
CTNNB1	Q0VCX4;A0AAF6Z2K7	26	19.4611	19.8102	19.8896	18.9253	19.1153	19.337	19.1498
ICMT	G3N1V4	3	16.3352	16.2435	16.5934	15.7384	15.777	16.4766	16.3259
PGM2	F6QEU6	23	18.7642	18.544	18.6387	19.0286	18.8751	18.4778	18.1586
TRMT2A	E1BMX2	24	16.8962	16.8824	16.831	17.3796	17.1887	17.1059	17.1125
SLC27A6	A6QQD5	24	16.5852	NA	15.6924	18.9341	16.356	17.1493	NA
JUP	Q8SPJ1	26	20.1413	20.3883	20.6171	20.0456	20.1885	20.4004	20.1717
ATM	E1BEI6	29	16.7512	16.8888	17.0336	17.0482	16.9189	16.8217	16.8824
RAI14	A0AAA9STV0	18	16.6905	16.4096	16.2918	16.7139	16.2309	16.6238	18.2102
DUS2	F6QF30	7	14.4259	14.6334	14.2795	14.8619	14.3892	14.4305	14.394
NIPBL	E1BKC4	33	17.5025	17.7657	17.7194	17.2766	17.4374	17.646	17.6685
ABCF1	A0A3Q1NB13	32	18.4616	18.4486	18.4072	18.6325	18.5876	18.4641	18.3917
PAG10	F6Q3A5	7	15.4	16.821	17.3812	NA	NA	12.2301	15.0342
KIF11	E1BF29	34	16.0033	15.7028	15.5774	16.4701	16.257	16.0096	16.026
VCL	A0A3Q1LIB4	50	20.312	20.4106	20.3792	20.3275	20.4129	20.2318	20.6256
PSMA2	Q3T0Y5;A0A3Q1LX83	11	18.7872	18.546	18.5269	18.7364	18.7149	18.6642	18.4091
YES1	F6S1J8	9	17.3807	17.1873	17.2033	17.4882	17.3928	17.2907	17.5432
SRC	E1BIM8	14	19.5073	19.4806	19.5847	19.0314	19.2961	19.3133	19.3011
FBXO22	A5PJX0	9	16.3382	16.3381	16.4398	16.4196	16.3758	15.948	15.9763
QRSL1	Q29RP9;A0AAA9RYD0	14	17.0223	16.746	16.8774	16.8394	16.9787	17.0906	16.9276
ATP23	F1MY08	3	13.7821	13.7513	13.7965	13.5333	13.551	13.6844	13.7348
POLE	A0AAA9SFP0	28	16.2234	16.2681	16.1836	16.3438	16.3226	16.3573	16.243
THUMPD3	Q2T9W2;F1N027	10	16.0135	15.8763	15.6938	16.2275	16.0996	15.8396	15.9801
RAB3GAP1	A0A3Q1MFP2	27	15.8627	15.6661	16.0559	15.9667	15.9639	15.9155	15.7139
FTSJ3	F1MY97	16	17.3346	17.3671	17.5648	17.7033	17.4219	17.6803	17.3924
HYOU1	A0A3Q1MBP1	43	19.6767	19.6782	19.6171	19.7186	19.7348	19.9033	19.6396
NBAS	A0A3Q1MF39	32	16.2177	16.2538	16.4007	15.9972	16.1716	16.1623	16.3858
STK24	A0AAA9TSZ5	10	17.5578	17.6522	17.7583	17.3657	17.3016	17.2899	17.7078
LYN	F1N261	8	15.4271	15.5305	15.4726	15.2334	15.2657	15.1891	15.8497
SMG8	A1A4J7;F1MZ61	12	15.5436	15.3202	15.6327	15.4991	15.6538	15.5448	15.5903
AKAP17A	A0AAA9TKW4	10	16.5294	16.5542	16.6596	16.2415	16.6264	16.6344	16.458
UTP18	A0AAA9THB3	18	16.8003	16.7568	16.7335	16.9882	16.9799	17.1011	16.8614
GAMT	Q2TBQ3	8	16.3988	15.8555	16.2224	15.7146	15.9249	16.0228	16.3624
ZNF622	F1N194	11	16.2525	16.0074	16.2202	16.6508	16.3136	16.3369	16.1802
CACUL1	F1MUK4	6	14.666	14.9592	14.6293	14.9732	15.0788	14.7537	14.7285
AFP	Q3SZ57	23	NA	14.7104	14.4937	14.5959	12.9245	13.1751	17.987
SREBF2	F1ML06	10	15.2673	15.1779	14.7752	14.7902	15.104	15.2727	15.1018
ACIN1	F6QIB4	18	16.8437	17.0394	17.2519	16.9066	16.8715	17.0308	17.1508
RUSF1	G3N1G1	6	15.0413	15.5509	15.2158	14.9318	14.6727	15.2127	15.5518
DDX27	A1A4H6;A0AAF6ZIP1	25	16.967	16.9842	17.1194	17.4749	17.1175	17.2505	17.1377
NPTN	A0A3Q1LL79	5	16.9303	17.0557	17.1034	16.5436	16.7202	17.0274	17.4987
FUNDC1	F1N5S9	2	15.5589	15.5183	15.2305	15.7017	15.6586	15.6384	14.9113
GCDH	A0AAF6ZG02;Q2KHZ9	5	16.284	16.1546	16.3821	16.6311	16.636	16.5471	16.3283
PPA1	P37980	13	17.35	17.0476	17.0502	18.0158	18.0564	17.4775	17.7316
NONO	Q2KJ42;A0A3Q1LXP0	20	19.3074	19.696	19.7791	19.149	19.1853	19.6027	19.7085
RMDN3	A0AAF6YKI7;Q1JQC5	11	17.8202	17.9369	18.1705	17.7185	17.7836	18.0056	17.9902
METTL1	A0AAF6Z3Q7;Q2YDF1	8	16.5131	16.2554	16.4262	16.9832	16.6567	16.3257	16.284
SARS1	Q9GMB8	25	20.665	20.3844	20.5607	20.5473	20.4769	20.2255	20.2929
ARFGAP3	Q17R07	22	17.9551	17.6556	18.0233	18.2874	18.254	18.0602	18.1732
MTIF3	A0A452DIY2;Q32KZ1	6	14.0005	14.0357	13.8728	14.1354	13.8264	14.2922	13.8448
PDK3	A0A3Q1MR25	8	16.017	16.0986	16.1169	15.6646	15.7186	16.0464	15.4695
TTF1	E1B9V4	7	15.1522	15.0406	15.2003	15.1689	14.9987	15.1871	15.4002
ZNF592	F1N5U2	6	14.359	14.5357	14.7283	13.9463	14.3267	14.3357	14.5176
QPCTL	A0AAF6ZAY0;Q0V8G3	6	15.0351	14.7327	15.0477	14.6422	14.8435	15.0905	14.9484
MEAF6	Q58CU0	2	15.4773	15.6644	15.6644	14.8477	14.7447	15.0142	15.4148
UTP20	E1BGE2	49	16.7034	16.8674	16.7402	16.8132	16.7897	16.9259	16.7709
NUP155	A0A3Q1M9F3	43	17.7011	17.812	17.9305	17.6703	17.763	17.9019	17.8629
CHCHD9	Q3ZCI0	4	17.6322	17.8652	17.9037	17.9872	17.9442	17.8928	17.8327
SPON1	Q9GLX9	7	14.6902	14.2618	14.4396	13.9688	13.8682	14.1905	15.5965
LPCAT1	F1MTK4	9	15.801	16.1296	16.1609	16.4144	16.0288	16.4498	16.7905
PYM1	A6QPH1;A0AAA9SNG8	9	16.3866	16.3345	16.6876	16.7393	16.6701	16.6643	16.7259
TKFC	A0JN77;Q58DK4	13	18.6839	18.6702	18.7253	17.709	17.9297	18.0569	18.2029
RAB11FIP1	A0A3Q1N1R3	19	17.3801	17.7791	17.7172	17.7282	17.3643	17.2584	17.987
SON	F1MYN8	31	16.6897	16.9293	17.0636	16.8349	16.9005	17.0401	17.0769
SMN1	A0AAA9RZF6;O18870	6	15.1357	14.885	15.441	15.4854	15.4789	15.3693	15.1406
ATG4B	A0AAA9TG97;Q6PZ03	12	16.4198	15.9698	16.3777	16.728	16.5408	16.3618	16.1943
SHPK	A0A3S5ZPP1	3	13.8465	14.2932	13.8555	14.1093	13.643	12.9345	13.3753
PHF23	A5D962	4	14.522	14.5874	15.0643	14.507	14.617	14.8979	14.8517
NUP107	E1BDU0	23	20.3838	20.4798	20.7265	20.5301	20.46	20.6228	20.5623
NUS1	A0A3Q1MAW4	5	15.4362	15.3744	15.4955	15.685	15.4504	15.6289	15.182
UROD	A0AAA9RWR1	9	16.7913	17.0118	17.1278	16.9152	16.8601	16.4532	17.0474
TRA2B	Q3ZBT6	8	19.1624	19.1676	19.2753	18.92	18.8363	19.0971	19.1787
HEATR5B	E1BB26	41	17.5738	17.4284	17.7279	17.5357	17.4202	17.5012	16.9572
LYAR	A0AAA9RX06	16	18.5462	18.6713	18.6919	18.7997	18.676	18.7106	18.8344
CBS	A0A3Q1LSY7	14	16.9891	17.0519	16.9912	17.2742	17.0497	16.8765	17.6622
GIT2	A0AAA9S5N2	6	15.4288	15.0368	15.0793	15.2768	15.2485	15.2824	15.3637
UBR4	A0AAA9TU63	117	17.9235	17.7745	17.8836	18.0376	17.933	17.7595	17.7469
FLII	F1N365	33	16.7657	17.0474	16.9698	16.8126	16.868	16.6845	17.037
ILVBL	A6QQT9;A0AAF7APW4	15	17.8109	17.9718	18.0837	17.2474	17.3633	17.7039	17.4835
NUP214	F1MH31	33	16.5448	16.419	16.562	16.8937	16.7427	16.8014	16.678
RRP12	A0A3Q1M070	39	17.3446	17.4645	17.3983	17.6784	17.5272	17.623	17.5436
NFYC	A0AAF6ZUW3;Q5E9X1	2	15.8916	15.8392	15.7521	16.021	15.9319	15.8334	16.0768
ETFDH	A0A452DIQ6;Q2KIG0	13	17.5337	17.6026	17.4444	17.3229	17.4409	17.4399	16.9096
CAT	P00432	13	20.4579	19.9639	20.0613	20.8435	20.5838	20.5765	19.443
DHTKD1	E1BFI2	11	15.0992	14.8921	15.1827	14.4985	15.0218	15.0439	15.323
DICER1	F1MCQ5;Q6TUI4	17	15.7287	15.699	15.7693	15.6173	15.7898	15.5547	16.2464
HSPBP1	Q2KJ77	15	17.3972	17.2591	17.06	17.8708	17.7417	17.3275	17.6665
ARHGEF39	A0AAA9TVJ4;Q0P5E3	5	14.7376	14.4561	14.6974	15.3302	15.1931	14.9585	14.6155
OSBPL3	F1MLJ5	24	16.4527	16.5346	16.4673	16.1949	16.481	16.4767	15.728
REPS1	F6Q4T4	20	17.2684	17.0842	17.3787	16.9391	16.9301	16.9522	16.743
DST	A0AAA9S4P4	29	14.6471	14.8885	14.8743	14.5341	14.6241	14.7401	16.3785
NCLN	A0A3Q1NCG7	17	18.734	18.484	18.5971	18.449	18.471	18.787	18.378
HKDC1	F1MIM3	38	19.7367	19.9898	20.0153	19.4743	19.6754	19.7824	19.0221
RBM14	F1MI47;Q5EA36	23	18.514	18.7739	18.9114	18.8866	19.0573	19.1742	19.4288
LAMB1	F1MNT4	48	17.9414	18.1146	17.786	17.6691	17.7914	18.1863	19.8535
SHTN1	A0A3Q1MCX8	29	18.3697	18.7472	18.7887	17.8829	18.146	17.9987	17.9354
ZNF428	E1BJ55	4	14.7634	14.2859	14.7446	14.8781	14.7804	14.965	16.071
CSNK1A1	A0A3Q1LK11;P67827;A0A3Q1MI36	11	17.2184	17.4177	17.4169	17.411	17.3985	17.1416	17.4959
THOC6	A0A3Q1MZJ3	16	17.2277	17.3702	17.4265	17.2191	17.3443	17.4826	17.4818
NOP14	F6RNL0	22	16.464	16.638	16.5283	16.8212	16.694	16.8227	16.6358
ADARB1	F1N0T4	3	13.6182	13.2662	14.3559	NA	12.1217	12.9685	12.9509
CLIP1	E3W9A2	45	16.7306	16.6769	16.7585	17.1775	17.0988	16.8311	17.0919
VPS53	A0AAA9SLW2	13	16.1831	15.9894	16.1805	16.2113	16.1757	16.0849	15.9801
SLC4A2	F1N4L1	13	15.5975	14.9658	15.5344	14.5168	14.7009	15.1418	16.1746
NDUFS8	P42028;A0A452DIK3	5	18.3391	18.7893	18.4147	18.0997	18.1496	18.337	18.0404
CCDC50	A0A3Q1MBX8	6	15.3328	15.3512	15.3821	15.6794	15.625	15.3461	15.45
MDN1	A0AAA9TK27	116	19.6639	19.6256	19.7076	19.9072	19.9134	19.898	19.6674
CST6	Q5DPW9	10	20.9588	18.5062	17.1394	20.3774	20.8248	18.3464	17.7555
RNPEP	G3X743	19	19.5662	19.4394	19.3483	19.1808	19.1991	19.1274	19.0854
CEP350	E1BC48	7	14.0114	14.3267	14.5627	13.9858	14.1874	14.0809	14.0638
BRWD1	F1MTQ0	10	14.8913	14.9759	14.9579	15.1435	15.0286	14.8264	15.4293
FUBP3	A6QP83	13	16.3131	16.2892	16.5957	16.3248	16.3387	16.5348	16.5296
PEX11B	Q148K5;A0AAF6YS65	8	16.1903	16.3088	16.3688	16.4592	15.8525	16.1737	15.8065
PALLD	A0A3Q1MYK9	23	18.8242	18.7709	18.9134	19.2913	19.273	19.0296	18.9328
TBCD	A0AAA9SWC2;Q28205	31	16.8842	16.6901	16.6989	17.0683	16.9469	16.6948	16.92
MACROH2A1	A0AAA9T2Q5	10	17.8756	17.7029	18.0172	17.0372	17.4618	17.6843	17.546
ACOT7	A0A3Q1N7U4	15	19.1876	19.1731	18.9132	19.2185	19.1411	18.9549	19.3516
NOSIP	Q3SWY5	10	15.956	16.2728	16.427	15.9392	15.7058	15.8139	15.9545
ARHGEF7	A0A3Q1M3G8	17	16.4151	16.1784	16.3378	16.132	16.2555	16.2714	15.9962
SPTBN2	A0AAA9TB55	63	16.476	16.6922	16.7245	16.1803	16.342	16.7205	15.7224
PRKAR2A	A0AAF6YZS2;P00515	14	18.436	18.5349	18.5263	17.9523	18.2178	18.1752	18.5166
RIOK3	Q1RMT7	5	16.4957	17.0347	16.8433	16.7463	16.701	16.6946	16.7428
ANXA4	A0AAF6YHR8;P13214	18	18.4322	18.9959	18.5398	17.7177	17.8081	18.006	18.5211
ACSF2	Q17QJ1	14	17.1119	17.115	17.5696	15.9073	16.7976	17.2977	16.9278
AKR7A2	F1MZC0;A0AAA9S338;A0AAA9SP77	14	19.4753	19.2609	19.4846	18.8153	19.0396	19.1044	18.6868
GEMIN5	E1BJG3	44	16.9207	16.6662	16.6146	17.1762	17.0213	16.8856	16.7209
EIF4B	F1MYS7	13	19.4594	19.7214	19.9082	20.1942	19.9172	19.6571	19.6509
ADSL	F1MHP6;A3KN12	21	18.505	18.0289	18.1013	18.8574	18.7698	18.3882	18.4534
SUPT16H	E1BNP8	38	17.8396	17.9144	17.8934	17.896	17.8492	17.8547	17.9249
GBF1	E1BMC4	40	17.2136	17.3339	17.4059	17.1853	17.2493	17.2874	17.4468
UBXN4	Q3ZBU9	10	16.0398	16.4648	16.3526	15.9244	15.8399	16.2698	16.2476
MB21D2	E1B9A3	6	14.5367	14.5399	14.8744	13.8777	13.7283	14.367	15.216
SH3BP1	E1BH11	17	17.2939	17.1214	17.3351	16.7614	16.9181	16.9317	16.6907
CCDC22	Q1RMI8	18	17.529	17.5147	17.4192	17.8471	17.7325	17.3875	17.5611
COA7	A0AAA9TD90	6	16.6834	16.5414	16.7039	16.6354	16.7222	16.5477	16.216
TOP2B	A0AAA9T1Q6	28	18.107	18.4664	18.4484	17.6965	17.7468	18.0413	18.1392
ANLN	A0AAA9S9M8	31	16.6757	16.2454	16.1698	17.8842	17.2885	16.7696	16.3332
MNAT1	Q3SX39	9	15.2453	15.4328	15.7009	15.4358	15.4099	15.2942	15.0862
GCN1	A0AAA9SA20	100	18.1665	18.019	18.019	18.2415	18.1646	17.9679	18.2868
SEL1L	F1MGJ5	18	16.495	16.4208	16.3683	16.3022	16.3146	16.5173	16.1213
MYCBP2	A0AAA9RZQ5	42	15.7291	15.6486	15.9788	15.4367	15.6494	15.7717	15.4245
ARHGAP21	A0A3Q1M9B2	15	15.7146	15.6564	15.6871	15.4223	15.4916	15.7209	16.5425
GOLGA5	F6RNZ4	22	16.6689	16.7924	17.0959	16.579	16.6811	16.8103	16.8944
WASHC2A	F1MTG3	26	16.5293	16.4837	16.6943	16.6008	16.6206	16.3012	16.6163
PKP3	A0A452DJL3;Q08DQ0	30	17.0772	17.2506	17.3911	16.9586	17.2303	17.321	17.1224
SLC35B1	Q8MII5;A0A3Q1MTA4	3	16.3873	16.445	16.1893	16.4942	16.4657	16.5302	16.0029
SPTLC1	Q3MHG1	16	18.3312	18.3787	18.4665	18.4876	18.5484	18.5983	18.6872
KDM3A	E1BFC2	10	16.6767	16.5887	16.5226	16.5697	16.6884	16.5372	16.5963
PKN2	F1MFK1	21	15.5179	15.3697	15.3963	15.766	15.6941	15.5204	15.825
PKP2	A4IF71	38	18.5094	18.4171	18.665	18.4052	18.6294	18.7361	18.5571
CEP192	A0A3Q1LJH6	12	14.9065	15.1372	15.2358	14.9283	14.8995	15.1047	15.2044
IDH3B	O77784	13	16.8016	16.7486	16.7801	17.2786	17.2854	17.1221	17.044
NIFK	Q3SZM1;A0AAF6ZAT9	15	17.6516	17.7434	17.8338	18.2247	18.0369	18.146	18.0461
LXN	A0AAA9T613	3	17.5707	17.7041	17.6994	16.5665	16.9885	16.8555	17.3315
BRD4	E1BNS3	17	18.6871	18.6623	18.8406	18.629	18.7319	18.769	18.6505
DSG2	A0A3Q1MKM2	38	19.0768	19.1896	19.3347	19.2179	19.2333	19.272	19.3597
TRIM24	A0A3Q1LM29	11	15.6055	15.7488	15.7105	15.4129	15.3983	15.6116	15.7072
STRAP	Q5E959	19	18.5239	18.2022	18.4792	18.7985	18.705	18.7366	18.6398
TRMT6	A0AAF6YIK1;Q2T9V5	17	16.4359	16.2862	16.3632	16.8515	16.6548	16.2838	16.4598
TRIM36	A0A3Q1N3G7	25	18.728	19.1363	19.0172	17.5717	18.3064	18.5485	18.41
PDIA6	A0A3Q1MRD2;F6QH94	18	21.6582	21.6525	21.5557	21.379	21.4027	21.6831	21.5935
GCH1	A0AAA9SF01	7	15.9921	15.8395	15.5438	16.5653	16.0079	16.1288	15.9522
TMF1	F1MUW6	26	16.7273	16.6626	16.8649	16.7591	16.7662	16.7014	16.6655
GPAM	F1MDT6;Q5GJ77	15	16.0153	15.9456	16.2769	16.3788	16.1931	16.3709	15.8737
PIGS	Q3SZL5;A0AAA9RZX1	10	16.434	16.2044	16.5382	15.9866	16.164	16.4556	16.1856
MLLT10	F1MLK4	5	13.4911	13.5606	13.6841	13.404	12.9396	13.5157	13.2593
MICAL1	F1MH07;A0AAF6YSC4	16	18.1532	18.3396	18.6462	17.3687	17.3076	17.4972	17.6273
MCCC2	E1BPP6	18	19.8783	20.2006	19.9973	19.6919	19.6176	19.9256	19.7173
COL18A1	F1N6W9	23	20.1778	20.2208	19.965	19.3938	19.5053	20.1398	22.2842
SYPL1	A0A3S5ZPC1	3	18.4178	18.5227	18.4706	18.3469	18.2367	18.4965	18.4551
EPB41L5	Q58CU2;A0A3Q1LUC0	18	17.0057	16.7758	16.7067	17.1909	17.1325	17.2743	18.0787
GLE1	Q3ZBK7;A0AAF6Z191	13	17.4781	17.2384	17.4737	17.4602	17.5295	17.4476	17.5105
SMC1A	O97593	44	19.0323	19.1168	19.1122	18.8947	18.9257	19.035	19.1706
GOLGA3	A0AAA9SFD3	40	16.0671	16.115	16.1982	16.1543	16.0997	16.1354	16.4588
RPAP1	A0JN53;A0AAF7AML4	24	15.4387	15.6541	15.5111	15.9187	15.6439	15.3997	15.737
APOE	Q03247;A0A3Q1LPF0	13	16.8989	17.4012	16.8431	17.2004	17.3366	17.0237	19.26
CCDC71L	A0AAA9TH50	2	14.3791	14.7892	14.8964	14.3892	14.1935	14.9613	15.1753
AFAP1L2	Q17R10;A0AAA9SM25	19	16.1829	16.2271	16.1926	16.1541	16.1709	16.1079	16.4042
NUCB2	A0AAA9U1W7	16	19.5074	19.5891	19.9552	19.8231	19.8034	19.9201	19.1484
TACC2	A0A3Q1N9Q2	31	17.1495	17.1215	17.3284	16.109	16.6152	16.7518	16.7401
LSR	F6RR15	11	16.3249	16.3459	16.3926	16.1169	15.9524	16.3351	16.4681
GALK2	A0AAA9SZH8	11	16.9409	16.5903	16.7273	17.0402	17.0383	16.8229	16.2133
DYNC1H1	E1BDX8	201	18.4644	18.3652	18.4857	18.3132	18.3245	18.3072	18.6211
SEC23A	F1MVW5;A2VDL8	21	17.6356	17.7645	17.646	17.4435	17.495	17.5471	18.6036
DDX50	F1MMK3	17	16.0245	16.0798	16.2814	16.084	16.1082	16.3073	16.6873
ASRGL1	Q32LE5;A0AAF6YQE1	9	19.8784	20.0867	20.0411	20.0546	19.9761	19.734	19.507
HSD17B4	A0AAA9TEQ9	29	18.1066	18.1869	18.2035	17.6837	17.9848	18.1111	18.0102
ACAT2	Q17QI3	11	19.9747	19.5396	19.8294	20.1968	20.0669	19.775	19.8095
PPP1R21	A0A3Q1LG54	18	18.9091	18.635	18.7643	18.9759	18.9306	18.5485	18.7008
UBA1	A0AAA9SHQ7;A3KMV5	35	20.6165	20.4487	20.6281	20.558	20.6145	20.5245	20.6208
NOC2L	A0AAF6Z2P7;Q3SYU1	15	16.8487	16.9737	17.0225	17.0754	16.9819	17.0097	17.1532
NOLC1	A0A3Q1MIW9	11	17.991	17.8587	17.7471	18.3577	18.0956	18.1173	18.0912
EDC3	E1BEA2	14	15.7912	15.6684	15.5498	15.9881	15.7554	15.9057	15.8356
ADH5	Q3ZC42	9	18.3957	18.0948	17.9909	18.1875	18.4247	18.061	18.5142
MRPS30	P82924	12	16.8178	16.7618	16.6859	17.0106	17.0737	17.1182	16.6773
ETFA	F1MWR3;Q2KJE4	14	19.1946	19.4515	19.441	18.9189	19.0369	19.442	19.2964
PGM3	A0A3Q1LUV2	19	19.0103	18.7737	18.9325	18.8004	19.037	18.8564	18.6594
CHD4	F1N3F6	35	17.4763	17.4669	17.5546	17.4675	17.4271	17.4774	17.3741
SEPTIN8	A0A3Q1LN12;Q0VCP4	11	17.3395	17.0773	17.181	17.0017	17.0416	17.0451	16.4151
RAB3IL1	Q2KJ58;A0AAA9TVL6	8	14.228	14.4781	14.2732	14.2101	14.3203	14.2999	15.8603
HSPD1	G3N0R5;P31081	31	21.7339	21.8306	21.5857	21.9535	21.8469	21.8386	21.666
CENPF	F1N1F8	42	18.0705	17.797	18.0215	18.2712	18.1592	18.124	18.0154
DOCK6	E1BK77	34	15.8566	16.1219	16.0528	15.41	15.7944	15.9102	16.0012
PSMD1	A7MBA2	34	18.7999	18.7118	18.6716	18.8957	18.7248	18.5675	18.5583
HAUS7	A0AAA9SKB6	8	15.2425	15.223	15.4148	15.3703	15.3902	15.3509	15.3484
EWSR1	A0A3S5ZPJ4	6	19.2479	19.2966	19.62	19.1608	19.0856	19.1496	18.8801
NAA35	A0AAA9SHQ2	17	16.9548	16.7569	17.0473	16.9814	16.7873	16.7577	16.7258
CARS1	A4FUC8	44	20.5515	20.3447	20.4853	20.6518	20.5922	20.4263	20.5735
ALAD	Q58DK5	16	19.3172	18.7406	19.1189	18.8438	19.2937	19.2108	20.2437
DDX10	Q08DT0	19	16.2361	16.339	16.37	16.6066	16.3292	16.5187	16.6634
SF3B2	F1MC31	25	18.4609	18.5243	18.7577	18.5611	18.5312	18.663	18.6197
GTPBP4	A0AAA9T915	24	16.8261	16.8742	16.9029	17.1443	16.7988	16.8871	16.8521
APIP	Q0VCJ2	6	16.3015	15.6589	15.7166	16.1542	16.1557	16.2038	16.3107
PRPF8	A7Z025	80	17.8946	17.9887	18.1471	17.8336	17.834	17.9621	18.0215
PRODH	Q148G5;G3N3Y2	13	15.7747	15.3362	15.4201	15.8352	15.7725	15.7888	14.8149
ENAH	F1N214	16	18.1823	18.5343	18.5356	17.3722	17.5218	17.7066	18.7415
ENO1	Q9XSJ4;F1MB08	18	22.9182	22.9248	22.7432	23.0132	22.9207	22.7299	23.2032
ISG20L2	Q2YDK1	7	14.7961	14.7307	14.7648	15.3828	15.1265	15.0834	15.4472
MED13L	A0AAA9T6T6	9	14.8804	14.7864	14.7909	14.4637	14.8038	14.8297	14.5746
CARS2	Q2KIF8;A0AAA9SEB2	6	14.5338	14.752	14.5515	14.6708	14.428	14.6898	14.2184
MMUT	Q0III1;Q9GK13	21	18.5532	18.5965	18.7104	18.0637	18.5404	18.6049	18.5324
NCOR1	A0AAA9RZH3	10	17.3354	17.2519	17.6467	17.4662	17.7115	17.6849	17.7948
REEP5	Q29RM3;F1MDM4	8	20.0405	19.9017	20.1013	19.6705	19.885	19.9828	18.8694
PDS5A	E1BKG4	35	17.2801	17.3676	17.4744	17.2995	17.1801	17.2643	17.4255
POLA1	A0AAA9THK8	27	16.0338	16.0794	16.1941	16.2357	16.3087	16.2538	16.3574
TOR1AIP2	A5PKH0	10	16.0311	16.2806	16.3529	15.4434	15.5757	16.1165	15.9627
EBP	Q3ZBT8	2	19.1193	19.5632	19.5789	18.3355	18.8551	19.3647	19.1803
LIG3	F1MQY1	25	16.4957	16.6473	16.5392	16.4447	16.6145	16.7307	16.6534
LENG8	A0A3Q1ML38	8	14.2837	14.4617	14.6044	14.2458	14.2393	14.7239	14.7111
OPA3	G3MYY7	2	13.3619	13.6052	NA	13.3893	13.6073	13.3289	NA
DNAJC14	Q95J56	3	15.8558	15.7776	15.8514	15.2633	15.7772	15.8421	15.8379
UMPS	P31754;A0AAA9T4P2	17	17.8647	17.8688	17.7258	18.2453	18.1913	17.993	18.4264
GDF6	P55106;A0A452DKC3	8	14.6775	15.1777	15.4013	NA	13.0971	13.2784	14.2245
FAT1	A0A3Q1M5W5	49	16.7263	16.8826	16.4993	16.5668	16.5166	16.8088	17.5991
YKT6	A0AAF6YH77;Q3T000	11	18.1832	17.9685	17.9998	18.463	18.2269	18.0123	18.0365
LMNA	F1MYG5	39	20.4116	21.0598	21.0463	19.9088	20.2359	20.576	21.4391
ALDH5A1	A0AAA9TXM1	20	20.2628	20.4992	20.6142	19.5643	19.7568	20.179	20.2421
FUT4	Q8HZR3;F1MDG4	6	15.7918	15.2065	15.6973	14.8945	15.0969	15.6164	15.3511
TPCN2	A0A3Q1MD89	8	17.4302	17.3147	17.3225	17.6323	17.5133	17.6144	17.2698
CCAR2	E1B9H3	18	18.5152	18.6663	18.9113	18.7298	18.6815	18.5511	19.029
FTO	A5D798	12	15.61	15.7495	15.5285	15.7547	15.8166	15.718	16.2802
CCDC124	Q2TBV6	11	17.304	17.1646	17.4384	17.3655	17.146	17.1102	16.9703
PABPC1	P61286	15	21.4416	21.4845	21.4257	21.6311	21.4827	21.4256	21.3774
UBE4B	A0A3Q1MHZ2	36	17.0246	16.7293	16.7928	17.0266	16.9436	16.764	16.6019
GNB1	P62871	5	19.1732	19.0272	19.0456	18.7209	18.9071	18.8956	19.3517
DNAAF5	G3N314	17	15.8063	16.0891	15.801	16.1501	16.0107	15.8531	16.444
TPK1	Q5E9T4	4	17.2192	17.2138	17.2807	17.2981	17.4815	16.8855	16.6586
PGK1	Q3T0P6;A0AAA9SR81	30	22.1447	22.0459	22.0121	21.8899	22.0803	21.9379	22.0745
FSCN1	Q3MHK9	25	22.1744	22.0377	21.9304	21.1494	21.4668	21.6133	21.1852
VPS35	Q2HJG5	30	18.5548	18.6498	18.5289	18.6834	18.6456	18.255	18.4263
HEATR6	E1BHR5	12	16.6137	16.7991	16.8609	16.4468	16.6216	16.5541	16.8609
CRYZL1	A0AAA9RYU5;Q59A28	10	18.4355	18.0624	18.3172	18.3351	18.5599	18.1976	18.4454
AKR1B1	P16116;A0A493UA87;A0A3Q1MBL5;A0A3Q1M9Q1;A0AAA9TRD4	25	23.7549	23.4799	23.4931	23.6738	23.7154	23.4129	22.7674
ERBB2	A0AAA9SBR4	20	16.1758	16.4711	16.6464	15.2341	15.6697	15.9608	16.1401
FNDC3B	F1MPN0	18	16.1083	16.2809	16.1976	15.971	16.1168	16.188	16.581
CTU1	E1BII1;Q0VC66	6	14.7838	14.2554	14.4914	15.5027	14.9122	14.5751	14.6847
LAMC1	F1MD77	51	18.9022	19.2463	18.7584	18.5275	18.5578	19.1196	20.9528
SMPDL3B	A6QQN6	16	19.0935	18.031	16.4608	21.3759	19.5147	17.7728	17.261
ZMYND11	A0A3Q1LJL9	6	14.5831	14.5587	14.5431	14.4128	14.4946	14.4188	14.0076
DDX41	F6QYF9	24	15.8545	16.1236	16.1568	16.0259	15.9646	16.0556	16.1213
LSS	F1MTJ9;P84466	24	17.8488	18.005	17.9093	17.0794	17.3667	17.8519	17.5822
NUB1	Q8MJ87;F6QQ96	10	15.7424	16.6223	16.378	16.6819	16.2904	16.5231	16.2153
MMS19	E1BP36	32	17.2931	16.9103	17.3186	17.2268	17.4477	17.2878	17.455
DFFA	Q0VC37	10	16.5081	16.8376	16.8458	16.37	16.2408	16.1375	16.6803
ITPR3	Q8WN95;E1BKE7	72	17.4651	17.4479	17.6236	16.8765	17.1382	17.3885	17.0749
USF1	Q6XBT4	2	14.3012	14.6602	14.3144	14.4946	14.2952	14.736	14.8148
FHIP2A	G3X6C8;A0JNG7	13	15.6713	15.7673	15.8446	15.8981	15.8956	15.7882	15.4428
MAVS	A0AAA9S9F2	7	14.4535	14.4319	15.0276	14.3114	14.4986	14.6605	14.3011
TTC38	A0A3Q1M6S8	9	15.315	15.3123	15.4441	14.3311	14.8916	14.7153	14.9891
C3	Q2UVX4	23	16.9412	16.324	14.9147	15.1009	15.6481	14.4695	14.8621
POFUT2	F1MPI4	10	15.5711	15.4946	15.488	15.1565	15.3423	15.7082	16.3222
ARFGEF1	E1BP90;O46382	30	18.0212	17.7569	17.8886	18.1967	18.3447	17.9057	17.9582
ZNF330	Q32LC9;E1BD90	7	15.6427	15.3503	15.4127	15.7225	15.4926	15.2879	15.2414
GNL3L	Q3T0J9;A0A3Q1MFA8	22	16.5699	16.6288	16.6341	16.8636	16.7505	16.9989	16.6228
BIRC6	E1BE13	73	17.2603	17.1628	17.1265	17.3788	17.2369	17.1087	17.0605
LASP1	Q3B7M5	17	18.726	18.9048	19.0471	19.0464	19.1873	18.8213	19.799
VARS1	A0AAA9T803	42	19.5278	19.3798	19.4797	19.8327	19.6497	19.4682	19.5564
TRAPPC8	A0A3Q1N5L8	29	16.8933	16.771	17.0267	16.7574	16.7609	16.7619	17.0614
RBM17	A7MB77;A0A3Q1M2Z2	11	16.6091	16.9231	17.0902	16.8436	16.7428	16.9363	17.3769
GNB2	P11017	4	19.8726	19.8774	19.7393	19.6134	19.6114	19.6374	19.9433
ZFYVE1	E1BPK7	7	14.6882	14.6388	14.8013	14.2314	14.4122	14.3065	14.5798
FGD4	A0A3Q1LSC0	24	17.9	17.5305	17.9037	17.5638	17.7051	17.6835	16.9566
ERCC6L	A6QQR4	22	16.2225	16.2361	16.4071	16.6749	16.6901	16.5836	16.5058
VAT1	F1MUP9	18	19.8339	20.1597	20.055	19.1114	19.3449	19.6418	21.2397
MSRB3	A0AAA9TIS6	6	15.4778	15.7247	16.063	15.1712	15.4875	15.2976	15.0935
HGS	A0AAF6YHD5;Q0V8S0	15	17.1636	16.9896	17.1613	16.9479	16.9666	16.9889	17.1703
DSP	E1BKT9	163	18.9368	19.0878	19.2744	18.8176	19.0094	19.0659	18.8602
RFFL	A0AAA9SVB5	6	15.3574	15.288	14.9792	15.2622	15.1545	15.208	15.4081
SNU13	Q3B8S0	7	19.0291	19.136	19.2592	19.0077	19.0781	19.2482	19.1412
TRMT1	A0AAA9SJY9	18	16.2397	16.0271	15.9656	16.5995	16.4752	16.172	16.0383
TPP2	A5PK39;A0A3Q1M996	42	17.9404	17.7489	17.7693	17.8369	17.7503	17.643	17.7404
CENPP	A0A3Q1N198	2	14.0473	13.8583	14.3796	14.7357	14.6062	14.4808	14.555
STAT2	E1B8Z4	16	15.4358	15.5672	15.7294	15.4146	15.4646	15.5767	15.8434
UBA6	F1ME38	26	18.1481	17.9942	17.8377	18.0898	18.0338	17.7814	18.0875
TADA2B	G5E6P9;G3MYD1	4	14.6964	15.1208	15.1506	14.3784	14.5747	14.8724	14.7961
MMAA	A6QQI8	7	15.2399	15.566	15.201	15.2022	15.0442	15.3787	14.7962
IQSEC1	A0A3Q1MCH9	6	14.7492	14.5314	14.6133	14.4777	14.6285	14.5712	14.87
IQGAP3	A0AAF6DLK2	45	17.3791	17.1057	17.1636	17.7597	17.6428	17.3964	16.9919
EXT2	A0A3S5ZPA0;O77783	6	16.1815	16.142	15.9658	15.9125	15.5933	16.1859	16.0024
CRELD1	A0AAA9SSY0;Q5EA46	10	16.4949	16.4203	16.4922	16.2453	16.2863	16.346	16.0944
CTSF	Q0VCU3	5	15.6108	14.6943	14.7376	15.6619	16.2667	16.2627	15.4068
PSMC2	Q5E9F9	27	19.3022	19.1918	19.2267	19.5001	19.3022	19.0699	19.2157
MTOR	E1BFB4	43	15.9526	15.9618	16.0599	15.9039	16.0207	15.8942	15.964
ACTN1	Q3B7N2	32	19.7266	19.696	19.9955	19.2354	19.4885	19.5026	19.9386
ACTN4	A5D7D1	44	22.1922	22.1472	22.3613	21.8595	22.0657	21.9769	22.0044
SUPT4H1	Q3SYX6	2	18.1566	17.9877	18.1146	17.9918	18.0665	18.172	17.9332
ELMOD2	Q08DZ3	6	16.2401	16.5761	16.5816	16.1592	15.8522	16.1381	16.1434
ALDH3B2	A0A3Q1LKF2	7	14.955	15.7238	15.5247	14.9883	14.7338	14.8225	14.3145
URB1	F1MZA7	47	16.2498	16.3332	16.2445	16.3289	16.2715	16.3731	16.3129
WDR62	A0AAA9S2T5	13	14.2053	14.3877	14.548	14.8767	14.6984	14.8602	14.5314
LMNB2	F1MJI7	33	18.4647	18.609	18.7848	18.2342	18.3552	18.6385	18.6119
IAH1	Q3SZ16;A0AAA9TS64	8	17.4655	17.1554	17.3738	17.0923	16.9422	16.9078	17.1753
WDR11	A6QLS8	29	17.3715	17.2849	17.4488	17.351	17.3028	17.3502	17.2514
NUP85	Q3ZC98	15	16.37	16.2986	16.4477	16.3601	16.4237	16.3888	16.2011
ITGA6	A0A3Q1M8K4	39	21.1923	21.3639	21.2829	20.4899	20.6616	21.1773	21.2614
GRWD1	Q1JQD2;A0AAF6YGY8	13	17.8177	17.4643	17.584	18.2642	17.9715	17.8802	17.4943
PELP1	A0A3Q1MDL1	18	17.3433	17.4756	17.5884	17.2145	17.3216	17.2943	17.3426
PTPRA	E1BPA0	11	15.2278	15.6755	15.3441	14.957	14.8394	15.1384	15.839
GPAT3	E1BGF8	19	18.2726	18.2061	18.3968	17.9944	18.0775	18.4017	17.448
GPAT4	A3FPG8;A6H7D4	12	16.2316	16.1393	16.2135	15.9754	16.1867	16.3266	16.027
HECTD3	F1MJS5	21	16.7281	16.6697	16.7997	16.6622	16.6616	16.5643	16.61
PCM1	A0A3Q1LX22	16	16.4089	16.5801	16.4621	16.8057	16.6509	16.4561	16.6681
RPA2	A0AAA9TRL7;A0A3Q1MFW6;F6RU89;A0A3Q1MGF7	6	17.2884	16.8982	17.05	17.4351	17.2927	17.2899	17.3047
TLN2	F1MQI1	40	14.765	14.8381	14.741	14.6476	14.567	14.7172	16.7615
NELFCD	F1MW69	16	17.4875	17.839	17.9799	17.44	17.4519	17.6367	17.8405
ADAMTS9	E1BI72	19	15.636	15.6603	15.4886	14.765	14.611	14.9977	16.5391
NID1	A6QNS6	32	17.622	17.9143	17.2155	17.2319	17.4166	17.8026	19.5854
TRRAP	A0AAA9SVS0	67	21.024	21.0549	21.1855	20.74	20.815	21.0155	21.0039
DNMT1	Q24K09;F2Z4J5	33	18.7301	18.4279	18.6058	19.1489	18.9389	18.7511	19.0101
WRAP73	A0AAA9S0S2	2	15.4404	14.8459	15.3133	14.5696	15.4287	15.3726	15.0107
RPS3A	Q56JV9;G3N262;A0AAA9RXK0;A0AAA9TAX3;A0A3Q1N7H0;A0AAA9ST32	19	21.4863	21.2746	21.3719	21.7147	21.6038	21.4726	21.2758
ARFGEF2	A0AAA9T9B3	34	18.0466	17.8688	18.0561	17.8495	17.8471	17.7107	17.531
HEATR5A	E1BGU0	21	15.744	15.6904	15.7854	15.5362	15.6224	15.3993	15.2519
MMS22L	A0A452DHT7;E1BGH8	12	15.0143	15.0629	15.1124	15.0987	15.2399	15.3647	14.8803
ALG1	F1N2J7	10	15.7402	15.8344	15.8649	15.5736	15.6291	15.7336	15.5677
MFSD5	Q0VC03	6	16.6429	16.5926	16.7388	16.2196	16.2819	16.6733	16.1962
LTN1	F1MTS8	31	17.6904	17.37	17.5585	17.9929	17.787	17.6003	17.5683
SHROOM3	A0A3Q1NCP3	12	17.749	17.599	18.0257	17.3324	17.5985	17.8117	17.1749
PARP1	P18493;A0AAA9SJL9	42	20.2548	20.4937	20.4753	19.7153	20	20.2572	20.157
SQLE	A5D9A8	12	16.9498	16.6684	16.3841	15.7746	16.4464	16.7901	16.3851
PLBD2	F1MIH9;Q2KIY5	20	22.0887	21.4688	21.2058	20.2204	20.6161	20.7871	19.7966
ISYNA1	Q2NL29;A0A3Q1MTD4	15	18.0928	17.7765	18.0409	17.5445	17.7062	17.5977	18.6242
NEPRO	A0AAA9SA39	3	13.5102	13.3194	13.3635	13.6596	13.7901	13.6284	13.7621
PDCD11	A7MB10;G5E5C4	58	18.7723	18.6728	18.7776	19.066	18.9347	18.9917	18.7954
WFDC2	G3MX65	2	20.7344	18.1369	15.4952	19.3685	21.0226	18.2797	17.7848
NADK	F1MCL6	8	15.9646	15.5729	15.966	16.405	15.9342	15.7153	16.1497
BTBD3	A0A3Q1N6X6	3	15.0658	14.8402	15.0817	14.5716	14.8615	14.794	14.4846
SBF1	G5E5Q8	23	15.753	15.5641	15.683	15.6083	15.609	15.5513	15.4882
KDM2A	F1N735	22	19.6164	19.7804	19.7495	19.4254	19.5692	19.598	19.9114
CHID1	Q5EAB4	11	17.7629	17.8328	17.8093	17.3478	17.4723	17.8513	17.3887
ATP1A1	Q08DA1	25	19.94	19.7945	19.6922	20.7971	20.4299	20.3126	20.6658
KMT5C	A0A3Q1M6A7	5	14.6538	14.9421	15.2234	14.0455	14.1059	14.599	14.1074
IPO7	E1BGE5	27	18.3168	18.2386	18.0744	18.7079	18.5323	18.2431	18.2206
ACTR1B	A4IFE3	5	14.3708	14.3064	14.7282	14.5555	14.8556	14.6439	15.5838
ACTR1A	F2Z4F0	12	18.7452	18.601	18.6117	18.6323	18.5109	18.4454	18.6911
DUSP28	A0A3Q1MH98	3	14.6667	14.3292	14.5945	14.3878	14.1291	14.4313	14.5131
SGF29	E1BN74	2	15.2445	15.2747	15.5651	14.9679	15.1752	15.3936	15.4593
ERLIN2	Q1RMU4	13	18.2503	18.5656	18.389	17.9181	17.9129	18.2386	18.6396
DYNC1I2	F1N7H7;Q0III3	16	17.5095	17.3539	17.5735	17.5183	17.5422	17.4267	17.759
LMBRD2	A0AAA9T184	4	16.4401	16.7307	16.7279	16.3205	16.0934	16.0486	16.0349
ERLIN1	G3N0U8	10	16.9389	17.2973	17.091	16.9896	16.9689	17.1196	17.2855
CASK	A0AAA9TVT5	19	15.7246	15.3592	15.0438	15.4946	15.5856	15.6154	17.266
CXXC1	Q5EA28	7	16.0824	16.0125	16.1592	16.0724	16.2368	16.1567	15.8667
JMJD6	A0A452DJR2;Q58DS6	14	16.5352	16.3818	16.3872	16.9918	16.6902	16.6465	16.3612
RNASEH2A	Q2TBT5	7	15.8637	15.4992	15.6086	15.8948	16.0367	15.7313	15.671
PLRG1	Q2KID6;A0AAF6ZAG7	16	16.4853	16.5688	16.9337	16.7176	16.4644	16.687	16.7961
HIP1R	A0AAA9SBB5	40	18.2966	18.1747	18.2922	18.0988	18.1398	18.2229	18.9388
ZFAND5	A7MBA8	3	13.0427	13.6486	12.9611	13.8564	13.0224	12.6922	12.3795
AHSA1	Q3T0G3	16	18.2179	17.708	18.0424	19.0381	18.8358	18.361	18.2652
TUFM	P49410;A0AAF6Z672	25	20.5586	20.5626	20.4654	20.6319	20.6288	20.6627	20.2301
BCAR3	A0A140T848;Q58DL5	22	15.8955	15.9198	15.9038	15.7737	16.0326	16.0498	16.2216
AP1G1	A0A3Q1M952	18	17.9506	17.9083	18.2059	17.9016	17.93	17.9422	17.6785
AP1G2	F6QYT8	27	18.5731	18.4546	18.6316	18.3285	18.4076	18.3063	18.0006
FBXO6	Q3SX24	11	17.0444	17.2806	17.4507	16.7541	17.0929	17.0451	16.7214
RECQL	A0AAA9S5G9	15	14.8977	14.855	14.9223	15.0334	14.9457	14.7798	15.158
SEPTIN5	Q0VC68	10	16.2643	16.518	16.4289	14.6056	15.5221	15.7744	15.5613
RIC1	F1MKR0	13	16.6655	16.775	16.9259	16.4292	16.4282	16.6137	16.9079
TBC1D9B	A0A3Q1LTG9	15	16.3107	16.5717	16.6653	15.9205	15.9788	16.0175	16.0263
SCP2	F1MV74;P07857	23	21.3417	21.6224	21.7411	21.0846	21.2158	21.3505	20.7389
SND1	Q863B3	47	20.9939	20.9326	21.0852	20.9215	20.9432	20.8907	20.6575
C1GALT1	A0AAA9T2P8;Q0VC84	13	16.8489	16.9081	16.864	15.8379	16.3421	16.9648	16.9445
NES	A0AAA9TRB0	34	15.3865	15.1681	15.0975	15.4369	15.1722	15.1856	17.3959
NOL6	A5PJU0	23	16.6659	16.4507	16.6289	16.9897	16.8944	16.9629	16.779
SEC14L4	A0A3Q1LYF4	7	15.9841	15.8068	16.1616	15.246	15.7166	15.3778	15.215
SAMHD1	Q0VCA5	19	16.6815	16.7259	16.6779	17.249	16.9892	16.7333	17.4964
LETM1	F1N3R4;Q0VCA3	26	18.7138	18.6908	18.6228	18.6316	18.6558	18.841	18.2918
MAP2K6	Q5E9X2	3	15.0079	15.0951	14.831	14.1416	14.7039	14.6031	14.5177
DCPS	Q8MJJ7;G5E535	6	16.6314	16.3737	16.5612	16.7332	16.6845	16.4892	17.1117
HERC1	F1MNS0	50	16.9052	16.7719	16.8741	16.6075	16.6597	16.7045	16.5814
WBP11	E1BNM6;A0A3Q1MQG9;A0AAA9TF65	17	16.3719	16.2349	16.4222	16.3801	16.3285	16.3136	16.5709
ATP6V0D1	A0AAF6Z0J8;P61420	12	19.0456	19.2126	19.0515	18.5779	18.8302	18.8734	18.5615
PC	Q29RK2	47	19.7037	19.7863	19.9201	19.2032	19.4978	19.8379	19.1412
CHMP4A	A2VDY3;A0AAA9T8M2	8	17.3569	17.1454	17.2434	17.5795	17.3479	17.1905	17.0464
UHRF1	A7E320	15	15.6473	15.5188	15.6198	16.1557	15.7161	15.9715	16.0064
PITPNB	Q9TR36	13	17.8554	17.8011	17.7265	18.0297	17.961	17.6998	17.9564
NUTF2	Q32KP9;A0AAF6YPQ4	3	19.1244	18.7402	19.0094	19.0616	19.1437	18.9002	19.1837
CUX1	F1N693	13	16.7775	16.7255	16.9578	15.976	16.536	16.8116	16.7878
PLXNB2	G3X755	35	19.4651	19.2936	19.2802	19.1125	19.16	19.4279	19.963
MYH9	F1MQ37	109	21.2439	21.3908	21.4489	20.7662	21.0811	21.2314	21.804
ACSL3	F1MEX9	31	19.6318	19.5268	19.3283	20.4683	20.2186	19.8985	19.3778
SMPD4	F1MBU2	24	17.094	17.2047	17.2311	17.1116	16.9949	17.2286	17.0347
COMMD7	Q3MHX1	6	16.6455	16.3583	16.4776	16.523	16.6964	16.2401	16.4608
DAD1	Q5E9C2;A0AAF6Z6H0	4	20.2358	20.3929	20.2638	20.0098	20.1747	20.3524	20.1678
FAM76B	A0AAA9SAS8	2	15.8045	15.8739	16.0141	15.5028	15.7928	16.1147	15.8848
FAM76A	F1N6L6;Q5EA89	2	13.3322	13.0971	13.4726	12.7738	12.9862	12.5721	13.4073
SERPINB9	F6Q447	12	18.001	19.095	19.2147	14.0216	14.4629	15.6746	17.6472
SERPINB6	O02739;A0A3Q1MJK1;A0A3Q1NAJ0	5	15.1759	16.2555	16.2104	15.91	15.5958	14.9872	18.3786
MIOS	E1B899	15	15.7766	15.7232	15.9155	15.6938	15.5965	15.7663	15.8439
MYO1D	A0AAA9RSU9;Q17R14	51	18.3265	18.5395	18.5919	18.2023	18.3214	18.2672	18.0553
CCDC97	A3KMW0	5	14.8922	14.7745	14.7002	15.0104	14.8663	14.9032	14.6556
TEFM	F1MDZ0;A6QPR9	7	15.6272	15.325	15.0531	15.8451	15.6541	15.7692	14.9753
SPHK2	E1BJM1	12	16.1909	16.4904	16.4779	16.3689	16.339	16.2179	16.4767
TJP1	A0AAA9S4Y0	63	19.095	19.1595	19.2043	18.7494	18.9456	19.1187	19.4669
LIG1	A0A3S5ZPU0	22	16.7129	16.3662	16.196	17.4359	16.9338	16.7595	16.9997
IGF2R	F1MIE6;P08169	43	16.3874	16.4491	16.2845	16.1753	16.1245	16.3475	17.7805
CDC42BPG	A0A3Q1MA37	21	16.2716	16.177	16.3355	15.9884	16.3183	16.2846	16.273
NET1	Q3ZC77	11	15.9329	16.0777	16.1258	16.0178	15.9705	16.0322	16.1902
ACADS	Q3ZBF6;A0AAA9SUD1	13	17.5956	17.8242	17.7722	16.9977	17.4975	17.7918	17.2539
ATXN10	Q2TBW0;A0AAA9SI20	18	16.3285	15.9788	16.093	16.7132	16.6984	16.2131	17.1182
SERPINC1	F1MSZ6;P41361	9	15.1708	15.5596	15.2882	14.6788	14.6141	14.6529	16.3234
KIAA0930	F1MEV2	9	16.1591	16.0347	15.9566	16.2166	16.0606	15.9078	15.3762
MRPL24	Q3SYS0	10	16.3425	16.0569	16.1422	16.3131	16.3672	16.5717	16.0493
EMC1	A0A3Q1M175	35	18.5013	18.5191	18.3725	18.468	18.3768	18.534	18.3648
ATXN2L	E1BJ59	24	17.7111	17.634	17.698	18.1394	18.1168	17.8594	17.9607
ZC3HAV1	E1BCF8	27	15.4968	15.2273	15.1418	14.2674	14.4062	15.2564	17.4462
TBC1D10B	F1MJZ7	10	14.5647	14.8131	14.6816	13.9633	14.3826	14.3999	14.749
AFDN	A0A3Q1M9W3	57	18.122	18.2093	18.3075	17.9273	17.9733	18.0564	18.0243
PTK7	F1MWK8	22	17.7649	17.6997	17.4683	17.5196	17.512	17.5387	19.3023
DLD	F1N206	14	19.9961	19.8995	20.1177	19.9833	19.9999	20.2522	19.8979
ATP11A	A0A3Q1MCZ4	3	NA	NA	12.7141	13.4737	13.2083	13.0032	14.6286
CTPS2	A0A3Q1LLS1;Q1RMS2	12	15.8301	15.5594	16.0478	15.6888	15.7494	15.7079	15.8183
HNRNPR	A0A3Q1MI86	17	19.7499	19.9233	20.1714	19.4226	19.6745	19.9975	19.9224
TERF2IP	Q0VCT3	6	15.9441	15.9109	15.7006	15.4619	15.6289	15.7951	15.7455
LHPP	Q0VD18	8	15.3874	14.6067	14.715	15.2499	15.8882	15.1674	15.1414
RPS8	Q5E958;A0AAF6Z178	11	22.1754	22.5734	22.1021	22.4445	22.262	22.2462	22.2461
BROX	A0AAA9T5V2	4	14.4629	14.1424	14.589	14.634	14.2739	14.0594	14.3377
PSMC6	Q2KIW6;A0A3Q1LQF0;A0AAA9SEL8	18	18.7297	18.4989	18.6757	18.7801	18.6814	18.6711	18.5403
HSP90AB1	Q76LV1;G3N2V5;A0A3Q1LTQ4	32	22.8537	22.6549	22.6674	23.2733	23.1013	22.9328	22.9166
RPSA	P26452	13	21.9639	22.144	22.0761	22.1858	22.035	21.9403	22.1397
ACO2	P20004	37	20.8212	20.917	20.9277	20.7258	20.9157	20.9357	20.7627
AHNAK	F1MCK2	222	21.6661	21.6027	21.551	21.4212	21.5001	21.8303	23.1336
GOLGA4	A0A3Q1N365	91	17.5948	17.5583	17.7746	17.5364	17.6015	17.6627	17.175
EIF2S1	P68102	16	19.6093	19.644	19.613	19.7654	19.637	19.4019	19.6026
ABCE1	A4IFE6	22	18.6562	18.3122	18.3313	18.9873	18.7557	18.583	18.6692
GLG1	A0AAA9SE43	46	18.1449	18.1658	18.0899	17.6821	17.9076	18.1658	18.8671
LARS1	A0A3Q1N108	50	17.5564	17.4043	17.3212	17.8271	17.6843	17.4932	17.6026
TYRO3	A0A3Q1LRR9	11	15.6763	15.3378	15.581	15.2232	15.2052	15.3433	15.6334
FARSB	A0AAA9SPL5	22	18.8356	18.7246	18.8436	19.0984	18.8261	18.8213	18.551
ATP5F1C	P05631	8	20.5926	20.8247	20.5035	20.4817	20.5651	20.7303	20.441
HNRNPM	A0A3Q1MJD5	29	21.3878	21.8643	21.9167	21.4933	21.5387	21.8413	21.8402
PAIP1	G3MZ83;F6RWP3	10	17.4478	17.3119	17.2332	17.6645	17.5153	17.487	17.2253
ATP6V0A2	O97681	15	16.8334	16.5282	16.5646	16.6184	16.7072	16.9195	16.3002
RAB28	Q3SWY9	5	15.9989	15.809	16.0201	15.8525	16.0412	15.9667	15.758
PSAP	P26779;A0A140T8C6	29	23.3361	22.7717	22.9478	24.1636	23.5029	22.8643	22.6264
MARS1	F1MDW1;Q2T9L8	26	18.6027	18.3787	18.497	18.8068	18.6115	18.6321	18.5621
MIPEP	A0AAA9SQY1	21	16.3503	16.2232	16.3318	16.2995	16.2686	16.5179	16.322
GTF2F2	Q2T9L9	9	16.1239	15.9243	15.8954	16.5221	16.1162	16.0667	15.8511
GNL3	E1BMI6	18	17.0544	16.907	16.9762	17.5046	17.325	17.4692	17.1932
EIF2A	A0AAA9SB04	24	18.6482	18.3871	18.4837	18.8155	18.6488	18.5623	18.4574
SGSH	E1BFX4	12	17.3576	16.9582	15.6696	16.138	16.3871	15.8922	14.8164
UBE2L3	Q3MHP1	8	19.4721	19.1734	19.198	19.5384	19.3878	19.1018	19.0783
POP4	A0AAF6YJ89;Q2KIB9	5	14.1227	13.8722	14.0176	14.5705	13.9535	14.178	14.4316
ANKRD27	F1N642	14	15.12	15.442	15.4595	14.6613	14.8292	14.612	15.362
RNF141	Q32L15	3	15.563	15.0543	15.2859	15.6197	15.7509	15.4723	14.9486
NIF3L1	Q05B89	10	16.0094	15.7027	15.8431	16.2512	16.0564	15.8449	15.9386
HSP90AA1	A0A452DI85;Q76LV2;A0AAA9ST28	34	23.0408	22.8529	22.8723	23.4804	23.2772	22.9186	23.0322
ascc3	E1BNG3	30	15.971	16.0039	15.9855	16.0106	15.9855	15.9796	16.0296
SLC30A10	G3X6F6	6	15.2095	14.8471	14.6074	15.0986	15.1304	15.3137	16.7926
CPT2	Q2KJB7;F1N1M7	23	17.3501	17.6087	17.5799	16.7999	17.0356	17.4082	17.3977
MYH14	A0AAA9S4Q7	72	18.1133	18.8647	18.8929	15.2289	16.1162	17.0683	17.5518
PWP2	E1BL00	15	16.7001	17.1585	16.9236	17.086	17.0743	17.2313	17.0812
WNT6	F1MN70	6	15.3516	15.1628	15.1216	15.0677	15.2739	15.3808	16.0753
UTRN	A0AAA9TJR2	72	17.7128	17.8048	17.8652	16.977	17.4663	17.8571	18.9523
RHOT2	Q5E9M9;A0AAF6YME1	10	16.4691	16.4284	16.542	16.5151	16.451	16.6907	16.401
SORBS2	A0A3Q1NDV3	17	16.5781	17.1387	17.3066	14.3011	14.9197	16.0704	15.7021
HGH1	F1MW97	13	17.168	17.3872	17.3959	17.4763	17.3324	17.319	17.2356
KCTD9	A0A3Q1M937	3	15.3831	15.5538	15.0071	15.6166	15.2143	15.2397	14.4027
RALGAPB	F1MCG4	9	14.5663	14.3185	14.5401	14.3619	14.4658	14.4463	14.53
JMJD8	A0A3Q1N4Y8	4	19.7582	19.7041	19.6517	18.8032	19.1004	19.1016	19.3729
UQCRC1	G1K1X0;P31800	19	19.707	19.8031	19.6032	19.7699	19.8492	19.8719	19.5247
XPO4	F1MVW4	24	16.3891	15.9523	16.0915	16.482	16.1773	16.1692	16.0244
SLC39A4	Q1KZG0	5	17.3807	16.339	16.4274	17.4784	17.8896	17.1601	16.1361
DTL	A0A3Q1MLX1	14	15.4376	15.1426	15.2274	15.9948	15.9424	15.6885	15.2593
LOC107132045	A0A3Q1M8G4	2	NA	NA	14.9513	15.0315	14.7708	15.3116	14.6217
MIDEAS	E1BI11	10	14.7929	15.0387	15.2617	14.6205	14.8121	14.9766	15.0953
DOCK9	A0AAA9RS28	63	17.2912	17.2546	17.2621	17.0427	17.2024	17.2641	17.5408
CSAD	E1BP41	14	16.9689	17.1609	17.2439	16.3498	16.5551	16.6479	17.7033
MYH10	Q27991;A0AAA9SL38	95	18.8728	18.995	19.0699	18.6234	19.0227	18.8754	18.8447
GUK1	P46195	10	16.5664	16.255	16.3904	16.6579	16.5413	16.4777	16.5029
SUGP2	E1BE55	11	16.1979	16.3078	16.227	16.1557	16.4727	16.5987	17.0293
ATP5PF	A0A452DJ42;P02721	3	19.4625	19.7343	19.3177	19.139	19.4474	19.3331	19.1832
SSH2	E1BPN5	10	15.5362	15.8706	15.6607	15.1386	15.6274	15.5074	15.2866
HADHA	Q3SZ00	22	18.3798	18.9989	18.833	16.9048	17.3871	17.9739	18.0618
ABCB7	E1BPL3	12	16.8033	16.6983	16.7884	16.6101	16.5056	16.8306	16.5534
CCDC90B	A0AAA9TGQ0	3	15.6466	16.1804	15.6435	16.053	15.9018	15.8601	15.4183
NUP205	A0A3Q1N4S4	55	18.8131	18.9443	18.9408	18.7646	18.8343	18.9519	18.9494
SLC38A10	A0A3Q1LQW5	11	15.702	15.7498	15.6862	14.9339	15.3299	15.7613	15.6051
NHP2	Q5E950	4	17.7211	17.9334	17.9242	17.8243	17.7421	17.871	17.8415
UBA2	A4FV12	19	17.9114	17.7409	17.7093	18.1581	17.9634	17.7237	17.9782
CHTF18	E1B8Q4	17	16.2699	16.5928	16.6593	16.6913	16.6599	16.7462	17.1287
GGTA1	P14769	13	17.3714	17.713	17.9229	17.2485	17.3123	17.6297	17.261
RPS6KA1	A0AAA9SJ92	17	16.6286	16.6103	16.6776	16.8334	16.8518	16.8246	17.0984
CCDC93	A4IFE0	22	16.8585	16.7711	16.7378	17.0984	17.0322	16.7246	16.8127
MGAT1	Q5E9I4	9	15.7017	15.6461	15.7116	15.3339	15.5782	15.7872	15.9585
MORF4L2	A6H7C1	4	15.592	15.061	15.5535	15.6469	15.6	15.4173	15.8693
SHROOM2	F1MCL7	6	14.5734	14.7122	14.8505	14.2572	14.8655	14.7264	14.8051
POLR2H	F2Z4H3	5	18.2507	18.4733	18.2572	18.5775	18.2997	17.9874	18.1361
EML4	A0A3Q1LLV8	36	18.3572	18.3746	18.4146	18.0937	18.2531	18.1472	17.7695
LRP2	F1N6H1	151	20.2048	19.8082	19.8501	20.8364	19.8927	19.7716	20.3596
PRPH	A6QQJ3;A0AAF6Z4F8	31	18.7562	18.5212	17.834	17.8337	17.45	18.2595	20.9508
THOC2	F1N153;G3MZE5	31	16.9244	16.9207	17.2005	16.6983	16.8491	17.1391	17.1907
CDK6	E1BC36	7	13.9165	14.1336	13.5104	13.9822	14.068	13.8572	15.357
EHD4	E1BJV0	18	17.3324	17.6648	17.5954	17.0351	16.9857	17.2504	18.7839
RALA	Q3ZCK2	4	16.6405	16.733	16.4786	16.6877	16.5816	16.627	17.4732
RPS14	A0A3Q1MCJ7;A0A3Q1LNR2;F1MR01	5	20.095	20.3137	20.3884	20.3501	20.1473	20.1673	20.3994
NPM1	E1BCL3;A0AAA9RVD2;Q3T160;A0A3Q1LR94	8	21.3394	21.4284	21.5162	21.4585	21.4365	21.4664	21.4435
PACSIN3	A0AAA9TSI6	7	15.3396	15.0993	15.0061	15.4743	15.3567	15.2488	15.8648
COG7	A2VDR8;A0A452DKB6	21	16.1945	15.9997	16.1699	16.1399	16.1661	15.9934	16.205
DOK1	Q5EA84;F1MRT5	7	15.0855	15.1008	14.8652	14.9922	15.0326	14.8477	14.7088
ZFYVE9	F1MKY4	3	NA	12.9932	13.017	13.3951	13.4661	13.5088	13.7672
BCL9L	A0AAA9T3R5	5	15.1255	14.9196	15.2515	15.0948	15.5639	15.2172	15.3632
TKDP4	F1MNL9	6	20.5346	20.654	20.8268	20.0943	20.6828	20.5008	19.8029
NUP153	A0AAA9TXI1	29	18.6011	18.7293	19.0176	18.9796	19.0621	19.0365	19.0761
MYOF	F1N3I4	82	18.4628	18.4669	18.2986	18.0503	18.329	18.4337	18.9059
DHX32	A7MBI4	20	16.2438	16.5104	16.453	16.0921	16.3001	16.2612	16.0194
CEP170B	G3X6H0	35	16.5212	16.6953	16.8781	16.333	16.3607	16.4853	15.5762
PRKAR1A	P00514	6	15.7493	15.4029	15.5981	15.8611	15.5291	15.4975	15.5668
SUN1	A0AAA9U142	14	15.1433	15.4823	15.6724	14.4589	14.7999	15.0381	15.4374
CD55	A0AAA9T3R1	5	15.9229	16.0735	15.3971	13.87	14.9195	15.1999	15.5627
UPF1	E1BEK9	50	18.5659	18.4448	18.6499	18.5744	18.53	18.5321	18.4745
HSDL2	A4FUZ6	18	17.5623	17.563	17.6327	17.3439	17.5412	17.663	17.4436
GORASP2	F1MSB5	8	16.9319	16.9466	17.2337	17.3789	17.3181	17.3368	17.8393
THEX1	G3MZQ7;Q32LA2	7	15.5958	15.5111	15.2906	16.161	15.8864	15.534	15.7837
USP15	Q2HJE4	33	17.2153	17.0124	17.1207	17.2122	17.1342	16.984	17.1102
SIRT7	Q0P595	4	14.4976	14.3862	14.5003	14.0055	14.1059	13.9589	13.8889
RIN3	A0AAA9TVZ2	12	14.7386	14.775	14.719	15.2314	15.1116	14.9099	14.8934
HOOK1	E1BAT1	28	16.3703	16.1689	15.9251	16.5198	16.5074	16.1704	15.9881
PSMC4	Q3T030	24	18.6529	18.392	18.5044	18.8295	18.5186	18.4001	18.4002
NCBP3	E1BM89	6	15.2267	15.5591	15.5991	15.5581	15.5315	15.4781	15.7275
SEPTIN9	A0A3Q1MB56	21	19.5233	19.4507	19.5132	18.9472	19.1546	19.3742	20.1514
SEPTIN7	Q6Q137	21	18.8218	18.6981	18.748	18.5959	18.6207	18.5961	19.0702
ANXA8	Q95L54	22	21.6243	21.7409	21.7146	20.9439	21.4231	21.2393	22.0059
NUP98	E1BCV4	48	19.2152	19.3184	19.4517	19.2953	19.3622	19.3712	19.4318
NUFIP2	A0AAA9TDA2	17	17.0934	16.8777	17.1352	17.8113	17.6671	17.5554	17.5685
COG3	E1BGA6	22	15.9439	16.1293	16.2143	15.7611	15.7973	15.91	16.0013
EHMT1	A0A3Q1LPD0	11	15.2871	15.3007	15.4705	15.3359	15.073	15.0274	15.5272
SLC43A1	A0A3Q1MUY6	2	14.9858	14.9629	15.1631	14.6766	14.9862	15.1514	15.7231
CHPF	E1BMM8	8	15.06	15.0148	14.7664	15.0539	14.6485	14.9947	15.3878
PSMD9	Q3SZ19	8	19.1921	18.9036	18.9043	19.4629	19.3703	19.0694	18.9084
PTCD3	Q2KI62	18	17.5833	17.5933	17.5616	17.5032	17.7472	17.7529	17.3732
MRM2	A0AAA9SIB5	2	13.272	12.9144	NA	13.3958	13.1824	13.8294	13.8694
SSRP1	A0A3Q1MNI4	20	19.758	19.774	19.7276	19.748	19.7387	19.7786	19.7846
NCSTN	A0A3Q1MDC6	6	17.9642	18.0475	17.8556	17.8242	17.7985	17.7074	18.0857
BZW2	A0AAA9RSW0	14	18.3694	18.3331	18.3521	18.0868	18.0576	18.0368	18.2808
AMACR	F1MCN8	2	16.4004	16.2019	16.1171	16.7396	16.7835	16.7232	15.3911
TRIM28	E1BJG5	19	18.7671	18.8103	18.9122	19.0696	19.0216	18.994	19.5253
PITPNM1	E1B9I9	16	16.6838	16.7558	16.8325	15.9363	15.9676	16.3927	16.0418
HSPA14	Q2YDD0;G3MY73	14	16.4521	16.5261	16.3715	16.5811	16.353	16.2548	16.4802
FEM1B	F1N162	3	15.9987	16.2969	16.2388	16.7845	16.5236	16.5895	16.7479
DHDDS	F6RWD2	9	16.4372	16.7504	16.6314	16.6187	16.3757	16.4361	16.4531
PARL	Q2KHV4;A0A452DJF2	4	15.511	15.6004	15.2755	15.5035	15.4405	15.0478	15.1257
ASNS	Q1LZA3	23	18.8485	18.8274	18.5524	18.4783	18.3903	18.4359	19.1106
TFAM	Q0II87;E1BA21	9	17.9274	18.0526	18.1439	18.024	18.1763	18.2962	17.9329
ATP6V1A	A0A452DJG1;P31404	31	19.5244	19.4929	19.7912	19.1529	19.3208	19.2993	19.2125
RCN2	Q0VCQ9	13	17.0855	16.9748	17.1481	17.283	17.2752	17.4019	17.9654
LIMD1	G5E5X0	9	15.5382	15.6079	15.7895	16.0728	16.0967	15.9869	15.4188
ENPP4	A2VDP5	6	16.6636	16.2463	16.7059	16.9995	16.5278	16.3949	15.8266
ESRP2	A0AAA9S204	12	19.6383	19.8408	19.8347	19.3412	19.6557	19.5422	19.0656
LOC515333	F1MUC1;A0AAA9TUR1;A0A3Q1M6C0;A0AAA9TZ11	9	14.6143	14.622	14.4102	14.8498	14.4328	15.1309	16.399
SMARCE1	F6RNR1	10	16.7929	16.6393	16.8678	16.6182	16.5272	16.6741	16.4928
TIMM8A	Q3ZBS8	4	19.2176	19.3921	19.4722	19.3534	19.3032	19.3393	18.7916
RBM26	A0A3Q1MNU7	10	15.6487	15.5331	15.7141	15.6078	15.666	15.8413	15.9168
KRT7	Q29S21;A0A3Q1MKC8	30	24.3514	24.6593	24.6803	23.6478	23.8016	24.1535	23.5001
PAPSS2	A0AAA9SX99	7	15.9557	15.8155	15.9924	15.1317	15.1248	15.704	15.4448
CCDC8	A0AAA9SDF5	5	14.9249	14.6581	14.1018	15.143	15.4374	15.4145	16.5569
CNTRL	A0AAA9U0N7	3	13.8196	13.7459	13.9364	13.9773	14.044	13.9824	13.5788
BLOC1S4	Q0VCC3	5	17.6766	17.4108	17.6913	17.4238	17.5235	17.5292	17.8233
PKN1	A0AAF7AT19;A1A4I4	8	15.5216	16.0457	15.7015	15.3941	15.4503	15.4624	15.977
ZZEF1	A0AAA9TUR4	39	16.6682	16.3828	16.4545	16.5516	16.4602	16.3581	16.3505
ASL	A0AAA9T703;Q3SZJ0	23	18.6128	18.3304	18.5277	19.0728	19.1168	18.7184	19.0368
COMMD10	A4FUB5	7	17.6131	17.6041	17.4226	17.7948	17.6425	17.5638	17.544
RPS10	Q3T0F4	9	21.6053	21.7509	21.7569	21.7334	21.6054	21.7998	21.8506
WBP2	E1BGX4	7	17.885	18.0363	17.8601	17.9081	17.5556	17.6414	17.489
SCYL1	A6QLH6;F1MVK2	16	16.7256	16.6792	16.7313	16.7268	16.6647	16.6002	16.7921
ALKBH1	F6RQT4	4	14.7988	14.7432	14.6505	15.1385	14.6174	14.8256	14.8988
EFNB1	A1L570	7	16.6511	16.9507	17.2092	15.7594	15.9546	16.3647	16.7089
DNAJB2	A0AAA9TVG8	4	15.3768	15.3434	15.2913	15.356	15.1419	15.0212	15.033
FLNA	F1N169	103	19.8578	19.8471	19.9662	19.7224	19.9608	19.996	20.7503
TBC1D15	A0A3Q1MTW0	20	17.7755	17.7999	17.7459	18.1691	17.9949	17.7936	18.1585
CAPN7	E1BIX3	17	15.8051	15.8905	15.6677	15.9277	15.9215	15.6549	15.7875
SPATS2	F1MK70	11	16.6081	15.9257	16.1846	17.6081	17.3004	16.8948	18.1292
MCAT	E1BPG0	15	16.9522	17.0162	16.9826	16.3152	16.6242	16.7261	16.5345
DPEP1	A0AAF7A8I1;Q3SZM7	10	14.6566	15.3878	14.854	14.7026	13.62	15.0859	17.5553
SIPA1	A0AAA9TDI5	8	15.4012	15.0371	15.1172	15.5305	15.5098	15.1166	15.0124
COMMD9	Q2TBN5;F1MIC5	8	16.6792	16.6741	16.6674	17.139	16.9591	16.6663	16.6076
KIF13B	A0A3Q1NM85	45	17.7036	17.7614	17.7282	17.5714	17.63	17.5702	17.4467
MCM6	E1BH89;Q2KIZ8	34	18.816	18.6144	18.6682	18.8102	18.7077	18.4874	18.8127
FASN	F1N647;Q71SP7	86	20.7033	20.6211	20.3942	20.6632	20.6283	20.6932	21.4218
KIF2C	A0AAF6DLX8	18	17.0325	17.0476	16.7488	17.8595	17.5243	17.2704	17.1858
HNRNPUL1	F6Q807	16	19.8261	20.0129	20.0888	19.2301	19.504	19.8422	19.9049
DNAJC7	F1N7H0	23	17.4423	17.2997	17.3214	17.7415	17.5186	17.3225	17.2003
PTPA	Q2KJ44;A0AAA9SFG3	8	18.574	18.5656	18.7057	18.556	18.5552	18.3663	18.5567
LCP1	F1MYX5	6	15.8158	16.1936	15.6034	15.9163	16.0108	14.8912	15.6301
TTPA	F1N086	4	14.0929	14.2845	14.4177	13.1289	13.3214	13.6242	13.2588
ACOT2	A0A3Q1MH73;A6QQA9	4	14.4211	14.2677	14.6505	14.6643	15.0332	14.5695	15.0465
KLHL25	F1N592	17	16.2412	16.222	16.1205	16.1014	16.3338	16.0418	15.437
EP300	E1B8D6	11	15.769	15.76	15.9586	15.6117	15.6608	15.671	15.7301
LOC515570	F1MF76	36	19.6048	19.6064	19.4614	19.2327	19.4288	19.6767	19.4022
NOTCH2	F1MPE9	20	15.8105	15.6011	15.8115	15.4619	15.7898	15.9129	15.6784
SIGIRR	A0A3Q1LRV5	12	16.1476	16.0152	16.3419	16.1261	15.882	16.4039	15.7288
MARCKS	P12624	4	17.5971	17.7475	17.5288	17.9404	17.9714	18.2043	19.0002
TBCA	P48427;A0A3Q1M6V1	10	18.824	18.6072	18.5691	18.7832	18.793	18.5795	18.7131
ADNP	E1BCZ9	21	15.4559	15.3408	15.6191	15.3366	15.3855	15.6752	15.7732
ANXA2	P04272	28	22.5622	22.8042	22.5954	21.5409	22.3621	22.381	23.1849
GPRC5C	Q2YDG0;A0A3Q1MJL6	4	15.1916	15.1419	14.4084	16.156	15.1428	15.4282	15.8745
RPS2	A0A3Q1MAT9;O18789;A0A3Q1LT23;A0A3Q1MBL4;A0AAA9S423	12	21.4815	21.7073	21.5413	21.7207	21.5502	21.3773	21.5854
ATAD2B	F1MEY1	16	18.2005	18.3392	18.5577	18.0153	18.0396	18.414	17.9527
ADO	G3MZK0	7	15.4687	15.3151	15.607	15.3986	15.6497	15.7264	15.6864
DSCC1	A0AAA9S5L7	7	17.3186	17.5773	17.4145	17.4662	17.4234	17.3246	18.5863
PCNA	Q3ZBW4	8	18.7949	18.5235	18.6505	19.3041	19.1281	18.8304	18.8958
DYNC1LI1	Q2KII9	16	17.1638	17.1389	17.2784	17.203	17.3135	17.332	17.6703
CHURC1	Q2HJG7;A0AAA9S2T1	4	16.6028	16.395	16.3422	16.2972	16.3613	15.8348	16.0016
KIF23	A0AAA9SA93	23	15.6925	15.5373	15.5248	15.8376	15.9472	15.8174	15.8307
OSBPL5	A0AAA9SI60	6	13.6619	NA	13.9204	13.6295	13.6497	13.8096	14.2136
NPC1	A0A3Q1NDF8	13	17.4967	17.3566	17.2086	19.0629	17.8565	17.7908	17.6931
EPB41L3	E1B7S3	24	17.6807	17.6628	17.7663	17.2413	17.4437	17.7561	17.3311
MED24	A0A3Q1MN23	10	16.2071	16.2082	16.2038	15.7912	15.8208	15.9273	16.0337
CANX	A7Z066	27	21.1014	21.2979	21.2536	20.8807	21.0087	21.3222	21.243
RALB	A5D977	5	17.1295	17.2897	17.148	16.4366	16.8146	17.0984	18.0437
P4HA1	Q1RMU3	25	17.5724	17.916	17.4533	16.8162	17.0131	17.529	19.5222
DBNL	A0A452DIT4;A6H7G2	19	19.7182	19.4806	19.8542	19.6852	19.9079	19.7197	19.1831
RAB25	Q58DW6	9	18.9786	19.4161	19.3955	18.4165	18.6135	18.852	18.2471
ARHGAP29	A7YY57	22	15.9798	15.8098	16.0738	15.9489	16.0429	15.9785	16.9189
IGF2BP3	A0AAA9S0Y0	22	19.8787	20.2341	20.2436	19.9625	19.9872	20.028	20.1937
EPHX2	F6QS88	18	19.1836	19.1676	19.2285	18.0528	18.5234	18.7121	18.1164
NUDCD1	E1BLF7	18	17.1618	17.2613	17.3823	17.398	17.1691	17.1497	17.5209
RHOT1	Q2HJF8	6	15.7677	15.7892	15.7317	15.3835	15.5438	15.9031	15.5987
UBTF	A0AAA9TQ73	21	17.7285	17.8288	17.8877	17.5861	17.5571	17.7418	17.6284
PPM1F	E1BF95	15	16.7431	16.3471	16.6432	16.5168	16.6258	16.5445	16.4069
SMC2	F1MY41	46	19.3637	19.2174	19.2044	19.6408	19.5	19.3584	19.3326
ACAA1	Q3ZC41	16	19.4567	19.8466	19.7817	18.8447	19.1053	19.2359	19.0585
TBCC	Q3SZE9	11	16.7631	16.3653	16.45	16.7329	16.6632	16.3807	16.4124
RABEP2	A4FUG8	14	15.6898	15.7883	15.8387	15.4677	15.521	15.3177	15.8398
DNM1L	Q2KIA5	28	18.1073	17.8826	17.9988	18.239	18.2233	17.9583	17.782
PPFIBP2	A0AAA9TIW8	25	16.4359	16.577	16.6691	16.5959	16.6778	16.598	16.1833
FERMT1	A0A3Q1M848	15	16.7962	16.3989	16.5763	16.3365	16.3563	16.6389	15.9117
MED9	Q2KHX9	4	15.5702	15.5481	15.489	15.6548	15.2609	15.4952	15.498
COG4	A0AAF6YYF2;Q3MHG0	19	16.798	16.6062	16.8037	16.6231	16.6391	16.5384	16.4692
C1QBP	Q3T0B6	4	19.7208	19.833	19.7434	19.7224	20.0425	19.4873	19.9635
TPM4	A6QR15;A0AAA9TGF5	7	20.5142	20.3591	20.5222	19.9602	20.0372	19.7472	19.552
CKAP4	F1ME65	36	19.7365	19.7789	19.5573	19.4592	19.6243	19.9026	20.6409
OGFOD1	Q3MI03	11	15.5148	15.1694	15.3413	15.5881	15.3092	15.0627	15.254
TOP1	A0AAA9TV68	24	18.7388	19.0592	19.0215	18.4637	18.5532	19.0643	18.8889
KLC2	A0AAA9S260	11	15.6148	15.3708	15.3919	15.8195	15.7727	15.605	16.1754
HDGFL2	F1MT65	7	17.1039	16.8472	16.9754	16.9339	16.7993	16.8897	17.2583
MICOS13	A0AAA9TCD6	4	15.9067	15.6686	16.1781	15.9044	16.0545	16.0092	15.7133
CC2D1B	F1N7R5	17	16.2412	16.2978	16.1104	16.4834	16.3025	16.0512	16.1389
ARHGDIA	P19803;A0A452DJ82	9	21.8288	21.6769	21.7038	21.8159	21.7906	21.7344	21.9262
THRAP3	A0A3Q1NI32	25	18.4203	18.4568	18.6972	18.3649	18.6276	18.7086	18.7528
BMS1	E1BPP2	22	16.2506	16.3516	16.3404	16.6341	16.5429	16.6076	16.6798
ENOPH1	Q0VD27;A0AAA9TBH1	6	16.4989	16.5532	16.5242	16.655	16.4729	16.4289	16.9475
EXOSC8	Q2KHU3	8	16.9141	16.7932	16.9255	16.993	16.9769	16.8785	16.7538
PHF6	A0AAF6Z126;Q08DR0	4	14.6815	14.725	15.0653	14.3739	14.623	14.9748	15.5269
TAF6	Q58DG7	11	14.8931	14.8192	14.9282	14.6476	14.8946	14.8469	14.9418
VPS13B	A0A3Q1MEI1	26	15.2964	15.5476	15.8436	15.1139	15.1278	15.3446	15.2421
ACSL6	A0A3Q1NEA4	37	20.3581	20.5137	20.4912	20.2969	20.3317	20.3989	19.4966
S100A11	A0AAA9TWM3	4	20.548	21.1838	20.8332	18.4864	20.1664	20.0446	21.6146
PLS1	A6H742	25	19.4388	18.9391	18.9227	19.7825	20.1547	19.1937	17.9104
ARHGEF5	F1N2G5	13	15.2755	15.6217	15.5066	14.6836	14.9928	15.1605	15.3056
MSX2	Q0P5C3	4	16.3657	16.5915	17.008	16.6323	16.8007	16.8538	16.4272
FIP1L1	E1BKM0	7	16.8143	17.0729	17.3612	17.0127	17.0188	17.1473	17.356
SMARCD1	Q2TBN1;F1MTG9	10	15.3782	15.3066	15.3321	15.224	15.3119	15.4229	15.697
BASP1	P80724	15	21.2109	20.7511	20.5936	21.891	21.6358	20.7627	20.5466
TYMS	Q2TA32;A0AAA9TIK9	7	16.1203	16.1884	15.77	16.6177	16.1512	16.2184	17.7299
PRR14	A0A452DJ07;Q0VBZ8	2	14.0683	14.5371	14.6737	14.2388	14.1928	14.2355	14.2683
TUT1	Q1JPD6;A0A3Q1MNQ1	5	21.2438	21.0791	21.1789	21.6035	21.3414	21.1595	21.2614
RRP1	Q148H9	9	16.6042	16.593	16.9006	16.883	16.8561	17.034	16.8403
AASS	A0AAF6ZWM0;A8E657	22	17.5989	17.7835	17.9138	17.6428	17.9629	17.9505	16.958
ELP6	A0AAA9SGT2	4	14.8738	14.9735	15.0678	14.9531	15.0966	14.8719	15.1001
LRPAP1	A0A3Q1MD85	14	19.6907	19.7645	19.7691	19.9233	20.0225	19.7532	19.269
ABCC5	A0AAA9SQ08;F1MZD4	10	15.8775	16.0926	15.5826	17.1234	16.5476	16.5663	16.1726
TIMP2	P16368;F1N430	9	19.6159	18.0583	17.6973	18.2269	17.4055	17.171	17.3962
PXDN	A0A3Q1LMN6	55	18.2045	18.2332	18.1173	16.9343	17.4075	17.9045	20.342
IDE	A0AAA9U0H2;Q24K02	42	18.6012	18.5379	18.6107	18.5988	18.654	18.4452	18.3191
RPL13A	Q3SZ90	6	20.7873	20.6882	20.7093	20.9458	20.8592	20.6359	20.7753
PKM	A0AAA9RXQ2	32	22.9399	22.7756	22.7144	23.1543	22.9815	22.7514	23.1964
ABCF3	A0AAF6DM45	16	16.9717	16.7708	17.0899	17.3391	17.3041	17.1594	16.8765
ATAD3	A7YWC4	25	18.8348	18.8816	18.6185	18.9638	18.9728	19.1173	18.6018
CDK12	G5E518;E1BB50	12	14.4709	14.1783	14.5136	14.5407	14.6186	14.5146	14.4396
FAM120A	A0A3Q1MFI2;A6H7H1	30	17.6539	17.6757	17.7987	17.5609	17.6547	17.7731	17.8323
BCAM	Q9MZ08	18	21.6515	21.601	21.3972	20.5783	20.9544	21.2178	21.6941
AP3D1	A0AAA9ST90;Q865S1	36	18.2745	18.0518	18.2992	18.162	18.1425	18.0673	18.0742
RPS19BP1	A6H7J2	2	13.2171	13.5552	NA	NA	14.3222	14.3834	14.5319
GIT1	A0A3Q1M7Q3	16	17.2071	17.2713	17.3384	16.8197	17.0032	17.2406	17.1889
GCC2	E1BB16	49	19.1212	19.1686	19.2985	19.1446	19.0921	19.0775	18.9908
LMNB1	A7YY47	31	18.4376	18.5558	18.6866	18.3283	18.4651	18.5502	18.6664
TARS1	Q3ZBV8	33	18.8208	18.6676	18.6107	19.1284	18.9533	18.7276	19.0719
TOPBP1	A0A3Q1LWE4	16	14.827	14.8351	15.0676	15.3513	15.196	15.1625	15.0638
PRRC2C	G3X6B2	36	17.8701	17.7625	17.9894	18.3521	18.1822	18.0854	18.0471
MORC3	F1MFY1	22	15.7116	15.5541	15.6773	15.8569	15.7998	15.8306	15.2063
RALBP1	F1MPV3	7	18.9027	18.685	19.0783	18.3097	18.7113	18.7582	18.2008
FLNC	A0A3Q1LV98	105	20.2357	20.083	20.3201	20.038	20.5162	20.2049	19.4535
KIF1C	A0A3Q1N141	21	19.8009	19.6238	19.7323	19.7904	19.7889	19.8301	19.6369
E2F4	F1MBE6	5	15.3881	15.4859	15.4154	15.7105	15.3968	15.5501	15.392
TM9SF2	F1N672	13	19.5664	19.432	19.5981	19.2806	19.3828	19.6665	19.4197
KLHL3	A0AAA9T372	10	18.9797	18.779	19.0932	18.6005	18.7773	18.9977	19.2196
ALDH18A1	Q2KJH7	27	17.861	17.6531	17.6445	17.7598	17.5883	17.82	18.5503
VPS25	A0AAF6Z7J4;Q5E9A6	10	17.5552	17.6435	17.5475	17.9091	17.681	17.5816	17.6254
DBT	P11181	11	16.4077	16.6766	16.7103	16.1243	16.1165	16.7025	16.318
MCM4	E1BFZ9	36	18.9001	18.7035	18.7857	18.8728	18.7407	18.6643	18.9178
POLR2A	G3MZY8	47	16.8501	16.7078	16.9243	16.8922	16.7245	16.6663	16.8017
KATNB1	A6QQU1	3	13.4163	13.3494	13.7231	13.7409	13.683	12.5487	14.0527
EIF1AD	A0AAF6Z7A4;Q58CY2	6	15.4402	15.9183	15.4083	15.9227	15.5794	15.6082	15.9332
GTSF1	Q3SZU0	6	15.0773	15.083	14.8006	15.4568	15.3536	15.4378	16.4129
ATIC	Q0VCK0;A0AAF6Z6Q7	34	20.2789	20.224	20.1596	20.6319	20.4203	20.1391	20.0679
MXRA5	A0AAA9S4A3	27	15.2825	15.701	15.606	14.3431	15.0421	15.0854	17.6937
DCTN1	A0A3Q1LJA4	45	18.8854	18.7388	18.9495	18.834	18.8925	18.7334	18.9645
ACAD10	E1BGS2	4	13.6818	14.2619	13.7167	13.7432	13.4602	13.9559	14.0136
TBP	A0AAF6ZDS6;Q2HJ52;F1MKV5	2	14.4402	14.7716	14.6773	14.6193	14.4754	14.6454	14.8363
ZFPM1	F1N6T0	7	14.2618	13.9673	14.4402	13.7279	13.7836	14.2158	13.7903
EZR	P31976	29	22.8869	22.6849	22.5731	22.7549	22.7323	22.539	23.0132
PDCD10	Q0VCQ6	7	17.7112	17.8366	17.8317	17.9047	17.7555	17.5688	17.9529
RBPMS	A0AAA9SL39	5	17.6377	17.5446	17.8672	17.7787	17.7483	17.7238	17.9653
TRIM29	E1BEZ4	20	17.9776	18.7791	19.0041	NA	NA	15.7308	16.9906
INTS10	A5PJT2	14	15.0389	15.1705	15.2264	14.9971	14.9631	15.0772	15.1349
SFPQ	E1BQ37	24	19.8792	20.0915	20.3034	19.8212	19.9378	20.1689	20.2215
AKAP9	A0A3Q1MK49	57	16.029	15.9407	16.0932	15.8163	15.9484	16.0391	16.2536
PSPC1	Q1LZD9;A0AAF6YLV5	13	18.4657	18.9415	18.83	18.1833	18.3776	18.5404	18.6617
PRP4K	Q08DZ2;A0A3Q1MNY8	20	16.8288	16.7626	17.104	16.6347	16.7573	16.8505	16.5892
CCDC6	F1N091	18	16.6548	16.6879	16.8547	16.6271	16.6755	16.5498	16.9903
PRKDC	E1BLB6	38	15.4292	15.4889	15.5184	15.1772	15.1856	15.1677	15.5257
XPO6	F1MI29	13	15.6	15.4553	15.2316	15.9367	15.8162	15.3842	15.4194
SPTBN1	A0A3Q1MXU7	99	18.1357	18.0254	18.1101	17.4834	17.7983	18.0401	18.8835
NLN	G3X795;A2VDQ5	6	13.8754	14.0009	13.9383	14.1602	14.1325	14.0895	15.2405
SMC3	O97594;A7Z065	53	17.7836	17.794	17.925	17.5092	17.732	17.6941	17.8988
HAUS1	Q2TBK4	3	14.8911	14.6916	15.0496	14.7663	14.9058	14.5436	14.6621
UTP11	F1N165	10	15.4845	15.6103	15.6392	15.5278	15.6421	15.8359	15.5993
PRRC2A	E1BAF6	36	16.12	16.3418	16.5222	16.3815	16.5236	16.5615	16.7517
DNAJC13	F1MDR7	71	16.9607	17.1239	17.1054	17.1564	17.2192	16.8728	17.1108
NELFB	G5E5S2	23	16.5215	16.4945	16.7436	16.5493	16.5933	16.597	16.7629
BNIP1	F1N353	7	15.9223	15.9468	16.1205	16.0008	16.2542	16.1803	16.3404
SMG6	E1BFK4	7	15.4133	15.252	15.3462	15.6427	15.627	15.6574	15.3923
TRIM27	Q1LZA9	8	15.0224	14.8012	15.036	15.1405	15.3801	15.2759	15.1126
SSB	P10881	24	19.232	19.1769	19.0247	19.7445	19.4605	19.3079	19.3276
PPP4R1	A0AAA9T691	25	17.6687	17.5557	17.6076	17.5634	17.4778	17.33	17.047
RPS3	Q3T169;A0AAA9TQX8	15	22.0181	22.1351	22.031	22.2314	22.1004	21.9277	21.9807
STRN	A0A3Q1MGW7	19	16.7264	16.964	17.1813	16.7485	16.7547	16.7646	16.8391
PLOD1	G8JKV7;O77588	23	15.795	15.8176	15.3908	14.9606	14.9626	15.4323	17.7304
SMPD2	F1N588	9	16.6356	16.5998	16.8383	16.6382	16.6416	16.7179	16.3511
ZFHX3	E1BPV9	8	14.1178	14.2534	14.4619	13.676	13.3987	13.9114	13.5714
RUFY1	A0AAA9S3N9	9	15.4657	15.2104	15.3214	15.4727	15.0799	15.2564	15.3962
PSMD11	Q2KI42;A0A3Q1MDI3	23	19.201	19.016	19.0593	19.3588	19.2523	19.0648	18.9681
SHCBP1	E1B738	15	16.0879	16.0384	15.7692	16.6131	16.4708	16.218	16.1848
EXOC2	E1BDW9	21	16.0919	16.0403	16.1206	15.9843	16.0229	15.923	16.3275
MON2	A0AAA9T6Y7	32	17.8738	18.016	17.9503	17.5855	17.6482	17.6179	18.0386
DCAF1	A0A3Q1LW88	27	15.3831	15.5241	15.4554	15.782	15.676	15.5795	15.6647
NASP	A0A3Q1M1D3;Q2T9P4	30	20.4619	20.3897	20.5387	20.6803	20.6388	20.4179	20.6364
TPD52L1	Q0VBY4	6	18.9523	19.1224	19.3058	18.7936	19.3158	18.8599	18.4175
SIN3A	F1MTR3	23	16.1907	16.2511	16.5052	15.8689	16.2209	16.2745	16.3342
ACSS2	A0A3Q1MB37	16	18.3066	17.993	17.9321	17.2462	17.6218	17.9956	17.3792
ALDH6A1	Q07536;F1N7K8	19	17.0261	17.0276	17.2503	16.4032	16.6498	16.9895	16.9995
DIAPH1	A0A3Q1LUD9	35	17.5989	17.5588	17.496	17.6068	17.6119	17.3261	17.4695
CEBPZ	F1MHM7	29	17.1857	17.3668	17.335	17.4908	17.4224	17.4531	17.5118
LSG1	A0A3Q1MV30;Q2YDM7	14	16.8046	16.3809	16.7839	17.1768	16.7404	16.8968	16.8464
TSEN2	A0A3S5ZPE3	3	15.0417	15.0472	15.3738	15.1345	14.613	15.1969	14.9158
CWF19L2	F1MR62	19	18.5795	18.6933	18.7133	18.7966	18.821	18.7028	18.7615
CCZ1	Q0VD30	14	15.2965	15.1214	15.1092	15.4997	15.2624	15.1322	15.2012
SCPEP1	Q2NKZ9	9	17.5186	18.0787	17.707	16.5782	17.3173	17.3787	17.129
ATP13A1	F1MYA8	33	16.7451	16.8282	16.7273	16.3857	16.494	16.8726	16.7576
ARID2	F1N463	8	15.0822	15.2711	15.4798	15.3319	15.4038	15.3489	15.307
GATM	Q2HJ74	20	17.5929	17.2751	17.649	16.3409	16.5709	17.6182	19.7089
KBTBD8	A0AAA9TU80	9	16.0344	15.5646	15.6392	15.7252	15.9261	15.7132	15.8136
BCAP31	Q5E9F1	11	20.1134	20.3425	20.3682	19.7557	19.966	20.4692	20.1928
ARPC4	Q148J6	6	21.0007	21.3072	21.1259	20.7721	20.7905	20.7001	20.8538
IGF1R	G1K218;Q05688	11	15.7357	16.0322	16.0897	14.8724	15.196	15.748	15.6772
KLHL11	A0A3Q1M7U1	5	17.9895	18.1906	18.3951	17.9498	17.8898	17.7738	18.1517
TM9SF4	A5D7E2	12	17.7894	17.5936	17.6395	17.5318	17.6305	17.8448	17.682
HEXIM1	Q0X0C4	6	17.079	16.9626	17.4171	16.5548	16.826	16.6426	16.8121
LPCAT4	A0AAA9SAW2	12	15.7923	16.3333	16.4427	15.4024	15.9227	15.8555	15.9866
TRAM1	Q9GKZ4	5	18.2908	18.203	18.1981	17.8572	18.1263	18.6302	18.2218
LRPPRC	A0AAA9SR44	67	18.7765	18.7212	18.6203	19.1512	19.0737	19.0538	18.6501
THADA	F1MV18	33	16.9467	16.7503	16.7322	17.4675	17.1709	16.9384	17.2869
NSF	A0A3Q1MR04	32	18.1418	18.2454	18.5543	17.7243	17.8638	18.0007	17.9282
MICAL2	F1MF74;A0A3Q1MTT2	9	16.0559	16.3936	16.6035	15.2176	15.0862	15.3837	15.8483
OTUD4	E1BN58	4	13.8907	13.8552	14.636	13.9416	14.0937	14.2008	14.6638
SLC35B2	Q3ZBB0	9	16.7265	17.0878	17.1603	16.6565	16.7333	16.9983	16.7799
ADI1	A0AAA9S8H4;Q3ZBL1	11	18.4037	18.0922	18.0276	18.0424	17.9727	17.6874	18.0446
GATAD2A	A0A3S5ZPD8	17	16.8922	16.7865	16.8713	17.2093	17.1378	16.9342	17.3083
RTN4	F1N405	14	19.3179	19.5306	19.7565	19.3562	19.327	19.6198	19.5974
MTMR6	E1BJH8	22	16.2111	16.1198	16.1478	16.4429	16.3146	16.2296	16.2372
IARS1	A7MBC5	48	18.0771	17.9487	17.8442	18.3391	18.0958	17.989	18.1501
DIABLO	A0AAA9T9X9	3	17.796	18.2598	18.2815	17.4834	17.5341	17.6369	17.7935
FOLR1	P02702;A0A3Q1MRP4	8	16.9295	16.1153	14.7401	16.7989	15.675	14.823	16.1077
EIF3B	A7MB16	33	19.433	19.3265	19.3062	19.6201	19.4208	19.2941	19.3527
LPGAT1	A0A3Q1LJ78	6	14.5231	15.3945	15.2121	14.1485	14.1351	14.6066	14.8367
CHORDC1	Q29RL2	12	18.2124	17.9028	18.0322	18.8945	18.741	18.3909	17.9324
ILF3	F1MMA0	27	18.9169	19.0303	19.071	18.9558	18.8559	19.0404	19.0646
BUB1B	F1MWP1	17	15.3566	15.3625	15.2986	15.9669	15.8629	15.6934	15.3162
OGFR	F6RA54	8	15.9286	15.6667	15.8517	16.0396	15.9742	15.6603	15.822
CPSF1	Q10569;A0A3Q1MKB1	29	17.7395	17.9322	18.0497	17.6353	17.7361	17.8085	17.7405
PLSCR3	A0AAA9RZG2	3	14.5836	14.8772	14.0625	13.9474	14.0754	14.2886	14.9885
USP47	A0A3Q1NK97	33	17.2013	17.2174	17.2106	17.4232	17.5156	17.1684	17.3004
LRRFIP2	E1BBW0;Q2T9W6	9	16.1537	16.3666	16.6735	16.0369	16.261	16.0954	16.342
IGF2BP1	E1BKJ7	22	20.4516	20.5461	20.5091	20.5266	20.5144	20.6773	21.3038
PARD3	A0A3Q1MT26	20	16.8422	16.7903	17.0396	16.7854	16.791	16.9838	16.8212
SNX29	Q08DX0;A0A3Q1N0T4	4	NA	14.8749	14.3814	14.6979	14.3713	14.5286	14.9475
OGDH	Q148N0;A0AAF6YPM1	38	18.8537	18.89	18.9323	18.7565	18.91	19.0237	18.75
PRAG1	A0A3Q1MBQ1	8	14.8797	14.778	14.9639	14.9386	14.8325	14.7968	14.7222
STOML2	Q32LL2;A5PJA6	15	18.4034	18.8566	18.4127	18.5469	18.5123	18.6001	18.342
TJP3	A0A3Q1MSB9	16	16.7541	17.0454	17.2565	16.5649	16.7117	16.9796	16.095
LUC7L	F1MMH3	6	17.7285	17.9393	17.9725	18.165	18.092	18.1426	18.3774
TJP2	A0A3Q1MPV5	48	19.279	19.4167	19.5047	18.742	19.1386	19.0513	18.4791
PRPF40A	A0A3Q1MF35	17	17.571	18.0187	18.1691	17.476	17.4108	17.7392	17.7453
FANCA	A0AAA9TBU1	3	14.3107	14.9567	14.8784	14.2979	14.2861	14.4394	14.7357
SP2	A0AAA9S4T0;Q5E9U0	2	13.3018	12.6334	13.548	13.9302	13.7339	13.8583	14.3088
RMDN1	Q32KL4;A0AAA9T0I3;F1MFW0	9	17.2495	17.3376	17.581	16.8384	16.8112	17.0944	17.0279
CCDC174	A0AAA9T157	2	13.1818	13.8416	12.6583	13.296	13.5615	13.3284	13.5682
DPY19L1	F1N3H6	6	14.1038	14.564	14.7442	13.3604	13.0946	14.1549	15.7747
USP10	A5PJS6;A0AAF6YU44	15	17.92	17.6971	17.9002	18.0061	17.913	17.9633	17.6067
SLC9A6	A7MB44;A0A3Q1M7D5	3	13.676	13.9597	13.5415	13.8406	13.7106	13.6957	14.5352
LRBA	A0A3Q1MGD3	55	19.9246	19.8805	19.9874	19.4922	19.7125	19.556	19.0631
KDM5C	F1MYV2	14	14.9008	15.105	15.1483	15.0498	15.13	15.0964	15.2634
PUS10	F1MRD5	17	16.2735	15.6728	16.0119	16.5261	16.3429	15.9713	15.2834
LOC112445002	A0AAA9SRZ1;A0A3Q1ML81	5	16.0377	16.0507	16.3741	16.2391	15.8862	15.9246	16.5127
WDR55	Q58DT8	8	15.1719	15.0856	15.3776	15.6142	15.3845	15.436	15.2837
MTAP	Q3MHF7;A0A3Q1LUB3	19	19.3128	19.0863	19.0557	19.5916	20.289	20.0487	19.7389
PIGN	E1BM45	6	14.3326	14.3223	14.2424	14.2366	14.1601	14.4021	14.5333
PLS3	A7E3Q8	5	14.4164	13.8132	13.5995	14.7537	14.6736	14.1369	14.6879
TFCP2L1	A0A3Q1LGL9	10	15.9688	15.982	16.2126	15.7401	15.6152	15.9898	16.5299
SYNJ1	A0A3Q1MIH5;O18964	22	15.9226	15.7944	15.8255	15.6642	15.6392	15.5962	15.1827
TPR	A0AAA9T4R9	86	18.2878	18.4554	18.5537	18.1568	18.2408	18.3252	18.2882
HMMR	F1N331	17	16.5585	16.1883	16.3081	16.973	16.802	16.553	16.4581
PDE5A	Q28156	13	14.6911	14.3895	14.2808	15.2257	15.1179	14.8333	15.9011
GPS1	A0AAA9S1F3	17	17.6734	17.3606	17.4207	17.8842	17.6845	17.4629	17.5389
DPP3	A0AAA9T7D8	28	19.1138	19.0482	18.8966	18.8905	18.8966	18.6969	18.3634
SLC17A5	E1B7R3	3	14.8235	14.8913	14.7846	15.447	14.6921	14.8495	14.5206
SCAF4	A0A3Q1MTL1	5	14.7975	14.8081	15.0542	14.7217	14.6532	14.8756	14.9645
DMAP1	Q1LZ99	8	17.0796	17.0594	17.2754	17.0789	17.082	17.1116	17.3272
SARS2	A0AAA9SXU5;Q9N0F3	19	16.0876	16.0177	16.1025	16.1676	16.1907	16.1436	15.849
CHD1	A0A3Q1LUM8	18	15.8477	15.9288	15.9015	15.9229	15.8613	16.0709	15.9575
SEH1L	A7YY75	16	16.7787	16.7726	16.9072	16.7719	16.6438	16.8664	16.6988
UBA3	A0A3Q1M200	13	16.6637	16.8922	16.7747	16.7657	16.6659	16.4635	16.8391
TDRD3	A0A3Q1M8A8;Q2HJG4	6	14.6083	14.8507	14.9807	14.5031	14.619	14.7662	14.4092
MPRIP	A0A3Q1LSA5	23	15.9466	15.9138	16.1891	15.7261	15.8957	15.767	15.9534
PIP5K1A	A6QLC5	5	14.2489	14.2581	14.3367	14.6862	14.5588	14.4809	15.0454
OPTN	Q3ZC32	11	15.3805	15.632	15.5605	15.3248	15.4802	15.7007	15.6084
GET4	Q0P5I8	10	17.2913	17.3082	17.2065	17.3662	17.3432	17.2131	17.0041
SF3B3	A0JN52	41	19.252	19.5569	19.5082	19.1773	19.1705	19.3565	19.4853
BBOX1	F1N4U6	10	19.3986	18.8357	19.3635	16.5333	17.6506	18.1794	17.9628
APRT	A0A452DIE3;Q56JW4	8	18.1538	18.3041	18.3348	17.9212	17.9168	17.5534	18.0244
BZW1	F1MZK4	15	18.5379	18.5424	18.4174	18.9031	18.7056	18.3708	18.7588
SYMPK	E1BJF6	23	16.823	16.7811	16.9556	16.9634	16.7924	16.8266	16.7889
EIF4A1	Q3SZ54	14	21.8372	21.8235	21.8149	22.0387	21.8664	21.8408	21.8202
GARS1	A5D7A2	26	18.3808	18.3427	18.3882	18.482	18.5177	18.2576	18.4729
THOC5	A4IFQ0;F1MS93	16	16.7645	16.7282	16.929	16.6882	16.6635	16.964	17.0835
GHITM	Q3SZK3	6	18.2658	18.3481	17.9176	18.5251	18.1459	18.416	18.0393
ANKHD1	A0A3Q1M7L2	25	16.6515	16.6159	16.6406	16.9485	16.8753	16.8127	16.5755
UBR3	F1MQK6	17	17.0426	16.9838	17.1663	16.8284	16.8796	16.9559	16.8635
RABGAP1L	F6QEG6	17	15.0466	15.1118	15.1956	14.8587	15.0494	14.7799	15.1902
FAM20C	F1MXQ3	4	14.6649	15.0696	15.0527	14.0408	14.4004	14.724	14.6507
TSR2	Q3T090;A0A452DIP4	2	16.0417	15.9139	15.9581	16.388	16.3823	15.9797	15.8697
AASDHPPT	A0A3Q1LL63;G3MZI2	13	17.767	17.2791	17.5073	18.3272	17.986	17.7789	17.8041
LPIN3	E1BLQ9	5	13.9875	14.2223	13.6286	13.5518	13.9589	13.7955	13.8814
ENPP1	F1MNS5	17	17.1186	17.0476	17.1824	16.2066	15.8923	16.7648	17.3387
ZNF800	E1BPK3	5	15.1915	15.2402	15.6774	15.1482	15.2389	15.591	15.363
RAB34	A0A3Q1LX70	4	15.3003	15.5724	15.4375	15.4061	15.3777	15.6644	16.324
GMIP	A0AAA9SMC0	6	15.358	15.499	15.2126	15.382	15.6648	15.2189	15.2395
RDX	Q32LP2	21	18.1127	17.6946	17.7735	18.1325	18.0519	17.8132	17.8716
OCRL	A0AAA9U0Y4	18	15.3749	15.3452	15.4457	15.7834	15.812	15.5458	15.4865
TTI1	A0JN42	9	14.6654	14.5821	14.4512	14.8525	14.7517	14.502	14.455
ADCK5	A0AAA9SJ96	5	14.072	14.235	13.9918	13.2892	12.9358	NA	13.4268
ANKLE2	A0A3Q1LKM4	29	17.4063	17.4552	17.6697	17.6715	17.6989	17.7439	17.5486
NAA15	A0AAA9RY84	30	17.9324	17.808	17.8465	18.294	18.1552	17.8908	17.9387
LTF	P24627	33	19.2526	16.9048	15.7224	15.8044	16.8247	16.161	16.3839
MKRN2	Q2YDI8	8	16.2594	16.1375	16.3305	15.8035	16.0057	16.2655	16.112
CHCHD3	Q5E9D3	11	18.386	18.5641	18.2996	18.2523	18.466	18.3009	17.9698
PTGES	Q95L14	3	15.6804	NA	14.6806	17.537	16.6228	15.6737	NA
CDC42BPB	E1BP72	27	16.8025	16.7056	16.7324	16.7846	16.7775	16.6144	17.0889
RBM27	A0A3Q1NNK5	9	15.4962	15.4538	15.6538	15.4137	15.3452	15.4478	15.4327
ARRB1	P17870	6	13.6823	13.2443	13.8453	13.9238	14.0219	13.941	14.2563
HIBCH	Q2HJ73;F1MPK4	12	17.3014	17.5458	17.226	17.2813	17.3881	17.3845	17.1213
ABHD1	Q3T0A0	2	13.0051	13.3086	NA	13.9148	13.7851	12.6887	NA
YARS1	Q29465;F1MHM5	34	17.9382	17.7671	17.6886	18.152	17.9527	17.6332	17.7608
SNX16	A0A3Q1MTG5	7	15.7532	15.4669	15.5416	15.2367	14.6745	14.9632	14.878
ATP2C2	A0AAA9TAU7	26	18.057	18.0406	18.4075	18.5027	18.3935	18.2713	17.334
TUBGCP4	F6QIZ6	11	15.7491	15.7064	15.8496	15.6389	15.8368	15.754	15.8021
TREX1	F6QB70;Q9BG99	3	14.08	14.7453	13.4459	13.3837	13.5617	13.3533	13.7219
NRDC	A0A3Q1LY70	28	16.9565	16.515	16.5422	17.1479	16.9905	16.7939	16.8068
DOHH	Q0VC53	10	18.0626	17.5985	17.6025	18.4337	18.1602	17.7816	17.6965
SPAG9	A0A3Q1LP94	30	17.7736	17.7069	17.8561	17.6753	17.7646	17.5528	17.5579
PPP1R13L	F6RNH4	22	16.9721	17.3053	17.258	17.1013	17.2566	17.3634	18.656
MRPS23	A0A3Q1M7M3;Q2NL27	8	17.6024	17.5433	17.4692	17.6479	17.6569	17.7033	17.3503
LNPEP	A0A3Q1LSE7	26	17.3477	17.5296	17.2573	16.2441	16.7247	16.9607	17.092
NDUFB10	Q02373	8	19.0809	18.7042	18.7214	18.9246	19.0723	19.0852	18.6162
TLK2	A0AAA9TNE6	4	15.5838	15.6813	15.8342	15.6188	15.5693	15.5538	15.8463
FAM3A	A0A3Q1LQA4	5	15.0935	15.0251	15.2549	14.7576	14.949	15.0707	15.0171
APAF1	A0A3Q1LZZ2	10	16.8833	16.767	16.9228	16.4128	16.4787	16.4265	16.8203
TXNRD2	Q9N2I8	10	15.518	15.2964	15.5424	15.19	15.5203	15.673	15.124
ACLY	Q32PF2	41	19.1561	18.8848	18.8126	18.8101	18.9174	19.1947	19.8948
CELSR1	F1N6Y9	22	20.4015	20.2653	20.1569	20.0003	20.2274	20.3044	20.132
ENTPD3	A0A3Q1MDD8	5	15.1651	NA	14.0522	16.6547	16.2362	15.1435	NA
ORC1	A0AAA9SV06;Q58DC8	10	14.9286	14.5767	14.9136	15.2839	15.0319	15.2349	15.1244
OLA1	A0A3Q1LZU5;Q2HJ33	19	19.1655	18.8765	18.9644	19.357	19.2871	19.1181	19.1485
CHD7	E1BPM4	22	17.008	17.1434	17.281	16.9359	16.8613	17.152	16.9717
CDK5RAP2	A0A3Q1MVZ6	11	15.5558	15.5902	15.7992	15.5338	15.6654	15.7817	15.8579
ECE1	P42891	11	15.2647	15.5598	15.6364	14.6614	14.5118	15.1207	16.6376
PEG3	A0A3Q1LMU6;Q6H236	35	16.7064	16.4323	16.4514	17.1915	17.8503	17.0902	16.998
SLC2A3	A2VDL2;P58352	8	21.4476	21.5443	20.9854	21.7584	21.5872	21.6705	23.3623
ORC4	Q2YDI2	7	15.7301	15.6851	15.874	16.0037	15.8409	16.0061	15.9005
NT5E	Q05927;A0A3Q1MCG3	17	17.584	17.4781	17.3503	14.9361	15.746	16.8906	19.7839
LLGL2	A0AAA9SWS7	34	17.7759	17.6289	17.7408	17.4133	17.5038	17.6729	17.7856
PCCB	A0A3Q1LPE3;Q2TBR0	20	17.1997	17.3098	17.5225	16.68	17.263	17.3745	17.5672
LMO7	A0A3Q1M7E1	58	17.4537	17.7043	17.984	17.094	17.3739	17.4912	16.576
SGPL1	A5D788	15	18.6937	18.874	18.7645	19.0569	18.74	18.7727	18.4963
CRTC3	F1N1Z3	2	14.2848	13.7604	14.318	13.7362	14.2155	14.0932	14.4271
TRAFD1	Q58D05	9	15.3441	15.9496	15.7569	15.2565	15.2584	15.2881	16.4969
METTL13	A5PK19;A0AAF6Z482	26	17.0887	16.8081	16.8937	17.2852	17.4107	16.9754	16.8181
ARHGAP5	E1BM23	23	15.1844	14.9697	15.1377	14.9265	14.8431	15.0411	15.996
NPEPPS	E1BP91	38	18.835	18.754	18.8529	18.6558	18.704	18.6129	18.7999
ST14	A0AAA9SRJ3;Q0IIH7	19	19.1723	19.1895	19.0928	18.4877	18.6988	18.9746	19.0749
MET	Q769I5;Z4YHD9	32	20.8878	20.2808	20.1273	20.4308	20.9686	20.4686	20.7395
PADI2	A0AAA9SRB9	15	15.0336	15.2371	15.0517	14.2776	NA	14.6691	16.9457
PICK1	A0A3Q1MC64;Q2T9M1	3	14.1672	13.8271	14.2683	14.3996	14.039	14.2322	14.5957
OTUB1	Q3T0Y1	13	18.9677	18.6071	18.7754	18.9838	18.8975	18.6985	18.7538
DHRS9	Q8HYR6	14	19.5817	19.5406	20.4001	17.4094	17.505	19.0721	18.4673
DAB2	A0A3Q1LSX5	19	19.3275	19.1702	19.2002	19.9041	19.6033	19.1981	18.899
SRSF3	Q3SZR8;A0AAA9SK06	5	21.0795	21.6018	21.5396	21.053	21.1616	21.2001	21.3321
XYLB	A0A3Q1LRL7;Q3SYZ6	6	15.053	15.193	15.0448	15.4972	15.4482	14.9963	14.9942
TCP1	Q32L40;G5E531	27	20.0064	19.7726	19.769	20.3009	20.14	19.9586	20.1965
TRIP4	F1N1K2	8	15.2076	15.1146	15.4691	15.4934	15.4118	15.3928	15.6943
ACBD3	F1MRE5	19	17.6083	17.8359	17.8086	17.2157	17.4293	17.5204	17.5745
ATP2B4	D3K0R6;F1MQ01	18	17.6323	17.6506	17.8208	17.3414	17.4217	17.6537	18.4214
MED27	Q2TBN7	5	15.4283	15.256	15.4951	15.532	15.2896	15.5736	15.4832
ARHGEF1	E1BG38	24	17.6383	17.6271	17.6872	17.7605	17.7245	17.4977	17.7935
NAALAD2	A0AAA9TAD7	26	17.7318	17.0771	16.9696	17.9033	18.2602	17.5813	17.7092
COMT	F1MMK0;A7MBI7	14	18.1884	17.7732	17.8268	17.8736	17.9436	17.8468	17.5876
QARS1	Q3MHH4	35	18.8437	18.6045	18.7991	18.9992	18.9244	18.7416	18.9195
ATP6V0D2	Q2KJB6	5	15.2956	14.1643	13.936	14.0393	14.2247	14.5174	NA
ERMP1	F1MI95	20	17.4619	17.6775	17.451	16.9196	17.1449	17.4808	18.0884
EFTUD2	A4FUD3;F1N6D5	37	18.2629	18.3139	18.3838	18.2809	18.2621	18.3781	18.4204
NDC80	E1BF82	11	15.6873	15.8104	15.6452	16.1608	16.0494	15.9445	16.1328
TBL2	Q0P5H6	17	17.3745	17.5998	17.7128	17.4178	17.3727	17.4375	17.7017
EIF3A	A0AAA9S6A7	59	19.5903	19.4729	19.475	19.7591	19.6249	19.4403	19.5598
MRPL39	Q05B74	15	17.106	17.101	17.0062	17.2706	17.3711	17.3933	17.0389
TRAP1	Q2TBI4	32	23.0287	23.0582	23.0412	22.9826	23.0735	23.1798	23.2442
PTGES2	Q66LN0;A0A3Q1LFK5	12	15.9195	16.0616	16.1588	16.0913	16.2478	16.0348	15.6776
WWP2	A0A3Q1NIL1	3	13.709	13.862	13.8545	13.9901	NA	13.6648	13.8929
OGT	A0A3S5ZPK0	30	16.2554	16.1864	16.4562	16.6925	16.4639	16.4277	16.3376
THUMPD1	Q24K03;A0AAF6ZNP5	10	17.2539	17.4336	17.2834	17.3878	17.3094	17.1052	17.4641
GALK1	A6H768;A0AAA9TPL4	14	17.6077	17.6037	17.5589	17.586	17.8075	17.4424	18.0191
SLC3A2	Q08DL0	17	19.3683	19.4178	19.2623	19.0036	18.7388	19.1079	20.5486
MPG	F1MKN2	8	15.6415	15.7178	15.7238	15.9209	15.8842	15.7234	15.607
TRAPPC12	A6QLC8	11	16.2742	16.2546	16.5033	16.649	16.5506	16.5229	16.8094
RPL34	F1ML72;A0AAA9SX40	4	20.9414	21.059	21.0154	21.2845	21.0046	20.9333	21.0086
VCPIP1	A0AAA9T9Z2	21	16.8261	16.9625	17.0763	17.0601	16.9408	16.842	16.912
CHAMP1	A0AAA9SEB0	9	15.081	15.1467	15.1116	14.934	15.1901	15.1374	15.6302
PLD3	Q2KJJ8	10	17.2346	17.4175	17.3133	17.2339	17.3754	17.1923	16.9983
NKTR	E1BJT5	5	14.4884	NA	14.3146	14.2466	14.1436	14.422	14.215
SZT2	A0AAA9TLH2	4	14.099	14.6669	14.4884	14.2039	13.9096	14.2067	14.6085
LONP1	Q59HJ6;A0AAA9S896	31	18.0583	18.1646	18.0524	17.8112	18.0214	18.0742	17.951
TOR2A	A4FUH1;P0C7W1	3	15.0471	15.4298	15.4926	15.0247	15.1596	15.2798	15.3992
FAH	A5PKH3;F1MYZ7	6	16.1742	16.1776	16.105	14.8426	15.1366	15.31	15.8249
MIA2	A0A3Q1MUH0	29	16.4728	16.3629	16.4858	16.1134	16.3181	16.4735	16.2238
IBTK	A0A3Q1MJU3	16	17.1063	16.6986	16.7213	17.3216	17.2385	17.1036	16.9799
INTS5	A1L552	9	14.6563	14.9278	15.0713	14.6106	14.6564	14.9677	15.2136
RAB10	A6QLS9	4	18.8305	19.0925	18.7625	18.7184	18.6089	18.7806	19.1901
IQGAP2	A0AAA9TLU6	56	16.9897	17.291	17.3701	16.4371	16.5016	17.2566	19.2772
CDCP1	G3N093	15	16.0245	15.9351	16.1417	15.6615	15.574	16.0772	16.4237
RNF145	F1MGV3	7	14.4411	14.4553	14.2076	14.9733	14.4556	14.8142	14.3094
MBD3	A0AAA9T4U1	9	16.6437	16.6947	16.7035	16.6609	16.7234	16.5991	16.8797
RBM19	A0AAA9TXU2	18	17.5881	17.5991	17.6551	18.0351	17.814	17.8246	17.7594
HSPH1	Q0IIM3	41	19.3909	19.2576	19.3191	20.2403	19.9868	19.6953	19.1602
VAMP7	A0AAA9SMQ2;Q17QI5	8	16.0999	16.1252	15.9673	16.3742	16.1711	16.0848	16.1289
SYNRG	F1MI41	19	15.9897	16.0933	16.1503	15.8964	15.9281	15.9498	15.7338
NDUFAF6	A7YVD7	6	15.174	15.0602	15.1321	15.2719	15.2117	15.2806	14.9434
MCM3AP	E1BJE7	14	16.0764	16.3106	16.5286	16.0679	16.0943	16.2617	16.3109
SLC25A20	Q3SZA4	8	17.5317	18.0206	17.804	16.2175	16.5926	17.32	16.781
DIS3L2	E1B7R0	16	16.0196	16.0431	15.7829	16.0801	16.0838	15.8551	16.2032
METTL26	A0AAF6YK97;Q32KX8	9	17.6553	17.2632	17.3465	17.7698	17.6307	17.3554	17.0673
UQCRQ	A0AAF6Z5L4;P13271	4	19.956	19.6166	19.7352	19.6068	19.9559	20.13	19.4736
PRRT4	G5E6N2	6	14.9399	15.4029	15.3335	13.7385	14.5173	15.2839	15.1041
CUL3	A0AAA9T669	34	17.6072	17.6095	17.6015	17.5553	17.509	17.4026	17.8911
LANCL2	A0AAF6DMH4	17	16.2303	16.3507	16.2028	16.2806	16.3405	15.9866	16.1914
LANCL1	F1MVX2;A0AAF6Z0W3	13	17.2406	16.9784	17.102	17.3289	17.2788	17.031	17.3164
MTRR	F1MGP5;Q4JIJ2	5	14.753	14.4973	14.6024	14.6196	14.6242	14.5982	14.7274
FLT1	A0AAA9SN20	4	14.5591	13.8503	13.9031	14.68	14.1963	14.5334	16.1407
BAIAP2	Q5EAD0	19	16.6144	16.2897	16.0617	17.1602	16.7848	16.5302	17.0588
DDR1	A0AAF6DMB3	5	16.7951	16.4701	16.91	16.0694	16.4699	16.8779	16.4207
ARHGAP18	A0AAF6DLS1	11	15.5395	14.9242	14.8839	16.0018	15.9374	15.3309	15.7456
ZNF451	E1BGM1	11	14.9723	14.9033	15.005	15.3278	15.4423	15.2682	15.1881
SSH3	F1MI92	13	16.1047	15.9427	16.341	15.9162	15.979	16.0573	15.9966
KDM6A	G3N2E9	13	15.3698	15.0021	15.4422	15.1134	15.017	15.0539	14.8114
IKBIP	A2VE53;A0AAA9RXF3	22	16.5467	16.6709	16.7158	15.6216	16.1178	16.6021	17.1066
UBR7	A3KMX6	12	15.4882	15.1235	15.2931	15.2597	15.2305	15.13	15.252
MAP3K4	A0AAA9SKK8	17	15.7395	15.4075	15.5942	15.9468	15.7259	15.6511	15.6173
MMP2	Q9GLE5;F1MKH8	12	14.2493	15.0388	14.4441	NA	NA	NA	17.2468
XRCC5	A7MBA7	16	16.7154	16.8428	16.8198	16.7197	16.5633	16.5821	16.9597
BCO2	F1N2Z9	11	16.7447	16.6432	16.9918	16.4515	17.001	16.664	15.8957
HSPA4	E1BBY7	42	20.8153	20.6406	20.6559	21.3104	21.0865	20.7647	20.7236
UBXN1	Q32KW2	7	16.0472	16.0998	16.2621	16.4257	16.3812	15.9973	16.0169
MGA	A0AAA9SHD9	26	16.0439	16.1812	16.3858	16.3431	16.3699	16.5009	16.4708
PTPN9	F1N6W1	8	14.5245	15.0386	15.3775	13.9624	14.2407	14.6669	15.4018
PFAS	A0A3Q1M913	36	18.3119	17.9103	17.8658	18.6934	18.5419	18.165	18.0348
CRYBG3	G3MZ11	5	14.0871	14.0082	14.0832	14.1231	14.5235	NA	13.8081
GPRC5B	Q1JPD9	3	15.1692	14.8519	14.5531	14.8028	14.813	15.1136	16.4913
SEC61A2	Q2KHX4	2	15.7386	15.9625	15.8417	15.6264	15.8749	16.0924	16.2462
SEC61A1	Q5EA68	5	20.3722	20.6984	20.3641	20.4825	20.4252	20.6795	20.5321
EOGT	A0JND3	13	17.6124	18.0797	17.5582	16.0606	16.6333	17.276	17.8719
ZNF24	E1B7S7	5	14.759	14.8441	14.801	14.6384	14.4016	15.0981	15.1389
RANGAP1	F1MFD5	24	18.2583	18.0647	18.1455	18.56	18.4301	18.1693	17.9215
CIZ1	A0AAA9RYD6	3	14.6993	14.8752	14.9706	14.3469	14.6558	14.5734	14.8221
IDI1	Q1LZ95;A0A140T853	14	17.8208	17.6055	17.3411	17.0831	17.6697	17.6719	17.3177
G3BP2	F6R199	13	16.9364	16.683	16.9186	17.1372	17.2166	17.1196	17.1691
SRSF7	Q3T106;A0AAF6ZBD7	7	19.754	20.0551	20.1029	19.6673	19.7434	19.9378	19.8367
PTPN13	E1BKT4	35	17.1036	17.0638	17.3421	17.4839	17.3258	17.1854	17.2274
NAA20	E1B843	6	15.7809	15.5105	15.8444	15.8581	15.6446	15.6104	15.7224
CLASP2	A0AAA9SFG5	30	15.9492	15.9159	16.0745	16.2538	16.2492	16.1063	16.4039
TP53I3	A0AAF6DM90	5	16.4484	16.2768	16.5209	14.9914	15.9429	15.8359	14.8791
VIPAS39	A0A3Q1M8C6;A5D796	13	16.4557	16.1727	16.478	16.586	16.4682	16.3888	16.3338
ACADM	Q3SZB4	13	17.5174	17.6876	17.796	17.1036	17.3783	17.5247	17.4686
ESD	A0A3Q1MAU7;Q08E20	9	19.3677	19.4901	19.4304	19.3712	19.429	19.1133	19.5784
TGFBRAP1	A0AAA9TU88;A7MB11	3	14.3706	15.1996	14.6184	14.8586	15.139	14.5984	14.4156
ZNF384	F1MGZ7	5	20.2964	20.204	20.3198	19.8382	20.0993	20.2286	20.0633
ACOX1	Q3SZP5;A0AAA9S704	22	19.4245	18.8409	19.1807	20.2237	19.8432	19.7743	18.4333
LZTR1	E1BLW3	2	13.5559	13.3943	13.65	13.2635	13.2148	12.9638	13.3794
ANAPC1	A0A3Q1N0U6	27	16.8908	16.8731	17.0117	17.0998	16.9317	16.9356	16.9539
TFRC	A0AAA9U1C1	18	17.6623	17.7073	16.992	17.1771	17.3177	17.5588	18.5101
RTCA	Q2HJ88	11	17.1427	17.4506	17.3391	17.0718	17.1321	17.161	17.2506
PLA2G15	Q8WMP9	13	21.0369	20.6165	20.9315	19.21	20.0135	20.4975	19.679
HSD17B12	F6RBM0;Q5E9H7	15	19.7082	19.7641	19.7385	20.173	19.7713	20.1648	19.4924
SLC12A9	E1BLP2	9	16.3248	16.0767	16.2391	16.2155	16.3318	16.0802	15.8089
BCR	A0A3Q1M4M7	10	16.1457	15.8906	16.4218	16.2427	16.3153	16.1624	16.2344
DDI2	A0AAA9S0B0	13	17.9508	18.2336	18.2173	17.8909	17.9625	17.8392	17.6783
FAM234A	A0AAF7A8K4;Q2HJE5	9	16.0356	15.59	15.9258	15.9144	15.9973	15.7993	16.5668
VPS45	F1MDA6	14	16.5024	16.8816	16.9419	16.6375	16.5966	16.6931	16.9135
ROCK2	A0A3Q1MW77;Q28021	34	17.3691	17.2067	17.2249	17.3522	17.4559	17.2536	17.4173
TIAM1	A0AAA9TPI4	8	15.0384	15.2365	15.4248	14.6633	14.9277	15.0158	14.6473
MRPL28	A0A452DJJ7;Q2HJJ1	8	15.8771	15.523	15.6315	16.0193	15.9434	16.0176	15.6186
RFT1	E1BNC6	2	15.9207	15.8867	15.9491	15.4553	15.7336	15.8798	15.8433
UPF2	F1MQ83	20	16.3145	16.1909	16.1932	16.2753	16.2491	16.2016	16.3504
ARAP1	F1MHU2	26	16.677	16.6544	16.7678	16.6758	16.745	16.5717	16.6385
FZD6	F1MP23	6	14.6351	14.4465	14.3169	14.3702	14.5867	14.3002	14.5419
KDM5A	A0AAA9SX17	4	13.8989	14.2603	14.3117	13.5891	13.6766	13.6223	NA
ODR4	F1N582	13	17.2976	17.0319	17.2533	17.2087	17.0773	17.3253	16.9724
KIF1B	A0AAA9SS56	14	16.8796	16.6471	16.6992	17.0462	16.949	16.7626	16.9313
KIF1A	A0A3Q1M6P0	4	13.382	13.281	NA	13.2906	13.1697	13.2337	15.073
PSME2	Q5E9G3	12	17.3851	17.1623	17.311	16.8177	17.1562	17.0135	16.5992
CRTAP	E1BJ75	11	15.6339	15.8198	15.2809	15.2695	15.5134	15.9518	17.4598
FIGNL1	A0AAA9S319	4	12.554	12.5531	13.1163	13.3285	13.0499	12.9601	12.7683
OAT	F1MYG0;Q3ZCF5	18	19.2511	19.1967	19.0525	19.4571	19.5388	19.4655	19.5648
IGFBP7	F1MPP2	6	14.1802	14.2544	13.565	13.8735	14.107	14.1547	15.6731
ALDOA	A0A3Q1NGQ6	7	22.5213	22.1682	22.0939	22.3392	22.2888	22.0416	22.224
PCNP	A0A452DIL1;Q32PF3	6	17.7871	17.8237	18.1328	18.0978	17.7346	17.9249	18.4192
DGUOK	Q2KIN2	3	14.5913	14.0881	14.0968	14.177	14.3387	14.3648	14.0427
CCT2	Q3ZBH0	34	19.882	19.8155	19.6649	20.3007	20.0507	19.78	20.0307
ANKRD17	F1MI56	17	15.8931	15.7676	15.9373	15.8573	15.9198	16.018	15.9195
NFKB1	F1MKW9	13	15.1563	15.1589	15.2129	14.9676	15.1432	14.9859	15.2248
TRADD	Q2KI74	7	16.4705	16.2948	16.3093	16.6601	16.537	16.4014	15.8681
OSBPL1A	E1BLV1;A0A3Q1MW81;A0A3Q1M0E7	26	16.6961	16.5559	16.6781	16.5676	16.4895	16.3819	15.7731
UBR1	E1BIW0	44	16.9848	16.8357	17.0565	16.9555	16.9448	16.9022	16.5319
DDAH2	Q3SX44	7	16.0259	15.7591	15.7186	15.6993	16.6166	15.7444	16.9874
MDH2	Q32LG3;A0AAF6YTP4	19	22.5912	22.9271	22.7495	22.2627	22.4551	22.6148	22.7178
RPLP0	Q95140;F1MDN4	11	21.5956	21.9248	21.6252	21.7486	21.5621	21.5358	21.5504
WLS	A0AAA9SG68	6	16.4359	16.5947	16.3809	15.8212	16.3717	16.4568	17.824
EPG5	A0A3Q1LTM3	22	15.4385	15.3038	15.395	15.5452	15.5189	15.4064	15.0774
CEBPD	O02756	3	14.7795	15.3572	15.3235	14.9335	14.8365	15.3811	14.7751
LOC112445612	G3X7Y5;A0A3Q1N5M8	3	13.1826	NA	12.1346	14.9342	14.2221	13.6845	NA
COMMD5	Q5E9K1	3	16.1478	15.9122	16.0292	16.3257	16.2884	15.9104	15.7906
XXYLT1	Q1RMU6;A0AAA9S0D2	5	16.0049	15.9735	16.1697	16.2117	15.9677	16.0043	16.2401
NFKB2	A0AAA9T421	11	14.0567	14.7832	15.0555	13.9708	13.7962	14.4584	14.6152
DHODH	A0AAA9TN03;Q5E9W3	15	16.2711	16.0362	15.9129	16.483	16.2771	16.3718	15.8687
TMEM160	Q24JY6	2	16.4729	16.5634	16.4243	16.5771	16.3819	16.738	15.9045
SLAIN2	Q3MHV6	14	16.2253	16.0902	16.3896	16.4414	16.6796	16.2752	16.0677
GLB1	Q58D55;A0A3Q1NDQ7	12	20.8323	20.3351	20.2562	19.6924	20.0096	20.2796	19.5437
OBSL1	E1BNH9	3	13.4605	13.3994	13.2511	NA	12.8198	12.8254	15.2068
NUP210	F1MPW7	38	16.759	16.2388	16.4126	16.9468	17.0207	16.7987	15.6407
ADAMTS1	A7MB07	7	14.9317	NA	15.5687	15.4989	15.2332	15.0847	16.355
TXNL1	A0AAA9SQ31	14	18.4802	18.4516	18.5012	18.674	18.6197	18.3719	18.4938
MICU2	A0AAF6DLX3	9	16.2156	16.0773	16.3693	15.8174	16.0251	16.32	15.9332
RAD54L2	E1BEK4	7	15.2623	15.2549	15.138	15.4933	15.2464	15.0595	15.3622
DMXL1	A0A3Q1NC20	30	16.2317	16.5502	16.0995	15.9701	16.7013	16.0799	15.9129
DUS1L	G3N340	3	14.6649	14.326	14.1928	15.039	14.8385	14.6845	14.5137
NEU1	A6BMK7	10	18.4454	18.4824	18.0846	17.6629	18.7216	18.6277	17.1523
KDM1B	A0A3Q1LGR3	8	16.8631	16.7563	16.6054	17.0475	17.0576	16.7502	16.59
ZNF512	A4FV61;A0AAF6ZBL8	10	14.7489	14.8221	14.826	14.7394	14.6654	14.9088	15.9672
OPLAH	A0A3Q1LQE0;Q75WB5	19	17.4739	17.1868	17.3569	17.2746	17.4107	17.1321	16.8821
RCN3	Q2KJ39;A0A3Q1NEH4	11	16.6346	16.6626	16.0674	16.4518	16.1793	16.8514	18.9378
SCRIB	A0A3Q1LUY1	20	17.2298	17.1289	17.3014	16.9258	17.0511	17.1685	17.2018
EMILIN2	A0A3Q1LL18	40	19.4798	19.832	19.3753	18.1927	18.6447	19.4519	21.6118
ETFB	Q2TBV3	10	18.6538	18.8118	18.8857	18.4462	18.6372	18.8056	18.6049
HDGF	Q9XSK7	13	18.1921	18.2928	18.2365	18.1022	18.0973	18.1649	18.6768
GTF2B	Q2KIN8;F2Z4J6	14	16.7301	16.7742	16.9018	17.0423	16.884	16.7171	16.5948
PEX13	Q0P5B1;A0AAF6YN83	2	14.0655	14.3689	14.0974	14.8129	14.6296	14.7192	14.0136
C3H1orf50	A0AAA9S6E2	7	15.7034	15.4003	15.5267	15.5098	15.3161	15.3941	16.2167
TM9SF1	F1MCZ2;A4IFE9	10	16.7642	16.6292	16.6013	16.3369	16.5869	16.7982	16.7502
CTH	Q58DW2;E1BNH2;A0A3Q1M2L1	18	17.9217	17.5922	17.7725	18.4425	18.488	18.1247	17.4843
CARM1	A0A3Q1MWG1	13	17.166	17.0721	17.0605	17.2469	17.1451	16.9738	16.7427
YBX3	A0A3Q1LIJ0	5	17.024	17.0225	17.0303	18.1675	17.9395	17.715	17.3859
QSOX2	E1BBS6	18	15.9809	15.8741	15.8062	15.7934	15.7419	15.7649	16.2509
PXN	A0AAA9SQ71	15	16.9111	16.8298	16.8422	16.9155	17.0718	17.0037	17.2442
HARS1	A0AAA9U239;Q2KI84	10	18.0414	17.8059	17.8072	18.4073	18.2387	17.9583	18.4335
KIF21A	A0AAA9S5G5	14	15.4087	15.3471	15.3281	15.7715	15.4335	15.4955	15.6696
GPT2	A0AAA9TCH2	12	17.2299	17.0657	16.8252	16.3205	17.2477	17.0913	16.4993
NME7	Q5E9Y9;A0AAA9U2I0	8	15.4925	15.4666	15.2577	15.3158	15.2139	15.3024	15.651
STAM	A0AAA9SD62	6	15.8943	16.0407	16.066	15.8981	16.0775	15.939	16.2422
RTKN	F1MS34	14	15.1821	15.5441	15.5098	15.247	15.2914	15.5321	17.2209
MRPL58	Q3T116	4	17.1331	16.953	17.1841	17.1392	17.2456	17.3756	16.9083
RPS18	A0A3Q1MQW8;Q3T0R1	10	21.513	21.8406	21.7298	21.7879	21.592	21.6096	21.6451
TOP2A	F1MDU7	51	19.8725	19.7392	19.5519	20.6213	20.1141	19.9907	20.1544
PALS2	F1MU05	16	16.0563	16.1956	16.1708	15.2114	15.0725	15.6851	16.666
LRRC66	E1BQ13	6	14.8572	14.6379	14.5826	15.6313	15.3036	15.1134	14.1051
ECPAS	A0A3Q1LRQ5	43	17.3469	17.3609	17.4288	17.2443	17.2338	17.221	17.7021
PIGO	E1BPZ8	9	15.6756	15.6139	15.8076	15.6282	15.6331	15.8829	15.8735
GOLGA2	A0A3Q1LTM9	29	17.1698	17.15	17.3239	17.0434	17.0043	17.0968	17.175
ACBD5	A0A3Q1MY50;P07106	10	17.6613	17.561	17.8127	17.5919	17.8938	17.844	17.7464
MYLK	Q28824;A0AAA9SS38	7	15.4382	15.0445	15.4168	15.7718	16.2167	15.8026	15.7828
MANBA	A0A3S5ZPJ9;Q29444	21	17.8546	17.2594	16.8437	17.7612	17.7041	17.237	16.1266
UCKL1	E1BP85	7	15.2537	15.3325	15.1636	15.3709	15.3948	15.1908	15.1695
ECT2	F1MJ58	20	16.4043	16.4851	16.5313	17.0772	16.8061	16.6325	16.3442
KIDINS220	A0A3Q1MAP2	10	16.4887	16.4917	16.388	17.0059	16.7262	16.6825	17.184
LOXL3	E1BFC8	4	14.3637	14.2838	14.2449	14.0123	13.9115	14.2309	14.0685
MSH6	E1B9Q4	41	17.5147	17.2752	17.2234	17.4947	17.5019	17.5365	17.5144
ZNF638	A0AAA9TB71	39	16.5833	16.7101	17.0411	16.6473	16.6471	16.8458	16.8475
DNAJC11	Q2NL21;A0AAA9RZQ8	15	16.5734	16.4378	16.3664	16.9797	16.672	16.7514	16.1645
USP7	A0AAA9S7W6	39	17.6487	17.4745	17.6692	17.5958	17.6624	17.5234	17.5643
XIAP	G3MWG5	9	14.7315	15.1485	14.9962	14.887	14.9106	14.8571	15.7642
BRAF	A0AAA9T2F0	5	15.9065	15.6979	15.8001	15.6559	15.8328	15.7474	15.0403
HES1	Q3ZBG4;A0AAF6YGT8	2	14.3776	14.2158	14.039	14.214	14.0238	14.549	13.7511
BUD23	Q58DP0;A0A452DIR9	5	16.7646	16.3305	16.2341	16.9822	16.6918	16.473	16.4809
MTTP	P55156;F1MDA1	35	16.3418	16.7048	17.1086	15.5182	15.036	16.5516	19.5485
METTL9	Q0VCJ8;A0AAA9STE5	4	16.2486	15.9212	15.101	16.3482	16.007	16.1766	16.9799
NAT10	F1MPG7	38	17.6008	17.7799	17.6944	17.6586	17.4601	17.6811	17.7056
PTPN6	A0A3Q1M739;F1N376	25	20.7772	21.3574	21.7656	19.2739	19.8479	20.4512	20.3186
RCC2	A6QL85	19	18.6299	18.5208	18.5618	19.0077	18.7624	18.5608	18.5487
SYNGR1	A0AAA9TPD3	2	16.6451	16.7031	16.5405	17.1815	17.0105	16.7103	16.4507
PAXBP1	F1MBJ4	17	16.4722	16.5731	16.6381	16.401	16.4232	16.5839	16.4506
OXCT1	Q24JZ7	11	15.0687	15.622	15.3166	15.5145	15.711	15.7149	16.1404
COTL1	Q2HJ57	10	21.0834	21.1734	20.9557	20.6193	20.77	20.6373	21.5011
EIF2S3	Q2KHU8;A0A3Q1M1J7	17	19.1792	19.2164	19.2874	19.3205	19.2074	19.0372	19.1338
POLR1G	F6QVL1	9	16.6142	16.814	16.7686	16.8171	16.7361	16.6253	17.0438
LRATD1	Q3ZCA1	7	15.5751	15.9102	16.0847	14.9074	15.1013	15.6564	14.684
XPO5	A0A3Q1ME79	35	16.6994	16.7387	16.5894	17.0723	16.8714	16.6058	17.1183
PRPF38B	G3N166	11	15.9696	16.2507	16.1559	15.7944	15.8924	16.1077	16.2134
PPTC7	E1BEW5	7	15.0079	14.8168	15.006	14.4599	14.9025	14.8797	14.7753
SPCS2	E1BEI2	8	19.4468	19.4392	19.5163	19.273	19.3333	19.5987	19.1461
AFG2A	A0AAA9RXI8	8	14.6443	14.5084	14.6266	14.7891	14.6837	14.3942	14.5809
TRAPPC4	Q2TBL9	8	16.1675	16.3492	16.3845	15.9862	15.9633	16.1363	16.4316
GCLC	A0A3Q1MN33	22	16.7713	16.8446	16.5819	16.9164	17.0047	16.7269	17.5281
P4HA2	G3N2F2	15	15.5826	15.7165	15.1879	15.5844	15.4921	15.7972	17.6956
NDUFV3	A0A3Q1N7L1;P25712	14	18.4401	18.4028	18.4685	18.3368	18.4909	18.6733	18.1501
PSMB1	G5E589;Q2TBX6	12	18.7582	18.6993	18.7312	18.7749	18.7481	18.6554	18.654
PPP1R9A	A0A3Q1LTT3	18	17.0559	17.1129	17.3704	15.77	15.9246	16.948	16.175
EPN2	F1MYK3	7	15.866	15.7011	15.8182	15.7357	16.0083	15.8345	16.4621
LMF2	A1L504;A0AAA9RV78	6	16.486	16.5239	16.5456	16.0173	16.2098	16.5854	16.8009
ARMC6	A0A3Q1NCV1	6	16.2057	16.4722	16.3093	16.2105	16.0224	16.2309	16.6459
SMARCC1	G3N0H4	18	17.6531	17.2792	17.7398	17.7963	17.76	17.6977	17.5181
RPA1	Q0VCV0	22	17.4513	17.441	17.4428	17.4821	17.4707	17.2832	17.4519
SCIN	Q28046;F1MCZ3	25	18.0864	18.5853	18.6735	18.8506	19.6177	18.9786	18.2973
SCCPDH	Q3T067;F1MX05	8	16.4105	16.3655	16.3226	17.011	16.8923	16.6855	15.9038
ASMTL	G3MY50	8	16.39	15.8291	16.0374	16.1581	16.0349	16.1534	16.1673
HCFC1	E1BGF3	30	16.8832	16.9308	17.0773	16.9439	17.049	17.0746	17.2548
CXHXorf38	G3X6Y2	6	15.5103	15.3487	15.4906	15.776	15.784	15.6419	15.8748
CYBC1	Q3SZM3	3	14.4385	14.3378	14.3138	14.1654	13.9286	14.1198	14.1267
GAA	A0AAF6Z2G3;Q9MYM4	22	20.2913	19.7377	20.1113	18.9389	19.004	19.2836	18.0609
CTSB	P07688	19	23.369	23.5067	23.2114	24.1026	23.9269	22.9575	22.3603
YARS2	A5D7G0	11	16.9375	16.8381	16.9466	17.0593	17.0263	17.1224	16.7791
PAM16	F2Z4I9	4	15.3409	15.3504	15.3596	15.3782	15.6138	15.7361	NA
USP19	F1MUD4	21	15.6689	15.331	15.528	15.8403	15.8422	15.7657	15.6431
ENPP5	F1N5W4	9	16.8934	16.0296	14.0282	16.9172	16.6632	15.1105	13.6551
MAN1A2	E1BI49	9	15.3814	15.2417	15.2498	14.7548	14.9173	15.3138	15.3948
FBP1	Q3SZB7	14	16.7904	16.9652	17.4088	14.057	13.9061	15.5533	15.4324
GATB	F6QL75	6	15.0322	14.5114	14.8933	14.9845	15.1819	15.2725	14.6121
MCM7	Q3ZBH9	37	19.0746	18.8764	19.1119	19.0737	19.0187	19.0594	19.2209
ST6GALNAC2	A0A3Q1LRX1	5	15.2657	14.7343	15.2601	15.6747	15.4693	15.5012	14.9323
NCDN	Q2KJ97	16	15.4885	15.5875	15.3331	15.8969	15.4706	15.316	15.579
ACAT1	A0AAF6YY96;Q29RZ0	15	17.8301	17.9649	17.8725	17.6771	17.9187	17.9774	18.0819
AHCY	Q3MHL4	23	20.2102	20.0288	20.1773	20.1665	20.2771	20.1852	20.9546
CUL1	A0A3Q1M2H6	29	17.0691	16.9403	16.9237	17.1154	17.0834	16.8192	16.6921
MCM5	Q0V8B7;A0AAA9TCV3	36	18.874	18.8083	18.9246	18.8762	18.7117	18.7077	18.9744
RRBP1	F1MDC1	43	19.7041	19.7499	19.9403	19.8616	19.7923	19.7971	20.2435
MCM2	A0AAA9SSL6	33	19.0707	18.9191	18.9606	19.1211	18.9018	18.8889	19.1161
RPL10A	Q5E9E6;G3X7N2;A0AAF6Z704;A0AAA9TZ19	9	20.8037	20.6984	20.9393	20.9626	20.8759	20.947	20.7979
SLC25A13	F1MX88	18	18.2353	18.2125	18.1216	17.9499	17.8717	18.2028	17.8005
TRIM56	A0AAA9SZH9;E1BD59	17	15.841	16.0249	15.9478	15.8956	15.9166	15.9	15.3057
DPP8	F1N1L4	8	15.0567	15.1379	15.1755	15.0595	14.9099	14.6452	14.6797
DPP9	A0AAA9TGY1	13	15.9846	15.9076	15.684	16.0237	16.1251	15.6321	15.5989
TOMM70	Q08E34	23	19.1653	19.2602	19.3342	19.2908	19.3017	19.4456	19.1105
SALL4	E1BJZ5	12	14.783	14.5349	14.9729	15.5558	15.4506	15.1005	16.2802
MAN2A2	A0A3Q1LI72	18	15.6913	15.7472	15.5352	15.0077	15.2364	15.4756	15.2247
KRT15	A0A3Q1LJB2;Q17QL7	7	20.5752	21.0443	20.3832	18.9713	19.5533	19.7462	20.1502
IBA57	E1BC94	7	18.2488	18.399	18.4969	17.8933	18.1812	18.3994	18.1862
AARS2	A0AAA9SW81	23	15.8646	15.6736	15.5699	15.848	15.9786	15.9047	15.4813
RANBP10	F1MSI0;A3KMV8	10	15.8056	15.702	15.7301	16.1302	15.8516	15.8189	15.8866
ACADVL	P48818;A0AAA9SJ11	27	19.6108	19.9851	19.8284	19.3167	19.6217	19.8182	19.3338
LIN9	F1MIQ3	4	13.7689	14.2116	13.9568	14.1425	13.9601	14.0051	13.951
PPL	F1N2K8	28	16.3986	16.6469	16.6225	16.1967	16.7836	16.4123	16.5433
MRPS18A	P82919;A0AAA9S1F2	6	16.7018	16.5322	16.5783	16.8802	16.759	16.9631	16.5388
CCAR1	Q17R04	23	16.988	16.9398	17.2343	16.8348	16.9441	17.0652	17.0905
DGCR8	A6QR44	9	14.7843	14.8562	15.1274	15.0172	14.9165	15.2057	15.0253
VPS33B	Q2HJ18;A0AAF6YGW2	16	17.7603	17.6169	17.5217	17.5646	17.6816	17.4235	17.7377
TCIRG1	Q1RMS1	13	16.9985	16.899	17.1464	16.1621	16.6043	16.8451	16.6328
PPP2R5D	F1N1S8	13	16.8237	17.0841	17.0554	17.0448	16.9704	16.9154	17.4955
PIGZ	E1BCR7	5	14.125	14.3179	14.3218	12.9799	13.4545	13.9119	13.4216
PDZD11	Q32LE7	6	17.2579	17.3792	17.6953	16.7941	17.0736	17.4024	16.9242
TOM1	Q5BIP4	20	18.1269	17.9492	18.1688	18.1142	18.2107	18.1546	18.2593
PEX16	Q2KII7;A0A3Q1NJR3	11	17.0065	16.7261	16.8573	16.9089	17.1385	16.9935	16.5055
COG6	Q3SZI7;F1MLE3	15	15.7702	15.7608	15.7921	15.6396	15.6723	15.5922	15.589
ATL2	A0A3Q1LP31	14	17.2366	17.2985	17.4704	17.1884	17.1821	17.3332	16.7593
DDX54	A0A3Q1MU57	18	16.6364	16.6622	16.9897	17.0832	16.994	17.0734	17.0687
PRPSAP1	A0AAF6ZDQ7;Q08DW2	12	17.7619	17.3961	17.5532	17.8196	17.802	17.6408	17.1939
PRPSAP2	A2VDS0	7	15.9018	15.269	15.5623	16.4329	16.5331	16.1795	16.5016
ATP5PD	P13620	10	20.2693	20.1812	20.1114	20.0069	20.1205	20.2371	19.9129
SNTB2	F6QN89	15	17.0928	17.1544	17.3432	17.0357	17.2106	17.3477	17.5932
ACSM2B	A0AAA9S5R6	6	16.9287	17.3253	17.7045	NA	NA	15.1434	16.5374
SPOUT1	F1MXD0	12	16.2091	16.0493	16.1511	16.3722	16.3625	16.3221	16.3092
SLC27A1	F1MB67;Q3ZKN0	16	16.4317	16.2456	16.4404	15.6826	15.7215	16.0979	15.5952
MRM3	E1BBM0	9	16.3435	16.4123	16.0991	16.6533	16.5556	16.3193	16.2754
GSTK1	A0AAA9TW47	11	16.9721	17.104	17.2843	16.3184	16.7687	16.9897	16.5917
PDPK1	A0AAA9TJF9	15	15.3244	15.2654	15.4918	15.5105	15.4919	15.3217	15.5353
RPL7	A0A3Q1LP69;Q58DT1;A0AAA9SNT9;A0AAF6Z7G1;A0A3Q1LKR0;F1N7A3	18	21.9819	22.0286	22.2596	22.2881	22.0096	22.1275	22.2103
HECTD1	E1BLD1	42	16.2151	16.0408	16.0938	16.644	16.3497	15.9575	16.0482
TAOK2	A0AAA9RVB1	4	14.3814	14.7694	14.5776	14.4957	14.4727	14.1392	14.4475
CUL4A	F1N3S4	20	18.3131	18.2655	18.313	18.4586	18.3296	18.1213	18.4056
RPL22	A0AAA9SFF8	5	21.4855	21.8601	21.6351	21.6956	21.5086	21.3664	21.405
STK10	A0A3Q1M334;E1BK52	27	17.6769	17.4716	17.3364	17.5193	17.5589	17.279	16.8525
MED14	G3X6Y3	21	16.3549	16.4781	16.5292	16.3324	16.3393	16.4576	16.4235
VPS4B	Q0VD48	10	18.7169	18.9272	18.5291	18.5906	18.6523	18.4464	18.8622
CABIN1	G3X746	3	15.6904	15.4116	15.9525	15.8917	16.3161	15.5124	15.8527
ATP5MK	A0A3Q1ML84;Q3ZBI7	4	19.1288	19.001	19.0754	18.9853	19.145	19.3951	18.7174
ZC3H18	G3MX37	10	15.4077	15.5103	15.6241	15.3997	15.5339	15.621	15.4356
TEX10	A0A3Q1M1K0	19	16.7177	17.1029	17.2348	16.5766	16.6301	16.9343	16.6189
EMC3	Q3ZCB8	10	16.9367	16.9876	17.1137	16.9371	16.9468	16.9898	16.841
STAU2	G5E523	6	15.4359	15.7024	15.8763	15.1901	15.1524	15.537	15.9267
STK26	A0A3Q1MJL8	8	17.3176	17.7379	17.9019	16.6948	16.7203	16.6481	17.3698
SMG9	Q2YDD2;F1MBJ5	7	15.9342	15.9918	16.0873	16.2238	16.1998	16.056	16.0929
BYSL	Q5E9N0	17	17.0764	16.9284	17.1538	17.6568	17.4433	17.3163	17.2062
NIPSNAP1	Q0P5K8	8	18.0303	17.949	18.1266	17.3706	17.7357	18.1951	17.7522
HS1BP3	A0A3Q1LSP6	11	17.9514	17.9704	18.1294	18.2458	17.9224	17.89	17.733
ABCC10	E1BNL1	15	15.5865	15.7001	15.5849	15.139	15.0863	15.3893	15.2477
FAM83H	A0A3Q1M4P9	19	15.2685	15.4955	15.6453	15.3684	15.3841	15.3654	15.3977
SUGP1	A4FV64	12	15.8431	15.9305	16.1208	15.7423	15.8402	15.9352	16.0428
ADM	A0A3Q1MLI7;O62827	5	15.8374	17.0182	17.3038	NA	NA	NA	15.3443
MRPL11	A0AAA9RV64;Q2YDI0	9	17.4497	17.6145	17.575	17.5042	17.6596	17.7113	17.398
PGD	A0A3S5ZPM3	25	20.7837	20.7951	20.743	20.5781	20.7095	20.5549	21.3937
CNN2	Q3SYU6	11	18.682	18.7766	18.8561	18.562	18.7209	18.8213	19.5173
FA2H	E1BGC2	5	14.932	15.4368	15.3718	13.9834	14.489	14.6938	14.2981
SLC29A1	F6PZI3	10	16.9748	16.9348	16.7201	17.5753	17.5143	17.448	17.9661
DCP1A	F1N4I7	9	16.4968	15.9909	15.9774	16.1514	16.1492	16.4598	16.318
ANAPC7	E1BM34	14	16.2037	16.0509	16.2398	16.295	16.2572	16.383	15.9959
HOOK2	A0AAA9SN40	11	15.8449	15.8452	15.9041	15.5017	15.8544	15.8909	15.5994
TFB2M	Q32LD4	8	14.2326	14.0965	14.1211	14.6271	14.4425	14.5605	14.1397
ZFYVE26	A0A452DJ92;E1BLZ4	23	15.963	15.9543	16.0263	15.9616	15.8652	15.7165	15.545
CNN3	Q32L92	11	20.566	20.4667	20.5548	20.8399	20.5718	20.6682	21.233
AAK1	F1MH24;A0A3Q1LT42	27	18.8395	18.8463	19.052	18.7009	18.8568	18.8964	19.0089
ALG9	A0AAA9TM73	14	16.4064	16.5692	16.6085	15.7848	15.8616	16.3387	15.9934
IRF3	Q4JF28	7	17.9183	18.2724	18.0905	17.6845	17.8669	17.8612	18.6043
GREB1L	A0A3Q1MQZ3	41	16.2978	16.3184	16.5105	16.3367	16.3243	16.5105	15.9596
ABL2	F1MWH8	8	16.6787	16.484	16.7985	17.0192	17.0371	16.8706	16.9967
MYD88	A0A452DHW6;Q599T9	8	15.5648	15.5765	15.4961	15.58	15.317	15.3582	15.1102
QTRT2	F6Q3R4	11	15.384	15.189	15.2401	15.618	15.7107	15.3379	15.8689
SELENOO	G3X686	5	14.4912	14.5914	14.64	13.5819	13.8591	14.0686	14.4546
MISP3	F1N705	6	17.3128	17.2793	17.5822	15.0108	15.6656	17.0362	16.4193
ESPL1	F1MW01	19	15.8559	15.3565	15.379	16.4493	15.8988	15.7077	15.6969
WWC2	F1MZS1	14	15.3307	16.1924	16.0629	14.6985	14.3512	14.8563	15.7021
MYO6	E1BPK6	59	19.0169	19.1946	19.4422	18.443	18.6895	18.9775	18.6891
LAD1	A0A3S5ZP82	12	16.5654	17.3658	17.3435	16.2976	16.9957	16.9292	16.3164
RSF1	A0A3Q1LP30	16	17.1931	17.0705	17.0765	16.9529	17.0358	16.982	17.0928
STT3B	A5D7G6	13	18.6815	18.6834	18.7149	18.2965	18.6097	18.8711	18.4577
BAG6	A0AAA9S5L9	20	18.599	18.4272	18.4813	18.8012	18.7437	18.5585	18.2709
KRI1	Q0V8M0	12	16.2507	16.3597	16.5077	16.1439	16.2007	16.3677	16.5751
OSTF1	Q8MJ50	11	19.2459	19.389	19.359	19.2441	19.1892	19.0137	19.037
PTPN1	A0AAA9TFV5	20	17.0294	17.2132	17.203	16.6704	16.7316	17.011	17.0832
VWA8	F1MIM5	44	18.5914	18.6836	18.6573	18.3337	18.438	18.6389	18.1959
CORO7	A0AAA9T466;Q0V8F1	19	17.1623	17.023	17.0781	17.2445	17.0369	16.687	16.3014
PALM3	A0A3Q1LZW1	9	14.5399	14.5612	15.2079	14.0772	14.048	14.9044	15.8491
TRIP13	F1N3B9	12	17.0266	16.5916	16.5013	17.3131	16.992	16.7996	16.9666
MRPL41	A5PJ71	6	16.5766	16.4932	16.4599	16.338	16.1677	16.313	16.3299
BAZ1B	E1B6X6	39	16.0973	16.0331	16.2363	16.0126	16.0456	16.3335	16.298
FRMD8	F6QQB6	10	16.0013	16.1365	16.2795	15.7644	15.7628	16.0722	16.292
PHGDH	A0A140T866;Q5EAD2	26	20.8334	20.0513	20.6439	19.7106	19.7776	20.0736	19.3115
PHF3	A0AAA9T2E9	10	14.6665	14.6975	14.9942	14.7215	14.6815	14.7107	14.7524
CERS2	A0AAA9TYA9;Q3ZBF8	7	18.0747	18.1219	18.0894	18.1649	18.0891	18.4771	18.4407
COL23A1	F1MSJ7	2	14.0521	14.4672	NA	NA	13.8021	14.777	16.3786
UTP14A	Q3T0Q8;A6QLB4	23	17.38	17.5425	17.5491	18.1077	17.9859	17.9103	17.7361
ITGAV	P80746;A0A3Q1MXS2	26	16.7537	16.9428	16.5803	16.0555	16.206	16.6003	17.2297
GATA3	Q08DV0;A0A452DIR6	9	16.6068	16.3715	16.7044	16.7115	16.7314	16.7541	15.9275
CAPN6	E1BJ18	18	14.452	14.2228	15.3206	NA	NA	13.6754	16.6372
UNC13D	E1BFF0	19	16.0383	16.763	16.8201	14.2874	14.5126	15.0454	15.192
CORO2A	Q32LP9;A0AAA9TQU6;A0A3Q1LJQ5	15	17.7782	17.8354	18.2055	16.7212	17.0164	17.4975	18.246
NUP160	F1MZR0	35	18.9161	19.1885	19.2276	18.908	18.8703	19.0428	19.1448
TTC9C	A0AAA9RWC7;E1BJN0;A4IFF3	4	15.8169	15.7709	15.9679	15.7237	15.8002	15.8215	16.0805
NFRKB	F1MPR9	8	14.0564	14.2054	14.7401	14.4177	14.5158	14.5819	14.4332
NAGK	A0A452DJF8;Q3SZM9	10	17.093	17.149	17.4533	17.344	17.1891	16.9665	17.0838
GDPGP1	Q5E9T1	7	15.1189	15.3071	15.137	15.244	15.4812	14.996	15.1452
FBLN2	E1BEB4	40	20.3494	20.7783	20.5144	19.3456	19.7555	20.4207	22.4821
PDZK1	Q3T0X8;A0A452DI72	17	16.7337	16.445	16.9665	17.2211	17.2441	16.7028	16.725
MPPE1	A0A3Q1MCX7	9	16.1253	16.7291	17.0421	15.5168	15.7286	16.519	15.9517
RTRAF	Q3T0S7	13	18.4793	18.4709	18.314	18.5493	18.2936	18.1959	18.3476
PDCD6	A0AAA9T4F5	7	18.1635	18.3266	18.6074	18.0594	17.9459	18.1298	18.3177
RPL7A	Q2TBQ5;A0AAA9S7M5	17	21.6961	21.5888	21.6398	21.8433	21.707	21.7111	21.5436
EIF2B4	Q3T058;A0A3Q1LPP5	8	16.3262	16.1566	16.3837	16.4888	16.3566	16.212	16.3896
PAF1	Q2KJ14	16	16.8668	17.0003	17.0189	16.9608	16.9704	16.9661	17.0684
ESYT2	A0AAA9SS32	27	17.6758	17.8953	17.9815	17.0049	17.3074	17.7209	17.972
THAP11	A5PKF5	4	14.722	14.7617	14.4144	14.3455	14.6264	14.5853	14.6974
CPOX	E1BKY9	19	17.9974	17.9841	18.151	18.1303	18.171	18.3004	17.753
STARD10	F1MXU5	12	18.848	18.4203	18.6878	18.4974	18.5587	18.3667	17.5574
CMBL	F1N2I5	7	16.9374	16.4605	16.497	17.4584	17.6436	16.8967	16.4322
PGS1	A0AAA9T2G4;Q2KJ28	10	15.4102	15.647	15.5637	15.0713	15.0884	15.4741	15.1529
ACTR5	A0AAA9SR01	7	15.1291	14.9899	15.2241	15.2231	15.1637	15.3609	14.9319
MFN2	D7GLD0	15	15.7016	15.648	15.6536	15.6129	15.6484	15.4513	15.304
PFN1	P02584;E1BHJ0	12	23.3285	23.5876	23.3345	22.8906	22.9117	22.9902	23.0427
HSD3B	P14893	8	15.3626	15.1327	15.6881	16.7759	16.8635	15.7021	14.0509
NDUFA10	P34942;A0AAA9SAR7	14	18.3685	18.2881	18.3697	18.0016	18.2053	18.4213	18.2072
SEC23B	Q3SZN2	22	19.3016	19.4331	19.3607	19.3933	19.294	19.2708	19.4758
TRANK1	A0AAA9SEL9	5	13.2434	13.1085	13.1553	13.7302	13.5081	12.8821	13.7233
ZFR	F1N0Y9;A0A3Q1MI58	24	17.4295	17.2667	17.5338	17.3772	17.4577	17.4084	17.4788
FXR2	A0A3Q1MDB8	11	19.7706	19.8635	20.0565	19.7385	19.8334	19.9018	19.757
FBLN1	A0A3Q1MJB2	7	14.8071	15.5312	15.1706	14.295	14.1931	14.8038	17.1494
AIP	A0A3S5ZP93;Q7YRC1	9	19.1181	19.2997	19.3119	19.3826	19.3956	19.1831	19.8544
ARHGAP1	F6RWK1	19	18.4309	18.7501	18.8352	17.7635	18.031	18.155	18.2777
LRRC8D	A4IFE5	22	17.2832	17.1192	17.071	16.93	16.8588	17.2213	17.2796
PRKCI	F1MQ96	13	17.0958	16.6996	16.8249	16.7448	16.9952	16.923	17.3016
EIF2B3	A0AAF6DMG9;A5PJI7	19	16.9266	16.7967	16.6903	17.1959	16.9989	17.0063	16.8653
CSTF1	A0JN63	9	17.5058	17.1281	17.5234	17.3921	17.447	17.4568	17.1448
WDR1	Q2KJH4;F1MTP5	22	19.9292	19.5303	19.7471	19.9121	19.9564	19.7163	19.8082
ANO9	A0AAA9RY92	10	18.1629	18.1604	18.1807	18.1007	18.151	18.128	17.6797
NT5C3B	F1MLB9	8	16.7295	16.418	16.5622	16.9933	16.5548	16.5286	16.5915
PREB	A0AAA9RV38	10	17.305	17.2275	17.3288	17.4477	17.3193	17.5357	17.2516
CCT8	Q3ZCI9;G3X861	41	20.7117	20.5615	20.5471	21.1008	20.8714	20.675	20.883
KIF15	E1BC41	32	15.5311	15.1406	15.2271	15.6144	15.4715	15.3069	15.5214
FAM111B	E1BGY1	11	15.0013	15.1985	14.8904	15.755	15.2495	15.1647	14.8411
SKIC2	A0AAA9SE27	25	17.5157	17.5949	17.7499	17.5956	17.5437	17.5547	17.8165
GCLM	Q2T9Y6	9	17.0002	16.6798	16.6083	17.4754	17.1111	16.7642	16.9118
PALS1	E1BIQ8	17	20.0671	19.6458	19.5322	20.3227	20.241	20.0837	20.4552
AP1M1	Q2KJ81	7	15.9965	15.8005	16.1142	15.9647	15.7824	15.8584	16.3916
AP1M2	A0A3Q1LWL6;Q3SYW1	16	18.6906	18.5845	18.6988	18.5385	18.5534	18.5006	18.1007
FAM169A	F1N5F9	15	16.9684	17.131	17.4182	16.6908	16.8645	16.8056	16.6778
TNPO1	Q3SYU7	23	18.8609	18.8908	18.8769	19.0496	18.9753	18.8775	19.1461
ATP13A3	E1BG26	7	15.1981	14.9122	14.7349	14.992	15.1452	14.9235	15.282
ATP5F1B	A0A452DII8;P00829	26	22.666	22.874	22.7276	22.4378	22.5739	22.7312	22.5248
HDHD3	Q5E9D6;A0A452DHL8	9	16.3957	16.368	16.4347	16.1105	16.2936	16.4082	16.141
COL4A1	Q7SIB2	5	19.9654	20.1696	19.7675	18.8507	19.126	19.9618	22.2311
ZNHIT2	Q2TBW5	3	15.4978	15.3479	15.4637	14.9507	15.5157	15.0681	15.4467
ITGA5	Q27977	15	18.26	18.4798	18.1582	18.0043	18.0705	18.6566	20.2282
AKAP13	A0A3Q1MRE3	35	17.4475	17.28	17.67	17.3177	17.5968	17.3207	17.2854
PCYT2	A0A3Q1MLB5;Q5EA75	14	17.2878	16.7519	16.7561	17.4161	17.3648	17.1235	17.0955
CLTC	P49951;A0AAA9SF14	80	22.3501	22.3934	22.5744	22.0512	22.1551	22.2467	22.0905
MOV10	Q0V8H6;A0AAF6YZT3	47	18.7209	18.9401	18.7827	18.5414	18.7042	18.6633	19.0046
SPINDOC	E1BD11	3	14.9245	14.6581	15.2012	15.8471	15.7768	15.7215	15.2627
MEN1	A0AAF6YJE9;Q0P5I0	6	15.065	15.0725	15.0244	14.8277	14.7672	15.0726	15.0622
ADSS2	A7MBG0	14	17.7298	17.6349	17.4935	18.3035	18.1485	17.6372	17.8671
SRP68	F6RAC6	32	18.7088	18.7077	18.7448	18.7116	18.7282	18.6294	18.8238
KNOP1	A0A452DJ63;A5D7J3	11	17.2703	17.2564	17.2471	17.3317	17.2354	17.4991	17.7081
VPS39	A0AAA9TAD1	25	16.0584	16.1657	16.1793	16.0992	16.0189	15.9636	15.7637
CYB561D2	Q5E965	2	16.6954	16.6244	16.6843	16.5129	16.6407	16.8341	16.5956
TDP1	A0AAA9T3H0	8	14.9291	14.8606	15.2092	15.1644	15.1808	15.1405	15.1459
VTI1A	A0AAA9S2Q2	3	16.1242	16.1611	16.3113	16.2138	16.2994	16.6448	16.1804
RPL3	A0AAF6YKW6;P39872	12	21.9147	21.8391	21.8515	22.0153	21.939	21.88	21.8422
SPICE1	Q2T9X8;F1MIU6	4	14.0566	14.6613	14.5771	15.2755	14.9847	15.0909	14.7929
SIPA1L1	A0A3Q1M3G5	27	16.9714	16.7501	17.1538	16.4078	16.4101	17.0009	17.1747
PABPC4	F6RN21	17	20.4425	20.3707	20.4431	20.6186	20.5021	20.3611	20.2807
ANXA11	A0AAA9SWE4;P27214;A0AAA9U0R7	18	19.8224	20.4164	20.1287	19.0261	19.2515	19.6407	20.0632
GMPPA	A0A3Q1LUY6	14	18.3526	18.0173	18.1238	18.433	18.5582	18.2047	17.7993
CHMP3	Q58CS7	4	16.4103	16.6525	16.5484	16.8616	16.6822	16.559	17.1214
PRSS12	A0A3Q1M9L2	22	16.971	16.8968	16.8148	16.1861	16.5611	17.0071	17.0838
SIPA1L3	A0A3Q1MMG4	10	14.5013	14.6284	14.45	14.009	14.3335	14.6023	14.0554
COL4A2	F1N7Q7;Q7SIB3	8	18.9768	19.4284	18.9157	17.9122	18.3122	18.9383	21.2669
URB2	F1MJR1	29	15.7253	15.9273	15.7824	15.9661	15.8407	15.8837	15.7917
UBALD1	A0AAF6DLT8	2	14.4158	14.023	14.3778	14.9598	15.0783	14.6012	13.9546
BAHD1	F1MSG4	8	14.9063	14.6261	14.7072	14.3626	14.6434	15.0625	14.2205
A4GALT	A0AAA9TNA8	5	15.2883	14.7629	14.992	15.0452	15.0063	15.1667	15.4533
LOC522479	A0A3Q1LTS9	7	16.1046	13.5904	NA	14.5845	15.9611	13.7426	NA
GPX1	P00435	10	16.5814	15.9868	15.9726	17.2835	17.2533	16.6502	16.6235
DAXX	F1MGU0	5	14.6484	14.8319	14.8152	14.8348	14.7009	14.7347	14.8701
TPX2	A6H6Z7;A0A3Q1MAL7	16	15.601	15.7263	15.6576	16.3097	15.9267	15.9332	16.1634
FAF2	Q2HJD0	13	17.6766	17.7288	17.8553	17.6586	17.6165	17.8374	17.5023
LAMA5	A0A3Q1MA79	94	17.4703	17.7264	17.3713	16.8036	17.139	17.6572	19.6103
TBC1D25	E1BHZ5	6	16.1826	15.8213	16.0921	16.4406	16.4931	16.4319	16.1009
PPP6C	Q2KIC7	9	16.5315	16.7831	16.8283	16.7501	16.6664	16.4041	16.7379
PPP4C	A6H772	8	17.7077	17.1315	17.4868	17.6508	17.492	17.403	17.2954
SIKE1	Q0VCF3;A0AAA9RW05	9	14.551	14.567	14.8759	14.7807	14.7709	14.6666	14.3658
BSPRY	F1MKU3	16	17.7192	17.871	18.0666	17.3989	17.5692	17.5641	17.1123
ZCCHC8	F1MM78	18	18.7183	18.5987	18.7705	18.4966	18.5711	18.6456	18.6387
PROS1	A0AAF6ZAV2;P07224	11	16.199	17.141	17.0881	14.8242	15.4476	14.9147	16.9364
PI4KA	A0A140T888;O02811	35	15.7738	16.1014	16.057	15.7923	15.871	15.7345	16.2369
DENND4C	F1N032	28	17.3983	17.2761	17.4526	17.3133	17.3898	17.3529	18.1321
WDR77	Q5E9I7	11	17.1007	16.7291	16.7714	17.4238	17.1849	17.0212	17.2788
STIM1	A0AAA9SQQ0;Q58CP9	13	15.6872	16.041	15.8804	15.6078	15.6365	16.0198	17.331
COPS2	G3X736	19	18.1982	17.9689	18.1028	18.3903	18.2745	17.9325	18.261
PTPRF	A7MBJ4	16	17.9116	17.7432	17.5371	17.8703	17.694	17.7993	17.2666
RNF213	A0A3Q1LV49	51	17.6629	17.5545	17.5049	17.2014	17.5604	17.8631	18.9639
GGACT	A0AAF7A0Y9;Q0VFX9	6	15.4078	15.3606	15.1856	15.149	15.2123	14.8916	15.2721
POLD2	P49004;A0A3Q1N4D8	13	16.5932	16.6774	16.5723	16.8768	16.8201	16.5956	16.9406
DOCK8	E1BNA6	17	15.6434	15.9443	15.9337	14.5335	15.2816	15.4181	15.0304
FARS2	Q08D87	11	15.0167	15.1473	14.7761	14.9131	15.0902	14.9561	14.8947
SEC23IP	E1BKW5	21	18.9215	18.8153	18.964	18.9731	18.982	18.9029	19.1605
CAD	F1MVC0	61	18.0641	17.8972	17.9607	18.5725	18.3714	18.1594	18.5838
MT-ND4	P03910	4	16.8519	16.4063	16.7414	16.6216	16.7336	16.8887	16.5023
SMCHD1	F6RF21	63	18.3117	18.5039	18.5193	18.0362	18.2178	18.3475	18.7282
CAPG	Q865V6	14	22.6979	22.642	22.7359	22.6363	22.5361	22.3914	21.9452
RAD21	Q3SWX9	16	16.5717	16.6004	16.7635	16.4482	16.4211	16.633	16.7605
HOMER3	A0AAA9THN5	8	14.837	15.1779	15.7436	12.4722	12.7777	13.6296	14.17
PRDX2	Q9BGI3;A0AAA9RUA3	10	20.5097	20.4019	20.5387	20.4782	20.4155	20.3032	20.7956
VCP	G3X757;Q3ZBT1	49	21.4564	21.4872	21.4517	21.52	21.4614	21.3323	21.3595
CTNNA1	Q3MHM6;A0A3Q1M9M0	36	19.7815	19.892	20.0744	19.377	19.6045	19.7995	19.5387
NATD1	A6QL79	2	14.9661	15.1422	15.1033	14.5342	14.4828	14.3803	14.0959
NSA2	Q3SX11	8	16.3833	16.6004	16.4718	16.9463	16.7535	16.7142	16.535
VEZT	F1MQ09	9	14.0965	13.7445	13.9639	13.5873	13.5074	14.1786	14.0034
NCBP2AS2	A0A3Q1NMJ3	3	16.4952	16.2553	16.8249	16.2927	16.3086	16.3292	16.278
GSS	Q5EAC2;A0A140T850	15	19.5989	19.3117	19.3589	18.7713	18.7218	18.8205	18.364
EML3	F6RJ80	9	15.2624	15.0977	15.2805	15.0312	15.2687	15.1399	14.9574
DALRD3	E1BGI8	3	14.4802	13.7543	14.049	14.5051	14.2453	13.7359	14.637
BPNT1	Q3ZCK3;A0A3Q1MCU7	13	17.5845	17.6044	17.5051	17.7833	17.7737	17.4027	17.621
SUPT6H	A0A3Q1LVF3	46	18.2273	18.144	18.2515	18.2882	18.2369	18.1363	18.3458
LARP4B	A0A3Q1LR80	15	16.1847	16.3073	16.7435	16.2901	16.1878	16.3185	16.4975
NR2F6	F1N3S3	6	14.8191	14.7841	14.9846	15.2505	15.1547	15.0667	14.8824
PDSS1	A0AAA9TV23	5	14.199	13.6877	13.5148	14.5784	13.8347	14.2817	13.8616
AGO1	A0A3Q1MEG1	12	16.8775	16.837	17.0065	16.2028	16.4025	16.5226	16.7449
AGO2	Q6QME8;A0AAA9S2J2	20	16.8259	16.7863	16.9405	16.547	16.7118	16.8302	17.3052
NID2	F1MF97	49	19.7806	20.1014	19.8498	18.6522	19.1489	19.8737	22.0304
PFKM	Q0IIG5	13	16.4047	16.353	16.4091	16.1962	16.1754	16.4336	18.5078
POLR2M	Q17QE3	5	16.4909	16.1905	16.3909	16.5327	16.3155	16.071	16.1611
SGTA	Q32LM2	11	18.0842	17.9205	17.9563	18.2259	18.3274	17.9703	18.1666
STAG2	G3X6R3	23	15.5971	16.0663	15.9439	15.511	15.5306	15.5431	16.1046
GCNT3	Q7YQE1	15	17.5172	17.7778	17.6945	17.4817	17.2636	17.7381	16.9903
PSMC1	A4FUZ3	23	18.9411	18.8192	18.8215	19.1523	18.9109	18.7938	18.8351
ANKFY1	F1MD79	15	17.2593	17.1202	16.8047	17.4061	17.3977	16.9439	17.6513
WNT4	A0A3Q1MJR6	4	14.5607	15.0075	15.267	13.4616	14.5971	15.0209	15.479
GALNS	A0AAA9U1E9	13	19.0405	18.6229	19.0687	17.9542	18.0531	18.6568	17.9386
ST13	A7E3S8;A0A3Q1M4L0;A0AAA9TBE2	9	20.8193	20.6638	20.8391	20.7409	20.8806	20.7265	21.1584
STRBP	Q08E27;A0AAF7AND0	17	18.9459	19.2085	19.3386	18.9948	19.0341	19.2449	19.1695
SNX8	Q2KHV6	17	16.9501	16.471	16.584	17.3658	17.1952	16.6506	16.2867
DIAPH3	E1BMN2	4	14.697	14.1369	14.2142	14.9191	14.9278	14.6091	14.6816
ADAM10	Q10741	20	17.8477	17.8146	17.7487	17.9225	17.8686	18.0615	18.52
EFR3A	A0AAA9T2Q2	14	14.7872	14.7478	14.833	14.8871	14.8897	14.9798	15.3216
VPS50	A0A3Q1MPN8	18	17.5048	17.4243	17.4794	17.6063	17.5235	17.4845	17.3942
SYNCRIP	F1MCT8	20	19.708	19.8886	19.9323	19.6757	19.6355	19.716	19.8406
DHCR7	Q5E9J5	6	18.9263	18.7111	18.7786	18.0847	18.4087	18.973	18.6438
SAFB	A0AAA9TEU1;A0AAF6DM79	20	19.0757	19.3709	19.5067	19.1571	19.2753	19.3982	19.4693
SMARCA2	A5PKK5	7	14.4201	14.4627	14.2759	13.8022	14.0535	14.42	15.5367
DIS3	F1N1R4	26	17.3746	17.6699	17.5444	17.4541	17.3418	17.49	17.5669
SMARCA4	A0AAA9TIX2;A7Z019	19	17.3474	17.2746	17.4248	17.1637	17.2139	17.2602	17.2653
FANCD2	E1BE83	17	15.7328	15.679	15.549	16.1484	15.9249	15.9216	15.9226
LARP7	A0A3Q1LP50	25	17.0256	17.0933	17.1235	16.8543	16.9126	17.0698	17.1958
RMDN2	Q2TBQ7	7	15.0556	14.8674	15.4022	15.0411	15.1223	15.3759	14.7432
UAP1	F1MJP7	15	19.3692	18.9886	19.1734	19.6684	19.6466	19.3809	19.2576
CLCN2	A0AAA9RVB8	12	16.53	16.647	16.7136	16.0603	16.1802	16.5475	16.7108
WASHC4	A0A3Q1MJ20	25	16.6902	16.6931	16.6718	16.7197	16.6236	16.3985	16.4594
FGFR1OP2	E1BBF9	6	14.8485	14.9066	15.336	15.1064	15.2007	15.2802	14.9013
GIPC1	E1BJQ7	11	16.9787	16.8593	17.0168	17.0584	17.1005	17.239	17.1156
NMT1	F1MZK0;P31717	10	17.7385	17.8817	17.9364	17.8544	17.7837	17.7304	18.1755
SRP72	E1BB38	29	19.7707	19.8897	19.8215	19.8715	19.8399	19.7136	19.714
NGRN	Q2HJC0;A0AAF6Z046	3	15.9042	15.5937	15.6665	16.3881	15.985	16.1359	15.7759
SMAD2	Q1W668;E1BE92	3	16.6196	16.5288	16.6637	16.2687	16.2565	16.4553	16.8745
STX4	A0A452DIB2;Q3SWZ3	9	15.8834	15.5685	15.8056	15.878	15.9155	16.0345	16.2251
AP1S1	Q1JQ98	5	18.471	18.4035	18.6039	18.3154	18.445	18.1835	18.0147
VPS16	F1MQ47;Q5E9L7	21	18.2072	18.0572	18.2075	18.2807	18.1545	18.1395	18.0428
NRDE2	A0A3Q1NNB2	11	14.7921	14.6724	14.9522	14.9599	14.9695	15.0431	14.8756
NIT1	Q32LH4;A0AAA9RRT9	3	19.7425	19.473	19.6383	19.4644	19.2529	19.5139	20.079
GTF3C3	A0A3Q1M0Z5	9	14.4871	14.6502	14.7702	14.488	14.5796	14.2875	14.6653
GNPTG	Q58CS8;A0AAA9S597	5	15.377	14.8807	14.7997	15.2751	15.491	15.148	15.0706
UTP6	F6R8I1	19	16.6573	16.6325	16.6471	16.8836	16.8805	16.974	16.8203
TOR1A	A5PK75	10	16.8998	17.1325	17.1745	16.394	16.379	16.8902	16.8236
TOR1B	F1MBM5	5	16.2468	16.5277	16.3728	16.2433	15.9998	16.2937	15.9492
CORO1C	A0AAA9SY31	18	20.4957	20.513	20.7032	20.0055	20.0885	20.2113	19.8258
LOC534913	A0AAA9SND9	7	15.9172	15.8052	16.0766	15.7734	15.8915	15.85	15.893
DHX30	F1N0J0;Q2NKY8	36	16.8779	16.9129	16.7421	16.6774	16.6927	16.756	16.781
KRT6A	P04260;F1MKE7	6	14.0716	15.7378	15.1198	14.1252	13.93	13.8815	14.9542
PCGF6	E1BJL2	3	14.0534	NA	13.3924	14.1397	13.4343	13.5095	NA
PPM1G	P79126	8	17.2528	17.0242	17.0086	17.4661	17.3292	17.0477	17.2763
YLPM1	E1BGC5	28	16.0522	16.0738	16.3045	16.407	16.2229	16.362	16.4838
PGM1	Q08DP0;F1MJS4	18	17.1154	17.2842	17.2591	16.9354	17.362	16.9795	17.1567
APPBP2	E1B7N1	4	13.4181	13.0364	13.4264	13.9812	13.5881	13.4023	13.1907
TNKS1BP1	A0A3Q1N4H7	44	18.2979	18.1619	18.3386	17.6144	17.9389	18.09	18.3286
SLC25A46	A0A3Q1MHM6	3	14.9093	14.7389	14.6596	15.102	14.9047	15.1999	14.614
CDC16	A0AAA9TJI9	8	15.8038	15.6233	15.8278	15.9725	15.7176	15.8788	15.9481
MTREX	A0AAF6DLQ5	33	17.3112	17.3409	17.4555	17.3676	17.3443	17.3653	17.3219
INTS8	A5PJS8	9	16.6238	16.5754	16.7625	16.3931	16.5628	16.5414	16.5805
PSMA5	A0AAF6Z8I1;Q5E987	11	19.6743	19.8892	19.5456	19.7756	19.6877	19.3801	19.7822
TGM1	F1MBB7	30	19.7489	19.2776	19.0082	19.3393	18.9107	19.4957	21.3419
DNAJB12	F1MII1;Q58DR2	7	15.8993	15.7287	15.8165	16.0277	16.0844	16.0298	15.4405
NFS1	A0AAA9T7J9	10	15.5284	15.6576	15.5017	15.1693	15.4087	15.5593	15.0504
IPO5	F1MPE5	40	19.9654	19.8503	19.8265	20.2359	20.0966	19.9208	20.0563
PLPP1	A0AAA9STE8	2	12.717	NA	12.7836	13.6074	11.7042	12.786	13.5252
CD9	A0AAA9RTY1;P30932	3	18.4392	18.4019	18.0816	18.8015	18.7954	18.0737	18.4048
TNPO3	A5D7C4	27	17.2163	17.2651	17.2586	17.5677	17.4231	17.1989	17.368
DOCK5	A0A3Q1MC59	35	20.7558	20.9197	21.0212	20.1644	20.4415	20.4363	20.261
PEX1	A0AAA9S682	17	14.9521	15.0497	15.284	14.7692	15.0105	15.0089	14.6581
PSMB4	Q3T108	5	19.2259	19.1057	19.1888	19.4208	19.2619	19.1351	19.1093
MEMO1	Q2HJH7;A0AAA9SKU6	11	17.0833	16.8032	16.8904	17.1311	16.9576	16.8336	16.7105
XPO1	E1BE98	39	18.3485	18.3389	18.3954	18.5114	18.488	18.3201	18.4061
YTHDC2	F1MNU7	14	15.2252	15.2346	15.2204	15.1867	15.066	15.3386	14.8757
CHML	A0AAA9SJP0	7	16.4787	16.382	16.1819	16.478	16.1265	15.8809	15.9327
CPD	E1BLR9	26	17.4605	17.6641	17.4494	16.7342	17.0802	17.0551	16.8929
HNF4A	F6Q8S4	3	NA	13.9367	13.5696	13.3458	13.5021	13.6921	16.1748
FDFT1	Q32KR6;A0AAA9TVZ3	19	18.4445	18.3911	18.1496	17.2748	17.9088	18.5213	17.8751
RPS7	A6H769	9	21.7149	21.0035	21.3454	21.7655	21.4564	21.2804	21.0955
RXRB	A0AAF6DMC7	2	15.8284	16.1739	15.7594	NA	15.1043	14.8208	15.5352
ARMH3	F1MSE5	13	17.9724	17.8123	17.9208	17.8717	17.7942	17.6953	17.6265
GAK	F1MIB2	28	17.7825	17.6587	17.7499	17.7311	17.6208	17.5695	17.4971
SPG11	F1MEB4	28	15.9321	15.9592	16.0931	15.903	16.0447	15.7408	15.7211
EIF5B	F1N6Y7	29	19.2416	19.2671	19.438	19.1362	19.0534	19.0958	19.022
CLTA	P04973	6	20.0975	20.2151	20.2928	19.9726	20.0012	20.0543	19.7563
CCT7	Q2NKZ1	30	19.8894	19.6957	19.7599	20.2155	20.0257	19.8988	20.1131
OS9	Q3MHX6;F1MX65	13	16.7105	16.7373	16.4795	16.3848	16.4824	16.5737	16.4772
MCM3	A4FUD9;A0AAF6YVB0	36	18.7255	18.541	18.6775	18.7205	18.599	18.5623	18.7127
TBC1D10A	F1MB46	12	15.8538	15.8886	15.8528	15.7585	15.9251	15.7231	15.687
NSMCE1	Q3T0X7;A0A3Q1MQS1	4	14.7736	14.5988	14.694	15.0885	14.6662	14.7686	14.769
STRIP1	Q0P5J8;A0A3Q1MT54	10	15.8613	16.1614	16.309	15.9969	16.0359	16.1647	16.1707
MAD1L1	A0A3Q1MWV1	20	16.6161	16.8307	17.0859	16.3826	16.592	16.6956	16.895
HK2	A0A3Q1LZ02	28	18.1796	18.2611	18.0174	18.176	18.3114	18.0401	17.5553
ACTR8	A0A3Q1MDF9;Q1LZF2	8	15.938	16.0977	16.1339	15.7656	15.8058	15.837	15.7685
COPZ1	A0AAF6YNH6;P35604	6	18.4168	18.6864	18.4481	18.5241	18.6868	18.4933	18.8336
CYB5R1	Q3MHW9	8	16.4217	16.3707	16.7645	16.2729	16.401	16.5961	16.2001
BICD1	F1ML98	4	15.0802	14.9943	15.3396	14.6593	15.0331	15.0169	14.2907
TTC27	Q17QZ7;A0AAA9SPB9	21	15.9637	15.657	15.6589	16.4563	16.1229	15.7966	16.0222
LTA4H	Q3SZH7	24	17.5774	17.4066	17.2693	17.746	17.9008	17.3742	17.141
PUS7	F1ML88;Q08DI8	15	16.0222	15.4581	15.6016	16.3663	16.0454	15.9124	16.0273
HK1	A0A3S5ZPF0;P27595	25	18.3975	18.7673	18.5827	17.7931	18.2122	18.2898	18.2246
SMC5	F1MPW4	12	14.8049	15.0066	14.9788	14.6833	14.9031	14.796	15.0249
CKAP2	A0A3Q1M6K8;A5D7U0	10	15.6018	15.6118	15.6509	15.9841	15.8321	15.9	16.3757
GSTA3	Q1JQ90	4	14.0893	NA	14.4335	14.9702	13.9806	NA	16.3035
ARL1	Q2YDM1	9	19.0787	19.4442	19.1815	19.2896	19.1833	19.0861	18.9555
A2M	Q7SIH1	25	15.9949	14.5884	14.3204	14.2766	14.7953	12.8146	16.6684
DOP1A	F1MPE2	6	14.9542	14.7013	14.8493	14.7106	14.6386	14.1814	14.8619
ADAR	F1MUM9	18	15.8611	15.9548	16.1153	15.9321	16.0112	15.9834	16.6796
SMS	Q3SZA5	16	17.0088	16.8954	16.8929	16.6378	16.6771	16.6583	17.2343
CYB5R3	P07514;A0A3Q1LZ18	16	20.296	20.4953	20.4006	19.6359	19.8099	20.1113	20.2594
NPL	Q29RY9	2	14.3626	NA	14.2801	14.9644	14.5938	13.7686	NA
NR6A1	F1MXG9	13	15.7674	16.1628	16.0551	15.3756	15.6443	15.8424	15.7756
FXR1	A0A3Q1M5A0;Q2TBT7	22	18.195	18.2631	18.2175	18.5678	18.4128	18.3668	18.5155
PCK1	Q8HYZ4;F1N1Z7	12	14.2931	14.3356	14.5572	14.2745	14.4474	15.2366	16.3739
PSMA6	Q2YDE4;A0AAA9S278	14	19.9431	19.7909	19.8746	19.8902	19.8455	19.72	19.708
KHSRP	A0A3Q1NE05	23	19.8389	19.8541	20.0296	19.772	19.7063	19.7545	19.8007
MIS18BP1	A0AAA9T6H1	8	15.4487	15.1419	15.4104	15.7467	15.6995	15.7354	15.7636
UBAP2L	A0AAA9TFY7	15	17.3817	17.3992	17.4778	18.1415	18.0248	18.0136	18.0393
INHCA	A0A3Q1MUV9	13	16.5774	15.8147	15.5874	15.6561	16.2984	15.2246	14.8819
ZFAND6	Q3SZY7	6	15.0721	14.9588	15.0537	15.0527	14.9847	14.8739	14.7673
PDIA5	A0AAA9RXH7;Q2KIL5	24	17.4891	17.76	17.6973	16.8841	17.3617	17.6177	17.9701
EDF1	Q3T0V7	3	17.9086	18.0308	18.1331	18.2539	18.1905	18.2648	18.0155
MERTK	F1N381	5	15.6369	15.8106	15.5843	15.7872	15.6878	15.3502	15.8614
DGKZ	A0AAA9SCA8	11	15.3471	15.3263	15.5199	15.369	15.2609	15.1515	14.8997
VPS51	A6QQ47;F1MJ84	18	17.2288	17.1075	17.1957	17.0996	16.9943	16.8851	17.1262
FAM3C	A5PKI3	8	17.5101	17.5234	17.4245	17.3845	17.328	17.5536	17.4764
TOLLIP	Q2LGB5;A0AAF6YRW2	8	17.201	17.7478	17.8198	17.0375	17.1782	17.1815	17.207
C19H17orf75	E1BCP5	6	15.3061	15.6503	15.8756	15.562	15.5134	15.66	16.0821
GNPAT	A4IF87;A0A3Q1LQH8	19	16.3709	16.3103	16.425	15.802	16.0114	16.2497	15.7658
CCNB2	O77689;A0A140T859;A0A3Q1MR83	6	15.1663	15.2691	15.2028	15.6492	15.1289	15.196	16.0852
TTK	E1BPP1	8	14.5048	14.6994	14.7551	15.3714	15.1343	15.2055	14.9393
MAP3K11	F1MC61	5	15.9313	16.1891	16.3154	15.8307	15.4638	16.1826	16.1982
PSMD3	Q2KJ46	30	18.6143	18.3596	18.4053	18.6923	18.5621	18.4205	18.3185
TTC1	Q3ZBR5	11	17.1419	17.0145	16.9216	17.6464	17.4475	17.0523	17.1337
RALGPS2	E1BNN3	9	14.7485	14.6845	14.4362	14.5888	14.5047	14.6678	15.8405
EP400	A0AAA9U053	12	15.9379	15.9697	16.1467	15.7832	15.8331	16.0206	16.1859
EZH2	A0AAA9THU3	14	15.4208	15.4039	15.571	15.3532	15.5476	15.3521	15.2317
DCUN1D3	Q5E9V1	2	13.7465	13.2021	13.5609	13.8468	13.6044	13.5811	13.116
MTA1	A0A3Q1MK17	8	16.8039	16.9537	16.6389	16.7065	16.7085	16.5077	17.4054
PHYH	A0AAF6YRS4;O18778	8	16.1011	16.1016	16.171	15.5273	15.73	15.9325	16.5387
WFS1	G3N348	3	16.9449	17.3128	16.7506	NA	15.7848	NA	17.1006
WDR24	F1MJS7	7	14.4385	14.2032	14.3707	14.2019	14.5574	14.0933	14.5244
ZC3H14	Q3ZC82	22	17.3677	17.2377	17.4544	17.6035	17.7624	17.5045	17.5195
ZNF259	Q2TBX0	15	17.0747	16.6989	16.8692	17.4692	17.131	17.0344	17.0272
PPP2R1A	F6QI68;Q32PI5	17	19.6403	19.7566	19.686	19.7189	19.7498	19.563	19.799
MYO5A	A0A3Q1LUB6	28	16.191	16.5235	16.4225	15.8072	15.9342	16.1921	16.4568
ARFGAP2	A1L520;A0AAA9SHG7	15	16.5206	16.6486	16.6814	16.8804	16.9845	16.712	16.9373
POLR3A	A4IF62	17	15.7492	15.7329	15.7658	16.0025	15.8051	15.5337	15.895
PDCL3	A0AAA9T5C0;Q0VCW8	7	18.0664	17.5929	17.7218	18.2058	18.0407	17.7302	17.9033
ZYX	F6PUM3	17	18.1245	18.1504	18.1451	18.0331	18.0705	18.0094	18.621
TBRG4	Q3SZK4;A0AAA9S1P7	16	18.8548	18.8935	18.7881	18.8588	18.8452	18.9259	18.8072
YTHDF3	A0A3Q1LJ04	10	17.1126	17.0775	17.3731	17.269	17.3387	17.4755	17.3114
RABGEF1	G3X6D4;O18973	8	15.5425	15.7403	15.4354	15.6166	15.6168	15.477	15.8466
PWWP2B	F6QPT2	2	12.8956	13.2902	13.3027	NA	12.2845	14.0108	NA
RFC4	A0A3Q1M190	16	16.3284	16.4213	16.3424	16.4271	16.41	16.5138	16.708
RPL24	Q862I1;A0AAA9TQX1	6	21.112	21.0155	21.1582	21.4904	21.3021	21.2765	21.0856
HNRNPL	E1BIB4	18	19.7755	20.0133	20.1301	19.6944	19.7177	19.9668	19.9569
PCBP2	F6RMB4	8	21.3878	21.3774	21.5431	21.5661	21.484	21.4378	21.5435
PCBP1	Q5E9A3	10	21.711	21.9439	21.8183	21.9907	21.8666	21.5777	21.8646
DPYSL3	A7MBI5	4	14.6482	14.5407	NA	14.6796	14.8526	13.7967	14.7491
GAPDH	P10096;A0A3Q1LPH5	11	24.0485	23.868	23.7495	23.7893	23.8175	23.6555	23.9499
CDCA2	Q29RT4;F1MG31	10	14.9494	14.9361	15.0122	15.539	15.2836	15.4608	15.4214
PAN2	E1BML0	8	15.8559	16.1182	15.9427	15.7091	15.8319	15.6314	16.068
CRYBG2	A0A3Q1MVS6	13	15.0918	14.8199	14.7359	15.4468	15.2924	14.9724	14.0808
TSNAX	G3MY03	9	16.266	15.7003	15.9597	16.4235	16.388	16.0972	15.7458
MRPS9	A0AAA9TAD0;Q58DQ5	16	17.476	17.4162	17.4812	17.4578	17.5452	17.671	17.2262
TMEM70	A6H773;A0A452DJC9	5	16.3661	16.7178	16.3255	16.3496	16.4873	16.594	16.3314
BIN2	A4FUG5	17	17.2876	16.9849	17.2288	17.4621	17.2822	17.0993	16.3583
COPG2	A2VE21	18	17.6456	17.6805	17.6968	17.7382	17.5996	17.6329	17.5019
ADGRL2	O97817;A0A3Q1MQ77	19	15.693	15.8466	15.9043	15.1993	15.4459	15.5937	15.7755
CHAF1B	A5D9H4	10	19.3567	19.4109	19.4661	19.5867	19.3822	19.2639	19.522
POLR2G	Q5E9B8;A0AAF6YTR5	6	16.2661	16.159	16.1889	16.5757	16.3533	16.3758	16.1706
RPP25	A0AAA9U238	4	14.8568	15.6131	15.6464	13.6193	14.667	14.7102	14.4277
SRPRB	F1MLG1	14	19.7677	19.8944	19.7718	19.9203	19.7859	19.9389	19.7418
RXRA	A0AAA9T9C1	7	17.1773	17.2768	17.203	16.4783	16.8127	16.8839	16.3476
NR2F2	Q9TTR7	2	15.0047	14.7507	15.1885	14.0966	14.1494	14.5593	14.0449
OIP5	E1BAL2	2	14.6476	13.5157	NA	14.9101	14.665	14.7537	14.5386
PECR	A0AAA9TYP4	4	14.7428	15.2016	15.2492	15.2011	15.0774	15.2716	14.4563
PAFAH1B3	A0AAF7ABT5;Q29460	9	19.3725	19.7249	19.6023	19.1649	19.3971	19.288	19.5058
YEATS2	A0AAA9SZB7	9	14.2226	14.4862	14.6315	14.5279	14.6656	14.7641	15.0405
IPO9	G5E567	17	17.1767	17.1699	17.0596	16.9632	17.0674	17.0241	17.0513
SOD2	P41976;E1BHL1	6	18.1842	18.1655	18.2892	18.3708	18.3617	18.4161	18.3292
PSMD12	A0AAF6YJJ1;Q2KJ25	21	18.4763	18.3336	18.3843	18.5875	18.5205	18.3863	18.3059
MPHOSPH6	A0AAA9S999	3	16.2001	15.9845	16.0459	16.1679	16.1201	16.2827	16.1803
CRNKL1	F1MZT2	18	16.1733	16.3625	16.302	16.2768	16.212	16.3539	16.1964
GFM1	A0AAA9TGR1	23	17.4124	17.3913	17.3853	17.4855	17.6123	17.5676	17.4536
RFC3	Q2TBV1	17	16.1636	16.1129	16.3521	16.325	16.436	16.3791	16.6633
ATP6V0A1	Q29466;F1MJV0	15	20.4368	20.4107	20.2331	19.7606	19.8493	20.0378	20.5921
GCNT1	F1MUW5;Q92180	12	15.861	15.8163	15.8198	16.0022	15.8275	16.1476	16.3031
FNBP1L	A0A3Q1MAC0	15	17.6821	17.5733	17.834	17.5884	17.5142	17.5896	17.4126
PSMB5	Q32KL2	13	19.5305	19.9015	19.4939	19.5905	19.4862	19.2344	19.3429
GRB2	F6RGB4	11	17.3231	17.0728	17.3104	17.1911	17.152	17.0742	17.0233
CPSF2	A0AAF6YUI9;Q10568	26	17.2941	17.3133	17.4973	17.3773	17.1534	17.1044	17.3906
RIOX1	A5PK74	14	16.8387	16.985	17.0733	16.6662	16.7808	16.846	17.3251
RASAL2	A0A3Q1M8V3	11	14.6699	14.9162	14.8888	14.6299	14.7606	14.7475	15.0617
PHB2	Q2HJ97	15	20.6849	20.5844	20.4186	20.931	20.8043	20.8262	20.3951
ADA	A0A3Q1M5V8;P56658	18	20.999	22.0211	22.1257	19.3235	19.6008	19.6706	20.848
HMOX1	Q5E9F2	11	16.5969	17.0346	16.9533	16.6237	16.3267	16.4333	16.4045
GOLPH3L	A0AAA9SZV5;A6H7F6	7	15.6188	15.6483	15.8073	15.7148	15.8737	15.7369	15.4621
ZMPSTE24	E1BMF2	11	16.5283	16.027	16.6414	16.6121	16.6551	16.7368	16.4694
HMBS	Q2KIN5	7	16.1859	15.9599	15.7719	16.3418	16.067	15.863	16.2394
FERMT2	A7MB21	30	18.3297	17.9874	17.9849	18.6197	18.506	18.118	18.3721
MPDZ	A0A3Q1LKW6	5	12.3785	12.7582	12.7944	13.1034	12.139	12.9668	15.0712
RPL13	Q56JZ1;A0AAA9SP49;A0A3Q1M4M0;F1MK30	11	21.8689	21.9701	21.9448	22.1871	22.0026	21.9404	21.8642
MRPS27	Q32PI8;A0AAA9S006	15	17.5417	17.4423	17.5209	17.6842	17.6884	17.6945	17.3556
TXNDC16	E1BAG3	16	16.3461	16.1553	15.9508	17.0259	16.6151	16.3601	15.7883
TSR1	F1MSR6	24	17.2918	17.0475	16.9649	17.8775	17.5084	17.3495	17.2735
WARS2	Q3T099;A0AAA9RYF4	9	17.8483	17.9105	17.7404	17.8262	17.7958	17.9366	17.664
EIF3C	Q3SYW6	28	19.456	19.3838	19.3604	19.7079	19.5695	19.5268	19.4412
RAB6A	A0A3Q1MBS7	8	18.8179	19.3368	18.9771	18.5473	18.6629	18.9114	19.178
RAB6B	A0A452DHU1;A6QR46	5	18.1052	18.3404	18.3563	16.9378	17.5642	17.9068	17.2483
DAAM1	A0A3Q1LHF1	8	15.0955	15.4146	15.4685	15.457	15.586	15.2283	16.6423
MFAP1	Q5EA98	8	17.126	17.0474	17.2694	17.3547	17.2487	17.3799	17.4892
ATP5IF1	P01096	2	18.4382	18.482	18.4654	18.1597	18.1069	18.6105	17.9516
SLMAP	A0A3Q1LZA0	27	17.2595	17.3288	17.428	17.2661	17.314	17.4171	16.773
SORD	A0A3Q1M465;Q58D31	14	19.0452	18.341	18.7989	19.6731	19.6151	19.1598	18.0157
CHAF1A	A6QLA6;A0AAA9SXY1	16	16.8093	16.8558	17.0142	17.201	17.2183	17.2788	17.0288
SLC7A4	E1BCI3	9	19.7541	19.0119	19.3761	20.3309	20.2346	19.7293	18.5608
RWDD1	Q3ZC53	4	16.0424	15.6928	15.763	16.2871	16.1192	16.0181	15.9427
PRUNE1	A0A3Q1LJH2;Q5E9Y6	9	16.2708	15.6621	15.9219	16.5718	16.377	16.0862	16.6717
HSPA5	Q0VCX2	35	22.3921	22.4683	22.3241	22.3573	22.4162	22.5272	22.4895
MSN	Q2HJ49	29	23.7735	23.7695	23.9252	23.5281	23.7474	23.6725	23.6992
NXF1	Q1RMS5	23	17.7101	17.5789	17.6953	17.5738	17.4608	17.6841	17.7227
CXADR	A0A3Q1MQS2;Q8WMV3	10	16.748	17.0585	17.0478	16.4873	16.6506	16.929	17.0861
CLIP2	A0A3Q1N033	12	17.7065	17.5183	17.8022	17.4685	17.8042	17.382	17.3082
AP2A2	A0A3Q1LIW3;Q0VCK5	26	18.3911	18.1575	18.4131	17.8506	18.0829	18.1365	17.9482
CCT3	Q3T0K2	35	20.3448	20.3293	20.2278	20.5991	20.4499	20.2247	20.5795
ACP1	A0AAF6Z8C2;P11064	6	18.3028	17.9096	17.9539	18.5053	18.2283	17.8923	17.8831
NFX1	A6QLA0;A0AAA9TJZ3	31	18.4122	18.3162	18.5531	18.5348	18.569	18.5455	18.0327
FCF1	Q32PD0	7	15.6194	15.5186	15.7002	15.8751	15.6608	15.6905	15.5936
SAE1	A2VE14	17	17.6996	17.5833	17.3446	17.9325	17.7539	17.4627	17.5937
DOCK7	F1N3L7	24	16.5477	16.6798	16.7169	16.3823	16.481	16.5775	17.1416
STN1	A0A3Q1LYR8;Q08DB2	7	15.1609	15.135	15.2163	15.101	15.5627	15.2538	15.2432
SEC24A	A6QNT8	27	17.5571	17.6371	17.5983	17.7126	17.5167	17.5277	17.8473
SEC24B	E1BPR4	18	17.8401	17.6371	17.6861	17.5879	17.7664	17.8523	17.7688
DLST	A0A3Q1MHE5;P11179	10	19.7375	19.8195	19.803	19.4813	19.6321	19.9529	19.3764
RSL1D1	A4FV97	18	19.0749	19.2798	19.2301	19.3002	19.165	19.3785	19.2454
CACTIN	F1MB35	5	14.1937	13.7691	14.3013	14.1374	14.0127	14.1923	14.0118
GFM2	A0AAF6ZIV2;A6QNM2	8	15.7705	15.7003	15.7026	15.8951	15.9629	16.0164	15.561
RPL29	Q58DW3	3	21.779	21.2857	21.5942	22.1121	22.3787	22.0848	21.9843
USP8	Q0IIM6	22	16.6384	16.7545	16.8765	17.0877	16.9993	16.7317	17.1662
GSE1	A0AAA9TBA2	3	13.6477	13.6105	14.0884	13.7165	13.4897	13.6627	13.2166
PEX19	Q3SZD1	11	16.7094	16.5411	16.5514	17.4883	17.5418	17.0777	17.0124
EGLN1	A0A3Q1M2B6	9	16.4012	16.2078	16.2998	16.2977	16.3358	15.8558	16.3125
APOA1	A0AAA9SEH0;P15497	25	19.3428	20.6299	19.1337	20.4059	21.0159	19.1896	20.9998
[truncated: 4,664 more rows]

## Sheet: volcano_result
Genes	Uniprot Accession	n_peptides	l2FC	p-value	Significant
IFNT3	P56831;A0A3Q1N661	4	not detected in Knockout
IFN-tau-c1	A0A3Q1ML43	3	not detected in Knockout
TCF20	A0AAA9TL18	6	-0.231762	0.306207	n.s.
C7H19orf67	A0A3Q1N125	2	0.0131581	0.950333	n.s.
TCOF1	E1BHU1	24	-0.21411	0.213256	n.s.
DDRGK1	Q1LZB0;A0AAA9SK08	6	0.0170722	0.885393	n.s.
RBM42	A0A3Q1M222;A0AAA9SKY8;Q0P5L0	5	0.194518	0.218561	n.s.
RREB1	E1BN44	16	0.158032	0.132246	n.s.
AP5B1	G3MZC5	12	0.167928	0.308576	n.s.
NCOA2	E1BPY4	12	0.156372	0.323611	n.s.
MYL3	P85100	8	-0.516065	0.285893	n.s.
MTHFD1	A4FUD0	38	-0.114352	0.412706	n.s.
PSMD4	Q58DA0;A0AAA9S3W4	12	0.00390005	0.981643	n.s.
SLC7A5	Q9TU26	5	-0.683966	0.266567	n.s.
MFSD10	Q0P5M9;A0AAA9SER4	5	0.0548518	0.884147	n.s.
GNG2	P63212	3	-0.975522	0.218566	n.s.
ZFPL1	Q2YDD3	5	0.123174	0.282631	n.s.
EDC4	E1BJH1	37	-0.0817316	0.279779	n.s.
GOLGB1	A0AAA9SMB5	113	-0.0839688	0.529506	n.s.
TPRN	G3MWU7	4	-0.107693	0.669879	n.s.
PFDN4	Q2TBR6	2	0.150983	0.318072	n.s.
APLP2	F1N226	15	-0.155262	0.834181	n.s.
TDP2	A7YWI9	4	-0.0595404	0.864971	n.s.
CDC27	A0A3Q1MS93;A7Z061	13	-0.099093	0.502753	n.s.
U2SURP	A0AAA9SW45	24	-0.0606235	0.580114	n.s.
ZSWIM8	A7E305;E1BCX3	18	0.104115	0.439033	n.s.
EXOSC10	E1BMZ5	29	-0.014084	0.847736	n.s.
FH	Q148D3	16	0.0694477	0.631958	n.s.
TLN1	A0AAA9RW41	99	0.142726	0.20028	n.s.
CBR4	A4IFA7	8	-0.0478272	0.874658	n.s.
EFHD2	A5D7A0	14	0.448861	0.325613	n.s.
UNC45A	A0AAA9T3T4	33	0.0188867	0.877302	n.s.
CANT1	A0AAA9S9V5	12	0.199642	0.306249	n.s.
ARID1A	A0A3Q1M2B9	30	-0.149496	0.254282	n.s.
GYS1	A0AAA9RZE5;A7MB78	6	0.110109	0.783523	n.s.
SEMA7A	A0AAA9SEK8	8	0.318416	0.334225	n.s.
TRAPPC11	A6QLC7;A0AAA9RYM0	19	0.0475895	0.56069	n.s.
TTC5	F6QA20;Q0P5H9	15	-0.0994704	0.275091	n.s.
STIP1	A0A3Q1MJH4;A0A3Q1LW78;Q3ZBZ8	31	0.0357583	0.834858	n.s.
TRABD	Q58DF3;A0A3Q1LNP3	9	0.0641339	0.567425	n.s.
UNC119B	E1BIZ3	6	-0.49003	0.149053	n.s.
RFC1	A0A3Q1N5S1	14	-0.322088	0.152808	n.s.
ANK3	A0AAA9RXF1	26	-0.515492	0.395257	n.s.
NUMA1	F1N7I5	86	0.0707186	0.738862	n.s.
BCAR1	A0A3Q1M7M1	3	-0.423379	0.191228	n.s.
KIFC1	A0AAA9SUF6	12	-0.175471	0.195893	n.s.
CTNND1	A0A3Q1M1Q5	38	0.0378764	0.876861	n.s.
GADD45GIP1	A1A4P4;A0A452DIN1	10	-0.0624283	0.627776	n.s.
RBM39	A0A3Q1LWZ4	15	0.101155	0.583945	n.s.
SEC16A	F1N6K7	33	-0.0892692	0.2748	n.s.
LAP3	P00727	28	0.141621	0.464838	n.s.
PEX6	E1B8F6	14	0.270979	0.173154	n.s.
MTMR14	A0AAA9T6E4	4	0.0809995	0.7435	n.s.
SPEN	F1MRK2	19	-0.0854853	0.504153	n.s.
COPB1	A0JN39	44	-0.0240312	0.735434	n.s.
NOL7	Q3SZ46	7	-0.17111	0.319057	n.s.
SEPTIN11	A2VE99;A0A3Q1MUN6	10	-0.352828	0.200337	n.s.
BTAF1	A0AAA9SDW9	32	0.0726612	0.268405	n.s.
PKP4	A0AAA9SJ44	26	0.0583868	0.734252	n.s.
TTC4	A0A3Q1MJG1;Q5EA11	11	-0.102114	0.518146	n.s.
TRIM71	A0A452DJ29;E1BJS7	22	-0.124123	0.221603	n.s.
NSUN5	A6QQR1	5	0.146883	0.449893	n.s.
RAB3GAP2	A0AAA9T768	20	0.120984	0.254931	n.s.
IRF2BP2	G3MXD0	6	0.132367	0.476816	n.s.
CAMSAP3	A0A3Q1LZB9	26	0.0440693	0.63528	n.s.
TEX30	Q3ZC52	3	-0.281707	0.168741	n.s.
PTPRK	A0AAA9THG9	22	0.220821	0.498239	n.s.
SYNE2	F1MF78	69	0.386703	0.285243	n.s.
MARCKSL1	Q0VBZ9;A0AAF6ZP66	2	0.400766	0.177348	n.s.
BAG3	F1MIU2	19	-0.746609	0.12412	n.s.
PPOX	P56602	11	-0.0796927	0.523115	n.s.
VIL1	Q3SZP7;Q5E9Z3	22	-1.21956	0.238246	n.s.
DHRS11	Q3ZBV9;A0A452DID6	11	0.110329	0.497991	n.s.
TTI2	F6RG44	4	0.156682	0.282711	n.s.
NDUFV2	P04394;A0AAA9SEY3;A0AAA9TZL3	10	0.00100025	0.994026	n.s.
INTS1	A0AAA9TV32	40	0.0169223	0.877645	n.s.
USP34	G3MYZ7	26	0.09005	0.203983	n.s.
PFKL	A1A4J1	26	0.175643	0.144668	n.s.
SLC15A4	A6QQL0	10	0.212698	0.116651	n.s.
FBLIM1	A0AAF6Z5Y5;Q1JQB5	14	-0.193521	0.0971109	n.s.
KIF20A	Q29RT6;A0AAA9RY60	21	-0.187899	0.297569	n.s.
DIP2B	F1MLE1	27	-0.0597059	0.443133	n.s.
MTHFD1L	A0AAF6ZL73;Q0VCR7	15	-0.565629	0.28955	n.s.
HDLBP	A0A3Q1NND0	57	-0.0951991	0.299243	n.s.
NEK7	A0AAA9SNU1	13	0.0178736	0.945058	n.s.
GLOD4	A0AAF6DM94	15	-0.108787	0.375431	n.s.
GYG2	A0AAA9T701	5	-0.151495	0.740876	n.s.
UBE3A	A4IFN7	24	-0.0595741	0.418466	n.s.
TPM3	Q5KR47	8	-0.0876996	0.711152	n.s.
PACSIN2	Q1RMR9	16	-0.0925159	0.493788	n.s.
SLC7A6OS	Q1JQE2	6	-0.0113695	0.960469	n.s.
DNMT3A	A0A3Q1LZH7	11	-0.0270916	0.901264	n.s.
VPS52	E1BDC9	12	0.0955545	0.107648	n.s.
PRKCD	F1MZX0	22	0.0429904	0.729221	n.s.
HDHD2	Q3ZCH9	9	-0.0573064	0.863535	n.s.
CSE1L	F1MWN1;A5D785	43	0.0454782	0.538323	n.s.
OTULIN	F6Q7W7	8	0.149566	0.283546	n.s.
MAGI3	E1BM96	8	0.119621	0.201961	n.s.
FASTKD2	F1N1T6	11	-0.00552114	0.961814	n.s.
TTR	O46375	2	-0.0228627	0.974987	n.s.
CDC73	E1BPQ8	22	-0.119472	0.18717	n.s.
DUSP3	A7YY43	2	-0.0778066	0.32777	n.s.
VDAC3	A0A452DIJ5;Q9MZ13;A0A3Q1M5Z1;A0A3Q1M0L2	12	0.118854	0.567626	n.s.
EIF2B5	E1BPB3	14	-0.0147448	0.916079	n.s.
PRPF3	F2Z4C4;Q2KIA6	22	-0.0689356	0.520359	n.s.
MIA3	Q0VC16;A0A3Q1M2R2	52	-0.0339046	0.7842	n.s.
CAND1	A7MBJ5	37	0.0720164	0.2812	n.s.
F5	F1N0I3;Q28107	25	0.0393023	0.916686	n.s.
ATP2C1	P57709	13	0.131772	0.652279	n.s.
TP53BP1	E1BDS6	24	-0.14632	0.28525	n.s.
S100A16	Q0VCM0	5	-0.696606	0.0622655	n.s.
RCN1	G3N2L2	16	-0.47445	0.504915	n.s.
SRPK2	A0A3Q1NBC4	8	0.394547	0.0539372	n.s.
AP2A1	A0A3Q1LVF9	32	-0.00397364	0.962907	n.s.
KTI12	Q148I5	8	-0.0935303	0.602022	n.s.
PPP1R12C	A0A3Q1LWP2	4	0.236572	0.170638	n.s.
YBX1	A0AAF6Z3R0;P67808	7	-0.10213	0.137487	n.s.
BOD1L1	A0AAA9T5M5;F1N2T2	22	-0.116815	0.166597	n.s.
TOE1	Q17QN2	14	0.0514321	0.436681	n.s.
ADIPOR1	Q3T0U4	3	0.000998815	0.996829	n.s.
AP3M1	F2Z4I2;Q24K11	11	0.187581	0.104375	n.s.
TMEM102	Q1LZD1	7	0.579489	0.0403326	n.s.
KIAA1671	E1BC55	18	-0.777726	0.127282	n.s.
PRKRA	Q2HJ92	5	-0.220051	0.564802	n.s.
NF2	A0AAA9SWX2	17	0.125105	0.176339	n.s.
ADK	A0AAA9TAD8	14	0.00484371	0.976934	n.s.
FBXO28	Q2NL16	4	-0.015599	0.890978	n.s.
DHX9	Q28141;A0AAF6Z733	51	0.0172561	0.920315	n.s.
EVPL	E1B9N6	27	-0.17504	0.205408	n.s.
PTMA	A0AAF6YK23;P01252	4	0.363939	0.0305501	n.s.
NCKAP1	F1MPZ9	37	0.0271401	0.839248	n.s.
LAMA1	F1MEG3	79	-0.687668	0.251923	n.s.
WDR70	A0A3Q1LXS9;Q32LB0	19	-0.0310607	0.653579	n.s.
IDUA	E1BDR2	11	0.506355	0.103847	n.s.
PCCA	A0A3Q1LYL5	28	-0.181703	0.44233	n.s.
CLASP1	E1BGU2	32	0.0127807	0.869573	n.s.
PTMS	A0A3Q1MEU1;P08814	3	-0.084421	0.802113	n.s.
NXT2	A6QNX3	2	-0.0523466	0.715906	n.s.
NXT1	Q2KIW0;F1MNL5	2	0.285131	0.714839	n.s.
ZWILCH	A6QM04;A0AAF6YNA5;A0A3Q1LMY8	17	-0.0184158	0.849941	n.s.
LIN28A	E1BHM3;A0A3Q1N5H9	7	-0.739622	0.181811	n.s.
HNRNPUL2	E1BNQ9	28	0.0980163	0.725564	n.s.
ACACA	A0A3Q1N1M4;Q9TTS3;A0A3Q1NJE5	78	0.0378488	0.665866	n.s.
ZNF131	A0A3Q1LUV9	2	0.223244	0.0870314	n.s.
TNS3	A0A3Q1NEL1	11	-0.321471	0.279667	n.s.
MICALL2	F6REL8	19	0.15791	0.510152	n.s.
RBM28	E1BLD4	16	-0.225667	0.160598	n.s.
RELCH	A0A3Q1M6S1	21	0.0862003	0.207691	n.s.
PIK3CB	F1MYM3	24	0.221531	0.134187	n.s.
MAN2A1	A0AAA9SXF2	40	0.233825	0.485021	n.s.
MYO18A	A0AAA9S813	79	0.255237	0.368711	n.s.
XAB2	A0AAF6DMF4	24	0.0316852	0.615441	n.s.
WDHD1	E1B7F5	22	0.156949	0.186298	n.s.
DNAJC17	Q2KI83	6	0.0579697	0.781014	n.s.
SKIC3	A0A3Q1M8Y4	38	0.0714882	0.393372	n.s.
PRPF6	A0AAA9S435;Q2KJJ0	36	0.0218083	0.88108	n.s.
POLE4	A6QQ14	3	0.0230165	0.9091	n.s.
LRRC1	A0A3Q1LTV0	12	-0.150087	0.464566	n.s.
PHB1	Q3T165;A0AAA9SMG6	15	0.0972273	0.534743	n.s.
PCID2	A0A3Q1MVQ2;Q2TBN6	16	0.0897341	0.412737	n.s.
MSTO1	A5D9D4	10	0.102803	0.566956	n.s.
SYVN1	E1BAK9	6	0.338407	0.0345433	n.s.
KIF5B	F1N1G7	31	-0.0592504	0.594162	n.s.
POLR1E	Q3SZ29	11	-0.0242321	0.790867	n.s.
MAN1B1	G3MXQ8;A0AAA9U0J9	17	0.0392394	0.812553	n.s.
ZC3H4	A0AAA9SY77	12	-0.0739245	0.511175	n.s.
SUPV3L1	A0AAF6DLT1	21	0.0267186	0.814396	n.s.
KMT2D	A0A3Q1LM54	7	-0.181826	0.531972	n.s.
NEMF	A0A3Q1MSI2	15	0.0144166	0.853639	n.s.
TYSND1	A0AAA9SAI8	9	0.301028	0.237025	n.s.
EMG1	F1N532	13	-0.115402	0.213128	n.s.
HIP1	A0AAA9TRE6	22	0.0602787	0.734743	n.s.
CCDC137	Q17QR4	7	-0.0684903	0.722574	n.s.
FKBP4	Q9TRY0;F1MU79	32	-0.106232	0.513756	n.s.
FAM98B	A0AAA9T5P2	13	-0.0572859	0.607183	n.s.
SLK	A0AAA9TNL3	35	-0.358463	0.293342	n.s.
RC3H1	A0A3Q1M2R1	8	0.143967	0.135099	n.s.
INPP5D	A0A3Q1LJT8	12	0.269193	0.146321	n.s.
FGFR3	A0AAA9TAT1	2	-0.157884	0.699342	n.s.
GALNT12	A0A3Q1N2Q7	8	-0.0210811	0.963371	n.s.
GALNT2	A0A3Q1M986	19	-0.195514	0.431717	n.s.
NECAP2	A0A452DJD5;Q5E9Q4	6	-0.00293001	0.987749	n.s.
SPATS2L	A0A3Q1NMR2	10	-0.537788	0.271436	n.s.
AQR	A0A3Q1MP16	45	-0.062912	0.404103	n.s.
YWHAE	P62261	17	-0.024398	0.845185	n.s.
WDR75	F1MCR2	20	-0.0187546	0.844583	n.s.
SRRM2	A0A3Q1M0D6	27	-0.306641	0.314637	n.s.
SDHA	P31039;G3MY67	24	0.0731807	0.484218	n.s.
NUP133	F1MM55	34	0.00416772	0.953245	n.s.
HDHD5	F1N6K5	7	-0.0272787	0.83345	n.s.
UGGT1	A0AAA9TE87	43	0.0167031	0.921678	n.s.
IGSF3	A0AAA9SW71	33	-0.527573	0.260982	n.s.
ALDH2	P20000	15	0.133578	0.669054	n.s.
COMMD3	F1MUK6;Q3SZ76	9	0.132334	0.039621	n.s.
CHCHD4	Q2KHZ4	4	0.274105	0.049834	n.s.
CEMIP2	F1MNY2	13	0.0225239	0.892239	n.s.
SRM	E1BM12	19	0.027486	0.918155	n.s.
ITGA3	F1MMS9;A0A452DIV7	13	0.0191565	0.956797	n.s.
SMARCD2	A0AAA9RZX6;E1BJD1	13	0.165603	0.310206	n.s.
GGH	A7YWG4	8	0.795961	0.0310148	n.s.
CNP	P06623	7	-0.417679	0.353004	n.s.
NHSL3	A0A3Q1MXQ4	6	-0.215834	0.613745	n.s.
TFIP11	F1MR60;Q29RR5	22	0.094638	0.342174	n.s.
RIDA	Q3T114	8	-0.0584348	0.728523	n.s.
DERA	Q3T0V9	13	-0.00259511	0.97249	n.s.
SETD3	F6R2J7	17	0.0985586	0.189317	n.s.
DNAJC2	A0AAA9S105;Q1RMH9	16	0.0117962	0.913995	n.s.
DHX29	E1B9N7	27	-0.0687873	0.522232	n.s.
GART	Q59A32	36	0.0265179	0.886621	n.s.
GOLPH3	Q1RMW9;A0AAA9S7T6	9	-0.0811063	0.639398	n.s.
EGFR	A0A3Q1MHB0	30	-0.0193815	0.833829	n.s.
PHOSPHO1	E1BCN8	7	-0.595721	0.231584	n.s.
INF2	A0AAA9SIE1	28	0.182164	0.649928	n.s.
SF3B1	F1MX61	49	0.0572076	0.454587	n.s.
ALG3	F6QW25	2	0.214109	0.298517	n.s.
ERC1	A0A3Q1LTK7	29	-0.143981	0.575109	n.s.
TARS2	A0AAA9S7D5	15	0.0368104	0.836498	n.s.
MAP4	A0A3Q1M9W4;P36225	35	-0.335719	0.0685493	n.s.
MACROD1	Q2KHU5	2	0.127348	0.691377	n.s.
OPA1	A0AAA9S306	38	0.151398	0.161786	n.s.
CYB5R4	Q32LH7	8	0.187951	0.0870201	n.s.
FLNB	A0A3Q1MQ34	122	-0.239555	0.29114	n.s.
CNOT3	E1BCS1	9	-0.110054	0.439246	n.s.
CGNL1	G5E5V6	47	0.0166965	0.944881	n.s.
MRPL2	Q2TA12	7	-0.0843873	0.580984	n.s.
JAGN1	Q2NKY9	3	0.0997353	0.644602	n.s.
UBXN6	Q2KIJ6;F1MES6	11	-0.0400305	0.824468	n.s.
MICU1	Q0IIL1	11	-0.0163831	0.865839	n.s.
KPNB1	E1BFV0	32	-0.0605222	0.658831	n.s.
HSPG2	A0AAA9TDR0	134	-0.7385	0.400118	n.s.
RUVBL2	F1MSD2;Q2TBU9	26	-0.0584302	0.560241	n.s.
TXNDC15	A0AAA9TYR8	6	-0.0282822	0.869995	n.s.
POLR1B	A0AAF6DM82	30	-0.0434512	0.597033	n.s.
PRRC2B	A0A3Q1LY98	7	-0.485763	0.1282	n.s.
IPO4	A0A3Q1N3C7	32	-0.0991788	0.719397	n.s.
DIS3L	A0JN80;F1MEA6	3	-0.0839423	0.882435	n.s.
RARS1	A7YW98	39	-0.0212784	0.877698	n.s.
CDC23	A1A4R8;A0AAF6YT67	15	0.10143	0.4101	n.s.
MYO1B	A0A3Q1MR81	36	-0.310309	0.505259	n.s.
PA2G4	Q3ZBH5	23	0.117148	0.256415	n.s.
EDRF1	A0AAA9TFU8	15	-0.0318745	0.85819	n.s.
KLHDC2	Q5E9A7	6	-0.0148811	0.885547	n.s.
RAF1	A7E3S4	7	-0.0188562	0.81133	n.s.
STXBP1	P61763;A0AAA9TPJ7	16	-0.486439	0.247267	n.s.
STXBP2	F1MHC2	24	-0.00387796	0.978656	n.s.
NT5C2	O46411;A0AAF7AMR3	18	-0.375543	0.295248	n.s.
TFAP2C	Q0VC14	10	0.163127	0.452467	n.s.
NUP188	A0AAA9RVU1	38	-0.0272118	0.679874	n.s.
SMU1	A0AAF6Z1S7;Q2TBS9	16	-0.117745	0.114543	n.s.
MRPL40	A0AAA9SEM5	6	-0.0110118	0.90308	n.s.
TAF15	A0AAA9SH86	2	0.745694	0.0278617	n.s.
FUS	A0A140T861;Q28009	8	0.289124	0.0736914	n.s.
ATP11C	A0A3Q1LWW8;A0AAA9RSX8	19	-0.165306	0.31706	n.s.
ZNF532	A0A3Q1LTH4	4	-0.0768562	0.740755	n.s.
SLC12A6	A0A3Q1M2S7	11	-0.15885	0.52852	n.s.
FOCAD	A0AAA9TVP1	25	-0.13721	0.271021	n.s.
PIGG	A0AAF6DLK5	11	0.026114	0.88308	n.s.
HEATR1	F1MDU9	62	-0.0857614	0.265468	n.s.
NPEPL1	A0AAF6DME4	7	-0.0114221	0.983499	n.s.
EIF4G3	A0A3Q1M1I5	20	-0.0487563	0.909751	n.s.
CCDC91	A0A3Q1LKF0	4	0.364528	0.0812544	n.s.
PRMT5	A0AAA9TZG3;A7YW45	16	0.0150957	0.941906	n.s.
EXOC3	Q0V8C2	12	-0.0207724	0.895482	n.s.
FYCO1	A0A3Q1M133	18	0.00626779	0.881168	n.s.
VPS35L	A0AAA9TRE2	28	0.0771098	0.40194	n.s.
RAB24	F6Q1G9	6	-0.205046	0.519658	n.s.
ARL6IP4	A0AAA9TN08	2	-0.200496	0.290641	n.s.
SPECC1L	E1BJ04	14	-0.0259517	0.735219	n.s.
TTLL12	Q08E58	26	0.0752781	0.68165	n.s.
FARP1	F1MFC6	19	-0.401244	0.176306	n.s.
CDK2	Q5E9Y0	10	-0.0340702	0.477765	n.s.
PLEC	E1BF59	209	-0.421269	0.228914	n.s.
POLG	E1BDI3	8	0.242277	0.0280352	n.s.
BAZ2A	A0AAA9SS13	18	0.109876	0.113553	n.s.
NAPA	P81125;F6Q334	19	0.158501	0.319551	n.s.
ARHGAP17	F1N458	13	-0.0314794	0.895749	n.s.
H6PD	A0A3Q1LRN7	24	0.147489	0.490699	n.s.
QDPR	A0AAF6ZJM9;Q3T0Z7	10	-0.0653817	0.543072	n.s.
CROCC	E1BBS9	7	-0.0803324	0.777863	n.s.
PHKA1	A0AAA9SIN1	3	0.375518	0.0354176	n.s.
SHMT2	Q3SZ20;A0AAA9TQ60	24	0.273986	0.343257	n.s.
FAM83F	E1BM16	7	-0.0176154	0.968054	n.s.
MRPL12	Q7YR75	7	0.135614	0.361946	n.s.
EPS8	A0A3Q1M2P8	9	0.517635	0.0463128	n.s.
XRN2	F1MKX7	23	-0.0179063	0.717839	n.s.
KRT19	A0AAF6YMV1;P08728;A0A3Q1LJB2	19	-0.0770535	0.826475	n.s.
SNRNP200	E1BH78	97	0.0444454	0.543972	n.s.
PRXL2A	Q3ZBK2	14	0.0475904	0.932336	n.s.
EPPK1	A0A3Q1LMV9	98	-0.583584	0.196598	n.s.
NAA10	Q2KI14;A0AAF6ZQB2	9	-0.0546139	0.482161	n.s.
ZNF706	A0A3Q1MFB7	2	0.0773721	0.550958	n.s.
FKBP8	F1N2P6	10	-0.210469	0.117527	n.s.
ELAC2	E1BDK7	22	0.0567104	0.768766	n.s.
UAP1L1	A0AAA9SCV4	18	0.413668	0.00420439	n.s.
RBM33	E1BNF0	6	0.0888832	0.598751	n.s.
SPTAN1	A0AAA9TJI4	142	-0.169515	0.576291	n.s.
MACF1	A0AAA9T0L5	178	0.214302	0.0238274	n.s.
NOL11	Q3MHH2;A0AAF6Z211	16	-0.0369129	0.627192	n.s.
FHOD1	G3MYQ1	13	0.00648475	0.965212	n.s.
EPRS1	A0AAA9TMZ2	73	-0.115691	0.467013	n.s.
WWC1	F1N3I6	7	-0.0656068	0.477165	n.s.
CDK13	E1BB52	9	0.0898029	0.60739	n.s.
ALDH16A1	A0AAA9TSB3;A6QR56	14	0.0351639	0.792045	n.s.
ATR	F1MLY7	17	-0.0321491	0.872284	n.s.
HNRNPLL	F1N7G0	21	0.0237575	0.864465	n.s.
POLR1A	E1BIX2	44	-0.0382446	0.771584	n.s.
RHPN2	A4FUC9	28	-0.49876	0.372568	n.s.
ZNFX1	E1BN24	6	-0.104803	0.433582	n.s.
HUWE1	E1BNY9	92	-0.211261	0.161851	n.s.
HTT	E1B8E7	31	0.0888176	0.500422	n.s.
PTPN23	E1BIU7	29	0.0361161	0.580328	n.s.
KIF2A	Q2NL05;G3N277	17	0.0561124	0.792262	n.s.
NUDT2	Q29RJ1;A0AAF6ZFU3	4	-0.108529	0.641926	n.s.
RPS25	A0A3Q1MTI8;A0AAF6ZQK7;A0A0A0MPA4;Q56JX5;A0A3Q1MT40	4	0.13173	0.20613	n.s.
PAK4	A0AAF6DLY7	9	-0.179842	0.100833	n.s.
NCAPH	A0AAA9SGA9	21	-0.162847	0.277293	n.s.
TRMT5	Q3MHN8	15	0.0957394	0.552357	n.s.
ASPSCR1	F1MTZ8	14	-0.0707038	0.620817	n.s.
PPP5C	F1N719	15	0.107921	0.681585	n.s.
DIMT1	Q2KHT8;A0AAA9SKX4	13	-0.0861137	0.738169	n.s.
GATA2	E1BAM5	5	-0.0515184	0.844748	n.s.
EIF4G1	F1MX04	43	0.00063769	0.995743	n.s.
PPP2R5C	A4FV55	6	0.0357265	0.843582	n.s.
LRP1	E1BGJ0	53	-0.688276	0.306463	n.s.
XPO7	G3N1J2	33	0.204165	0.112142	n.s.
GIGYF2	A0AAA9SKH3	20	-0.234504	0.309368	n.s.
UBE2O	F1N3I3	26	-0.142825	0.589888	n.s.
ISCA1	Q3SZG8	4	-0.206482	0.294666	n.s.
ME1	A0A3Q1MWC7	15	-0.606902	0.105261	n.s.
TUBB6	Q2HJ81;A0AAF6ZEV9	6	-0.0149256	0.817444	n.s.
CCDC85C	F1MZJ7	11	0.23447	0.321209	n.s.
OAS1Y	F1MV66	5	-1.11907	0.0483004	n.s.
ANXA1	F1N650;P46193;A0AAA9SIE7	20	-0.605047	0.248495	n.s.
IMMT	A0A3Q1MFE4	34	-0.0125477	0.934979	n.s.
AMT	A0AAA9TRT8;P25285	12	0.0695849	0.685544	n.s.
MYO5B	A0AAA9SMD5	34	0.153051	0.244508	n.s.
FADD	Q645M6	9	-0.0694393	0.702536	n.s.
ELP1	A0A3Q1M6R3	33	-0.0456759	0.817733	n.s.
MGC134282	Q2TBU1;A0A3Q1MMH2	3	0.248301	0.21199	n.s.
CTNNB1	Q0VCX4;A0AAF6Z2K7	26	0.320847	0.281648	n.s.
ICMT	G3N1V4	3	0.0344547	0.905745	n.s.
PGM2	F6QEU6	23	0.240029	0.311718	n.s.
TRMT2A	E1BMX2	24	-0.13843	0.407957	n.s.
SLC27A6	A6QQD5	24	0.171694	0.91979	n.s.
JUP	Q8SPJ1	26	0.0445436	0.796887	n.s.
ATM	E1BEI6	29	0.056139	0.542088	n.s.
RAI14	A0AAA9STV0	18	-0.495191	0.385553	n.s.
DUS2	F6QF30	7	0.145582	0.377462	n.s.
NIPBL	E1BKC4	33	-0.0179243	0.90731	n.s.
ABCF1	A0A3Q1NB13	32	0.0062871	0.937137	n.s.
PAG10	F6Q3A5	7	2.2315	0.239042	n.s.
KIF11	E1BF29	34	-0.159144	0.54329	n.s.
VCL	A0A3Q1LIB4	50	-0.0661203	0.533659	n.s.
PSMA2	Q3T0Y5;A0A3Q1LX83	11	0.0530613	0.653305	n.s.
YES1	F6S1J8	9	-0.0939843	0.413765	n.s.
SRC	E1BIM8	14	0.0975083	0.539516	n.s.
FBXO22	A5PJX0	9	0.283865	0.0640413	n.s.
QRSL1	Q29RP9;A0AAA9RYD0	14	-0.127727	0.166752	n.s.
ATP23	F1MY08	3	0.0590571	0.523203	n.s.
POLE	A0AAA9SFP0	28	-0.0528914	0.334439	n.s.
THUMPD3	Q2T9W2;F1N027	10	-0.0203724	0.895387	n.s.
RAB3GAP1	A0A3Q1MFP2	27	0.0233903	0.850738	n.s.
FTSJ3	F1MY97	16	-0.00576528	0.965824	n.s.
HYOU1	A0A3Q1MBP1	43	-0.0865679	0.265552	n.s.
NBAS	A0A3Q1MF39	32	-0.022557	0.853486	n.s.
STK24	A0AAA9TSZ5	10	0.150411	0.366259	n.s.
LYN	F1N261	8	-0.0189851	0.924466	n.s.
SMG8	A1A4J7;F1MZ61	12	-0.0974052	0.288896	n.s.
AKAP17A	A0AAA9TKW4	10	-0.0767822	0.538195	n.s.
UTP18	A0AAA9THB3	18	-0.161147	0.132164	n.s.
GAMT	Q2TBQ3	8	-0.055524	0.809058	n.s.
ZNF622	F1N194	11	0.00582631	0.973028	n.s.
CACUL1	F1MUK4	6	-0.0467302	0.759209	n.s.
AFP	Q3SZ57	23	-0.539409	0.7297	n.s.
SREBF2	F1ML06	10	-0.156859	0.369298	n.s.
ACIN1	F6QIB4	18	-0.00727781	0.956322	n.s.
RUSF1	G3N1G1	6	0.0392041	0.889147	n.s.
DDX27	A1A4H6;A0AAF6ZIP1	25	-0.032187	0.831633	n.s.
NPTN	A0A3Q1LL79	5	-0.17382	0.504288	n.s.
FUNDC1	F1N5S9	2	0.0996083	0.691193	n.s.
GCDH	A0AAF6ZG02;Q2KHZ9	5	-0.140797	0.365946	n.s.
PPA1	P37980	13	-0.389226	0.256586	n.s.
NONO	Q2KJ42;A0A3Q1LXP0	20	-0.0159672	0.945831	n.s.
RMDN3	A0AAF6YKI7;Q1JQC5	11	-0.0149274	0.912803	n.s.
METTL1	A0AAF6Z3Q7;Q2YDF1	8	0.122336	0.583766	n.s.
SARS1	Q9GMB8	25	0.207559	0.0760611	n.s.
ARFGAP3	Q17R07	22	-0.18211	0.30836	n.s.
MTIF3	A0A452DIY2;Q32KZ1	6	0.0233055	0.876638	n.s.
PDK3	A0A3Q1MR25	8	0.229407	0.27539	n.s.
TTF1	E1B9V4	7	-0.0547849	0.625372	n.s.
ZNF592	F1N5U2	6	-0.00100597	0.996256	n.s.
QPCTL	A0AAF6ZAY0;Q0V8G3	6	-0.0963751	0.512305	n.s.
MEAF6	Q58CU0	2	0.355537	0.261747	n.s.
UTP20	E1BGE2	49	-0.0478128	0.459206	n.s.
NUP155	A0A3Q1M9F3	43	-0.0641192	0.448613	n.s.
CHCHD9	Q3ZCI0	4	-0.0427984	0.667599	n.s.
SPON1	Q9GLX9	7	-0.21164	0.676984	n.s.
LPCAT1	F1MTK4	9	-0.296584	0.266032	n.s.
PYM1	A6QPH1;A0AAA9SNG8	9	-0.149765	0.27751	n.s.
TKFC	A0JN77;Q58DK4	13	0.383944	0.255139	n.s.
RAB11FIP1	A0A3Q1N1R3	19	0.114549	0.622864	n.s.
SON	F1MYN8	31	-0.126495	0.275886	n.s.
SMN1	A0AAA9RZF6;O18870	6	-0.092819	0.639228	n.s.
ATG4B	A0AAA9TG97;Q6PZ03	12	0.00819683	0.969253	n.s.
SHPK	A0A3S5ZPP1	3	0.708554	0.0215186	n.s.
PHF23	A5D962	4	-0.118695	0.522852	n.s.
NUP107	E1BDU0	23	-0.0183387	0.853295	n.s.
NUS1	A0A3Q1MAW4	5	0.0773174	0.590568	n.s.
UROD	A0AAA9RWR1	9	0.17464	0.349751	n.s.
TRA2B	Q3ZBT6	8	0.0939329	0.482662	n.s.
HEATR5B	E1BB26	41	0.273607	0.147222	n.s.
LYAR	A0AAA9RX06	16	-0.0630547	0.430046	n.s.
CBS	A0A3Q1LSY7	14	-0.119543	0.601805	n.s.
GIT2	A0AAA9S5N2	6	-0.0927914	0.44273	n.s.
UBR4	A0AAA9TU63	117	0.0916389	0.31231	n.s.
FLII	F1N365	33	0.0357178	0.76967	n.s.
ILVBL	A6QQT9;A0AAF7APW4	15	0.261597	0.316242	n.s.
NUP214	F1MH31	33	-0.135828	0.322025	n.s.
RRP12	A0A3Q1M070	39	-0.0931514	0.348488	n.s.
NFYC	A0AAF6ZUW3;Q5E9X1	2	-0.0713949	0.459115	n.s.
ETFDH	A0A452DIQ6;Q2KIG0	13	0.212437	0.252731	n.s.
CAT	P00432	13	0.130544	0.755388	n.s.
DHTKD1	E1BFI2	11	-0.211433	0.334318	n.s.
DICER1	F1MCQ5;Q6TUI4	17	-0.160096	0.399985	n.s.
HSPBP1	Q2KJ77	15	-0.181787	0.465587	n.s.
ARHGEF39	A0AAA9TVJ4;Q0P5E3	5	-0.117045	0.672219	n.s.
OSBPL3	F1MLJ5	24	0.183806	0.455411	n.s.
REPS1	F6Q4T4	20	0.292508	0.0709899	n.s.
DST	A0AAA9S4P4	29	-0.511561	0.339821	n.s.
NCLN	A0A3Q1NCG7	17	0.020731	0.878152	n.s.
HKDC1	F1MIM3	38	0.310669	0.267284	n.s.
RBM14	F1MI47;Q5EA36	23	-0.448658	0.0247146	n.s.
LAMB1	F1MNT4	48	-0.732619	0.233611	n.s.
SHTN1	A0A3Q1MCX8	29	0.420441	0.159217	n.s.
ZNF428	E1BJ55	4	-0.604146	0.164313	n.s.
CSNK1A1	A0A3Q1LK11;P67827;A0A3Q1MI36	11	0.0206704	0.852868	n.s.
THOC6	A0A3Q1MZJ3	16	-0.125333	0.143853	n.s.
NOP14	F6RNL0	22	-0.104629	0.357981	n.s.
ADARB1	F1N0T4	3	0.623852	0.36981	n.s.
CLIP1	E3W9A2	45	-0.171347	0.318932	n.s.
VPS53	A0AAA9SLW2	13	0.0608428	0.463571	n.s.
SLC4A2	F1N4L1	13	-0.18546	0.711803	n.s.
NDUFS8	P42028;A0A452DIK3	5	0.235046	0.257523	n.s.
CCDC50	A0A3Q1MBX8	6	-0.0372907	0.765129	n.s.
MDN1	A0AAA9TK27	116	-0.100169	0.360804	n.s.
CST6	Q5DPW9	10	0.269886	0.843818	n.s.
RNPEP	G3X743	19	0.246427	0.0566444	n.s.
CEP350	E1BC48	7	0.110965	0.533397	n.s.
BRWD1	F1MTQ0	10	-0.102607	0.552547	n.s.
FUBP3	A6QP83	13	-0.0869869	0.427987	n.s.
PEX11B	Q148K5;A0AAF6YS65	8	0.387544	0.0214721	n.s.
PALLD	A0A3Q1MYK9	23	-0.128494	0.465711	n.s.
TBCD	A0AAA9SWC2;Q28205	31	-0.0185102	0.888389	n.s.
MACROH2A1	A0AAA9T2Q5	10	0.0941916	0.734049	n.s.
ACOT7	A0A3Q1N7U4	15	-0.0261032	0.845446	n.s.
NOSIP	Q3SWY5	10	0.323991	0.0903092	n.s.
ARHGEF7	A0A3Q1M3G8	17	0.0914507	0.43738	n.s.
SPTBN2	A0AAA9TB55	63	0.256643	0.409252	n.s.
PRKAR2A	A0AAF6YZS2;P00515	14	0.0591841	0.764303	n.s.
RIOK3	Q1RMT7	5	0.0672215	0.635401	n.s.
ANXA4	A0AAF6YHR8;P13214	18	0.309667	0.428886	n.s.
ACSF2	Q17QJ1	14	-0.0817672	0.859772	n.s.
AKR7A2	F1MZC0;A0AAA9S338;A0AAA9SP77	14	0.315402	0.201987	n.s.
GEMIN5	E1BJG3	44	-0.0315383	0.859567	n.s.
EIF4B	F1MYS7	13	0.0790512	0.705279	n.s.
ADSL	F1MHP6;A3KN12	21	-0.163962	0.537975	n.s.
SUPT16H	E1BNP8	38	0.00957346	0.745528	n.s.
GBF1	E1BMC4	40	-0.0431398	0.610093	n.s.
UBXN4	Q3ZBU9	10	0.0762675	0.705912	n.s.
MB21D2	E1B9A3	6	0.0200514	0.965181	n.s.
SH3BP1	E1BH11	17	0.281109	0.154823	n.s.
CCDC22	Q1RMI8	18	0.0171415	0.906076	n.s.
COA7	A0AAA9TD90	6	0.145727	0.317794	n.s.
TOP2B	A0AAA9T1Q6	28	0.203834	0.426886	n.s.
ANLN	A0AAA9S9M8	31	-0.0533193	0.922696	n.s.
MNAT1	Q3SX39	9	0.190275	0.221372	n.s.
GCN1	A0AAA9SA20	100	-0.0282811	0.792258	n.s.
SEL1L	F1MGJ5	18	0.0788598	0.494741	n.s.
MYCBP2	A0AAA9RZQ5	42	0.0830422	0.620516	n.s.
ARHGAP21	A0A3Q1M9B2	15	-0.298198	0.333121	n.s.
GOLGA5	F6RNZ4	22	-0.0112034	0.940659	n.s.
WASHC2A	F1MTG3	26	0.0643234	0.562749	n.s.
PKP3	A0A452DJL3;Q08DQ0	30	-0.0552319	0.67075	n.s.
SLC35B1	Q8MII5;A0A3Q1MTA4	3	0.0459908	0.785186	n.s.
SPTLC1	Q3MHG1	16	-0.195286	0.0166387	n.s.
KDM3A	E1BFC2	10	-0.0178434	0.750096	n.s.
PKN2	F1MFK1	21	-0.16736	0.254358	n.s.
PKP2	A4IF71	38	-0.141699	0.149389	n.s.
CEP192	A0A3Q1LJH6	12	-0.017592	0.890235	n.s.
IDH3B	O77784	13	-0.248257	0.182503	n.s.
NIFK	Q3SZM1;A0AAF6ZAT9	15	-0.212928	0.220183	n.s.
LXN	A0AAA9T613	3	0.326661	0.388371	n.s.
BRD4	E1BNS3	17	-0.0124009	0.850913	n.s.
DSG2	A0A3Q1MKM2	38	-0.0836109	0.2862	n.s.
TRIM24	A0A3Q1LM29	11	0.0470738	0.704693	n.s.
STRAP	Q5E959	19	-0.19283	0.244846	n.s.
TRMT6	A0AAF6YIK1;Q2T9V5	17	0.018055	0.921455	n.s.
TRIM36	A0A3Q1N3G7	25	0.191658	0.672458	n.s.
PDIA6	A0A3Q1MRD2;F6QH94	18	0.00156339	0.988544	n.s.
GCH1	A0AAA9SF01	7	-0.0444758	0.869708	n.s.
TMF1	F1MUW6	26	0.0424472	0.48051	n.s.
GPAM	F1MDT6;Q5GJ77	15	0.00827479	0.963611	n.s.
PIGS	Q3SZL5;A0AAA9RZX1	10	0.022446	0.89735	n.s.
MLLT10	F1MLK4	5	0.296735	0.115547	n.s.
MICAL1	F1MH07;A0AAF6YSC4	16	0.649586	0.10739	n.s.
MCCC2	E1BPP6	18	0.188545	0.256684	n.s.
COL18A1	F1N6W9	23	-0.703706	0.384437	n.s.
SYPL1	A0A3S5ZPC1	3	0.0434004	0.613992	n.s.
EPB41L5	Q58CU2;A0A3Q1LUC0	18	-0.575393	0.0942492	n.s.
GLE1	Q3ZBK7;A0AAF6Z191	13	-0.0832375	0.299293	n.s.
SMC1A	O97593	44	-0.00472577	0.957973	n.s.
GOLGA3	A0AAA9SFD3	40	-0.0976974	0.378317	n.s.
RPAP1	A0JN53;A0AAF7AML4	24	0.0371296	0.815485	n.s.
APOE	Q03247;A0A3Q1LPF0	13	-0.787553	0.249861	n.s.
CCDC71L	A0AAA9TH50	2	-0.163213	0.60469	n.s.
AFAP1L2	Q17R10;A0AAA9SM25	19	-0.0385146	0.640119	n.s.
NUCB2	A0AAA9U1W7	16	0.0947394	0.703788	n.s.
TACC2	A0A3Q1N9Q2	31	0.224771	0.525109	n.s.
LSR	F6RR15	11	0.0432169	0.782217	n.s.
GALK2	A0AAA9SZH8	11	0.133207	0.60167	n.s.
DYNC1H1	E1BDX8	201	-0.0104982	0.91885	n.s.
SEC23A	F1MVW5;A2VDL8	21	-0.259473	0.443796	n.s.
DDX50	F1MMK3	17	-0.250168	0.171843	n.s.
ASRGL1	Q32LE5;A0AAF6YQE1	9	0.276173	0.0799613	n.s.
HSD17B4	A0AAA9TEQ9	29	0.00980488	0.949852	n.s.
ACAT2	Q17QI3	11	0.00129588	0.994542	n.s.
PPP1R21	A0A3Q1LG54	18	0.0944362	0.498264	n.s.
UBA1	A0AAA9SHQ7;A3KMV5	35	-0.0237741	0.683826	n.s.
NOC2L	A0AAF6Z2P7;Q3SYU1	15	-0.0681955	0.390218	n.s.
NOLC1	A0A3Q1MIW9	11	-0.112722	0.505454	n.s.
EDC3	E1BEA2	14	-0.082829	0.509091	n.s.
ADH5	Q3ZC42	9	-0.166067	0.331129	n.s.
MRPS30	P82924	12	-0.13737	0.381136	n.s.
ETFA	F1MWR3;Q2KJE4	14	-0.00693734	0.970548	n.s.
PGM3	A0A3Q1LUV2	19	0.0283074	0.811541	n.s.
CHD4	F1N3F6	35	0.0651248	0.125188	n.s.
SEPTIN8	A0A3Q1LN12;Q0VCP4	11	0.315931	0.166886	n.s.
RAB3IL1	Q2KJ58;A0AAA9TVL6	8	-0.52947	0.281222	n.s.
HSPD1	G3N0R5;P31081	31	-0.00795078	0.942217	n.s.
CENPF	F1N1F8	42	-0.0595175	0.642985	n.s.
DOCK6	E1BK77	34	-0.0416133	0.840359	n.s.
PSMD1	A7MBA2	34	0.152859	0.0946259	n.s.
HAUS7	A0AAA9SKB6	8	-0.0505037	0.415859	n.s.
EWSR1	A0A3S5ZPJ4	6	0.292855	0.0851277	n.s.
NAA35	A0AAA9SHQ2	17	0.178163	0.064587	n.s.
CARS1	A4FUC8	44	-0.0223424	0.809562	n.s.
ALAD	Q58DK5	16	-0.577592	0.128713	n.s.
DDX10	Q08DT0	19	-0.115851	0.389632	n.s.
SF3B2	F1MC31	25	-0.0286298	0.742369	n.s.
GTPBP4	A0AAA9T915	24	0.09083	0.342502	n.s.
APIP	Q0VCJ2	6	-0.265599	0.225657	n.s.
PRPF8	A7Z025	80	0.0267871	0.785104	n.s.
PRODH	Q148G5;G3N3Y2	13	0.132819	0.683572	n.s.
ENAH	F1N214	16	0.166171	0.729311	n.s.
ENO1	Q9XSJ4;F1MB08	18	-0.051376	0.715282	n.s.
ISG20L2	Q2YDK1	7	-0.300421	0.206996	n.s.
MED13L	A0AAA9T6T6	9	-0.00568533	0.966221	n.s.
CARS2	Q2KIF8;A0AAA9SEB2	6	0.181636	0.219279	n.s.
MMUT	Q0III1;Q9GK13	21	-0.0783197	0.664836	n.s.
NCOR1	A0AAA9RZH3	10	-0.305349	0.0340152	n.s.
REEP5	Q29RM3;F1MDM4	8	0.349424	0.322713	n.s.
PDS5A	E1BKG4	35	0.0654365	0.447995	n.s.
POLA1	A0AAA9THK8	27	-0.170884	0.038827	n.s.
TOR1AIP2	A5PKH0	10	0.14205	0.632097	n.s.
EBP	Q3ZBT8	2	0.0158353	0.967222	n.s.
LIG3	F1MQY1	25	-0.134439	0.069718	n.s.
LENG8	A0A3Q1ML38	8	-0.159171	0.380972	n.s.
OPA3	G3MYY7	2	0.150256	0.794321	n.s.
DNAJC14	Q95J56	3	-0.13203	0.47092	n.s.
UMPS	P31754;A0AAA9T4P2	17	-0.277404	0.16051	n.s.
GDF6	P55106;A0A452DKC3	8	0.848686	0.389096	n.s.
FAT1	A0A3Q1M5W5	49	-0.306059	0.337904	n.s.
YKT6	A0AAF6YH77;Q3T000	11	0.0616849	0.689789	n.s.
LMNA	F1MYG5	39	-0.143748	0.759455	n.s.
ALDH5A1	A0AAA9TXM1	20	0.175819	0.590635	n.s.
FUT4	Q8HZR3;F1MDG4	6	0.0427547	0.884422	n.s.
TPCN2	A0A3Q1MD89	8	-0.0408928	0.751875	n.s.
CCAR2	E1B9H3	18	-0.0482163	0.766533	n.s.
FTO	A5D798	12	-0.277595	0.141526	n.s.
CCDC124	Q2TBV6	11	0.242627	0.0316303	n.s.
PABPC1	P61286	15	0.067152	0.320857	n.s.
UBE4B	A0A3Q1MHZ2	36	0.123542	0.362539	n.s.
GNB1	P62871	5	-0.0597056	0.738735	n.s.
DNAAF5	G3N314	17	-0.141004	0.477168	n.s.
TPK1	Q5E9T4	4	0.244468	0.290448	n.s.
PGK1	Q3T0P6;A0AAA9SR81	30	-0.00776784	0.919815	n.s.
FSCN1	Q3MHK9	25	0.401225	0.227474	n.s.
VPS35	Q2HJG5	30	0.161912	0.181116	n.s.
HEATR6	E1BHR5	12	0.00125583	0.99297	n.s.
CRYZL1	A0AAA9RYU5;Q59A28	10	-0.113429	0.421973	n.s.
AKR1B1	P16116;A0A493UA87;A0A3Q1MBL5;A0A3Q1M9Q1;A0AAA9TRD4	25	0.301852	0.276668	n.s.
ERBB2	A0AAA9SBR4	20	0.208336	0.615675	n.s.
FNDC3B	F1MPN0	18	-0.15581	0.328695	n.s.
CTU1	E1BII1;Q0VC66	6	0.0343041	0.921445	n.s.
LAMC1	F1MD77	51	-0.684784	0.327125	n.s.
SMPDL3B	A6QQN6	16	0.557469	0.696221	n.s.
ZMYND11	A0A3Q1LJL9	6	0.217417	0.166606	n.s.
DDX41	F6QYF9	24	-0.00693758	0.940777	n.s.
LSS	F1MTJ9;P84466	24	0.110387	0.707572	n.s.
NUB1	Q8MJ87;F6QQ96	10	0.0132447	0.962188	n.s.
MMS19	E1BP36	32	-0.209623	0.14261	n.s.
DFFA	Q0VC37	10	0.287514	0.207245	n.s.
ITPR3	Q8WN95;E1BKE7	72	0.152733	0.499028	n.s.
USF1	Q6XBT4	2	-0.172693	0.352352	n.s.
FHIP2A	G3X6C8;A0JNG7	13	0.086441	0.530365	n.s.
MAVS	A0AAA9S9F2	7	0.0693875	0.752887	n.s.
TTC38	A0A3Q1M6S8	9	0.235292	0.485993	n.s.
C3	Q2UVX4	23	0.826935	0.256175	n.s.
POFUT2	F1MPI4	10	-0.363359	0.225578	n.s.
ARFGEF1	E1BP90;O46382	30	-0.103686	0.546845	n.s.
ZNF330	Q32LC9;E1BD90	7	0.19144	0.182832	n.s.
GNL3L	Q3T0J9;A0A3Q1MFA8	22	-0.116603	0.376018	n.s.
BIRC6	E1BE13	73	0.096722	0.280817	n.s.
LASP1	Q3B7M5	17	-0.338136	0.242206	n.s.
VARS1	A0AAA9T803	42	-0.00314363	0.980673	n.s.
TRAPPC8	A0A3Q1N5L8	29	0.000739574	0.994983	n.s.
RBM17	A7MB77;A0A3Q1M2Z2	11	-0.152185	0.473837	n.s.
GNB2	P11017	4	0.044984	0.714358	n.s.
ZFYVE1	E1BPK7	7	0.157091	0.37509	n.s.
FGD4	A0A3Q1LSC0	24	0.276057	0.300178	n.s.
ERCC6L	A6QQR4	22	-0.208017	0.17693	n.s.
VAT1	F1MUP9	18	-0.285432	0.635513	n.s.
MSRB3	A0AAA9TIS6	6	0.316283	0.249761	n.s.
HGS	A0AAF6YHD5;Q0V8S0	15	0.0236791	0.794014	n.s.
DSP	E1BKT9	163	0.0506654	0.707652	n.s.
RFFL	A0AAA9SVB5	6	-0.0351617	0.777388	n.s.
SNU13	Q3B8S0	7	-0.0478622	0.575265	n.s.
TRMT1	A0AAA9SJY9	18	-0.0205206	0.922616	n.s.
TPP2	A5PK39;A0A3Q1M996	42	0.112615	0.112346	n.s.
CENPP	A0A3Q1N198	2	-0.292105	0.2607	n.s.
STAT2	E1B8Z4	16	-0.0914971	0.504464	n.s.
UBA6	F1ME38	26	0.0498888	0.676138	n.s.
TADA2B	G5E6P9;G3MYD1	4	0.0888055	0.716296	n.s.
MMAA	A6QQI8	7	0.229213	0.248845	n.s.
IQSEC1	A0A3Q1MCH9	6	-0.0969762	0.3927	n.s.
IQGAP3	A0AAF6DLK2	45	0.00827265	0.97344	n.s.
EXT2	A0A3S5ZPA0;O77783	6	0.123271	0.490756	n.s.
CRELD1	A0AAA9SSY0;Q5EA46	10	0.170922	0.128636	n.s.
CTSF	Q0VCU3	5	-0.802606	0.0981327	n.s.
PSMC2	Q5E9F9	27	0.109264	0.321486	n.s.
MTOR	E1BFB4	43	0.00991718	0.848534	n.s.
ACTN1	Q3B7N2	32	0.0201853	0.931649	n.s.
ACTN4	A5D7D1	44	0.124406	0.366348	n.s.
SUPT4H1	Q3SYX6	2	0.00542959	0.946503	n.s.
ELMOD2	Q08DZ3	6	0.344692	0.0750218	n.s.
ALDH3B2	A0A3Q1LKF2	7	0.674382	0.0504796	n.s.
URB1	F1MZA7	47	-0.0300622	0.463211	n.s.
WDR62	A0AAA9S2T5	13	-0.192224	0.349584	n.s.
LMNB2	F1MJI7	33	-0.012026	0.941973	n.s.
IAH1	Q3SZ16;A0AAA9TS64	8	0.263302	0.0909182	n.s.
WDR11	A6QLS8	29	0.0625591	0.236455	n.s.
NUP85	Q3ZC98	15	0.0312163	0.666437	n.s.
ITGA6	A0A3Q1M8K4	39	0.0487955	0.870516	n.s.
GRWD1	Q1JQD2;A0AAF6YGY8	13	0.000513554	0.998389	n.s.
PELP1	A0A3Q1MDL1	18	0.0859555	0.414094	n.s.
PTPRA	E1BPA0	11	0.0288189	0.928161	n.s.
GPAT3	E1BGF8	19	0.241714	0.385919	n.s.
GPAT4	A3FPG8;A6H7D4	12	-0.0401659	0.704746	n.s.
HECTD3	F1MJS5	21	0.102995	0.0682202	n.s.
PCM1	A0A3Q1LX22	16	-0.0275275	0.825887	n.s.
RPA2	A0AAA9TRL7;A0A3Q1MFW6;F6RU89;A0A3Q1MGF7	6	-0.12785	0.408989	n.s.
TLN2	F1MQI1	40	-0.600638	0.358334	n.s.
NELFCD	F1MW69	16	0.0435516	0.820791	n.s.
ADAMTS9	E1BI72	19	0.00488432	0.993286	n.s.
NID1	A6QNS6	32	-0.772294	0.249706	n.s.
TRRAP	A0AAA9SVS0	67	0.0563021	0.667839	n.s.
DNMT1	Q24K09;F2Z4J5	33	-0.17188	0.413018	n.s.
WRAP73	A0AAA9S0S2	2	-0.228343	0.426419	n.s.
RPS3A	Q56JV9;G3N262;A0AAA9RXK0;A0AAA9TAX3;A0A3Q1N7H0;A0AAA9ST32	19	0.0111373	0.938614	n.s.
ARFGEF2	A0AAA9T9B3	34	0.259003	0.0503677	n.s.
HEATR5A	E1BGU0	21	0.264472	0.0626345	n.s.
MMS22L	A0A452DHT7;E1BGH8	12	-0.0895581	0.503204	n.s.
ALG1	F1N2J7	10	0.109826	0.264688	n.s.
MFSD5	Q0VC03	6	0.164669	0.407626	n.s.
LTN1	F1MTS8	31	0.00105858	0.995135	n.s.
SHROOM3	A0A3Q1NCP3	12	0.148139	0.551415	n.s.
PARP1	P18493;A0AAA9SJL9	42	0.0967072	0.683481	n.s.
SQLE	A5D9A8	12	-0.0962685	0.772543	n.s.
PLBD2	F1MIH9;Q2KIY5	20	0.846019	0.168848	n.s.
ISYNA1	Q2NL29;A0A3Q1MTD4	15	-0.11232	0.732797	n.s.
NEPRO	A0AAA9SA39	3	-0.263681	0.0466758	n.s.
PDCD11	A7MB10;G5E5C4	58	-0.0850546	0.480151	n.s.
WFDC2	G3MX65	2	-0.595252	0.719181	n.s.
NADK	F1MCL6	8	0.0440274	0.853747	n.s.
BTBD3	A0A3Q1N6X6	3	0.176439	0.350851	n.s.
SBF1	G5E5Q8	23	0.102631	0.133001	n.s.
KDM2A	F1N735	22	-0.0499387	0.721597	n.s.
CHID1	Q5EAB4	11	0.117428	0.54356	n.s.
ATP1A1	Q08DA1	25	-0.41348	0.240884	n.s.
KMT5C	A0A3Q1M6A7	5	0.445397	0.232885	n.s.
IPO7	E1BGE5	27	0.00243855	0.989703	n.s.
ACTR1B	A4IFE3	5	-0.537547	0.0968578	n.s.
ACTR1A	F2Z4F0	12	0.0983926	0.235184	n.s.
DUSP28	A0A3Q1MH98	3	0.136748	0.363114	n.s.
SGF29	E1BN74	2	-0.0796534	0.642398	n.s.
ERLIN2	Q1RMU4	13	0.0170355	0.945976	n.s.
DYNC1I2	F1N7H7;Q0III3	16	-0.0871755	0.417763	n.s.
LMBRD2	A0AAA9T184	4	0.495859	0.0101871	n.s.
ERLIN1	G3N0U8	10	-0.045482	0.722522	n.s.
CASK	A0AAA9TVT5	19	-0.750104	0.189427	n.s.
CXXC1	Q5EA28	7	-0.00512838	0.961305	n.s.
JMJD6	A0A452DJR2;Q58DS6	14	0.00804329	0.967993	n.s.
RNASEH2A	Q2TBT5	7	-0.0964062	0.545091	n.s.
PLRG1	Q2KID6;A0AAF6ZAG7	16	0.0271711	0.855918	n.s.
HIP1R	A0AAA9SBB5	40	-0.218291	0.365996	n.s.
ZFAND5	A7MBA8	3	0.67914	0.0761648	n.s.
AHSA1	Q3T0G3	16	-0.235709	0.547534	n.s.
TUFM	P49410;A0AAF6Z672	25	0.0474124	0.715875	n.s.
BCAR3	A0A140T848;Q58DL5	22	-0.228171	0.0163506	n.s.
AP1G1	A0A3Q1M952	18	0.141358	0.261512	n.s.
AP1G2	F6QYT8	27	0.258805	0.102255	n.s.
FBXO6	Q3SX24	11	0.17932	0.419084	n.s.
RECQL	A0AAA9S5G9	15	-0.0340567	0.752096	n.s.
SEPTIN5	Q0VC68	10	0.334901	0.561974	n.s.
RIC1	F1MKR0	13	0.0489434	0.785166	n.s.
TBC1D9B	A0A3Q1LTG9	15	0.359486	0.128554	n.s.
SCP2	F1MV74;P07857	23	0.345721	0.19835	n.s.
SND1	Q863B3	47	0.152808	0.135102	n.s.
C1GALT1	A0AAA9T2P8;Q0VC84	13	-0.135775	0.714896	n.s.
NES	A0AAA9TRB0	34	-0.645632	0.349608	n.s.
NOL6	A5PJU0	23	-0.194983	0.223037	n.s.
SEC14L4	A0A3Q1LYF4	7	0.363207	0.229033	n.s.
SAMHD1	Q0VCA5	19	-0.239374	0.381295	n.s.
LETM1	F1N3R4;Q0VCA3	26	0.0685862	0.639115	n.s.
MAP2K6	Q5E9X2	3	0.160656	0.563315	n.s.
DCPS	Q8MJJ7;G5E535	6	-0.186924	0.341781	n.s.
HERC1	F1MNS0	50	0.14113	0.157274	n.s.
WBP11	E1BNM6;A0A3Q1MQG9;A0AAA9TF65	17	-0.0520997	0.565616	n.s.
ATP6V0D1	A0AAF6Z0J8;P61420	12	0.21685	0.285485	n.s.
PC	Q29RK2	47	0.161032	0.548253	n.s.
CHMP4A	A2VDY3;A0AAA9T8M2	8	0.136354	0.349965	n.s.
UHRF1	A7E320	15	-0.162649	0.420683	n.s.
PITPNB	Q9TR36	13	-0.0192218	0.862006	n.s.
NUTF2	Q32KP9;A0AAF6YPQ4	3	-0.0919946	0.493203	n.s.
CUX1	F1N693	13	-0.102617	0.716517	n.s.
PLXNB2	G3X755	35	-0.229126	0.335492	n.s.
MYH9	F1MQ37	109	-0.159723	0.565697	n.s.
ACSL3	F1MEX9	31	-0.0928232	0.807348	n.s.
SMPD4	F1MBU2	24	0.0743138	0.352202	n.s.
COMMD7	Q3MHX1	6	0.0353193	0.797776	n.s.
DAD1	Q5E9C2;A0AAF6Z6H0	4	-0.00605822	0.957021	n.s.
FAM76B	A0AAA9SAS8	2	-0.131931	0.42136	n.s.
FAM76A	F1N6L6;Q5EA89	2	0.1804	0.534921	n.s.
SERPINB9	F6Q447	12	1.65483	0.358498	n.s.
SERPINB6	O02739;A0A3Q1MJK1;A0A3Q1NAJ0	5	-0.432635	0.658623	n.s.
MIOS	E1B899	15	0.0417082	0.64202	n.s.
MYO1D	A0AAA9RSU9;Q17R14	51	0.200379	0.176933	n.s.
CCDC97	A3KMW0	5	0.0359471	0.741703	n.s.
TEFM	F1MDZ0;A6QPR9	7	-0.00357374	0.990691	n.s.
SPHK2	E1BJM1	12	0.0375309	0.730783	n.s.
TJP1	A0AAA9S4Y0	63	-0.125042	0.511907	n.s.
LIG1	A0A3S5ZPU0	22	-0.219926	0.535157	n.s.
IGF2R	F1MIE6;P08169	43	-0.426751	0.376519	n.s.
CDC42BPG	A0A3Q1MA37	21	-0.0988824	0.322863	n.s.
NET1	Q3ZC77	11	-0.0256878	0.741245	n.s.
ACADS	Q3ZBF6;A0AAA9SUD1	13	0.0329706	0.903808	n.s.
ATXN10	Q2TBW0;A0AAA9SI20	18	-0.398234	0.229487	n.s.
SERPINC1	F1MSZ6;P41361	9	-0.0224391	0.967206	n.s.
KIAA0930	F1MEV2	9	0.310219	0.158019	n.s.
MRPL24	Q3SYS0	10	-0.115748	0.477209	n.s.
EMC1	A0A3Q1M175	35	0.0400343	0.532712	n.s.
ATXN2L	E1BJ59	24	-0.18332	0.277995	n.s.
ZC3HAV1	E1BCF8	27	-0.669591	0.451576	n.s.
TBC1D10B	F1MJZ7	10	-0.00484403	0.984903	n.s.
AFDN	A0A3Q1M9W3	57	0.123554	0.262058	n.s.
PTK7	F1MWK8	22	-0.504569	0.361551	n.s.
DLD	F1N206	14	-0.0508265	0.642293	n.s.
ATP11A	A0A3Q1MCZ4	3	-0.810099	0.179318	n.s.
CTPS2	A0A3Q1LLS1;Q1RMS2	12	0.022971	0.86317	n.s.
HNRNPR	A0A3Q1MI86	17	-0.0480288	0.822562	n.s.
TERF2IP	Q0VCT3	6	0.0312013	0.830201	n.s.
LHPP	Q0VD18	8	-0.409235	0.239924	n.s.
RPS8	Q5E958;A0AAF6Z178	11	0.0724338	0.605469	n.s.
BROX	A0AAA9T5V2	4	0.233406	0.178032	n.s.
PSMC6	Q2KIW6;A0A3Q1LQF0;A0AAA9SEL8	18	0.0401427	0.644421	n.s.
HSP90AB1	Q76LV1;G3N2V5;A0A3Q1LTQ4	32	-0.121291	0.525418	n.s.
RPSA	P26452	13	0.0541379	0.502082	n.s.
ACO2	P20004	37	-0.0234432	0.758593	n.s.
AHNAK	F1MCK2	222	-0.594416	0.217751	n.s.
GOLGA4	A0A3Q1N365	91	0.136287	0.38572	n.s.
EIF2S1	P68102	16	0.110738	0.200404	n.s.
ABCE1	A4IFE6	22	-0.0975459	0.635056	n.s.
GLG1	A0AAA9SE43	46	-0.292867	0.335839	n.s.
LARS1	A0A3Q1N108	50	-0.0661438	0.655311	n.s.
TYRO3	A0A3Q1LRR9	11	0.0606414	0.725161	n.s.
FARSB	A0AAA9SPL5	22	0.142724	0.289788	n.s.
ATP5F1C	P05631	8	0.0217827	0.858827	n.s.
HNRNPM	A0A3Q1MJD5	29	-0.074519	0.692154	n.s.
PAIP1	G3MZ83;F6RWP3	10	0.00513172	0.971323	n.s.
ATP6V0A2	O97681	15	-0.00618219	0.972747	n.s.
RAB28	Q3SWY9	5	-0.00184941	0.985111	n.s.
PSAP	P26779;A0A140T8C6	29	0.306946	0.50419	n.s.
MARS1	F1MDW1;Q2T9L8	26	-0.0306018	0.789946	n.s.
MIPEP	A0AAA9SQY1	21	-0.0683276	0.383494	n.s.
GTF2F2	Q2T9L9	9	0.105084	0.592624	n.s.
GNL3	E1BMI6	18	-0.218557	0.261786	n.s.
EIF2A	A0AAA9SB04	24	0.0274827	0.828926	n.s.
SGSH	E1BFX4	12	0.832254	0.221897	n.s.
UBE2L3	Q3MHP1	8	0.156171	0.310064	n.s.
POP4	A0AAF6YJ89;Q2KIB9	5	-0.0419528	0.851183	n.s.
ANKRD27	F1N642	14	0.236297	0.451052	n.s.
RNF141	Q32L15	3	-0.00984414	0.97017	n.s.
NIF3L1	Q05B89	10	0.00494933	0.974718	n.s.
HSP90AA1	A0A452DI85;Q76LV2;A0AAA9ST28	34	-0.0144355	0.943552	n.s.
ascc3	E1BNG3	30	-0.00547377	0.759933	n.s.
SLC30A10	G3X6F6	6	-0.804906	0.14616	n.s.
CPT2	Q2KJB7;F1N1M7	23	0.0541519	0.833331	n.s.
MYH14	A0AAA9S4Q7	72	0.862876	0.462741	n.s.
PWP2	E1BL00	15	-0.161916	0.260578	n.s.
WNT6	F1MN70	6	-0.400712	0.131598	n.s.
UTRN	A0AAA9TJR2	72	-0.501976	0.310794	n.s.
RHOT2	Q5E9M9;A0AAF6YME1	10	-0.0256101	0.763132	n.s.
SORBS2	A0A3Q1NDV3	17	0.767076	0.41793	n.s.
HGH1	F1MW97	13	0.061209	0.489924	n.s.
KCTD9	A0A3Q1M937	3	0.437912	0.180213	n.s.
RALGAPB	F1MCG4	9	-0.0339969	0.676289	n.s.
JMJD8	A0A3Q1N4Y8	4	0.287703	0.3488	n.s.
UQCRC1	G1K1X0;P31800	19	-0.0278138	0.805781	n.s.
XPO4	F1MVW4	24	0.105089	0.521991	n.s.
SLC39A4	Q1KZG0	5	-0.155586	0.79103	n.s.
DTL	A0A3Q1MLX1	14	-0.179507	0.551806	n.s.
LOC107132045	A0A3Q1M8G4	2	-0.811551	0.262052	n.s.
MIDEAS	E1BI11	10	-0.0329193	0.861858	n.s.
DOCK9	A0AAA9RS28	63	-0.123122	0.314971	n.s.
CSAD	E1BP41	14	-0.0379146	0.926328	n.s.
MYH10	Q27991;A0AAA9SL38	95	-0.0239703	0.854914	n.s.
GUK1	P46195	10	-0.0398334	0.726311	n.s.
SUGP2	E1BE55	11	-0.478089	0.022096	n.s.
ATP5PF	A0A452DJ42;P02721	3	0.0921208	0.59415	n.s.
SSH2	E1BPN5	10	0.0777111	0.71415	n.s.
HADHA	Q3SZ00	22	0.471552	0.461075	n.s.
ABCB7	E1BPL3	12	0.0951309	0.384962	n.s.
CCDC90B	A0AAA9TGQ0	3	0.154182	0.49368	n.s.
NUP205	A0A3Q1N4S4	55	-0.0461925	0.495197	n.s.
SLC38A10	A0A3Q1LQW5	11	-0.0474669	0.859041	n.s.
NHP2	Q5E950	4	0.0325224	0.649464	n.s.
UBA2	A4FV12	19	-0.00847244	0.954035	n.s.
CHTF18	E1B8Q4	17	-0.291626	0.139598	n.s.
GGTA1	P14769	13	0.162957	0.466875	n.s.
RPS6KA1	A0AAA9SJ92	17	-0.237473	0.0534314	n.s.
CCDC93	A4IFE0	22	0.00996304	0.938587	n.s.
MGAT1	Q5E9I4	9	-0.176322	0.263802	n.s.
MORF4L2	A6H7C1	4	-0.165508	0.433262	n.s.
SHROOM2	F1MCL7	6	-0.20068	0.249293	n.s.
POLR2H	F2Z4H3	5	0.24861	0.0975065	n.s.
EML4	A0A3Q1LLV8	36	0.25342	0.152376	n.s.
LRP2	F1N6H1	151	0.166894	0.623004	n.s.
PRPH	A6QQJ3;A0AAF6Z4F8	31	-0.650507	0.51491	n.s.
THOC2	F1N153;G3MZE5	31	-0.123606	0.449424	n.s.
CDK6	E1BC36	7	-0.541735	0.256146	n.s.
EHD4	E1BJV0	18	-0.266423	0.616015	n.s.
RALA	Q3ZCK2	4	-0.258988	0.349969	n.s.
RPS14	A0A3Q1MCJ7;A0A3Q1LNR2;F1MR01	5	0.0488133	0.655829	n.s.
NPM1	E1BCL3;A0AAA9RVD2;Q3T160;A0A3Q1LR94	8	-0.0131613	0.778277	n.s.
PACSIN3	A0AAA9TSI6	7	-0.260285	0.257246	n.s.
COG7	A2VDR8;A0A452DKB6	21	0.00448664	0.954583	n.s.
DOK1	Q5EA84;F1MRT5	7	0.147886	0.204233	n.s.
ZFYVE9	F1MKY4	3	-0.261911	0.352428	n.s.
BCL9L	A0AAA9T3R5	5	-0.283615	0.059358	n.s.
TKDP4	F1MNL9	6	0.198597	0.524972	n.s.
NUP153	A0AAA9TXI1	29	-0.226379	0.114953	n.s.
MYOF	F1N3I4	82	-0.236609	0.264532	n.s.
DHX32	A7MBI4	20	0.131255	0.377914	n.s.
CEP170B	G3X6H0	35	0.46616	0.15115	n.s.
PRKAR1A	P00514	6	0.121693	0.351907	n.s.
SUN1	A0AAA9U142	14	0.0974832	0.792939	n.s.
CD55	A0AAA9T3R1	5	0.0885158	0.891275	n.s.
UPF1	E1BEK9	50	0.0465379	0.416813	n.s.
HSDL2	A4FUZ6	18	-0.0238047	0.804603	n.s.
GORASP2	F1MSB5	8	-0.375295	0.10982	n.s.
THEX1	G3MZQ7;Q32LA2	7	-0.0950459	0.703885	n.s.
USP15	Q2HJE4	33	0.0640313	0.394663	n.s.
SIRT7	Q0P595	4	0.362845	0.0583347	n.s.
RIN3	A0AAA9TVZ2	12	-0.105632	0.528902	n.s.
HOOK1	E1BAT1	28	0.0240692	0.908277	n.s.
PSMC4	Q3T030	24	0.155094	0.241939	n.s.
NCBP3	E1BM89	6	-0.0932796	0.474835	n.s.
SEPTIN9	A0A3Q1MB56	21	-0.201466	0.533144	n.s.
SEPTIN7	Q6Q137	21	-0.0464161	0.754673	n.s.
ANXA8	Q95L54	22	-0.050182	0.871861	n.s.
NUP98	E1BCV4	48	-0.0682608	0.313408	n.s.
NUFIP2	A0AAA9TDA2	17	-0.367581	0.187432	n.s.
COG3	E1BGA6	22	0.10928	0.43642	n.s.
EHMT1	A0A3Q1LPD0	11	0.139404	0.37258	n.s.
SLC43A1	A0A3Q1MUY6	2	-0.339821	0.185616	n.s.
CHPF	E1BMM8	8	-0.0365674	0.859935	n.s.
PSMD9	Q3SZ19	8	-0.000263055	0.998976	n.s.
PTCD3	Q2KI62	18	-0.0641047	0.577864	n.s.
MRM2	A0AAA9SIB5	2	-0.13513	0.758735	n.s.
SSRP1	A0A3Q1MNI4	20	-0.0154262	0.396442	n.s.
NCSTN	A0A3Q1MDC6	6	0.0590092	0.623855	n.s.
BZW2	A0AAA9RSW0	14	0.160287	0.178153	n.s.
AMACR	F1MCN8	2	0.0655052	0.880451	n.s.
TRIM28	E1BJG5	19	-0.290512	0.13846	n.s.
PITPNM1	E1B9I9	16	0.418073	0.180735	n.s.
HSPA14	Q2YDD0;G3MY73	14	0.120034	0.178294	n.s.
FEM1B	F1N162	3	-0.290586	0.211244	n.s.
DHDDS	F6RWD2	9	0.18784	0.0631963	n.s.
PARL	Q2KHV4;A0A452DJF2	4	0.267912	0.0936469	n.s.
ASNS	Q1LZA3	23	0.0310384	0.895488	n.s.
TFAM	Q0II87;E1BA21	9	-0.0981627	0.38776	n.s.
ATP6V1A	A0A452DJG1;P31404	31	0.212812	0.234086	n.s.
RCN2	Q0VCQ9	13	-0.424651	0.079176	n.s.
LIMD1	G5E5X0	9	-0.0820614	0.730712	n.s.
ENPP4	A2VDP5	6	0.404057	0.176608	n.s.
ESRP2	A0AAA9S204	12	0.242602	0.2905	n.s.
LOC515333	F1MUC1;A0AAA9TUR1;A0A3Q1M6C0;A0AAA9TZ11	9	-0.696785	0.216732	n.s.
SMARCE1	F6RNR1	10	0.164854	0.110789	n.s.
TIMM8A	Q3ZBS8	4	0.214142	0.240403	n.s.
RBM26	A0A3Q1MNU7	10	-0.182103	0.0634623	n.s.
KRT7	Q29S21;A0A3Q1MKC8	30	0.516342	0.174039	n.s.
PAPSS2	A0AAA9SX99	7	0.299258	0.327821	n.s.
CCDC8	A0AAA9SDF5	5	-1.09595	0.0450904	n.s.
CNTRL	A0AAA9U0N7	3	0.00138966	0.992316	n.s.
BLOC1S4	Q0VCC3	5	-0.0747453	0.570513	n.s.
PKN1	A0AAF7AT19;A1A4I4	8	0.0358427	0.877851	n.s.
ZZEF1	A0AAA9TUR4	39	0.124641	0.175348	n.s.
ASL	A0AAA9T703;Q3SZJ0	23	-0.321413	0.189954	n.s.
COMMD10	A4FUB5	7	0.025245	0.797703	n.s.
RPS10	Q3T0F4	9	-0.0403183	0.616295	n.s.
WBP2	E1BGX4	7	0.36038	0.00174084	n.s.
SCYL1	A6QLH6;F1MVK2	16	0.0300597	0.569047	n.s.
ALKBH1	F6RQT4	4	0.0521586	0.732537	n.s.
EFNB1	A1L570	7	0.299867	0.503025	n.s.
DNAJB2	A0AAA9TVG8	4	0.276512	0.000833774	n.s.
FLNA	F1N169	103	-0.387337	0.14344	n.s.
TBC1D15	A0A3Q1MTW0	20	-0.1097	0.489437	n.s.
CAPN7	E1BIX3	17	0.0348001	0.725961	n.s.
SPATS2	F1MK70	11	-0.859846	0.167523	n.s.
MCAT	E1BPG0	15	0.188281	0.397645	n.s.
DPEP1	A0AAF7A8I1;Q3SZM7	10	-0.520152	0.618665	n.s.
SIPA1	A0AAA9TDI5	8	0.058553	0.767035	n.s.
COMMD9	Q2TBN5;F1MIC5	8	0.0455763	0.793469	n.s.
KIF13B	A0A3Q1NM85	45	0.142182	0.0867276	n.s.
MCM6	E1BH89;Q2KIZ8	34	0.0579292	0.588338	n.s.
FASN	F1N647;Q71SP7	86	-0.31897	0.220733	n.s.
KIF2C	A0AAF6DLX8	18	-0.154721	0.623006	n.s.
HNRNPUL1	F6Q807	16	0.0390863	0.883061	n.s.
DNAJC7	F1N7H0	23	0.104087	0.49983	n.s.
PTPA	Q2KJ44;A0AAA9SFG3	8	0.107576	0.171454	n.s.
LCP1	F1MYX5	6	0.371579	0.285588	n.s.
TTPA	F1N086	4	0.57955	0.166285	n.s.
ACOT2	A0A3Q1MH73;A6QQA9	4	-0.382184	0.0785728	n.s.
KLHL25	F1N592	17	0.233725	0.346233	n.s.
EP300	E1B8D6	11	0.087513	0.355637	n.s.
LOC515570	F1MF76	36	-0.0262327	0.84481	n.s.
NOTCH2	F1MPE9	20	-0.122435	0.339505	n.s.
SIGIRR	A0A3Q1LRV5	12	0.152816	0.455322	n.s.
MARCKS	P12624	4	-0.688526	0.0585751	n.s.
TBCA	P48427;A0A3Q1M6V1	10	0.000650088	0.994586	n.s.
ADNP	E1BCZ9	21	-0.173186	0.224797	n.s.
ANXA2	P04272	28	-0.267014	0.538706	n.s.
GPRC5C	Q2YDG0;A0A3Q1MJL6	4	-0.257401	0.599905	n.s.
RPS2	A0A3Q1MAT9;O18789;A0A3Q1LT23;A0A3Q1MBL4;A0AAA9S423	12	0.108448	0.276908	n.s.
ATAD2B	F1MEY1	16	0.142744	0.463289	n.s.
ADO	G3MZK0	7	-0.240164	0.024424	n.s.
DSCC1	A0AAA9S5L7	7	-0.333964	0.377358	n.s.
PCNA	Q3ZBW4	8	-0.133164	0.564855	n.s.
DYNC1LI1	Q2KII9	16	-0.242594	0.0660839	n.s.
CHURC1	Q2HJG7;A0AAA9S2T1	4	0.343397	0.0742323	n.s.
KIF23	A0AAA9SA93	23	-0.217054	0.0687351	n.s.
OSBPL5	A0AAA9SI60	6	-0.57068	0.321403	n.s.
NPC1	A0A3Q1NDF8	13	0.00107702	0.998402	n.s.
EPB41L3	E1B7S3	24	0.077476	0.676846	n.s.
MED24	A0A3Q1MN23	10	0.175283	0.245164	n.s.
CANX	A7Z066	27	-0.0578758	0.689062	n.s.
RALB	A5D977	5	-0.317969	0.446116	n.s.
P4HA1	Q1RMU3	25	-0.581975	0.440796	n.s.
DBNL	A0A452DIT4;A6H7G2	19	0.08099	0.706826	n.s.
RAB25	Q58DW6	9	0.480786	0.18635	n.s.
ARHGAP29	A7YY57	22	-0.36036	0.227205	n.s.
IGF2BP3	A0AAA9S0Y0	22	0.0101051	0.937488	n.s.
EPHX2	F6QS88	18	0.457488	0.269304	n.s.
NUDCD1	E1BLF7	18	0.0209316	0.86883	n.s.
RHOT1	Q2HJF8	6	-0.0138689	0.928372	n.s.
UBTF	A0AAA9TQ73	21	0.115338	0.25672	n.s.
PPM1F	E1BF95	15	0.0368086	0.760616	n.s.
SMC2	F1MY41	46	-0.0404596	0.764026	n.s.
ACAA1	Q3ZC41	16	0.349161	0.259489	n.s.
TBCC	Q3SZE9	11	0.0923835	0.538254	n.s.
RABEP2	A4FUG8	14	0.136649	0.432209	n.s.
DNM1L	Q2KIA5	28	0.0690557	0.642867	n.s.
PPFIBP2	A0AAA9TIW8	25	0.0831019	0.580223	n.s.
FERMT1	A0A3Q1M848	15	0.224672	0.344043	n.s.
MED9	Q2KHX9	4	0.14748	0.114617	n.s.
COG4	A0AAF6YYF2;Q3MHG0	19	0.158843	0.0907368	n.s.
C1QBP	Q3T0B6	4	-0.0762088	0.629579	n.s.
TPM4	A6QR15;A0AAA9TGF5	7	0.560107	0.0351524	n.s.
CKAP4	F1ME65	36	-0.422939	0.176592	n.s.
OGFOD1	Q3MI03	11	0.194768	0.186205	n.s.
TOP1	A0AAA9TV68	24	-0.0146743	0.946158	n.s.
KLC2	A0AAA9S260	11	-0.301786	0.170987	n.s.
HDGFL2	F1MT65	7	-0.0173109	0.90179	n.s.
MICOS13	A0AAA9TCD6	4	-0.0112393	0.944035	n.s.
CC2D1B	F1N7R5	17	0.119	0.330271	n.s.
ARHGDIA	P19803;A0A452DJ82	9	-0.0607306	0.399472	n.s.
THRAP3	A0A3Q1NI32	25	-0.211542	0.0697539	n.s.
BMS1	E1BPP2	22	-0.215892	0.0919583	n.s.
ENOPH1	Q0VD27;A0AAA9TBH1	6	-0.0586001	0.702211	n.s.
EXOSC8	Q2KHU3	8	0.0367142	0.636609	n.s.
PHF6	A0AAF6Z126;Q08DR0	4	-0.33014	0.286076	n.s.
TAF6	Q58DG7	11	-0.0724266	0.391903	n.s.
VPS13B	A0A3Q1MEI1	26	0.212159	0.325251	n.s.
ACSL6	A0A3Q1NEA4	37	0.339243	0.233741	n.s.
S100A11	A0AAA9TWM3	4	-0.345677	0.695088	n.s.
PLS1	A6H742	25	0.184489	0.769835	n.s.
ARHGEF5	F1N2G5	13	0.118881	0.664839	n.s.
MSX2	Q0P5C3	4	-0.0444964	0.827208	n.s.
FIP1L1	E1BKM0	7	-0.108755	0.519332	n.s.
SMARCD1	Q2TBN1;F1MTG9	10	-0.167006	0.16623	n.s.
BASP1	P80724	15	0.129989	0.780895	n.s.
TYMS	Q2TA32;A0AAA9TIK9	7	-0.525735	0.321338	n.s.
PRR14	A0A452DJ07;Q0VBZ8	2	0.147311	0.410564	n.s.
TUT1	Q1JPD6;A0A3Q1MNQ1	5	0.0222301	0.881828	n.s.
RRP1	Q148H9	9	-0.164908	0.204106	n.s.
AASS	A0AAF6ZWM0;A8E657	22	0.110945	0.718779	n.s.
ELP6	A0AAA9SGT2	4	-0.0558414	0.510371	n.s.
LRPAP1	A0A3Q1MD85	14	0.105321	0.609275	n.s.
ABCC5	A0AAA9SQ08;F1MZD4	10	-0.25983	0.554548	n.s.
TIMP2	P16368;F1N430	9	1.07538	0.0847726	n.s.
PXDN	A0A3Q1LMN6	55	-0.678995	0.457921	n.s.
IDE	A0AAA9U0H2;Q24K02	42	0.114357	0.231637	n.s.
RPL13A	Q3SZ90	6	0.0258231	0.78101	n.s.
PKM	A0AAA9RXQ2	32	-0.0803626	0.633575	n.s.
ABCF3	A0AAF6DM45	16	-0.0704646	0.704437	n.s.
ATAD3	A7YWC4	25	-0.0726121	0.65968	n.s.
CDK12	G5E518;E1BB50	12	-0.0983809	0.404918	n.s.
FAM120A	A0A3Q1MFI2;A6H7H1	30	-0.0810525	0.31452	n.s.
BCAM	Q9MZ08	18	0.0182374	0.959991	n.s.
AP3D1	A0AAA9ST90;Q865S1	36	0.10223	0.204956	n.s.
RPS19BP1	A6H7J2	2	-1.29563	0.00440777	n.s.
GIT1	A0A3Q1M7Q3	16	0.0148946	0.924865	n.s.
GCC2	E1BB16	49	0.129766	0.0607918	n.s.
LMNB1	A7YY47	31	-0.0584798	0.596233	n.s.
TARS1	Q3ZBV8	33	-0.110709	0.522666	n.s.
TOPBP1	A0A3Q1LWE4	16	-0.120529	0.458252	n.s.
PRRC2C	G3X6B2	36	-0.111374	0.505529	n.s.
MORC3	F1MFY1	22	0.0877088	0.655857	n.s.
RALBP1	F1MPV3	7	0.18714	0.481765	n.s.
FLNC	A0A3Q1LV98	105	0.111021	0.703238	n.s.
KIF1C	A0A3Q1N141	21	-0.0151043	0.834711	n.s.
E2F4	F1MBE6	5	0.0536494	0.603372	n.s.
TM9SF2	F1N672	13	-0.0203695	0.864707	n.s.
KLHL3	A0AAA9T372	10	-0.135058	0.456582	n.s.
ALDH18A1	Q2KJH7	27	-0.25664	0.351581	n.s.
VPS25	A0AAF6Z7J4;Q5E9A6	10	0.0344939	0.751197	n.s.
DBT	P11181	11	0.100724	0.660952	n.s.
MCM4	E1BFZ9	36	0.041238	0.636539	n.s.
POLR2A	G3MZY8	47	0.112746	0.144903	n.s.
KATNB1	A6QQU1	3	0.129281	0.758038	n.s.
EIF1AD	A0AAF6Z7A4;Q58CY2	6	-0.0345702	0.865849	n.s.
GTSF1	Q3SZU0	6	-0.63033	0.110985	n.s.
ATIC	Q0VCK0;A0AAF6Z6Q7	34	0.114483	0.490765	n.s.
MXRA5	A0AAA9S4A3	27	-0.707255	0.427878	n.s.
DCTN1	A0A3Q1LJA4	45	-0.0115703	0.887436	n.s.
ACAD10	E1BGS2	4	0.0409741	0.85912	n.s.
TBP	A0AAF6ZDS6;Q2HJ52;F1MKV5	2	-0.0252159	0.841957	n.s.
ZFPM1	F1N6T0	7	0.169371	0.479026	n.s.
EZR	P31976	29	-0.0365507	0.803032	n.s.
PDCD10	Q0VCQ6	7	0.0620198	0.577879	n.s.
RBPMS	A0AAA9SL39	5	-0.105405	0.368032	n.s.
TRIM29	E1BEZ4	20	1.92673	0.417513	n.s.
INTS10	A5PJT2	14	0.049814	0.544076	n.s.
SFPQ	E1BQ37	24	-0.0855891	0.590513	n.s.
AKAP9	A0A3Q1MK49	57	-0.110595	0.335169	n.s.
PSPC1	Q1LZD9;A0AAF6YLV5	13	0.0785823	0.731477	n.s.
PRP4K	Q08DZ2;A0A3Q1MNY8	20	0.100192	0.486798	n.s.
CCDC6	F1N091	18	-0.0324542	0.805748	n.s.
PRKDC	E1BLB6	38	0.110388	0.447312	n.s.
XPO6	F1MI29	13	0.0160049	0.942153	n.s.
SPTBN1	A0A3Q1MXU7	99	-0.301996	0.401781	n.s.
NLN	G3X795;A2VDQ5	6	-0.493789	0.1873	n.s.
SMC3	O97594;A7Z065	53	-0.0220221	0.856907	n.s.
HAUS1	Q2TBK4	3	0.145798	0.308431	n.s.
UTP11	F1N165	10	-0.126995	0.147805	n.s.
PRRC2A	E1BAF6	36	-0.270879	0.0649611	n.s.
DNAJC13	F1MDR7	71	0.0190066	0.856385	n.s.
NELFB	G5E5S2	23	-0.0738346	0.407436	n.s.
BNIP1	F1N353	7	-0.260699	0.0102037	n.s.
SMG6	E1BFK4	7	-0.145342	0.283109	n.s.
TRIM27	Q1LZA9	8	-0.256145	0.0614275	n.s.
SSB	P10881	24	-0.0708049	0.72356	n.s.
PPP4R1	A0AAA9T691	25	0.313958	0.0357721	n.s.
RPS3	Q3T169;A0AAA9TQX8	15	0.100954	0.224789	n.s.
STRN	A0A3Q1MGW7	19	0.118915	0.395532	n.s.
PLOD1	G8JKV7;O77588	23	-0.550787	0.498085	n.s.
SMPD2	F1N588	9	0.107782	0.385306	n.s.
ZFHX3	E1BPV9	8	0.500082	0.0852407	n.s.
RUFY1	A0AAA9S3N9	9	0.123408	0.300094	n.s.
PSMD11	Q2KI42;A0A3Q1MDI3	23	0.0637272	0.604088	n.s.
SHCBP1	E1B738	15	-0.164082	0.493127	n.s.
EXOC2	E1BDW9	21	-0.0318244	0.779693	n.s.
MON2	A0AAA9T6Y7	32	0.0881303	0.604395	n.s.
DCAF1	A0A3Q1LW88	27	-0.103957	0.371296	n.s.
NASP	A0A3Q1M1D3;Q2T9P4	30	-0.0467318	0.646061	n.s.
TPD52L1	Q0VBY4	6	0.179132	0.510775	n.s.
SIN3A	F1MTR3	23	-0.0725825	0.663686	n.s.
ACSS2	A0A3Q1MB37	16	0.20394	0.531908	n.s.
ALDH6A1	Q07536;F1N7K8	19	0.0472016	0.84946	n.s.
DIAPH1	A0A3Q1LUD9	35	0.0959779	0.258204	n.s.
CEBPZ	F1MHM7	29	-0.117905	0.188136	n.s.
LSG1	A0A3Q1MV30;Q2YDM7	14	-0.041309	0.841536	n.s.
TSEN2	A0A3S5ZPE3	3	0.240711	0.212334	n.s.
CWF19L2	F1MR62	19	-0.0660764	0.321794	n.s.
CCZ1	Q0VD30	14	0.0581057	0.628527	n.s.
SCPEP1	Q2NKZ9	9	0.195627	0.631362	n.s.
ATP13A1	F1MYA8	33	-0.0364703	0.816284	n.s.
ARID2	F1N463	8	-0.0619678	0.563296	n.s.
GATM	Q2HJ74	20	-0.751544	0.417476	n.s.
KBTBD8	A0AAA9TU80	9	-0.0768007	0.58733	n.s.
BCAP31	Q5E9F1	11	-0.0643905	0.768629	n.s.
ARPC4	Q148J6	6	0.270034	0.107983	n.s.
IGF1R	G1K218;Q05688	11	0.142073	0.71142	n.s.
KLHL11	A0A3Q1M7U1	5	0.192799	0.263719	n.s.
TM9SF4	A5D7E2	12	-0.08051	0.384506	n.s.
HEXIM1	Q0X0C4	6	0.243123	0.311829	n.s.
LPCAT4	A0AAA9SAW2	12	0.0710437	0.815564	n.s.
TRAM1	Q9GKZ4	5	-0.188849	0.322061	n.s.
LRPPRC	A0AAA9SR44	67	-0.108538	0.571338	n.s.
THADA	F1MV18	33	-0.157874	0.505589	n.s.
NSF	A0A3Q1MR04	32	0.235558	0.30364	n.s.
MICAL2	F1MF74;A0A3Q1MTT2	9	0.628206	0.182239	n.s.
OTUD4	E1BN58	4	-0.238616	0.407826	n.s.
SLC35B2	Q3ZBB0	9	0.0706409	0.685659	n.s.
ADI1	A0AAA9S8H4;Q3ZBL1	11	0.23995	0.144636	n.s.
GATAD2A	A0A3S5ZPD8	17	-0.186892	0.245731	n.s.
RTN4	F1N405	14	-0.0244511	0.870232	n.s.
MTMR6	E1BJH8	22	-0.0301237	0.750683	n.s.
IARS1	A7MBC5	48	-0.0260644	0.851722	n.s.
DIABLO	A0AAA9T9X9	3	0.300343	0.260831	n.s.
FOLR1	P02702;A0A3Q1MRP4	8	0.610717	0.405201	n.s.
EIF3B	A7MB16	33	0.0655732	0.500506	n.s.
LPGAT1	A0A3Q1LJ78	6	0.293431	0.481685	n.s.
CHORDC1	Q29RL2	12	-0.0942602	0.784339	n.s.
ILF3	F1MMA0	27	0.00651169	0.928384	n.s.
BUB1B	F1MWP1	17	-0.128037	0.602196	n.s.
OGFR	F6RA54	8	0.0527828	0.678015	n.s.
CPSF1	Q10569;A0A3Q1MKB1	29	0.0774743	0.520374	n.s.
PLSCR3	A0AAA9RZG2	3	-0.0831669	0.820122	n.s.
USP47	A0A3Q1NK97	33	-0.0650064	0.565364	n.s.
LRRFIP2	E1BBW0;Q2T9W6	9	0.0748847	0.688383	n.s.
IGF2BP1	E1BKJ7	22	-0.323493	0.171493	n.s.
PARD3	A0A3Q1MT26	20	-0.000963211	0.991567	n.s.
SNX29	Q08DX0;A0A3Q1N0T4	4	-0.539915	0.479189	n.s.
OGDH	Q148N0;A0AAF6YPM1	38	-0.0364701	0.667094	n.s.
PRAG1	A0A3Q1MBQ1	8	0.106251	0.115914	n.s.
STOML2	Q32LL2;A5PJA6	15	0.0701167	0.638464	n.s.
TJP3	A0A3Q1MSB9	16	0.309828	0.325683	n.s.
LUC7L	F1MMH3	6	-0.252671	0.107139	n.s.
TJP2	A0A3Q1MPV5	48	0.34592	0.250485	n.s.
PRPF40A	A0A3Q1MF35	17	0.176891	0.457658	n.s.
FANCA	A0AAA9TBU1	3	0.123829	0.624439	n.s.
SP2	A0AAA9S4T0;Q5E9U0	2	-0.61364	0.143619	n.s.
RMDN1	Q32KL4;A0AAA9T0I3;F1MFW0	9	0.273769	0.222056	n.s.
CCDC174	A0AAA9T157	2	-0.241603	0.449508	n.s.
DPY19L1	F1N3H6	6	-0.148294	0.850512	n.s.
USP10	A5PJS6;A0AAF6YU44	15	0.0531939	0.67898	n.s.
SLC9A6	A7MB44;A0A3Q1M7D5	3	-0.226093	0.417923	n.s.
LRBA	A0A3Q1MGD3	55	0.377325	0.133049	n.s.
KDM5C	F1MYV2	14	-0.11227	0.203527	n.s.
PUS10	F1MRD5	17	0.255204	0.48399	n.s.
LOC112445002	A0AAA9SRZ1;A0A3Q1ML81	5	0.0676179	0.742429	n.s.
WDR55	Q58DT8	8	-0.0557554	0.715158	n.s.
MTAP	Q3MHF7;A0A3Q1LUB3	19	-0.763937	0.0119504	n.s.
PIGN	E1BM45	6	-0.081719	0.434842	n.s.
PLS3	A7E3Q8	5	-0.353771	0.358325	n.s.
TFCP2L1	A0A3Q1LGL9	10	-0.069118	0.793046	n.s.
SYNJ1	A0A3Q1MIH5;O18964	22	0.328997	0.0617108	n.s.
TPR	A0AAA9T4R9	86	0.0787013	0.491976	n.s.
HMMR	F1N331	17	-0.0973803	0.679779	n.s.
PDE5A	Q28156	13	-0.637302	0.142193	n.s.
GPS1	A0AAA9S1F3	17	0.0226135	0.88811	n.s.
DPP3	A0AAA9T7D8	28	0.334959	0.070132	n.s.
SLC17A5	E1B7R3	3	0.29921	0.194773	n.s.
SCAF4	A0A3Q1MTL1	5	0.0142946	0.906189	n.s.
DMAP1	Q1LZ99	8	-0.0502955	0.593831	n.s.
SARS2	A0AAA9SXU5;Q9N0F3	19	0.0327649	0.748169	n.s.
CHD1	A0A3Q1LUM8	18	-0.0630343	0.305069	n.s.
SEH1L	A7YY75	16	0.0713234	0.344981	n.s.
UBA3	A0A3Q1M200	13	0.117883	0.318015	n.s.
TDRD3	A0A3Q1M8A8;Q2HJG4	6	0.137562	0.417559	n.s.
MPRIP	A0A3Q1LSA5	23	0.0718727	0.580165	n.s.
PIP5K1A	A6QLC5	5	-0.312556	0.163817	n.s.
OPTN	Q3ZC32	11	-0.12199	0.28239	n.s.
GET4	Q0P5I8	10	0.106242	0.29761	n.s.
SF3B3	A0JN52	41	0.0361772	0.798744	n.s.
BBOX1	F1N4U6	10	0.601822	0.492616	n.s.
APRT	A0A452DIE3;Q56JW4	8	0.346933	0.0871373	n.s.
BZW1	F1MZK4	15	-0.0115296	0.94552	n.s.
SYMPK	E1BJF6	23	0.0781658	0.219235	n.s.
EIF4A1	Q3SZ54	14	0.036073	0.599366	n.s.
GARS1	A5D7A2	26	-0.0176481	0.825042	n.s.
THOC5	A4IFQ0;F1MS93	16	-0.126195	0.347663	n.s.
GHITM	Q3SZK3	6	0.0637603	0.734373	n.s.
ANKHD1	A0A3Q1M7L2	25	-0.0403622	0.750737	n.s.
UBR3	F1MQK6	17	0.105555	0.27616	n.s.
RABGAP1L	F6QEG6	17	0.0466723	0.73741	n.s.
FAM20C	F1MXQ3	4	0.115308	0.713492	n.s.
TSR2	Q3T090;A0A452DIP4	2	-0.0017883	0.992545	n.s.
AASDHPPT	A0A3Q1LL63;G3MZI2	13	-0.136165	0.638414	n.s.
LPIN3	E1BLQ9	5	-0.0310547	0.876445	n.s.
ENPP1	F1MNS5	17	0.223519	0.636142	n.s.
ZNF800	E1BPK3	5	-0.0833217	0.642188	n.s.
RAB34	A0A3Q1LX70	4	-0.359649	0.199859	n.s.
GMIP	A0AAA9SMC0	6	-0.0115244	0.937626	n.s.
RDX	Q32LP2	21	0.0160942	0.917086	n.s.
OCRL	A0AAA9U0Y4	18	-0.127474	0.422111	n.s.
TTI1	A0JN42	9	0.0682261	0.610846	n.s.
ADCK5	A0AAA9SJ96	5	0.897964	0.0352847	n.s.
ANKLE2	A0A3Q1LKM4	29	-0.113136	0.293394	n.s.
NAA15	A0AAA9RY84	30	-0.0246817	0.874035	n.s.
LTF	P24627	33	0.46452	0.657679	n.s.
MKRN2	Q2YDI8	8	0.00503612	0.974828	n.s.
CHCHD3	Q5E9D3	11	0.12992	0.416173	n.s.
PTGES	Q95L14	3	0.379913	0.807594	n.s.
CDC42BPB	E1BP72	27	-0.0706601	0.579926	n.s.
RBM27	A0A3Q1NNK5	9	0.0957963	0.216325	n.s.
ARRB1	P17870	6	-0.399123	0.0976347	n.s.
HIBCH	Q2HJ73;F1MPK4	12	0.0406914	0.730734	n.s.
ABHD1	Q3T0A0	2	-0.0258849	0.948041	n.s.
YARS1	Q29465;F1MHM5	34	0.104285	0.50205	n.s.
SNX16	A0A3Q1MTG5	7	0.661031	0.00606518	n.s.
ATP2C2	A0AAA9TAU7	26	0.252378	0.457198	n.s.
TUBGCP4	F6QIZ6	11	-0.0616252	0.321051	n.s.
TREX1	F6QB70;Q9BG99	3	0.368135	0.385752	n.s.
NRDC	A0A3Q1LY70	28	-0.0733175	0.718681	n.s.
DOHH	Q0VC53	10	0.0449268	0.87288	n.s.
SPAG9	A0A3Q1LP94	30	0.127846	0.14966	n.s.
PPP1R13L	F6RNH4	22	-0.599468	0.181953	n.s.
MRPS23	A0A3Q1M7M3;Q2NL27	8	-0.004474	0.967142	n.s.
LNPEP	A0A3Q1LSE7	26	0.168845	0.653234	n.s.
NDUFB10	Q02373	8	-0.066783	0.705819	n.s.
TLK2	A0AAA9TNE6	4	0.0230634	0.831713	n.s.
FAM3A	A0A3Q1LQA4	5	0.0205092	0.877148	n.s.
APAF1	A0A3Q1LZZ2	10	0.171304	0.364582	n.s.
TXNRD2	Q9N2I8	10	-0.052393	0.770913	n.s.
ACLY	Q32PF2	41	-0.41976	0.169897	n.s.
CELSR1	F1N6Y9	22	-0.015252	0.893937	n.s.
ENTPD3	A0A3Q1MDD8	5	0.292868	0.813393	n.s.
ORC1	A0AAA9SV06;Q58DC8	10	-0.204715	0.301596	n.s.
OLA1	A0A3Q1LZU5;Q2HJ33	19	-0.093708	0.516443	n.s.
CHD7	E1BPM4	22	0.0970979	0.436139	n.s.
CDK5RAP2	A0A3Q1MVZ6	11	-0.148621	0.144428	n.s.
ECE1	P42891	11	-0.14282	0.818388	n.s.
PEG3	A0A3Q1LMU6;Q6H236	35	-0.617426	0.101235	n.s.
SLC2A3	A2VDL2;P58352	8	-0.772748	0.198037	n.s.
ORC4	Q2YDI2	7	-0.0925497	0.37338	n.s.
NT5E	Q05927;A0A3Q1MCG3	17	-0.63641	0.633744	n.s.
LLGL2	A0AAA9SWS7	34	-0.0144188	0.907904	n.s.
PCCB	A0A3Q1LPE3;Q2TBR0	20	-0.223585	0.364915	n.s.
LMO7	A0A3Q1M7E1	58	0.411924	0.265309	n.s.
SGPL1	A5D788	15	0.177626	0.194748	n.s.
CRTC3	F1N1Z3	2	-0.220453	0.333526	n.s.
TRAFD1	Q58D05	9	-0.104371	0.80139	n.s.
METTL13	A5PK19;A0AAF6Z482	26	-0.0491581	0.810566	n.s.
ARHGAP5	E1BM23	23	-0.238797	0.471769	n.s.
NPEPPS	E1BP91	38	0.0688354	0.369515	n.s.
ST14	A0AAA9SRJ3;Q0IIH7	19	0.0694791	0.764024	n.s.
MET	Q769I5;Z4YHD9	32	-0.293879	0.255295	n.s.
PADI2	A0AAA9SRB9	15	0.241948	0.83974	n.s.
PICK1	A0A3Q1MC64;Q2T9M1	3	-0.123381	0.562558	n.s.
OTUB1	Q3T0Y1	13	0.0502451	0.684195	n.s.
DHRS9	Q8HYR6	14	0.884805	0.344171	n.s.
DAB2	A0A3Q1LSX5	19	0.16702	0.556222	n.s.
SRSF3	Q3SZR8;A0AAA9SK06	5	0.087242	0.645452	n.s.
XYLB	A0A3Q1LRL7;Q3SYZ6	6	0.0507562	0.786678	n.s.
TCP1	Q32L40;G5E531	27	-0.13615	0.434975	n.s.
TRIP4	F1N1K2	8	-0.178429	0.253652	n.s.
ACBD3	F1MRE5	19	0.109096	0.555999	n.s.
ATP2B4	D3K0R6;F1MQ01	18	-0.221	0.463917	n.s.
MED27	Q2TBN7	5	-0.0209962	0.843135	n.s.
ARHGEF1	E1BG38	24	0.0063502	0.941933	n.s.
NAALAD2	A0AAA9TAD7	26	-0.429746	0.244716	n.s.
COMT	F1MMK0;A7MBI7	14	0.122836	0.425659	n.s.
QARS1	Q3MHH4	35	-0.0502132	0.663087	n.s.
ATP6V0D2	Q2KJB6	5	0.695518	0.368367	n.s.
ERMP1	F1MI95	20	-0.193892	0.546099	n.s.
EFTUD2	A4FUD3;F1N6D5	37	-0.0431798	0.432629	n.s.
NDC80	E1BF82	11	-0.216273	0.197908	n.s.
TBL2	Q0P5H6	17	0.0222551	0.866588	n.s.
EIF3A	A0AAA9S6A7	59	0.0326538	0.736275	n.s.
MRPL39	Q05B74	15	-0.146824	0.260826	n.s.
TRAP1	Q2TBI4	32	-0.13814	0.0296666	n.s.
PTGES2	Q66LN0;A0A3Q1LFK5	12	0.071035	0.658737	n.s.
WWP2	A0A3Q1NIL1	3	0.0324219	0.745482	n.s.
OGT	A0A3S5ZPK0	30	-0.0120886	0.933684	n.s.
THUMPD1	Q24K03;A0AAF6ZNP5	10	0.0467788	0.661009	n.s.
GALK1	A6H768;A0AAA9TPL4	14	-0.167225	0.290507	n.s.
SLC3A2	Q08DL0	17	-0.202126	0.687958	n.s.
MPG	F1MKN2	8	0.0127801	0.900808	n.s.
TRAPPC12	A6QLC8	11	-0.207342	0.187217	n.s.
RPL34	F1ML72;A0AAA9SX40	4	0.0928806	0.348433	n.s.
VCPIP1	A0AAA9T9Z2	21	0.0829519	0.303388	n.s.
CHAMP1	A0AAA9SEB0	9	-0.250879	0.137374	n.s.
PLD3	Q2KJJ8	10	0.111161	0.336438	n.s.
NKTR	E1BJT5	5	-0.427837	0.520377	n.s.
SZT2	A0AAA9TLH2	4	0.122911	0.614335	n.s.
LONP1	Q59HJ6;A0AAA9S896	31	0.00607379	0.950627	n.s.
TOR2A	A4FUH1;P0C7W1	3	-0.0309875	0.851488	n.s.
FAH	A5PKH3;F1MYZ7	6	0.401007	0.388418	n.s.
MIA2	A0A3Q1MUH0	29	0.0202896	0.871169	n.s.
IBTK	A0A3Q1MJU3	16	-0.14538	0.479704	n.s.
INTS5	A1L552	9	-0.129398	0.520816	n.s.
RAB10	A6QLS9	4	-0.00889603	0.961428	n.s.
IQGAP2	A0AAA9TLU6	56	-0.656468	0.413878	n.s.
CDCP1	G3N093	15	-0.084265	0.738999	n.s.
RNF145	F1MGV3	7	-0.00709701	0.976448	n.s.
MBD3	A0AAA9T4U1	9	-0.0584259	0.441514	n.s.
RBM19	A0AAA9TXU2	18	-0.0799956	0.556013	n.s.
HSPH1	Q0IIM3	41	-0.0621187	0.862299	n.s.
VAMP7	A0AAA9SMQ2;Q17QI5	8	0.0133578	0.901485	n.s.
SYNRG	F1MI41	19	0.161827	0.124968	n.s.
NDUFAF6	A7YVD7	6	0.0143487	0.892258	n.s.
MCM3AP	E1BJE7	14	0.0235119	0.874057	n.s.
SLC25A20	Q3SZA4	8	0.495612	0.377696	n.s.
DIS3L2	E1B7R0	16	-0.0659154	0.596917	n.s.
METTL26	A0AAF6YK97;Q32KX8	9	0.157547	0.461646	n.s.
UQCRQ	A0AAF6Z5L4;P13271	4	-0.124526	0.54173	n.s.
PRRT4	G5E6N2	6	-0.114734	0.826067	n.s.
CUL3	A0AAA9T669	34	-0.00751781	0.954376	n.s.
LANCL2	A0AAF6DMH4	17	0.0933022	0.366626	n.s.
LANCL1	F1MVX2;A0AAF6Z0W3	13	-0.0462561	0.711328	n.s.
MTRR	F1MGP5;Q4JIJ2	5	-0.031842	0.669692	n.s.
FLT1	A0AAA9SN20	4	-0.708645	0.263939	n.s.
BAIAP2	Q5EAD0	19	-0.259796	0.4395	n.s.
DDR1	A0AAF6DMB3	5	-0.0283868	0.915329	n.s.
ARHGAP18	A0AAF6DLS1	11	-0.333949	0.384017	n.s.
ZNF451	E1BGM1	11	-0.247404	0.111161	n.s.
SSH3	F1MI92	13	0.0651884	0.602078	n.s.
KDM6A	G3N2E9	13	0.271122	0.107477	n.s.
IKBIP	A2VE53;A0AAA9RXF3	22	-0.220109	0.594858	n.s.
UBR7	A3KMX6	12	0.0869381	0.399449	n.s.
MAP3K4	A0AAA9SKK8	17	0.00723823	0.96008	n.s.
MMP2	Q9GLE5;F1MKH8	12	-0.178277	0.907388	n.s.
XRCC5	A7MBA7	16	0.0727255	0.554757	n.s.
BCO2	F1N2Z9	11	0.187574	0.564602	n.s.
HSPA4	E1BBY7	42	-0.00271273	0.990135	n.s.
UBXN1	Q32KW2	7	0.0768476	0.619893	n.s.
MGA	A0AAA9SHD9	26	-0.208677	0.0877611	n.s.
PTPN9	F1N6W1	8	-0.0440723	0.927829	n.s.
PFAS	A0A3Q1M913	36	-0.0519301	0.850917	n.s.
CRYBG3	G3MZ11	5	0.27631	0.469517	n.s.
GPRC5B	Q1JPD9	3	-0.628401	0.227934	n.s.
SEC61A2	Q2KHX4	2	-0.2789	0.0740761	n.s.
SEC61A1	Q5EA68	5	-0.0663385	0.575649	n.s.
EOGT	A0JND3	13	0.067366	0.914792	n.s.
ZNF24	E1B7S7	5	-0.118905	0.590443	n.s.
RANGAP1	F1MFD5	24	0.0834745	0.658259	n.s.
CIZ1	A0AAA9RYD6	3	0.0392662	0.830094	n.s.
IDI1	Q1LZ95;A0A140T853	14	-0.090505	0.689228	n.s.
G3BP2	F6R199	13	-0.249647	0.0770698	n.s.
SRSF7	Q3T106;A0AAF6ZBD7	7	0.0555061	0.700908	n.s.
PTPN13	E1BKT4	35	0.00212018	0.986915	n.s.
NAA20	E1B843	6	0.0893176	0.412196	n.s.
CLASP2	A0AAA9SFG5	30	-0.204782	0.136716	n.s.
TP53I3	A0AAF6DM90	5	0.506758	0.366911	n.s.
VIPAS39	A0A3Q1M8C6;A5D796	13	0.0261273	0.820579	n.s.
ACADM	Q3SZB4	13	0.0689403	0.722449	n.s.
ESD	A0A3Q1MAU7;Q08E20	9	0.0412836	0.7442	n.s.
TGFBRAP1	A0AAA9TU88;A7MB11	3	0.0441031	0.879727	n.s.
ZNF384	F1MGZ7	5	0.0342455	0.814676	n.s.
ACOX1	Q3SZP5;A0AAA9S704	22	0.0671814	0.90191	n.s.
LZTR1	E1BLW3	2	0.279907	0.107967	n.s.
ANAPC1	A0A3Q1N0U6	27	0.0284643	0.672502	n.s.
TFRC	A0AAA9U1C1	18	-0.410897	0.317298	n.s.
RTCA	Q2HJ88	11	0.069814	0.544707	n.s.
PLA2G15	Q8WMP9	13	0.385413	0.505759	n.s.
HSD17B12	F6RBM0;Q5E9H7	15	0.0364181	0.868161	n.s.
SLC12A9	E1BLP2	9	0.140373	0.362803	n.s.
BCR	A0A3Q1M4M7	10	-0.0621904	0.667008	n.s.
DDI2	A0AAA9S0B0	13	0.24648	0.107066	n.s.
FAM234A	A0AAF7A8K4;Q2HJE5	9	-0.254715	0.30613	n.s.
VPS45	F1MDA6	14	0.00643158	0.966371	n.s.
ROCK2	A0A3Q1MW77;Q28021	34	-0.0873666	0.278807	n.s.
TIAM1	A0AAA9TPI4	8	0.227172	0.336873	n.s.
MRPL28	A0A452DJJ7;Q2HJJ1	8	-0.0971382	0.589459	n.s.
RFT1	E1BNC6	2	-0.0159414	0.915423	n.s.
UPF2	F1MQ83	20	-0.0235821	0.667327	n.s.
ARAP1	F1MHU2	26	0.0420628	0.452909	n.s.
FZD6	F1MP23	6	-0.0341025	0.771107	n.s.
KDM5A	A0AAA9SX17	4	0.979904	0.135899	n.s.
ODR4	F1N582	13	0.072873	0.541876	n.s.
KIF1B	A0AAA9SS56	14	-0.062942	0.618011	n.s.
KIF1A	A0A3Q1M6P0	4	-0.53607	0.353117	n.s.
PSME2	Q5E9G3	12	0.246078	0.28232	n.s.
CRTAP	E1BJ75	11	-0.807284	0.180364	n.s.
FIGNL1	A0AAA9S319	4	-0.0381021	0.882126	n.s.
OAT	F1MYG0;Q3ZCF5	18	-0.283681	0.0391281	n.s.
IGFBP7	F1MPP2	6	-0.676683	0.208629	n.s.
ALDOA	A0A3Q1NGQ6	7	0.0958595	0.489545	n.s.
PCNP	A0A452DIL1;Q32PF3	6	-0.0658867	0.756605	n.s.
DGUOK	Q2KIN2	3	-0.010477	0.951999	n.s.
CCT2	Q3ZBH0	34	-0.0380031	0.838259	n.s.
ANKRD17	F1MI56	17	-0.088568	0.14089	n.s.
NFKB1	F1MKW9	13	0.00593368	0.947957	n.s.
TRADD	Q2KI74	7	0.164841	0.443958	n.s.
OSBPL1A	E1BLV1;A0A3Q1MW81;A0A3Q1M0E7	26	0.409571	0.0854824	n.s.
UBR1	E1BIW0	44	0.165179	0.235274	n.s.
DDAH2	Q3SX44	7	-0.648749	0.0993461	n.s.
MDH2	Q32LG3;A0AAF6YTP4	19	0.0367004	0.845456	n.s.
RPLP0	Q95140;F1MDN4	11	0.174084	0.10706	n.s.
WLS	A0AAA9SG68	6	-0.576011	0.248657	n.s.
EPG5	A0A3Q1LTM3	22	0.0863558	0.522674	n.s.
CEBPD	O02756	3	0.100857	0.684323	n.s.
LOC112445612	G3X7Y5;A0A3Q1N5M8	3	-0.700525	0.418016	n.s.
COMMD5	Q5E9K1	3	0.107301	0.540094	n.s.
XXYLT1	Q1RMU6;A0AAA9S0D2	5	0.0192409	0.85498	n.s.
NFKB2	A0AAA9T421	11	0.176623	0.661753	n.s.
DHODH	A0AAA9TN03;Q5E9W3	15	0.00326975	0.987444	n.s.
TMEM160	Q24JY6	2	0.167973	0.453183	n.s.
SLAIN2	Q3MHV6	14	-0.054239	0.772448	n.s.
GLB1	Q58D55;A0A3Q1NDQ7	12	0.334684	0.356453	n.s.
OBSL1	E1BNH9	3	-0.493857	0.527709	n.s.
NUP210	F1MPW7	38	0.102606	0.81028	n.s.
ADAMTS1	A7MB07	7	-0.806232	0.350972	n.s.
TXNL1	A0AAA9SQ31	14	0.0316313	0.722748	n.s.
MICU2	A0AAF6DLX3	9	0.0271241	0.879152	n.s.
RAD54L2	E1BEK4	7	0.064467	0.598794	n.s.
DMXL1	A0A3Q1NC20	30	-0.0184893	0.943676	n.s.
DUS1L	G3N340	3	-0.1232	0.625819	n.s.
NEU1	A6BMK7	10	0.00159772	0.997481	n.s.
KDM1B	A0A3Q1LGR3	8	0.0188036	0.910458	n.s.
ZNF512	A4FV61;A0AAF6ZBL8	10	-0.396384	0.290482	n.s.
OPLAH	A0A3Q1LQE0;Q75WB5	19	0.181394	0.271383	n.s.
RCN3	Q2KJ39;A0A3Q1NEH4	11	-0.868739	0.277707	n.s.
SCRIB	A0A3Q1LUY1	20	0.00602452	0.955998	n.s.
EMILIN2	A0A3Q1LL18	40	-0.682895	0.459426	n.s.
ETFB	Q2TBV3	10	0.0167994	0.899379	n.s.
HDGF	Q9XSK7	13	-0.107086	0.533687	n.s.
GTF2B	Q2KIN8;F2Z4J6	14	0.130144	0.284946	n.s.
PEX13	Q0P5B1;A0AAF6YN83	2	-0.117962	0.687051	n.s.
C3H1orf50	A0AAA9S6E2	7	-0.107271	0.688251	n.s.
TM9SF1	F1MCZ2;A4IFE9	10	-0.12887	0.326523	n.s.
CTH	Q58DW2;E1BNH2;A0A3Q1M2L1	18	-0.10014	0.771953	n.s.
CARM1	A0A3Q1MWG1	13	0.182519	0.159318	n.s.
YBX3	A0A3Q1LIJ0	5	-0.369075	0.356609	n.s.
QSOX2	E1BBS6	18	-0.055595	0.722323	n.s.
PXN	A0AAA9SQ71	15	-0.231935	0.0165708	n.s.
HARS1	A0AAA9U239;Q2KI84	10	-0.194757	0.382932	n.s.
KIF21A	A0AAA9S5G5	14	-0.0690039	0.634711	n.s.
GPT2	A0AAA9TCH2	12	-0.0857819	0.787931	n.s.
NME7	Q5E9Y9;A0AAA9U2I0	8	-0.0059166	0.965595	n.s.
STAM	A0AAA9SD62	6	-0.111438	0.275656	n.s.
RTKN	F1MS34	14	-0.644035	0.269896	n.s.
MRPL58	Q3T116	4	-0.0741577	0.596482	n.s.
RPS18	A0A3Q1MQW8;Q3T0R1	10	0.102308	0.288044	n.s.
TOP2A	F1MDU7	51	-0.140161	0.638417	n.s.
PALS2	F1MU05	16	0.100651	0.841247	n.s.
LRRC66	E1BQ13	6	0.0865277	0.84594	n.s.
ECPAS	A0A3Q1LRQ5	43	-0.0403903	0.784379	n.s.
PIGO	E1BPZ8	9	-0.115192	0.238202	n.s.
GOLGA2	A0A3Q1LTM9	29	0.079754	0.363872	n.s.
ACBD5	A0A3Q1MY50;P07106	10	-0.17137	0.0726581	n.s.
MYLK	Q28824;A0AAA9SS38	7	-0.516193	0.059001	n.s.
MANBA	A0A3S5ZPJ9;Q29444	21	0.407157	0.435143	n.s.
UCKL1	E1BP85	7	0.0284999	0.739183	n.s.
ECT2	F1MJ58	20	0.0301981	0.893004	n.s.
KIDINS220	A0A3Q1MAP2	10	-0.270669	0.259272	n.s.
LOXL3	E1BFC8	4	0.155895	0.243631	n.s.
MSH6	E1B9Q4	41	-0.140594	0.173658	n.s.
ZNF638	A0AAA9TB71	39	-0.0346869	0.804362	n.s.
DNAJC11	Q2NL21;A0AAA9RZQ8	15	0.0600166	0.798993	n.s.
USP7	A0AAA9S7W6	39	0.0136482	0.834841	n.s.
XIAP	G3MWG5	9	-0.236483	0.416313	n.s.
BRAF	A0AAA9T2F0	5	0.224911	0.354181	n.s.
HES1	Q3ZBG4;A0AAF6YGT8	2	0.103621	0.646098	n.s.
BUD23	Q58DP0;A0A452DIR9	5	0.0292466	0.898659	n.s.
MTTP	P55156;F1MDA1	35	-0.626982	0.617741	n.s.
METTL9	Q0VCJ8;A0AAA9STE5	4	-0.483098	0.300541	n.s.
NAT10	F1MPG7	38	0.0678374	0.429457	n.s.
PTPN6	A0A3Q1M739;F1N376	25	0.587634	0.416364	n.s.
RCC2	A6QL85	19	0.0560886	0.713126	n.s.
SYNGR1	A0AAA9TPD3	2	0.043692	0.847499	n.s.
PAXBP1	F1MBJ4	17	0.0351658	0.658184	n.s.
OXCT1	Q24JZ7	11	-0.475	0.0517916	n.s.
COTL1	Q2HJ57	10	-0.0115589	0.967106	n.s.
EIF2S3	Q2KHU8;A0A3Q1M1J7	17	0.124738	0.0772913	n.s.
POLR1G	F6QVL1	9	-0.0482357	0.702006	n.s.
LRATD1	Q3ZCA1	7	0.472159	0.277191	n.s.
XPO5	A0A3Q1ME79	35	-0.0902127	0.627369	n.s.
PRPF38B	G3N166	11	-0.0285118	0.850355	n.s.
PPTC7	E1BEW5	7	-0.02987	0.855755	n.s.
SPCS2	E1BEI2	8	0.0594856	0.655975	n.s.
AFG2A	A0AAA9RXI8	8	0.0891774	0.405895	n.s.
TRAPPC4	Q2TBL9	8	0.0447915	0.787839	n.s.
GCLC	A0A3Q1MN33	22	-0.307998	0.20989	n.s.
P4HA2	G3N2F2	15	-0.81047	0.229533	n.s.
NDUFV3	A0A3Q1N7L1;P25712	14	-0.0260258	0.852172	n.s.
PSMB1	G5E589;Q2TBX6	12	0.0550693	0.151789	n.s.
PPP1R9A	A0A3Q1LTT3	18	0.47813	0.380072	n.s.
EPN2	F1MYK3	7	-0.3214	0.105281	n.s.
LMF2	A1L504;A0AAA9RV78	6	-0.138856	0.533072	n.s.
ARMC6	A0A3Q1NCV1	6	-0.000357469	0.998405	n.s.
SMARCC1	G3N0H4	18	-0.0414734	0.793923	n.s.
RPA1	Q0VCV0	22	0.0523755	0.352613	n.s.
SCIN	Q28046;F1MCZ3	25	-0.415624	0.316071	n.s.
SCCPDH	Q3T067;F1MX05	8	0.033517	0.919811	n.s.
ASMTL	G3MY50	8	-0.014897	0.921084	n.s.
HCFC1	E1BGF3	30	-0.167309	0.071052	n.s.
CXHXorf38	G3X6Y2	6	-0.23553	0.106298	n.s.
CYBC1	Q3SZM3	3	0.25554	0.0311426	n.s.
GAA	A0AAF6Z2G3;Q9MYM4	22	0.98698	0.090226	n.s.
CTSB	P07688	19	0.465877	0.344052	n.s.
YARS2	A5D7G0	11	-0.030591	0.773966	n.s.
PAM16	F2Z4I9	4	0.388512	0.54043	n.s.
USP19	F1MUD4	21	-0.158326	0.298782	n.s.
ENPP5	F1N5W4	9	0.824184	0.480905	n.s.
MAN1A2	E1BI49	9	-0.0516968	0.810493	n.s.
FBP1	Q3SZB7	14	1.34137	0.238863	n.s.
GATB	F6QL75	6	-0.166861	0.486897	n.s.
MCM7	Q3ZBH9	37	-0.0655058	0.458349	n.s.
ST6GALNAC2	A0A3Q1LRX1	5	-0.0672212	0.816842	n.s.
NCDN	Q2KJ97	16	0.121287	0.468093	n.s.
ACAT1	A0AAF6YY96;Q29RZ0	15	-0.156506	0.112794	n.s.
AHCY	Q3MHL4	23	-0.326602	0.177917	n.s.
CUL1	A0A3Q1M2H6	29	0.147228	0.243908	n.s.
MCM5	Q0V8B7;A0AAA9TCV3	36	0.0728779	0.398888	n.s.
RRBP1	F1MDC1	43	-0.130336	0.395478	n.s.
MCM2	A0AAA9SSL6	33	0.048954	0.580963	n.s.
RPL10A	Q5E9E6;G3X7N2;A0AAF6Z704;A0AAA9TZ19	9	-0.0226288	0.792327	n.s.
SLC25A13	F1MX88	18	0.171475	0.241105	n.s.
TRIM56	A0AAA9SZH9;E1BD59	17	0.219876	0.262962	n.s.
DPP8	F1N1L4	8	0.362435	0.00553262	n.s.
DPP9	A0AAA9TGY1	13	0.114638	0.526085	n.s.
TOMM70	Q08E34	23	-0.0233291	0.809112	n.s.
SALL4	E1BJZ5	12	-0.648822	0.156752	n.s.
MAN2A2	A0A3Q1LI72	18	0.183113	0.425014	n.s.
KRT15	A0A3Q1LJB2;Q17QL7	7	0.426932	0.471259	n.s.
IBA57	E1BC94	7	0.00391769	0.982265	n.s.
AARS2	A0AAA9SW81	23	-0.049184	0.763047	n.s.
RANBP10	F1MSI0;A3KMV8	10	-0.0103989	0.93305	n.s.
ACADVL	P48818;A0AAA9SJ11	27	0.0939881	0.670144	n.s.
LIN9	F1MIQ3	4	0.0478746	0.703039	n.s.
PPL	F1N2K8	28	-0.113556	0.495979	n.s.
MRPS18A	P82919;A0AAA9S1F2	6	-0.0805241	0.584192	n.s.
CCAR1	Q17R04	23	-0.0339863	0.763683	n.s.
DGCR8	A6QR44	9	-0.102867	0.414912	n.s.
VPS33B	Q2HJ18;A0AAF6YGW2	16	0.00161171	0.98796	n.s.
TCIRG1	Q1RMS1	13	0.107435	0.703968	n.s.
PPP2R5D	F1N1S8	13	-0.125087	0.49539	n.s.
PIGZ	E1BCR7	5	0.340138	0.437583	n.s.
PDZD11	Q32LE7	6	0.148215	0.580031	n.s.
TOM1	Q5BIP4	20	-0.118417	0.116668	n.s.
PEX16	Q2KII7;A0A3Q1NJR3	11	-0.00444412	0.980662	n.s.
COG6	Q3SZI7;F1MLE3	15	0.122847	0.0461136	n.s.
ATL2	A0A3Q1LP31	14	0.206965	0.255177	n.s.
DDX54	A0A3Q1MU57	18	-0.202505	0.19665	n.s.
PRPSAP1	A0AAF6ZDQ7;Q08DW2	12	0.0871401	0.667235	n.s.
PRPSAP2	A2VDS0	7	-0.61321	0.10514	n.s.
ATP5PD	P13620	10	0.0520441	0.634676	n.s.
SNTB2	F6QN89	15	-0.227348	0.122653	n.s.
ACSM2B	A0AAA9S5R6	6	1.35745	0.447099	n.s.
SPOUT1	F1MXD0	12	-0.135824	0.154618	n.s.
SLC27A1	F1MB67;Q3ZKN0	16	0.395201	0.168861	n.s.
MRM3	E1BBM0	9	-0.00637388	0.968441	n.s.
GSTK1	A0AAA9TW47	11	0.13634	0.631253	n.s.
PDPK1	A0AAA9TJF9	15	-0.0516485	0.592171	n.s.
RPL7	A0A3Q1LP69;Q58DT1;A0AAA9SNT9;A0AAF6Z7G1;A0A3Q1LKR0;F1N7A3	18	0.0237185	0.829809	n.s.
HECTD1	E1BLD1	42	0.129971	0.523987	n.s.
TAOK2	A0AAA9RVB1	4	0.202876	0.184563	n.s.
CUL4A	F1N3S4	20	0.0520886	0.574045	n.s.
RPL22	A0AAA9SFF8	5	0.242413	0.0568869	n.s.
STK10	A0A3Q1M334;E1BK52	27	0.270901	0.215092	n.s.
MED14	G3X6Y3	21	0.0168422	0.801443	n.s.
VPS4B	Q0VD48	10	0.037329	0.806567	n.s.
CABIN1	G3X746	3	-0.157211	0.545329	n.s.
ATP5MK	A0A3Q1ML84;Q3ZBI7	4	-0.0382457	0.831114	n.s.
ZC3H18	G3MX37	10	-0.0446968	0.585438	n.s.
TEX10	A0A3Q1M1K0	19	0.180238	0.416293	n.s.
EMC3	Q3ZCB8	10	0.0679393	0.321021	n.s.
STAU2	G5E523	6	0.0124794	0.963342	n.s.
STK26	A0A3Q1MJL8	8	0.500323	0.23632	n.s.
SMG9	Q2YDD2;F1MBJ5	7	-0.0569472	0.523575	n.s.
BYSL	Q5E9N0	17	-0.11803	0.572563	n.s.
NIPSNAP1	Q0P5K8	8	-0.0252325	0.919486	n.s.
HS1BP3	A0A3Q1LSP6	11	0.225812	0.0652272	n.s.
ABCC10	E1BNL1	15	0.261487	0.172071	n.s.
FAM83H	A0A3Q1M4P9	19	0.0620325	0.549582	n.s.
SUGP1	A4FV64	12	-0.0302046	0.788883	n.s.
ADM	A0A3Q1MLI7;O62827	5	1.98925	0.26839	n.s.
MRPL11	A0AAA9RV64;Q2YDI0	9	-0.0537766	0.584301	n.s.
PGD	A0A3S5ZPM3	25	-0.161028	0.503807	n.s.
CNN2	Q3SYU6	11	-0.300651	0.234547	n.s.
FA2H	E1BGC2	5	0.437412	0.332613	n.s.
SLC29A1	F6PZI3	10	-0.591537	0.0690175	n.s.
DCP1A	F1N4I7	9	-0.154877	0.381712	n.s.
ANAPC7	E1BM34	14	-0.0146685	0.90238	n.s.
HOOK2	A0AAA9SN40	11	-0.00759125	0.956691	n.s.
TFB2M	Q32LD4	8	-0.111581	0.560902	n.s.
ZFYVE26	A0A452DJ92;E1BLZ4	23	0.267438	0.0204037	n.s.
CNN3	Q32L92	11	-0.217474	0.320459	n.s.
AAK1	F1MH24;A0A3Q1LT42	27	-0.061005	0.543722	n.s.
ALG9	A0AAA9TM73	14	0.277691	0.326395	n.s.
IRF3	Q4JF28	7	-0.119389	0.658322	n.s.
GREB1L	A0A3Q1MQZ3	41	0.101039	0.523011	n.s.
ABL2	F1MWH8	8	-0.223071	0.169496	n.s.
MYD88	A0A452DHW6;Q599T9	8	0.292552	0.00783506	n.s.
QTRT2	F6Q3R4	11	-0.281388	0.166657	n.s.
SELENOO	G3X686	5	0.198646	0.573266	n.s.
MISP3	F1N705	6	0.422589	0.612332	n.s.
ESPL1	F1MW01	19	-0.00760873	0.981305	n.s.
WWC2	F1MZS1	14	0.601249	0.305442	n.s.
MYO6	E1BPK6	59	0.238779	0.407046	n.s.
LAD1	A0A3S5ZP82	12	0.145969	0.708916	n.s.
RSF1	A0A3Q1LP30	16	0.036423	0.593376	n.s.
STT3B	A5D7G6	13	-0.052039	0.750853	n.s.
BAG6	A0AAA9S5L9	20	0.0527903	0.741136	n.s.
KRI1	Q0V8M0	12	-0.0656951	0.632563	n.s.
OSTF1	Q8MJ50	11	0.229532	0.0159039	n.s.
PTPN1	A0AAA9TFV5	20	0.0870498	0.639518	n.s.
VWA8	F1MIM5	44	0.142214	0.365482	n.s.
CORO7	A0AAA9T466;Q0V8F1	19	0.451857	0.0601515	n.s.
PALM3	A0A3Q1LZW1	9	-0.337289	0.541271	n.s.
TRIP13	F1N3B9	12	-0.0611965	0.801273	n.s.
MRPL41	A5PJ71	6	0.196716	0.0424905	n.s.
BAZ1B	E1B6X6	39	-0.130847	0.233274	n.s.
FRMD8	F6QQB6	10	0.00307814	0.987193	n.s.
PHGDH	A0A140T866;Q5EAD2	26	0.588859	0.1622	n.s.
PHF3	A0AAA9T2E9	10	0.055064	0.571923	n.s.
CERS2	A0AAA9TYA9;Q3ZBF8	7	-0.222885	0.0897934	n.s.
COL23A1	F1MSJ7	2	-1.41359	0.137477	n.s.
UTP14A	Q3T0Q8;A6QLB4	23	-0.232606	0.293514	n.s.
ITGAV	P80746;A0A3Q1MXS2	26	-0.0955596	0.787761	n.s.
GATA3	Q08DV0;A0A452DIR6	9	0.127564	0.626276	n.s.
CAPN6	E1BJ18	18	-0.107817	0.921946	n.s.
UNC13D	E1BFF0	19	1.06055	0.200723	n.s.
CORO2A	Q32LP9;A0AAA9TQU6;A0A3Q1LJQ5	15	0.0484034	0.923867	n.s.
NUP160	F1MZR0	35	0.0407527	0.75127	n.s.
TTC9C	A0AAA9RWC7;E1BJN0;A4IFF3	4	-0.0809104	0.446506	n.s.
NFRKB	F1MPR9	8	-0.155369	0.425265	n.s.
NAGK	A0A452DJF8;Q3SZM9	10	0.180045	0.17193	n.s.
GDPGP1	Q5E9T1	7	-0.0057296	0.96685	n.s.
FBLN2	E1BEB4	40	-0.639218	0.449946	n.s.
PDZK1	Q3T0X8;A0A452DI72	17	-0.0490623	0.849418	n.s.
MPPE1	A0A3Q1MCX7	9	0.28694	0.547721	n.s.
RTRAF	Q3T0S7	13	0.174339	0.0539994	n.s.
PDCD6	A0AAA9T4F5	7	0.158099	0.388519	n.s.
RPL7A	Q2TBQ5;A0AAA9S7M5	17	0.0381045	0.653009	n.s.
EIF2B4	Q3T058;A0A3Q1LPP5	8	0.0194267	0.844424	n.s.
PAF1	Q2KJ14	16	-0.0398962	0.451334	n.s.
ESYT2	A0AAA9SS32	27	-0.0273636	0.932594	n.s.
THAP11	A5PKF5	4	-0.0754939	0.581093	n.s.
CPOX	E1BKY9	19	-0.00909789	0.953212	n.s.
STARD10	F1MXU5	12	0.452419	0.168128	n.s.
CMBL	F1N2I5	7	-0.152455	0.72154	n.s.
PGS1	A0AAA9T2G4;Q2KJ28	10	0.184602	0.353303	n.s.
ACTR5	A0AAA9SR01	7	-0.0106217	0.934321	n.s.
MFN2	D7GLD0	15	0.186126	0.0832733	n.s.
PFN1	P02584;E1BHJ0	12	0.303769	0.141698	n.s.
HSD3B	P14893	8	0.200958	0.813256	n.s.
NDUFA10	P34942;A0AAA9SAR7	14	-0.0209689	0.867452	n.s.
SEC23B	Q3SZN2	22	0.0252843	0.706541	n.s.
TRANK1	A0AAA9SEL9	5	-0.0618039	0.828363	n.s.
ZFR	F1N0Y9;A0A3Q1MI58	24	-0.0465417	0.524226	n.s.
FXR2	A0A3Q1MDB8	11	0.0265471	0.783495	n.s.
FBLN1	A0A3Q1MJB2	7	-0.431115	0.619875	n.s.
AIP	A0A3S5ZP93;Q7YRC1	9	-0.199628	0.314621	n.s.
ARHGAP1	F6RWK1	19	0.290378	0.368542	n.s.
LRRC8D	A4IFE5	22	-0.0190508	0.89696	n.s.
PRKCI	F1MQ96	13	-0.231981	0.165614	n.s.
EIF2B3	A0AAF6DMG9;A5PJI7	19	-0.0544507	0.702707	n.s.
CSTF1	A0JN63	9	0.0378257	0.794632	n.s.
WDR1	Q2KJH4;F1MTP5	22	-0.0472849	0.719315	n.s.
ANO9	A0AAA9RY92	10	0.164933	0.260404	n.s.
NT5C3B	F1MLB9	8	0.117432	0.460432	n.s.
PREB	A0AAA9RV38	10	-0.0416249	0.662112	n.s.
CCT8	Q3ZCI9;G3X861	41	-0.079531	0.645722	n.s.
KIF15	E1BC41	32	-0.0549446	0.722777	n.s.
FAM111B	E1BGY1	11	0.126211	0.635134	n.s.
SKIC2	A0AAA9SE27	25	-0.0242484	0.807725	n.s.
GCLM	Q2T9Y6	9	0.0119041	0.963624	n.s.
PALS1	E1BIQ8	17	-0.368026	0.179014	n.s.
AP1M1	Q2KJ81	7	-0.0418371	0.823212	n.s.
AP1M2	A0A3Q1LWL6;Q3SYW1	16	0.243188	0.116819	n.s.
FAM169A	F1N5F9	15	0.269463	0.206756	n.s.
TNPO1	Q3SYU7	23	-0.0800759	0.382392	n.s.
ATP13A3	E1BG26	7	-0.157551	0.321798	n.s.
ATP5F1B	A0A452DII8;P00829	26	0.0663819	0.601896	n.s.
HDHD3	Q5E9D6;A0A452DHL8	9	0.0462988	0.687231	n.s.
COL4A1	Q7SIB2	5	-0.751352	0.416739	n.s.
ZNHIT2	Q2TBW5	3	-0.0284981	0.885902	n.s.
ITGA5	Q27977	15	-0.75953	0.227048	n.s.
AKAP13	A0A3Q1MRE3	35	0.02785	0.842174	n.s.
PCYT2	A0A3Q1MLB5;Q5EA75	14	-0.141614	0.545694	n.s.
CLTC	P49951;A0AAA9SF14	80	0.178164	0.240656	n.s.
MOV10	Q0V8H6;A0AAF6YZT3	47	-0.0443889	0.75163	n.s.
SPINDOC	E1BD11	3	-0.429266	0.251563	n.s.
MEN1	A0AAF6YJE9;Q0P5I0	6	0.0300504	0.791847	n.s.
ADSS2	A7MBG0	14	-0.0938203	0.716428	n.s.
SRP68	F6RAC6	32	-0.00891097	0.860378	n.s.
KNOP1	A0A452DJ63;A5D7J3	11	-0.204462	0.13993	n.s.
VPS39	A0AAA9TAD1	25	0.210251	0.0346958	n.s.
CYB561D2	Q5E965	2	-0.0608735	0.474149	n.s.
TDP1	A0AAA9T3H0	8	-0.114882	0.312118	n.s.
VTI1A	A0AAA9S2Q2	3	-0.172219	0.23011	n.s.
RPL3	A0AAF6YKW6;P39872	12	0.0180875	0.747446	n.s.
SPICE1	Q2T9X8;F1MIU6	4	-0.313533	0.350241	n.s.
SIPA1L1	A0A3Q1M3G5	27	-0.0411197	0.885411	n.s.
PABPC4	F6RN21	17	0.0874322	0.338451	n.s.
ANXA11	A0AAA9SWE4;P27214;A0AAA9U0R7	18	0.196575	0.648118	n.s.
GMPPA	A0A3Q1LUY6	14	0.0442665	0.845951	n.s.
CHMP3	Q58CS7	4	-0.169284	0.394488	n.s.
PRSS12	A0A3Q1M9L2	22	-0.166814	0.538434	n.s.
SIPA1L3	A0A3Q1MMG4	10	0.0667632	0.760127	n.s.
COL4A2	F1N7Q7;Q7SIB3	8	-0.697514	0.445131	n.s.
URB2	F1MJR1	29	0.0115824	0.877662	n.s.
UBALD1	A0AAF6DLT8	2	-0.100619	0.788618	n.s.
BAHD1	F1MSG4	8	0.0084335	0.973669	n.s.
A4GALT	A0AAA9TNA8	5	-0.186692	0.317139	n.s.
LOC522479	A0A3Q1LTS9	7	-0.112077	0.927502	n.s.
GPX1	P00435	10	-0.386236	0.38436	n.s.
DAXX	F1MGU0	5	0.0140209	0.845947	n.s.
TPX2	A6H6Z7;A0A3Q1MAL7	16	-0.184148	0.409587	n.s.
FAF2	Q2HJD0	13	0.0777605	0.461831	n.s.
LAMA5	A0A3Q1MA79	94	-0.792594	0.290218	n.s.
TBC1D25	E1BHZ5	6	-0.207807	0.306025	n.s.
PPP6C	Q2KIC7	9	0.120475	0.343808	n.s.
PPP4C	A6H772	8	0.0973536	0.570866	n.s.
SIKE1	Q0VCF3;A0AAA9RW05	9	0.0925539	0.535006	n.s.
BSPRY	F1MKU3	16	0.348735	0.156752	n.s.
ZCCHC8	F1MM78	18	0.0275397	0.729742	n.s.
PROS1	A0AAF6ZAV2;P07224	11	0.546816	0.532635	n.s.
PI4KA	A0A140T888;O02811	35	-0.0163417	0.923374	n.s.
DENND4C	F1N032	28	-0.264892	0.277728	n.s.
WDR77	Q5E9I7	11	-0.155404	0.476125	n.s.
STIM1	A0AAA9SQQ0;Q58CP9	13	-0.524984	0.290663	n.s.
COPS2	G3X736	19	0.00906595	0.951054	n.s.
PTPRF	A7MBJ4	16	0.178929	0.337622	n.s.
RNF213	A0A3Q1LV49	51	-0.648195	0.144851	n.s.
GGACT	A0AAF7A0Y9;Q0VFX9	6	0.150422	0.280479	n.s.
POLD2	P49004;A0A3Q1N4D8	13	-0.105495	0.411942	n.s.
DOCK8	E1BNA6	17	0.270393	0.535436	n.s.
FARS2	Q08D87	11	-0.0170019	0.877556	n.s.
SEC23IP	E1BKW5	21	-0.096636	0.263824	n.s.
CAD	F1MVC0	61	-0.247946	0.287909	n.s.
MT-ND4	P03910	4	-0.0529475	0.733175	n.s.
SMCHD1	F6RF21	63	-0.0883619	0.652786	n.s.
CAPG	Q865V6	14	0.387105	0.0508702	n.s.
RAD21	Q3SWX9	16	-0.00887537	0.940404	n.s.
HOMER3	A0AAA9THN5	8	1.03191	0.311447	n.s.
PRDX2	Q9BGI3;A0AAA9RUA3	10	-0.0226426	0.867996	n.s.
VCP	G3X757;Q3ZBT1	49	0.094444	0.0546778	n.s.
CTNNA1	Q3MHM6;A0A3Q1M9M0	36	0.133671	0.505832	n.s.
NATD1	A6QL79	2	0.616766	0.0233008	n.s.
NSA2	Q3SX11	8	-0.0671048	0.686258	n.s.
VEZT	F1MQ09	9	-0.0484445	0.830653	n.s.
NCBP2AS2	A0A3Q1NMJ3	3	0.161783	0.343902	n.s.
GSS	Q5EAC2;A0A140T850	15	0.624744	0.0462085	n.s.
EML3	F6RJ80	9	0.0459637	0.679286	n.s.
DALRD3	E1BGI8	3	-0.00892766	0.977836	n.s.
BPNT1	Q3ZCK3;A0A3Q1MCU7	13	0.0201893	0.866084	n.s.
SUPT6H	A0A3Q1LVF3	46	-0.0118999	0.855863	n.s.
LARP4B	A0A3Q1LR80	15	0.0467865	0.787518	n.s.
NR2F6	F1N3S3	6	-0.0750212	0.62137	n.s.
PDSS1	A0AAA9TV23	5	0.00235605	0.994261	n.s.
AGO1	A0A3Q1MEG1	12	0.174251	0.480319	n.s.
AGO2	Q6QME8;A0AAA9S2J2	20	-0.17415	0.379068	n.s.
NID2	F1MF97	49	-0.755009	0.398464	n.s.
PFKM	Q0IIG5	13	-0.698168	0.311576	n.s.
POLR2M	Q17QE3	5	0.218714	0.0993338	n.s.
SGTA	Q32LM2	11	-0.108061	0.405922	n.s.
STAG2	G3X6R3	23	0.053468	0.820714	n.s.
GCNT3	Q7YQE1	15	0.287142	0.212642	n.s.
PSMC1	A4FUZ3	23	0.0869422	0.411082	n.s.
ANKFY1	F1MD79	15	-0.183391	0.461917	n.s.
WNT4	A0A3Q1MJR6	4	-0.458149	0.416459	n.s.
GALNS	A0AAA9U1E9	13	0.455401	0.261191	n.s.
ST13	A7E3S8;A0A3Q1M4L0;A0AAA9TBE2	9	-0.156041	0.235835	n.s.
STRBP	Q08E27;A0AAF7AND0	17	-0.0275364	0.828257	n.s.
SNX8	Q2KHV6	17	0.131909	0.702074	n.s.
DIAPH3	E1BMN2	4	-0.247724	0.344724	n.s.
ADAM10	Q10741	20	-0.316687	0.116726	n.s.
EFR3A	A0AAA9T2Q2	14	-0.249901	0.0830793	n.s.
VPS50	A0A3Q1MPN8	18	0.0363019	0.540548	n.s.
SYNCRIP	F1MCT8	20	0.070473	0.472647	n.s.
DHCR7	Q5E9J5	6	-0.0499903	0.854478	n.s.
SAFB	A0AAA9TEU1;A0AAF6DM79	20	-0.10333	0.448987	n.s.
SMARCA2	A5PKK5	7	-0.429866	0.346651	n.s.
DIS3	F1N1R4	26	0.0444803	0.653121	n.s.
SMARCA4	A0AAA9TIX2;A7Z019	19	0.0561473	0.441116	n.s.
FANCD2	E1BE83	17	-0.145736	0.385489	n.s.
LARP7	A0A3Q1LP50	25	-0.0352179	0.736168	n.s.
RMDN2	Q2TBQ7	7	0.011125	0.958428	n.s.
UAP1	F1MJP7	15	-0.12844	0.543144	n.s.
CLCN2	A0AAA9RVB8	12	0.00823291	0.97138	n.s.
WASHC4	A0A3Q1MJ20	25	0.199849	0.0176756	n.s.
FGFR1OP2	E1BBF9	6	-0.0780348	0.651097	n.s.
GIPC1	E1BJQ7	11	-0.173396	0.0393997	n.s.
NMT1	F1MZK0;P31717	10	-0.0437756	0.74509	n.s.
SRP72	E1BB38	29	0.0825464	0.141558	n.s.
NGRN	Q2HJC0;A0AAF6Z046	3	-0.0774864	0.749345	n.s.
SMAD2	Q1W668;E1BE92	3	-0.00854476	0.964917	n.s.
STX4	A0A452DIB2;Q3SWZ3	9	-0.274492	0.0634586	n.s.
AP1S1	Q1JQ98	5	0.234063	0.124857	n.s.
VPS16	F1MQ47;Q5E9L7	21	0.0758592	0.281107	n.s.
NRDE2	A0A3Q1NNB2	11	-0.118556	0.250603	n.s.
NIT1	Q32LH4;A0AAA9RRT9	3	-0.0357211	0.876849	n.s.
GTF3C3	A0A3Q1M0Z5	9	0.0880466	0.514589	n.s.
GNPTG	Q58CS8;A0AAA9S597	5	-0.15344	0.478718	n.s.
UTP6	F6R8I1	19	-0.186443	0.0670098	n.s.
TOR1A	A5PK75	10	0.20256	0.456307	n.s.
TOR1B	F1MBM5	5	0.266754	0.0767472	n.s.
CORO1C	A0AAA9SY31	18	0.387457	0.11076	n.s.
LOC534913	A0AAA9SND9	7	0.0149504	0.862322	n.s.
DHX30	F1N0J0;Q2NKY8	36	0.0593607	0.431568	n.s.
KRT6A	P04260;F1MKE7	6	0.508338	0.406315	n.s.
PCGF6	E1BJL2	3	0.288342	0.318666	n.s.
PPM1G	P79126	8	-0.029789	0.847448	n.s.
YLPM1	E1BGC5	28	-0.146827	0.2788	n.s.
PGM1	Q08DP0;F1MJS4	18	-0.0175443	0.899819	n.s.
APPBP2	E1B7N1	4	0.0718416	0.784817	n.s.
TNKS1BP1	A0A3Q1N4H7	44	-0.0159801	0.944779	n.s.
SLC25A46	A0A3Q1MHM6	3	-0.0537571	0.7808	n.s.
CDC16	A0AAA9TJI9	8	-0.0413009	0.702873	n.s.
MTREX	A0AAF6DLQ5	33	0.024996	0.542491	n.s.
INTS8	A5PJS8	9	0.0271614	0.776838	n.s.
PSMA5	A0AAF6Z8I1;Q5E987	11	0.104537	0.468914	n.s.
TGM1	F1MBB7	30	-0.572643	0.411342	n.s.
DNAJB12	F1MII1;Q58DR2	7	0.0164796	0.933611	n.s.
NFS1	A0AAA9T7J9	10	0.124778	0.510839	n.s.
IPO5	F1MPE5	40	-0.05502	0.664782	n.s.
PLPP1	A0AAA9STE8	2	0.316652	0.559077	n.s.
CD9	A0AAA9RTY1;P30932	3	0.00647036	0.980083	n.s.
TNPO3	A5D7C4	27	-0.00312503	0.978669	n.s.
DOCK5	A0A3Q1MC59	35	0.33565	0.207713	n.s.
PEX1	A0AAA9S682	17	0.121271	0.483527	n.s.
PSMB4	Q3T108	5	0.0665083	0.485244	n.s.
MEMO1	Q2HJH7;A0AAA9SKU6	11	0.143084	0.24921	n.s.
XPO1	E1BE98	39	-0.0061663	0.924604	n.s.
YTHDC2	F1MNU7	14	0.123293	0.325246	n.s.
CHML	A0AAA9SJP0	7	0.400162	0.0118821	n.s.
CPD	E1BLR9	26	0.31769	0.252996	n.s.
HNF4A	F6Q8S4	3	-0.968348	0.253354	n.s.
FDFT1	Q32KR6;A0AAA9TVZ3	19	-0.0367471	0.923875	n.s.
RPS7	A6H769	9	0.179955	0.465392	n.s.
RXRB	A0AAF6DMC7	2	0.229989	0.744466	n.s.
ARMH3	F1MSE5	13	0.188964	0.0216751	n.s.
GAK	F1MIB2	28	0.168069	0.0114715	n.s.
SPG11	F1MEB4	28	0.136309	0.233935	n.s.
EIF5B	F1N6Y7	29	0.213614	0.0377639	n.s.
CLTA	P04973	6	0.207231	0.125905	n.s.
CCT7	Q2NKZ1	30	-0.122428	0.441342	n.s.
OS9	Q3MHX6;F1MX65	13	0.0668834	0.554819	n.s.
MCM3	A4FUD9;A0AAF6YVB0	36	0.041467	0.542586	n.s.
TBC1D10A	F1MB46	12	0.0599995	0.431979	n.s.
NSMCE1	Q3T0X7;A0A3Q1MQS1	4	0.0541457	0.69159	n.s.
STRIP1	Q0P5J8;A0A3Q1MT54	10	-0.0416222	0.744761	n.s.
MAD1L1	A0A3Q1MWV1	20	0.00130828	0.994842	n.s.
HK2	A0A3Q1LZ02	28	0.189565	0.374791	n.s.
ACTR8	A0A3Q1MDF9;Q1LZF2	8	0.180035	0.135002	n.s.
COPZ1	A0AAF6YNH6;P35604	6	-0.152378	0.22085	n.s.
CYB5R1	Q3MHW9	8	0.058342	0.727992	n.s.
BICD1	F1ML98	4	0.238166	0.407872	n.s.
TTC27	Q17QZ7;A0AAA9SPB9	21	-0.0465729	0.852033	n.s.
LTA4H	Q3SZH7	24	0.0278058	0.906196	n.s.
PUS7	F1ML88;Q08DI8	15	-0.132998	0.612832	n.s.
HK1	A0A3S5ZPF0;P27595	25	0.142975	0.593318	n.s.
SMC5	F1MPW4	12	-0.0395994	0.723348	n.s.
CKAP2	A0A3Q1M6K8;A5D7U0	10	-0.323769	0.130706	n.s.
GSTA3	Q1JQ90	4	0.0915819	0.941371	n.s.
ARL1	Q2YDM1	9	0.173513	0.168139	n.s.
A2M	Q7SIH1	25	0.0356021	0.974201	n.s.
DOP1A	F1MPE2	6	0.243252	0.239413	n.s.
ADAR	F1MUM9	18	-0.258895	0.253558	n.s.
SMS	Q3SZA5	16	0.00214243	0.991127	n.s.
CYB5R3	P07514;A0A3Q1LZ18	16	0.14672	0.590676	n.s.
NPL	Q29RY9	2	0.442242	0.477345	n.s.
NR6A1	F1MXG9	13	0.08612	0.703702	n.s.
FXR1	A0A3Q1M5A0;Q2TBT7	22	-0.120861	0.318345	n.s.
PCK1	Q8HYZ4;F1N1Z7	12	-0.987553	0.0917393	n.s.
PSMA6	Q2YDE4;A0AAA9S278	14	0.116826	0.0762533	n.s.
KHSRP	A0A3Q1NE05	23	0.1198	0.142618	n.s.
MIS18BP1	A0AAA9T6H1	8	-0.295912	0.100699	n.s.
UBAP2L	A0AAA9TFY7	15	-0.425854	0.104565	n.s.
INHCA	A0A3Q1MUV9	13	0.440574	0.36991	n.s.
ZFAND6	Q3SZY7	6	0.159016	0.0468686	n.s.
PDIA5	A0AAA9RXH7;Q2KIL5	24	-0.192221	0.520945	n.s.
EDF1	Q3T0V7	3	-0.0753188	0.511819	n.s.
MERTK	F1N381	5	0.0716244	0.634832	n.s.
DGKZ	A0AAA9SCA8	11	0.286542	0.03942	n.s.
VPS51	A6QQ47;F1MJ84	18	0.156011	0.0751233	n.s.
FAM3C	A5PKI3	8	0.00795937	0.911525	n.s.
TOLLIP	Q2LGB5;A0AAF6YRW2	8	0.262625	0.307391	n.s.
C19H17orf75	E1BCP5	6	-0.153363	0.476466	n.s.
GNPAT	A4IF87;A0A3Q1LQH8	19	0.218073	0.3387	n.s.
CCNB2	O77689;A0A140T859;A0A3Q1MR83	6	-0.148161	0.630551	n.s.
TTK	E1BPP1	8	-0.260368	0.31184	n.s.
MAP3K11	F1MC61	5	0.118436	0.645562	n.s.
PSMD3	Q2KJ46	30	0.0842063	0.485691	n.s.
TTC1	Q3ZBR5	11	-0.0300992	0.894652	n.s.
RALGPS2	E1BNN3	9	-0.389795	0.32961	n.s.
EP400	A0AAA9U053	12	-0.0538503	0.679011	n.s.
EZH2	A0AAA9THU3	14	0.0600676	0.554562	n.s.
DCUN1D3	Q5E9V1	2	0.155244	0.501212	n.s.
MTA1	A0A3Q1MK17	8	-0.0980692	0.701492	n.s.
PHYH	A0AAF6YRS4;O18778	8	-0.0918286	0.747614	n.s.
WFS1	G3N348	3	0.735134	0.653912	n.s.
WDR24	F1MJS7	7	-0.0881318	0.566735	n.s.
ZC3H14	Q3ZC82	22	-0.179634	0.177917	n.s.
ZNF259	Q2TBX0	15	-0.0362363	0.862189	n.s.
PPP2R1A	F6QI68;Q32PI5	17	-0.00349728	0.960315	n.s.
MYO5A	A0A3Q1LUB6	28	0.0416781	0.86126	n.s.
ARFGAP2	A1L520;A0AAA9SHG7	15	-0.195186	0.143958	n.s.
POLR3A	A4IF62	17	0.0679897	0.589569	n.s.
PDCL3	A0AAA9T5C0;Q0VCW8	7	0.00534232	0.978167	n.s.
ZYX	F6PUM3	17	-0.120306	0.500821	n.s.
TBRG4	Q3SZK4;A0AAA9S1P7	16	-0.0106408	0.796922	n.s.
YTHDF3	A0A3Q1LJ04	10	-0.167125	0.129019	n.s.
RABGEF1	G3X6D4;O18973	8	-0.063095	0.61521	n.s.
PWWP2B	F6QPT2	2	0.000762383	0.998683	n.s.
RFC4	A0A3Q1M190	16	-0.164168	0.0928984	n.s.
RPL24	Q862I1;A0AAA9TQX1	6	-0.0274148	0.846831	n.s.
HNRNPL	E1BIB4	18	0.0228356	0.875074	n.s.
PCBP2	F6RMB4	8	-0.0198174	0.770558	n.s.
PCBP1	Q5E9A3	10	0.0963297	0.420107	n.s.
DPYSL3	A7MBI5	4	-0.419657	0.594427	n.s.
GAPDH	P10096;A0A3Q1LPH5	11	0.0561897	0.618615	n.s.
CDCA2	Q29RT4;F1MG31	10	-0.279444	0.174134	n.s.
PAN2	E1BML0	8	0.0627026	0.685861	n.s.
CRYBG2	A0A3Q1MVS6	13	0.241755	0.529081	n.s.
TSNAX	G3MY03	9	0.0104405	0.967763	n.s.
MRPS9	A0AAA9TAD0;Q58DQ5	16	-0.0230031	0.845525	n.s.
TMEM70	A6H773;A0A452DJC9	5	-0.0311147	0.816544	n.s.
BIN2	A4FUG5	17	0.327591	0.269025	n.s.
COPG2	A2VE21	18	0.112131	0.0378079	n.s.
ADGRL2	O97817;A0A3Q1MQ77	19	0.055776	0.797025	n.s.
CHAF1B	A5D9H4	10	0.0656845	0.476331	n.s.
POLR2G	Q5E9B8;A0AAF6YTR5	6	-0.00245555	0.985129	n.s.
RPP25	A0AAA9U238	4	0.33227	0.582906	n.s.
SRPRB	F1MLG1	14	0.016366	0.821673	n.s.
RXRA	A0AAA9T9C1	7	0.352462	0.235686	n.s.
NR2F2	Q9TTR7	2	0.508889	0.163205	n.s.
OIP5	E1BAL2	2	-0.6855	0.295605	n.s.
PECR	A0AAA9TYP4	4	0.163548	0.540938	n.s.
PAFAH1B3	A0AAF7ABT5;Q29460	9	0.0691973	0.675987	n.s.
YEATS2	A0AAA9SZB7	9	-0.356326	0.0508474	n.s.
IPO9	G5E567	17	0.0447246	0.496054	n.s.
SOD2	P41976;E1BHL1	6	-0.116569	0.112207	n.s.
PSMD12	A0AAF6YJJ1;Q2KJ25	21	0.0411294	0.646189	n.s.
MPHOSPH6	A0AAA9S999	3	-0.0947719	0.245038	n.s.
CRNKL1	F1MZT2	18	0.0245501	0.711732	n.s.
GFM1	A0AAA9TGR1	23	-0.125912	0.0470079	n.s.
RFC3	Q2TBV1	17	-0.254414	0.0528341	n.s.
ATP6V0A1	Q29466;F1MJV0	15	0.050554	0.855071	n.s.
GCNT1	F1MUW5;Q92180	12	-0.217951	0.1494	n.s.
FNBP1L	A0A3Q1MAC0	15	0.16396	0.104672	n.s.
PSMB5	Q32KL2	13	0.274603	0.0807973	n.s.
GRB2	F6RGB4	11	0.141187	0.12267	n.s.
CPSF2	A0AAF6YUI9;Q10568	26	0.154412	0.153034	n.s.
RIOX1	A5PK74	14	-0.0931594	0.62338	n.s.
RASAL2	A0A3Q1M8V3	11	-0.080363	0.540107	n.s.
PHB2	Q2HJ97	15	-0.0204959	0.910195	n.s.
ADA	A0A3Q1M5V8;P56658	18	1.07748	0.25582	n.s.
HMOX1	Q5E9F2	11	0.413939	0.028131	n.s.
GOLPH3L	A0AAA9SZV5;A6H7F6	7	0.00640472	0.956879	n.s.
ZMPSTE24	E1BMF2	11	-0.168246	0.398927	n.s.
HMBS	Q2KIN5	7	0.00839535	0.963363	n.s.
FERMT2	A7MB21	30	-0.101606	0.640359	n.s.
MPDZ	A0A3Q1LKW6	5	-0.633716	0.437308	n.s.
RPL13	Q56JZ1;A0AAA9SP49;A0A3Q1M4M0;F1MK30	11	0.0569674	0.54351	n.s.
MRPS27	Q32PI8;A0AAA9S006	15	-0.0322086	0.783428	n.s.
TXNDC16	E1BAG3	16	0.115019	0.7513	n.s.
TSR1	F1MSR6	24	-0.081684	0.757648	n.s.
WARS2	Q3T099;A0AAA9RYF4	9	0.0325638	0.693257	n.s.
EIF3C	Q3SYW6	28	-0.0354702	0.735612	n.s.
RAB6A	A0A3Q1MBS7	8	0.00232061	0.992387	n.s.
RAB6B	A0A452DHU1;A6QR46	5	0.361824	0.438111	n.s.
DAAM1	A0A3Q1LHF1	8	-0.459947	0.269269	n.s.
MFAP1	Q5EA98	8	-0.173241	0.145263	n.s.
ATP5IF1	P01096	2	0.163337	0.427396	n.s.
SLMAP	A0A3Q1LZA0	27	0.152571	0.419164	n.s.
SORD	A0A3Q1M465;Q58D31	14	0.0343723	0.949479	n.s.
CHAF1A	A6QLA6;A0AAA9SXY1	16	-0.205229	0.154152	n.s.
SLC7A4	E1BCI3	9	0.110047	0.844308	n.s.
RWDD1	Q3ZC53	4	-0.0803533	0.65061	n.s.
PRUNE1	A0A3Q1LJH2;Q5E9Y6	9	-0.271668	0.368002	n.s.
HSPA5	Q0VCX2	35	-0.0921618	0.0992794	n.s.
MSN	Q2HJ49	29	0.0426911	0.683812	n.s.
NXF1	Q1RMS5	23	0.016984	0.841964	n.s.
CXADR	A0A3Q1MQS2;Q8WMV3	10	-0.0531734	0.794454	n.s.
CLIP2	A0A3Q1N033	12	0.125774	0.465254	n.s.
AP2A2	A0A3Q1LIW3;Q0VCK5	26	0.147198	0.404885	n.s.
CCT3	Q3T0K2	35	-0.0427663	0.750949	n.s.
ACP1	A0AAF6Z8C2;P11064	6	0.166664	0.429118	n.s.
NFX1	A6QLA0;A0AAA9TJZ3	31	0.0717057	0.6737	n.s.
FCF1	Q32PD0	7	0.0300303	0.75821	n.s.
SAE1	A2VE14	17	0.0366147	0.829068	n.s.
DOCK7	F1N3L7	24	-0.15169	0.470182	n.s.
STN1	A0A3Q1LYR8;Q08DB2	7	-0.199921	0.0824665	n.s.
SEC24A	A6QNT8	27	-0.00429487	0.967002	n.s.
SEC24B	E1BPR4	18	-0.108005	0.177107	n.s.
DLST	A0A3Q1MHE5;P11179	10	0.056575	0.749309	n.s.
RSL1D1	A4FV97	18	-0.0417104	0.622936	n.s.
CACTIN	F1MB35	5	0.0280998	0.85458	n.s.
GFM2	A0AAF6ZIV2;A6QNM2	8	-0.0796221	0.572209	n.s.
RPL29	Q58DW3	3	-0.456486	0.100817	n.s.
USP8	Q0IIM6	22	-0.126452	0.452532	n.s.
GSE1	A0AAA9TBA2	3	0.309449	0.127173	n.s.
PEX19	Q3SZD1	11	-0.388099	0.25337	n.s.
[truncated: 4,664 more rows]
