# Supplementary material for: Pregnancy establishment in cattle without embryonic interferon tau
Source: Research Square preprint supplement (doi:10.21203/rs.3.rs-8509201/v1), 2026-01-16
Supplement: Supplementary file 4 [file 75d96599fd624167d91f538e.xlsx]

## Sheet: Peptides IFNT Trophectoderm
Protein	Protein.Ids	Stripped.Sequence	Charge	F1_KO	F2_KO	F3_KO	F4_KO	F5_1_WT	F5_2_WT	F6_WT
Interferon tau	P56830;A0A3Q1LWI7;P56831;A0A3Q1N661;P15696	ALSSSTTLQK	2	NA	NA	NA	NA	3.79084e+06	2861657	1.38615e+06
Interferon tau	P56830;P56831	CYLSEDHMLGAR	2	NA	NA	NA	NA	1.71571e+06	1.39402e+06	531972
Interferon tau	P56830;P56831	CYLSEDHMLGAR	3	NA	NA	NA	NA	597337	472264	223592
Interferon tau	P56831;A0A3Q1N661	DFGLPQEMVEGSQLQK	2	NA	NA	NA	NA	1.04506e+06	805033	327130
Interferon tau	A0A3Q1ML43	DFGLPWEMVEGDQLQK	2	NA	NA	NA	NA	62849.1	33880.1	26006.9
Interferon tau	P56831;A0A3Q1N661	KDFGLPQEMVEGSQLQK	2	NA	NA	NA	NA	331221	265623	88512.4
Interferon tau	P56831;A0A3Q1N661	KDFGLPQEMVEGSQLQK	3	NA	NA	NA	NA	271468	201294	63217.3
Interferon tau	A0A3Q1ML43	KDFGLPWEMVEGDQLQK	3	NA	NA	NA	NA	50788.5	28461.1	15493.4
Interferon tau	P56831;A0A3Q1N661	KYFQDIHVYLK	2	NA	NA	NA	NA	191429	135373	45255.2
Interferon tau	P56830;A0A3Q1LWI7;P56831;A0A3Q1N661;P15696	LSPHPCLQDR	2	NA	NA	NA	NA	1.38941e+06	1.27479e+06	1.1414e+06
Interferon tau	P56830;A0A3Q1LWI7;P56831;A0A3Q1N661;P15696	LSPHPCLQDRK	2	NA	NA	NA	NA	149314	155785	39349.4
Interferon tau	A0A3Q1ML43	LSTHSCLQDR	2	NA	NA	NA	NA	111222	75522.9	33096.9
Interferon tau	P56830;A0A3Q1LWI7;P56831;A0A3Q1ML43;A0A3Q1N661;P15696	MGPILTVKK	2	NA	NA	NA	NA	24040	30867.7	NA
Interferon tau	A0A3Q1LWI7;A0A3Q1N661;P15696	SLGCYLSEDHMLGAR	2	NA	NA	NA	NA	275353	184168	67621.8
Interferon tau	A0A3Q1LWI7;A0A3Q1N661;P15696	SLGCYLSEDHMLGAR	3	NA	NA	NA	NA	176170	96077.3	43868.1
Interferon tau	P56831;A0A3Q1N661	YFQDIHVYLK	2	NA	NA	NA	NA	319798	115302	90564.6
							Sum	1.0502e+07	8.13012e+06	4.12323e+06
							log2 Sum	23.3242	22.9548	21.9753

## Sheet: Sum of intensities (log2)
Protein	Run	Group	LFQ
Interferon tau	F1_KO	KO	NA
Interferon tau	F2_KO	KO	NA
Interferon tau	F3_KO	KO	NA
Interferon tau	F4_KO	KO	NA
Interferon tau	F5_1_WT	WT	23.32
Interferon tau	F5_2_WT	WT	22.95
Interferon tau	F6_WT	WT	21.98
