# Supplementary material for: Pregnancy establishment in cattle without embryonic interferon tau
Source: Research Square preprint supplement (doi:10.21203/rs.3.rs-8509201/v1), 2026-01-16
Supplement: Supplementary file 5 [file 9dc58a7c723ced4a5c86fabd.xlsx]

## Sheet: STRING analysis (Reactome)
#term ID	term description	observed gene count	background gene count	strength	signal	false discovery rate	matching proteins in your network (IDs)	matching proteins in your network (labels)
BTA-913531	Interferon Signaling	12	57	1.73	3.42	7.04e-14	9913.ENSBTAP00000005749,9913.ENSBTAP00000010366,9913.ENSBTAP00000011469,9913.ENSBTAP00000016365,9913.ENSBTAP00000019573,9913.ENSBTAP00000031815,9913.ENSBTAP00000036313,9913.ENSBTAP00000041289,9913.ENSBTAP00000041757,9913.ENSBTAP00000058906,9913.ENSBTAP00000067158,9913.ENSBTAP00000071973	STAT2,IFIT1,EIF2AK2,UBA7,ISG15,IRF3,IRF9,MX1,RNASEL,HERC5,STAT1,USP18
BTA-1169410	Antiviral mechanism by IFN-stimulated genes	10	30	1.93	3.48	3.11e-13	9913.ENSBTAP00000010366,9913.ENSBTAP00000011469,9913.ENSBTAP00000016365,9913.ENSBTAP00000019573,9913.ENSBTAP00000031815,9913.ENSBTAP00000041289,9913.ENSBTAP00000041757,9913.ENSBTAP00000058906,9913.ENSBTAP00000067158,9913.ENSBTAP00000071973	IFIT1,EIF2AK2,UBA7,ISG15,IRF3,MX1,RNASEL,HERC5,STAT1,USP18
BTA-1169408	ISG15 antiviral mechanism	9	26	1.94	3.19	4.97e-12	9913.ENSBTAP00000010366,9913.ENSBTAP00000011469,9913.ENSBTAP00000016365,9913.ENSBTAP00000019573,9913.ENSBTAP00000031815,9913.ENSBTAP00000041289,9913.ENSBTAP00000058906,9913.ENSBTAP00000067158,9913.ENSBTAP00000071973	IFIT1,EIF2AK2,UBA7,ISG15,IRF3,MX1,HERC5,STAT1,USP18
BTA-168256	Immune System	24	1368	0.65	0.94	1.64e-07	9913.ENSBTAP00000005749,9913.ENSBTAP00000009415,9913.ENSBTAP00000010366,9913.ENSBTAP00000011469,9913.ENSBTAP00000013108,9913.ENSBTAP00000016359,9913.ENSBTAP00000016365,9913.ENSBTAP00000019573,9913.ENSBTAP00000020771,9913.ENSBTAP00000024505,9913.ENSBTAP00000027362,9913.ENSBTAP00000031815,9913.ENSBTAP00000033956,9913.ENSBTAP00000036313,9913.ENSBTAP00000041289,9913.ENSBTAP00000041757,9913.ENSBTAP000…	STAT2,C1QA,IFIT1,EIF2AK2,DTX3L,B2M,UBA7,ISG15,VAV3,PSMF1,HERC6,IRF3,FCER1G,IRF9,MX1,RNASEL,ALDH3B1,LOC107131209,HERC5,IRF7,STAT1,TIFA,C1R,USP18
BTA-1280215	Cytokine Signaling in Immune system	13	342	0.99	1.29	4.07e-07	9913.ENSBTAP00000005749,9913.ENSBTAP00000010366,9913.ENSBTAP00000011469,9913.ENSBTAP00000016365,9913.ENSBTAP00000019573,9913.ENSBTAP00000024505,9913.ENSBTAP00000031815,9913.ENSBTAP00000036313,9913.ENSBTAP00000041289,9913.ENSBTAP00000041757,9913.ENSBTAP00000058906,9913.ENSBTAP00000067158,9913.ENSBTAP00000071973	STAT2,IFIT1,EIF2AK2,UBA7,ISG15,PSMF1,IRF3,IRF9,MX1,RNASEL,HERC5,STAT1,USP18
BTA-909733	Interferon alpha/beta signaling	5	20	1.8	1.45	1.11e-05	9913.ENSBTAP00000005749,9913.ENSBTAP00000036313,9913.ENSBTAP00000041757,9913.ENSBTAP00000067158,9913.ENSBTAP00000071973	STAT2,IRF9,RNASEL,STAT1,USP18
BTA-168249	Innate Immune System	15	750	0.71	0.78	6e-05	9913.ENSBTAP00000009415,9913.ENSBTAP00000016359,9913.ENSBTAP00000016365,9913.ENSBTAP00000019573,9913.ENSBTAP00000020771,9913.ENSBTAP00000024505,9913.ENSBTAP00000031815,9913.ENSBTAP00000033956,9913.ENSBTAP00000042081,9913.ENSBTAP00000042856,9913.ENSBTAP00000058906,9913.ENSBTAP00000059765,9913.ENSBTAP00000068402,9913.ENSBTAP00000069754,9913.ENSBTAP00000071973	C1QA,B2M,UBA7,ISG15,VAV3,PSMF1,IRF3,FCER1G,ALDH3B1,LOC107131209,HERC5,IRF7,TIFA,C1R,USP18
BTA-168928	DDX58/IFIH1-mediated induction of interferon-alpha/beta	5	36	1.55	1.13	0.00011	9913.ENSBTAP00000016365,9913.ENSBTAP00000019573,9913.ENSBTAP00000031815,9913.ENSBTAP00000058906,9913.ENSBTAP00000059765	UBA7,ISG15,IRF3,HERC5,IRF7
BTA-936440	Negative regulators of DDX58/IFIH1 signaling	4	17	1.78	1.08	0.00023	9913.ENSBTAP00000016365,9913.ENSBTAP00000019573,9913.ENSBTAP00000031815,9913.ENSBTAP00000058906	UBA7,ISG15,IRF3,HERC5
BTA-197264	Nicotinamide salvaging	3	13	1.77	0.69	0.0051	9913.ENSBTAP00000012765,9913.ENSBTAP00000022152,9913.ENSBTAP00000029045	PARP10,PARP14,PARP9
BTA-912694	Regulation of IFNA/IFNB signaling	3	13	1.77	0.69	0.0051	9913.ENSBTAP00000005749,9913.ENSBTAP00000067158,9913.ENSBTAP00000071973	STAT2,STAT1,USP18
BTA-9013973	TICAM1-dependent activation of IRF3/IRF7	2	2	2.41	0.59	0.0122	9913.ENSBTAP00000031815,9913.ENSBTAP00000059765	IRF3,IRF7
BTA-166663	Initial triggering of complement	3	21	1.56	0.56	0.0138	9913.ENSBTAP00000009415,9913.ENSBTAP00000042856,9913.ENSBTAP00000069754	C1QA,LOC107131209,C1R
BTA-918233	TRAF3-dependent IRF activation pathway	2	4	2.1	0.5	0.0244	9913.ENSBTAP00000031815,9913.ENSBTAP00000059765	IRF3,IRF7
BTA-933541	TRAF6 mediated IRF7 activation	2	4	2.1	0.5	0.0244	9913.ENSBTAP00000031815,9913.ENSBTAP00000059765	IRF3,IRF7
BTA-977606	Regulation of Complement cascade	3	33	1.36	0.43	0.036	9913.ENSBTAP00000009415,9913.ENSBTAP00000042856,9913.ENSBTAP00000069754	C1QA,LOC107131209,C1R
