# Supplementary material for: Pregnancy establishment in cattle without embryonic interferon tau
Source: Research Square preprint supplement (doi:10.21203/rs.3.rs-8509201/v1), 2026-01-16
Supplement: Supplementary file 6 [file f2cd529640c5746d2cae3eba.xlsx]

## Sheet: Peptides IFNT Conditioned Media
				day 11							day 15							day 19							day 21
Protein	Protein.Ids	Sequence	Charge	IVF_d11_8	IVF_d11_10	IVF_d11_11	IVF_d11_12	WT_SCNT_d11_7	IFNT_KO_d11_2	IFNT_KO_d11_4	IVF_d15_8	IVF_d15_10	IVF_d15_11	IVF_d15_12	WT_SCNT_d15_7	IFNT_KO_d15_2	IFNT_KO_d15_4	IVF_d19_8	IVF_d19_10	IVF_d19_11	IVF_d19_12	WT_SCNT_d19_7	IFNT_KO_d19_2	IFNT_KO_d19_4	IVF_d21_8	IVF_d21_10	IVF_d21_11	IVF_d21_12	WT_SCNT_d21_7	IFNT_KO_d21_2	IFNT_KO_d21_4
Interferon tau	P56830;A0A3Q1LWI7;P56831;A0A3Q1N661;P15696	ALSSSTTLQK	2	NA	NA	NA	NA	NA	NA	NA	NA	81822.4	NA	NA	62700.9	NA	NA	NA	192085	642102	92629.2	295977	NA	NA	430231	216091	141094	482813	261036	NA	NA
Interferon tau	P56830;P56831	C(UniMod:4)YLSEDHMLGAR	2	NA	NA	NA	NA	NA	NA	NA	1551.05	NA	NA	NA	2526.61	NA	NA	183590	91972.8	130611	146538	125827	NA	NA	25550.2	17244.8	19943.7	26729.3	11554.8	NA	NA
Interferon tau	P56830;P56831	C(UniMod:4)YLSEDHMLGAR	3	NA	NA	NA	NA	NA	NA	NA	NA	NA	NA	NA	NA	NA	NA	204168	114241	159066	147078	139128	NA	NA	27259.4	14740.6	11974.9	19400.8	9459.2	NA	NA
Interferon tau	P56831;A0A3Q1N661	DFGLPQEM(UniMod:35)VEGSQLQK	2	NA	NA	NA	NA	NA	NA	NA	NA	NA	NA	NA	NA	NA	NA	5681.05	9439.82	6164.62	2656.61	5543.35	NA	NA	NA	3088.2	NA	2461.15	2751.61	NA	NA
Interferon tau	P56831;A0A3Q1N661	DFGLPQEMVEGSQLQK	2	NA	NA	NA	NA	NA	NA	NA	NA	3292.97	1649.42	1517.7	4779.63	NA	NA	180889	220351	325103	171698	137832	NA	NA	48537.9	59122.5	65068.9	48552.6	17076.2	NA	NA
Interferon tau	A0A3Q1ML43	DFGLPWEMVEGDQLQK	2	NA	NA	NA	NA	NA	NA	NA	NA	NA	NA	NA	NA	NA	NA	6934.05	NA	1168.24	1715.75	2305.35	NA	NA	NA	775.632	651.555	567.551	NA	NA	NA
Interferon tau	P56830;A0A3Q1LWI7;P56831;A0A3Q1N661;P15696	LSPHPC(UniMod:4)LQDR	2	NA	NA	NA	NA	4961.89	NA	NA	70790.5	46468.5	33066	63669.1	127624	NA	NA	766453	237401	384458	349238	496933	NA	NA	271086	168470	162775	338131	230291	NA	NA
Interferon tau	P56831;A0A3Q1N661	YFQDIHVYLK	2	NA	NA	NA	NA	NA	NA	NA	NA	NA	NA	NA	NA	NA	NA	NA	NA	NA	NA	NA	NA	NA	16419.2	NA	NA	19752.1	NA	NA	NA

## Sheet: Sum of intensities AA (log2)
Protein	Sample	Day	Grouping	LFQ IFNT
Interferon tau	2	11	IFNT_KO_d11	NA
Interferon tau	4	11	IFNT_KO_d11	NA
Interferon tau	7	11	WT_SCNT_d11	12.28
Interferon tau	8	11	IVF_d11	NA
Interferon tau	10	11	IVF_d11	NA
Interferon tau	11	11	IVF_d11	NA
Interferon tau	12	11	IVF_d11	NA
Interferon tau	2	15	IFNT_KO_d15	NA
Interferon tau	4	15	IFNT_KO_d15	NA
Interferon tau	7	15	WT_SCNT_d15	17.59
Interferon tau	8	15	IVF_d15	16.14
Interferon tau	10	15	IVF_d15	17.01
Interferon tau	11	15	IVF_d15	15.08
Interferon tau	12	15	IVF_d15	15.99
Interferon tau	2	19	IFNT_KO_d19	NA
Interferon tau	4	19	IFNT_KO_d19	NA
Interferon tau	7	19	WT_SCNT_d19	20.2
Interferon tau	8	19	IVF_d19	20.36
Interferon tau	10	19	IVF_d19	19.72
Interferon tau	11	19	IVF_d19	20.65
Interferon tau	12	19	IVF_d19	19.8
Interferon tau	2	21	IFNT_KO_d21	NA
Interferon tau	4	21	IFNT_KO_d21	NA
Interferon tau	7	21	WT_SCNT_d21	19.02
Interferon tau	8	21	IVF_d21	19.64
Interferon tau	10	21	IVF_d21	18.87
Interferon tau	11	21	IVF_d21	18.62
Interferon tau	12	21	IVF_d21	19.84
